# Supplementary material
Source: PubMed Central journal article supplement (PMC8514738)
Supplement: NIHMS1740316-supplement-Supplementary_Table_6_Selleckchem_library_QC.pdf [file NIHMS1740316-supplement-Supplementary_Table_6_Selleckchem_library_QC.pdf]

```

=====
Acq. Operator   : SYSTEM                      Seq. Line :    2
Acq. Instrument : 12601c                     Location  : Vial 24

                                           Inj Volume : 2.000 µl
Different Inj Volume from Sample Entry! Actual Inj Volume : 1.000 µl
=====
    
```

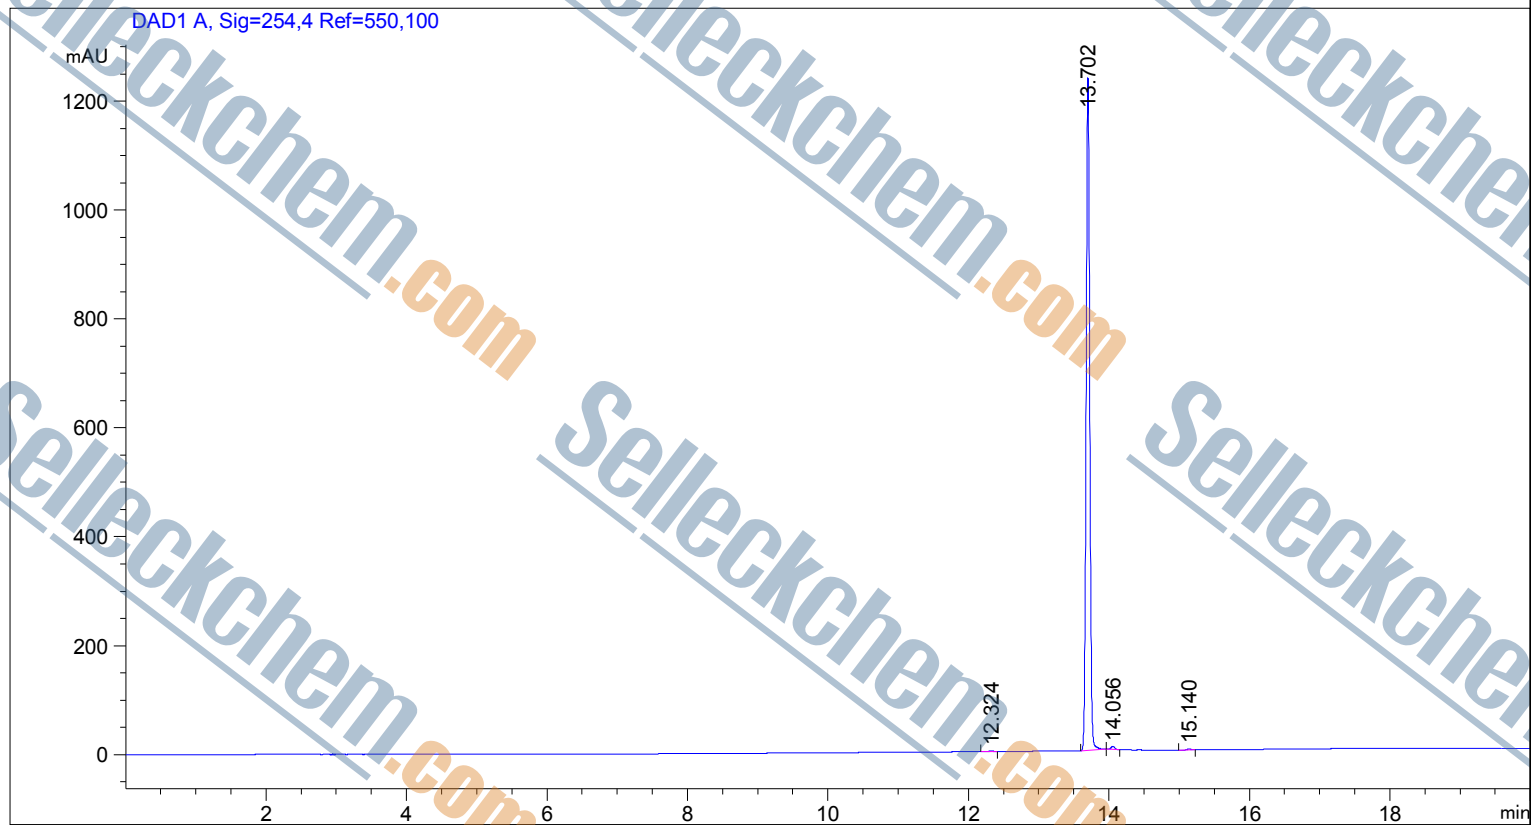

Area Percent Report

```

=====
Sorted By      : Signal
Multiplier     : 1.0000
Dilution       : 1.0000
Use Multiplier & Dilution Factor with ISTDs
    
```

Signal 1: DAD1 A, Sig=254,4 Ref=550,100

| Peak # | RetTime [min] | Type | Width [min] | Area [mAU*s] | Height [mAU] | Area %  |
|--------|---------------|------|-------------|--------------|--------------|---------|
| 1      | 12.324        | BB   | 0.0616      | 5.68888      | 1.42565      | 0.1289  |
| 2      | 13.702        | BB   | 0.0554      | 4380.64502   | 1234.97559   | 99.2577 |
| 3      | 14.056        | BB   | 0.0545      | 19.95087     | 5.60716      | 0.4521  |
| 4      | 15.140        | BB   | 0.0517      | 7.12300      | 2.14891      | 0.1614  |

Totals : 4413.40777 1244.15731

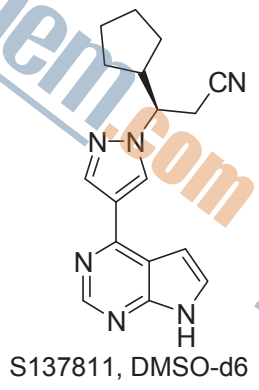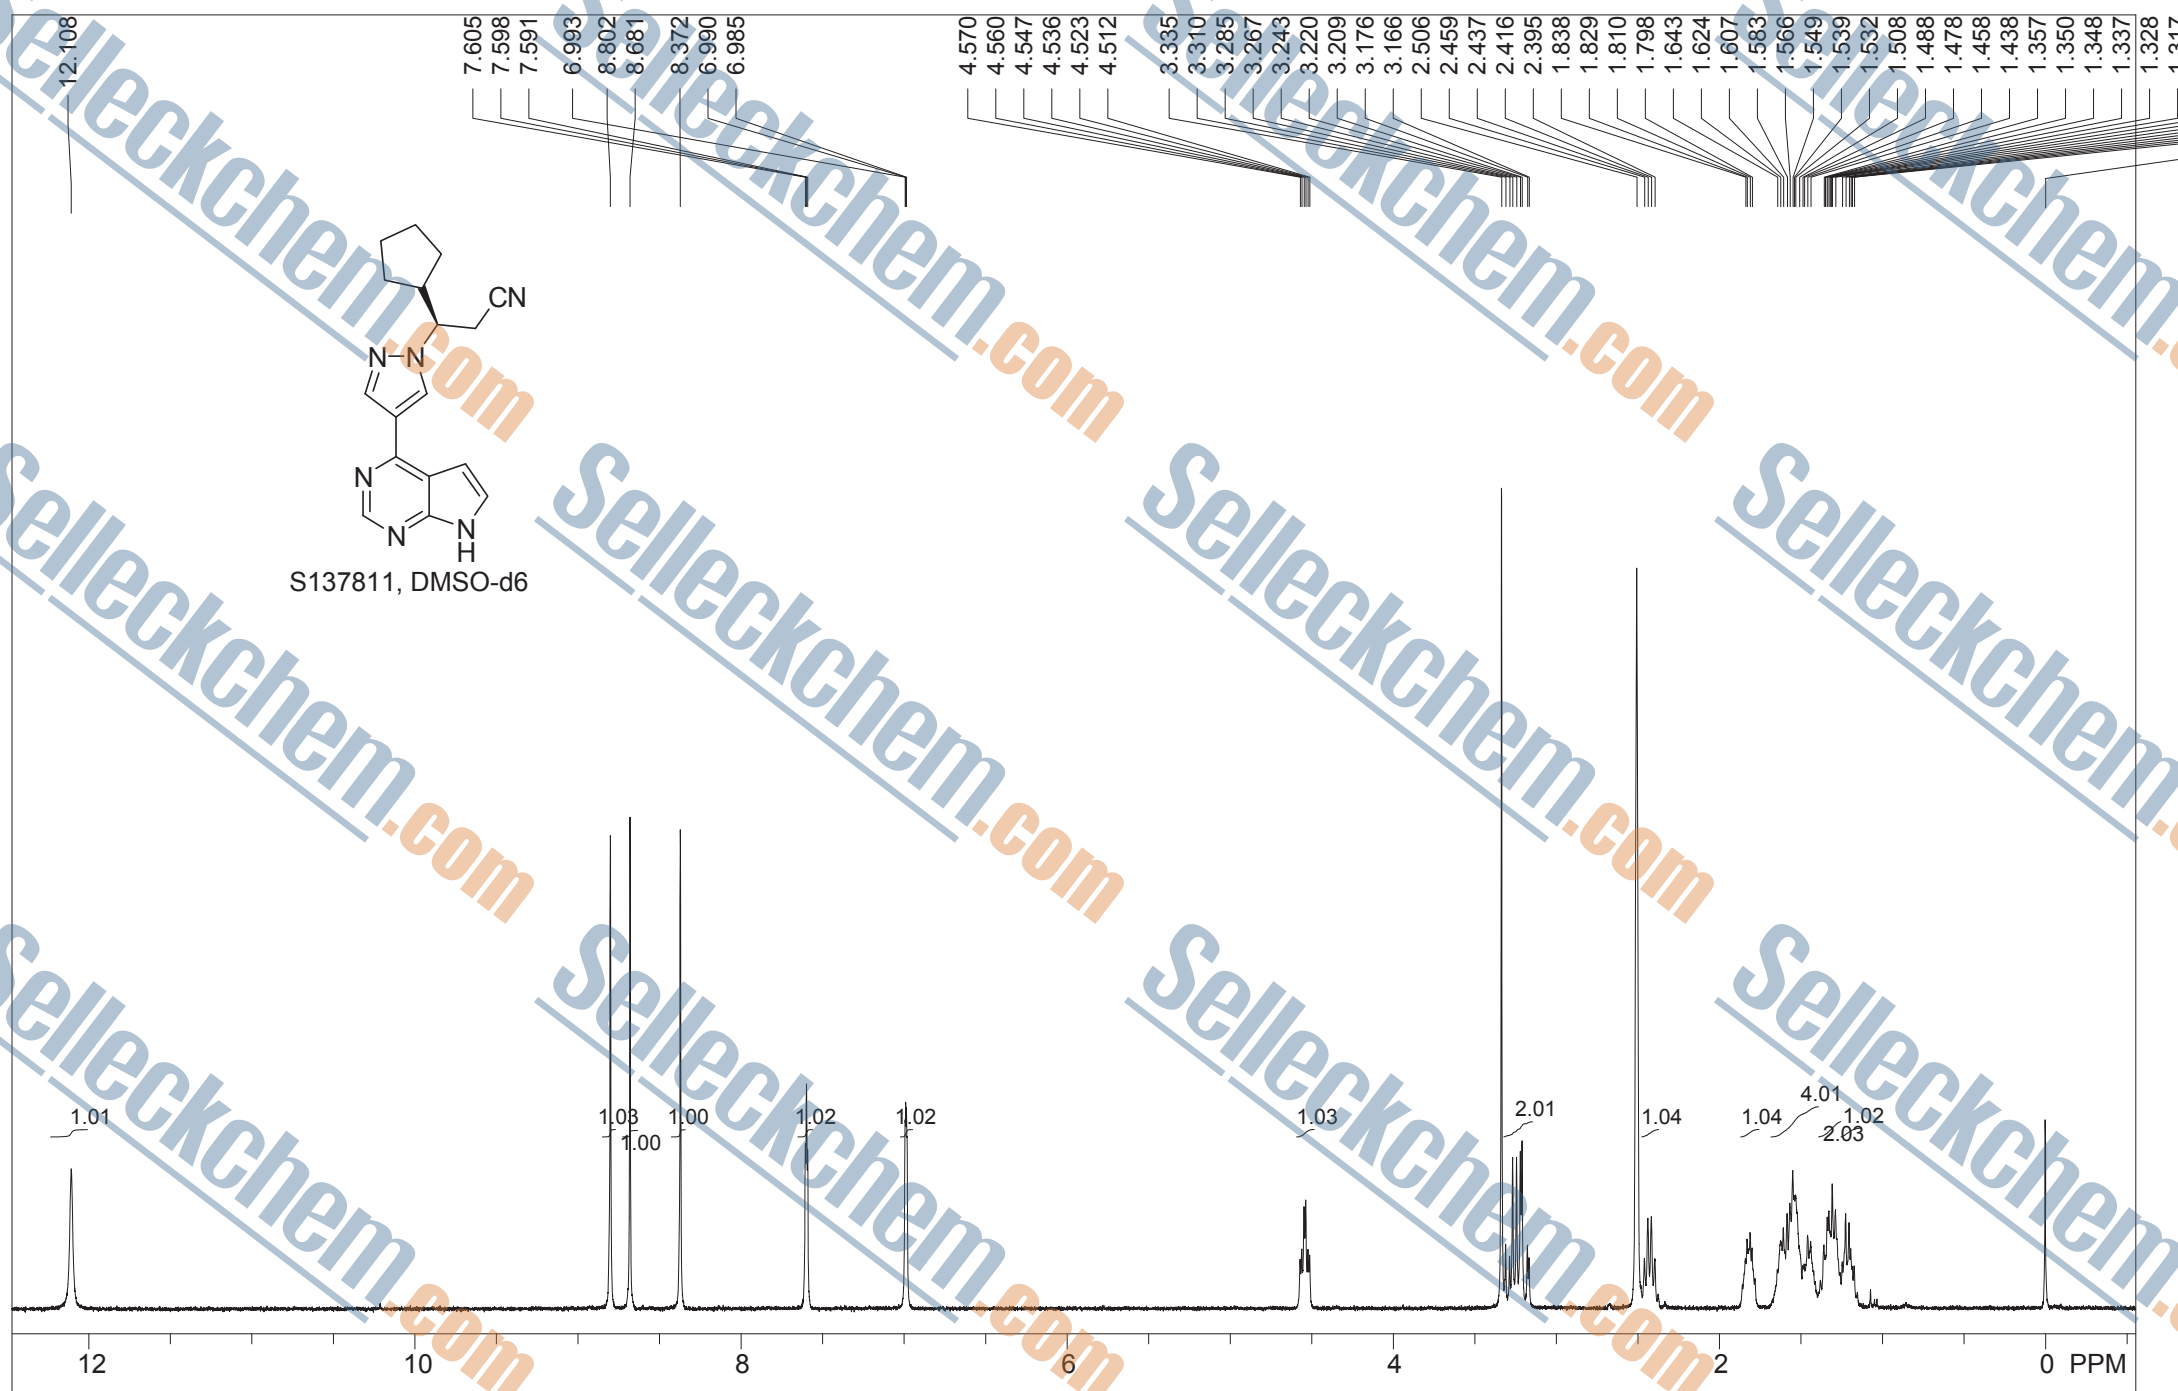

STANDARD PROTON PARAMETERSga:blank line:blank line:blank line

|             |             |             |             |                                          |
|-------------|-------------|-------------|-------------|------------------------------------------|
| F1: 399.665 | F2: 100.504 | SW1: 8803   | OF1: 3607.6 | PTS1d: 32768 , 32768                     |
| EX: s2pul   | PW: 6.5 us  | PD: 1.0 sec | NA: 8       | LB: 0.0                                  |
|             |             |             |             | Nuts - SS137811 Ruxolitinib (INCB018424) |

Acq. Operator : SYSTEM  
Acq. Instrument : 12601c

Seq. Line : 1  
Location : Vial 30

Inj Volume : 2.000 µl

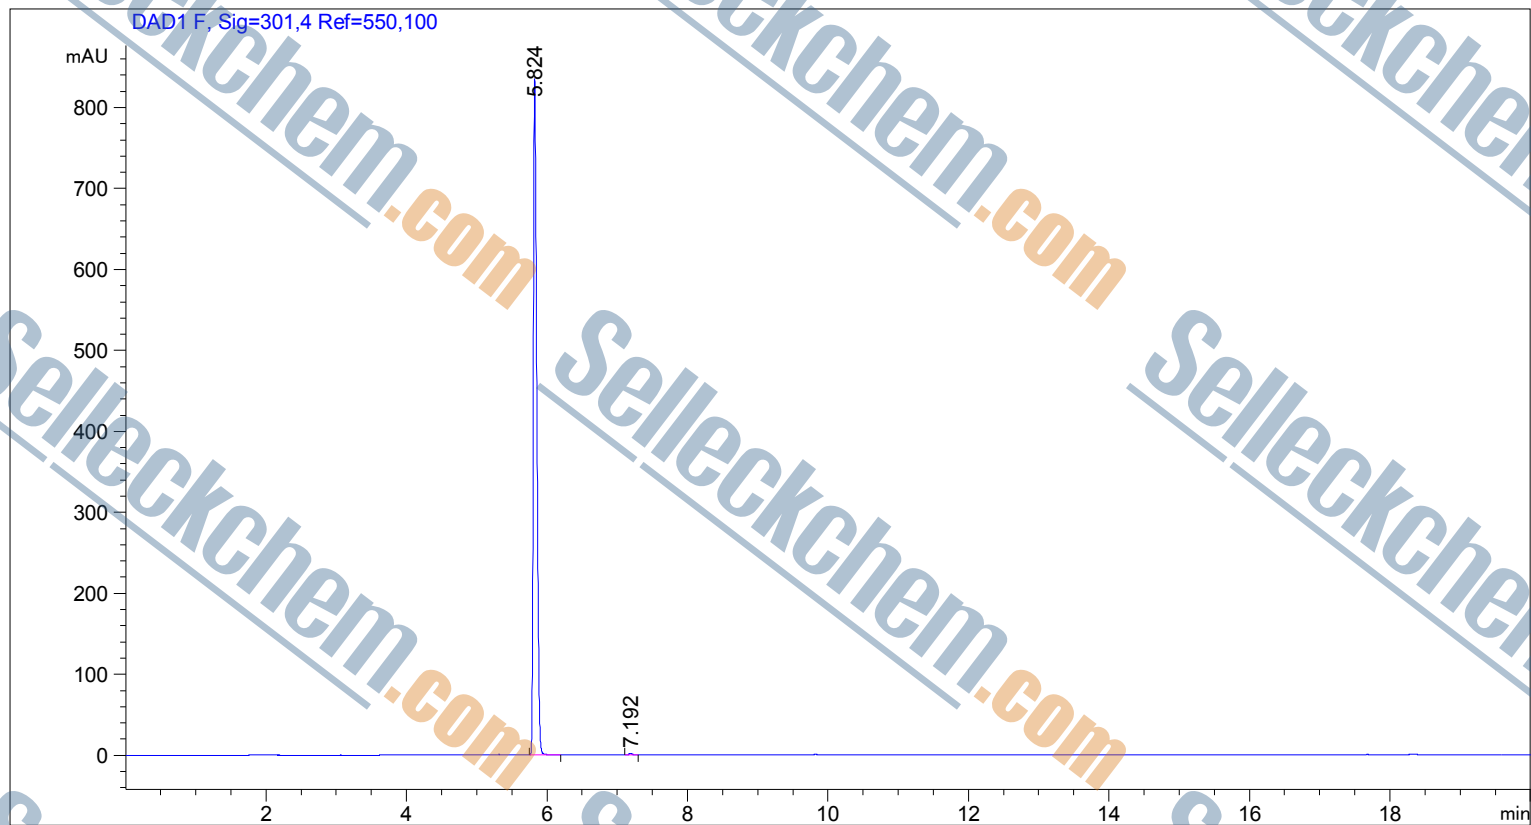

Area Percent Report

Sorted By : Signal  
Multiplier : 1.0000  
Dilution : 1.0000  
Use Multiplier & Dilution Factor with ISTDs

Signal 1: DAD1 F, Sig=301,4 Ref=550,100

| Peak # | RetTime [min] | Type | Width [min] | Area [mAU*s] | Height [mAU] | Area %  |
|--------|---------------|------|-------------|--------------|--------------|---------|
| 1      | 5.824         | BB   | 0.0519      | 2819.56348   | 835.04297    | 99.7591 |
| 2      | 7.192         | BB   | 0.0517      | 6.80944      | 2.05411      | 0.2409  |

Totals : 2826.37292 837.09708

## SAMPLE INFORMATION

|                   |                     |                     |               |
|-------------------|---------------------|---------------------|---------------|
| Sample Name:      | F627 S148602 AEE788 | Acquired By:        | System        |
| Sample Type:      | Unknown             |                     |               |
| Vial:             | 1                   | Acq. Method Set:    | YZR           |
| Injection #:      | 5                   | Processing Method:  | 327           |
| Injection Volume: | 20.00 ul            | Channel Name:       | 2487Channel 1 |
| Run Time:         | 30.0 Minutes        | Proc. Chnl. Descr.: | 327           |
| Sample Set Name:  |                     |                     |               |

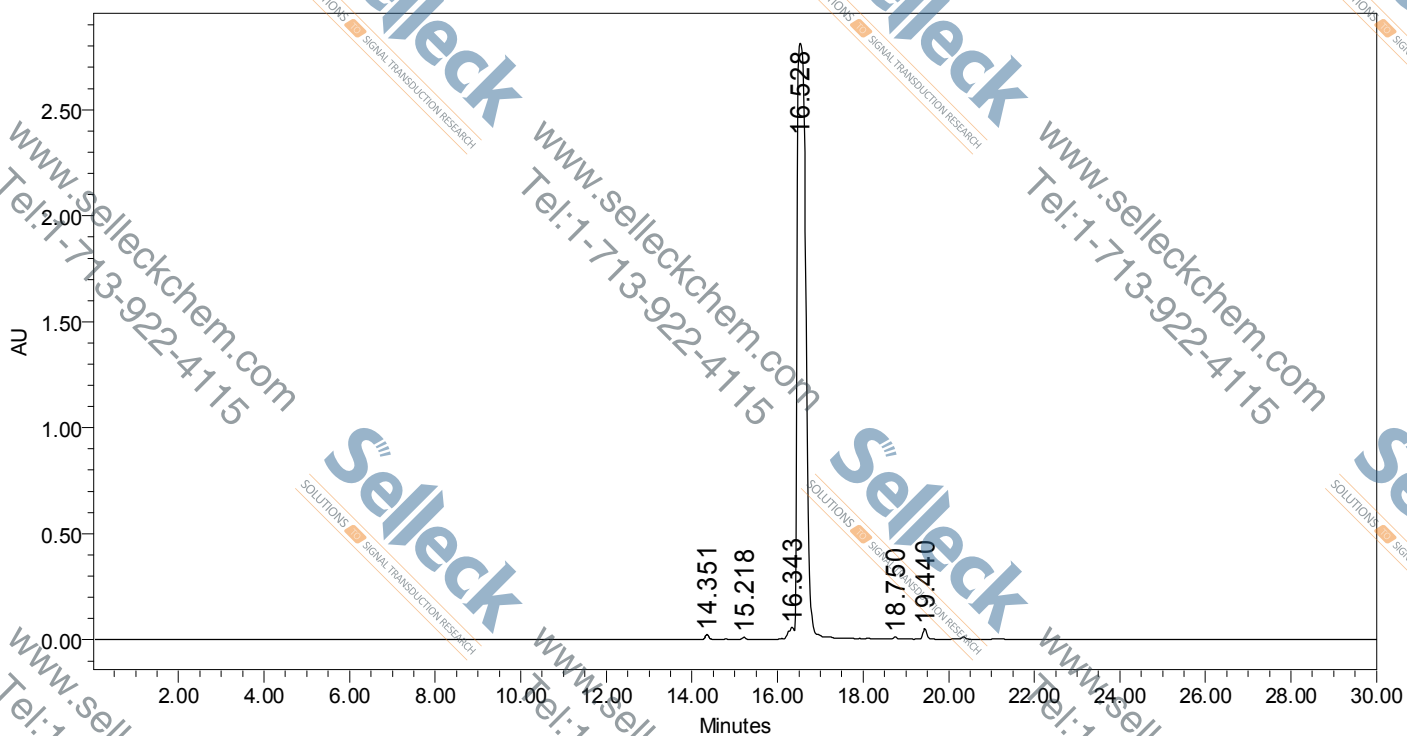

|   | RT     | Area     | % Area | Height  |
|---|--------|----------|--------|---------|
| 1 | 14.351 | 151696   | 0.38   | 24310   |
| 2 | 15.218 | 64887    | 0.16   | 11222   |
| 3 | 16.343 | 492569   | 1.25   | 54435   |
| 4 | 16.528 | 38348957 | 97.23  | 2822404 |
| 5 | 18.750 | 63973    | 0.16   | 10326   |
| 6 | 19.440 | 317901   | 0.81   | 49450   |

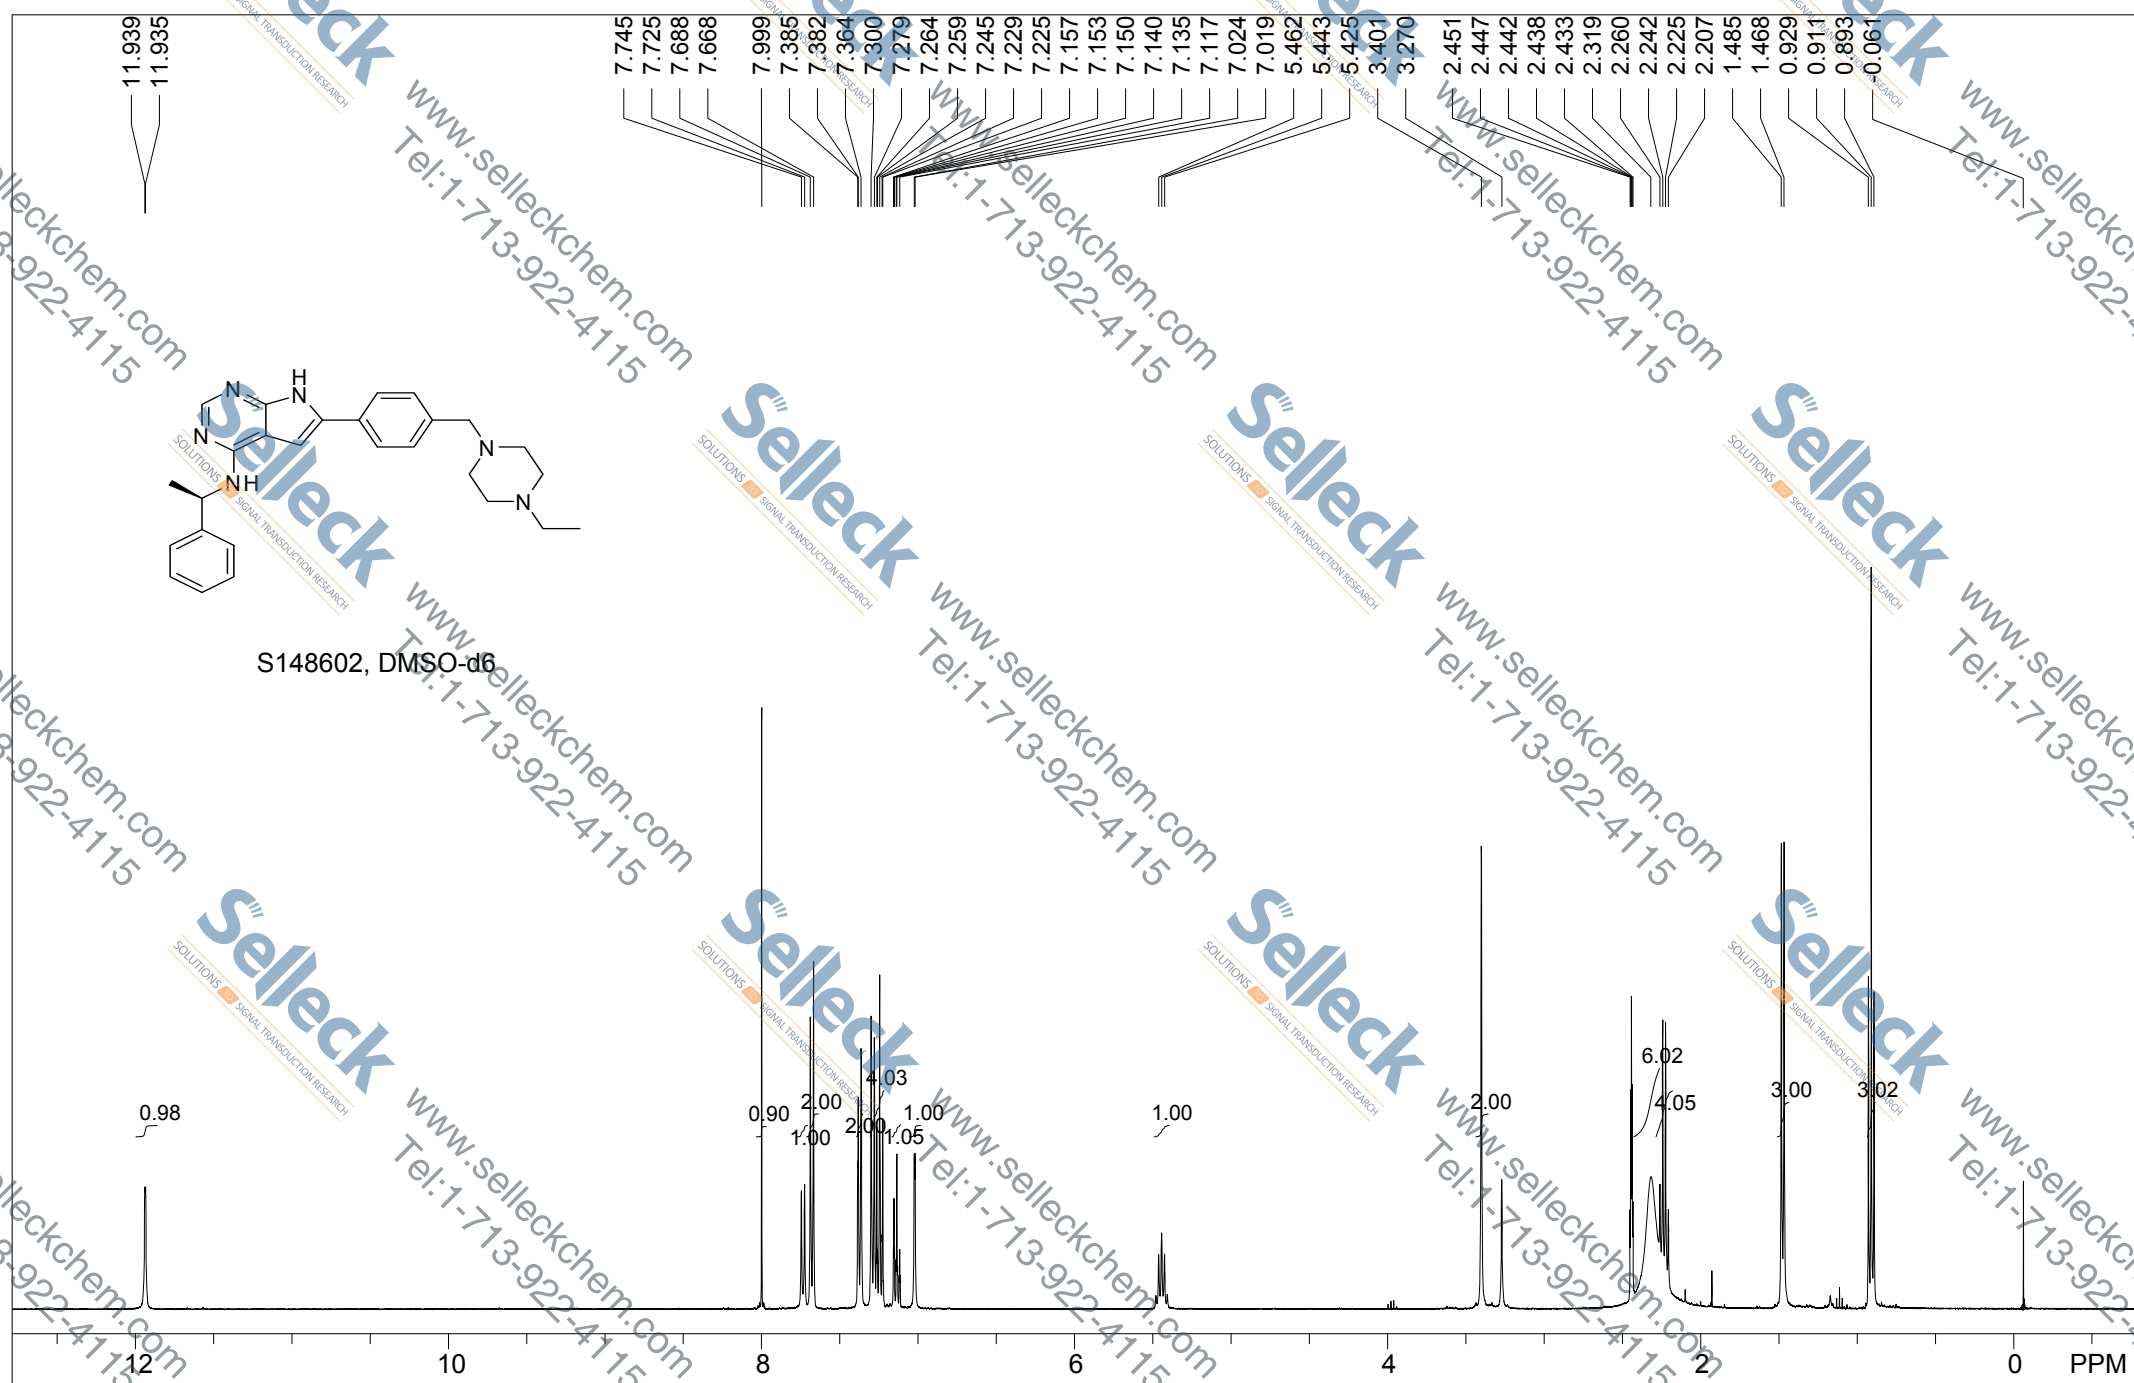

S148602, DMSO-d6

|                       |             |             |             |              |                         |
|-----------------------|-------------|-------------|-------------|--------------|-------------------------|
| Std proton:blank line |             |             |             |              |                         |
| F1: 399.635           | F2: 100.497 | SW1: 8065   | OF1: 3200.4 | PTS1d: 16521 | 32768                   |
| EX: s2pul             | PW: 7.2 us  | PD: 2.0 sec | NA: 8       | LB: 0.0      | Nuts - \$S148602 AEE788 |

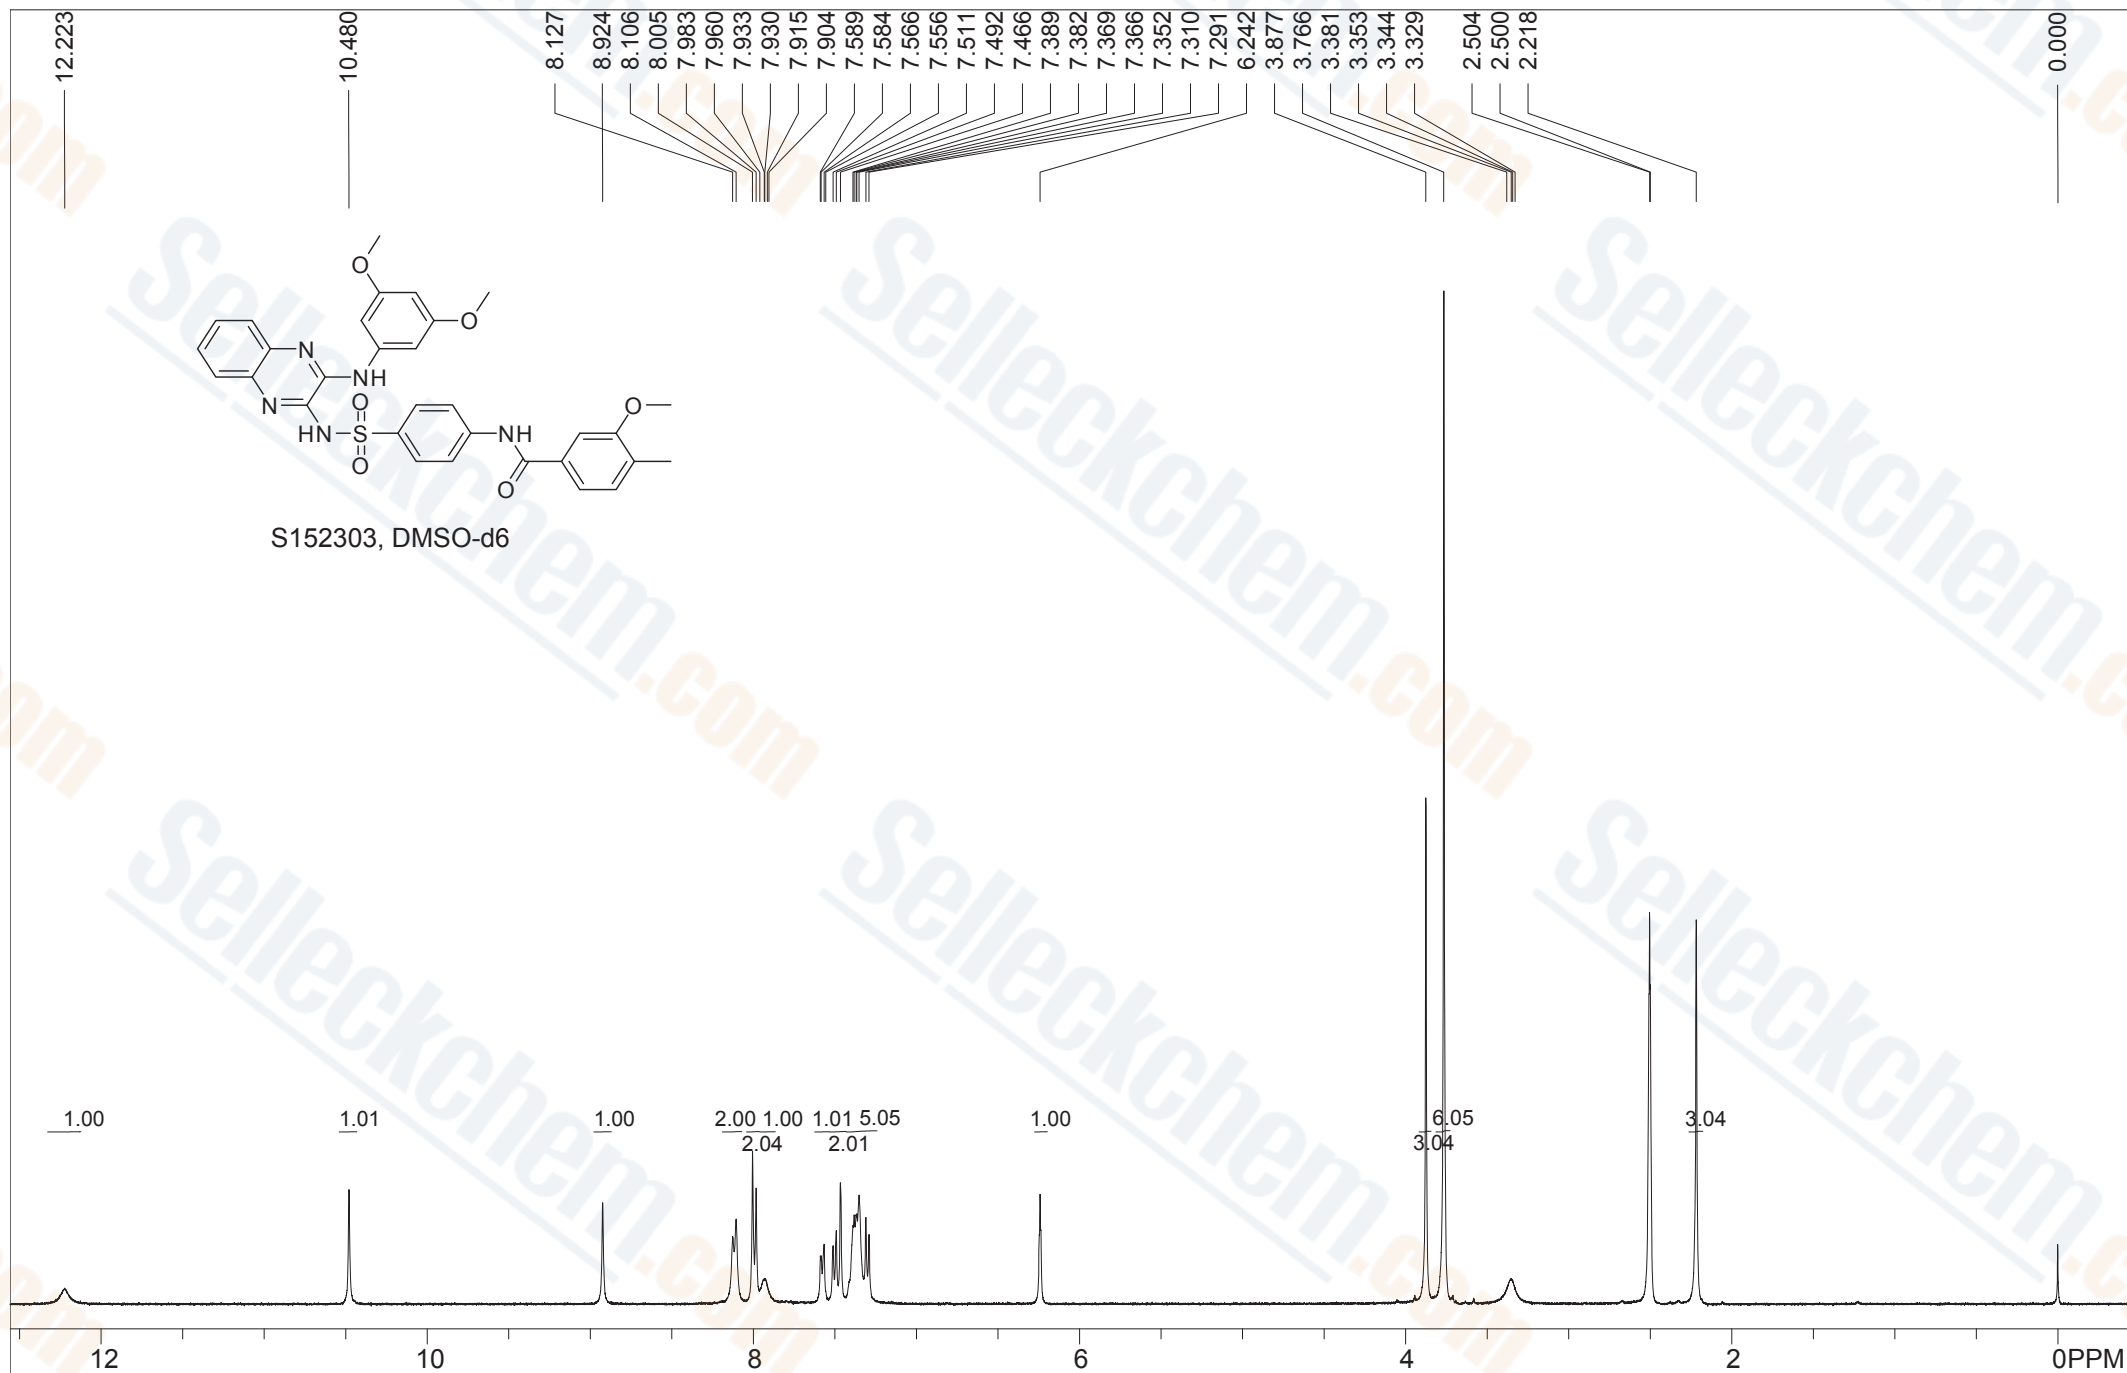

STANDARD PROTON PARAMETERS

|             |             |             |             |                      |
|-------------|-------------|-------------|-------------|----------------------|
| F1: 399.658 | F2: 100.503 | SW1: 8803   | OF1: 3607.8 | PTS1d: 32768 , 32768 |
| EX: s2pul   | PW: 6.5 us  | PD: 1.0 sec | NA: 8       | LB: 0.0              |

Nuts - \$S152303 XL765

# SAMPLE INFORMATION

Sample Name: F4179 S152303 XL765  
Sample Type:  
Viat: 1  
Injection #: 10  
Injection Volume: 20.00 ul  
Run Time: 30.0 Minutes  
Sample Set Name:

Acquirde By: System  
Acq. Method Set: Z  
Processing Method: 273  
Channel Name:  
Proc. Chnl. Descr: 273

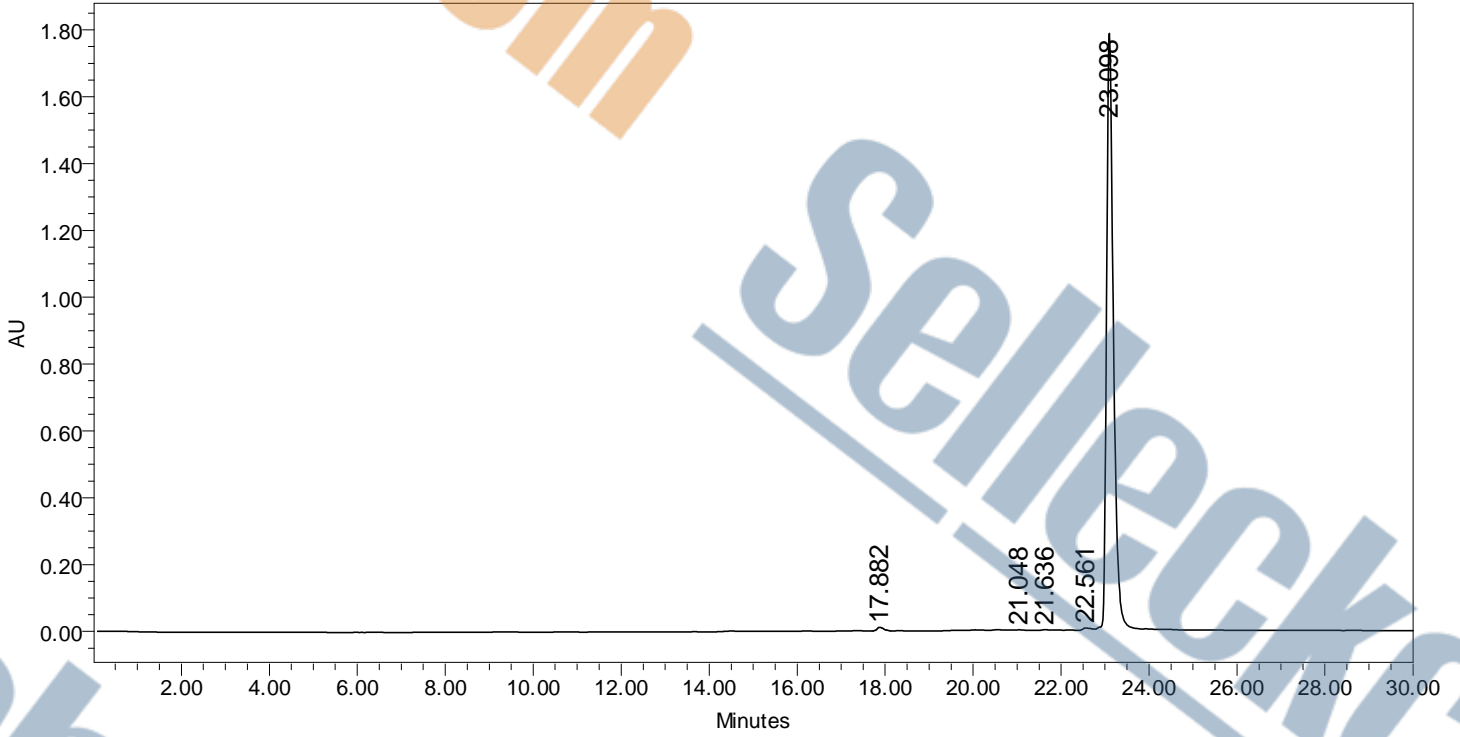

|   | RT     | Area     | Height  | % Area |
|---|--------|----------|---------|--------|
| 1 | 17.882 | 106438   | 10417   | 0.55   |
| 2 | 21.048 | 8828     | 1203    | 0.05   |
| 3 | 21.636 | 14660    | 1658    | 0.08   |
| 4 | 22.561 | 40782    | 4692    | 0.21   |
| 5 | 23.098 | 19293797 | 1781534 | 99.12  |

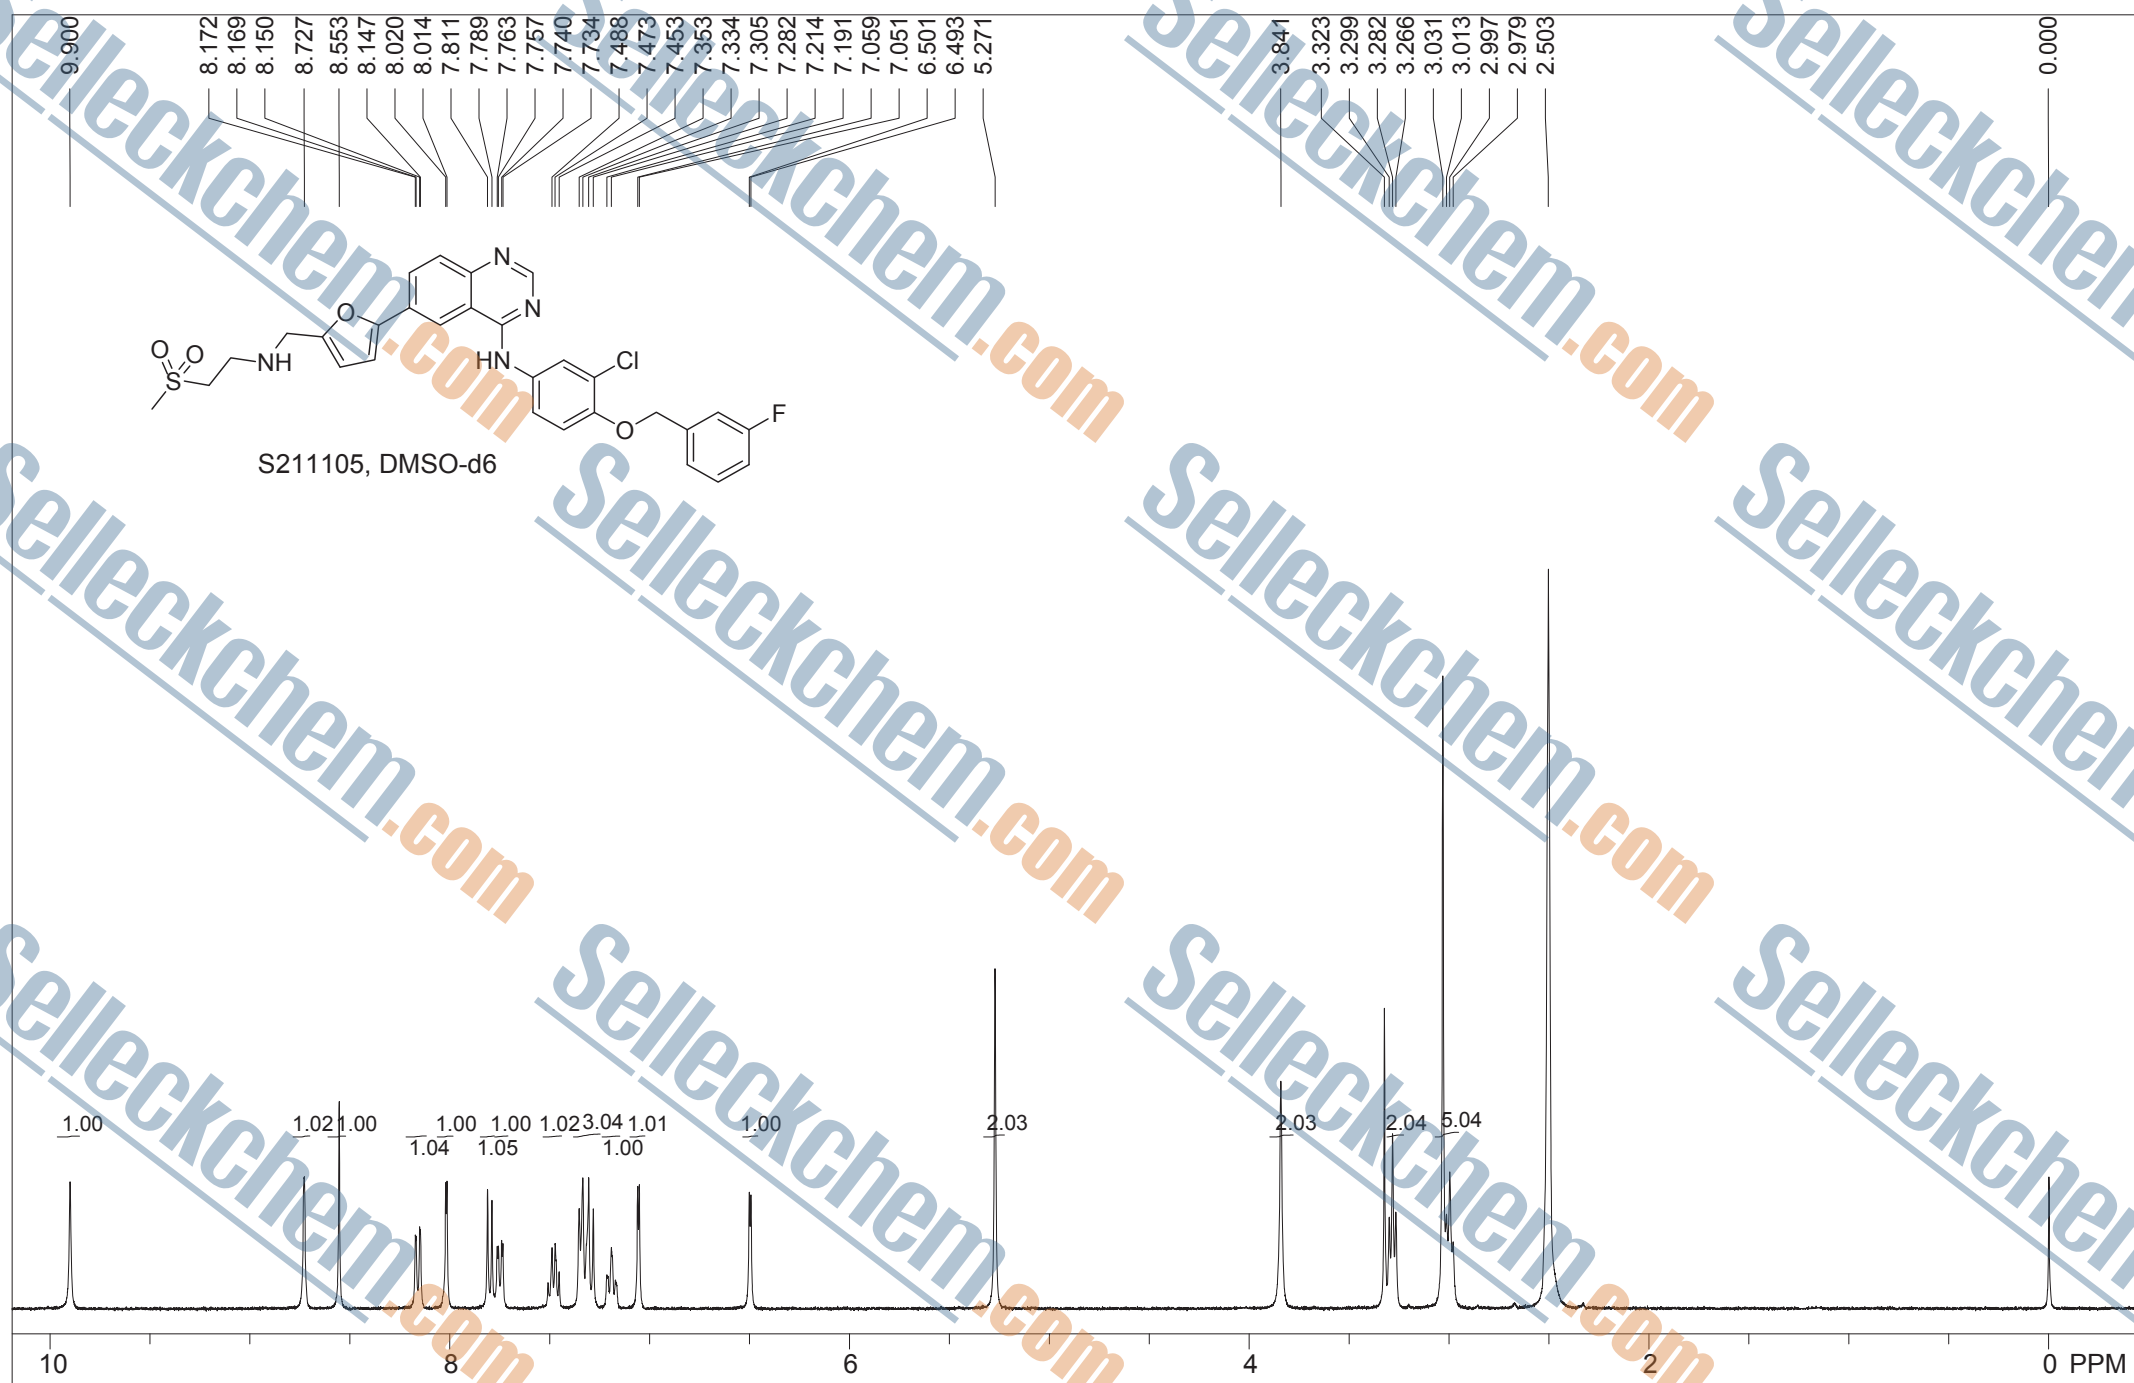

STANDARD PROTON PARAMETERS

|             |             |             |             |                      |
|-------------|-------------|-------------|-------------|----------------------|
| F1: 399.658 | F2: 100.503 | SW1: 8803   | OF1: 3607.3 | PTS1d: 32768 , 32768 |
| EX: s2pul   | PW: 6.5 us  | PD: 1.0 sec | NA: 8       | LB: 0.0              |

Nuts - SS211105 Lapatinib



# Sample Information

Sample Name: F 4630 S 211105 Lapatinib  
Sample Type:  
Injection#: 15  
Injection Volume: 10.00 ul  
Run Time: 20.0 Minutes

Acq Method: F  
Processing Method: K2  
Channel: 319.0 nm

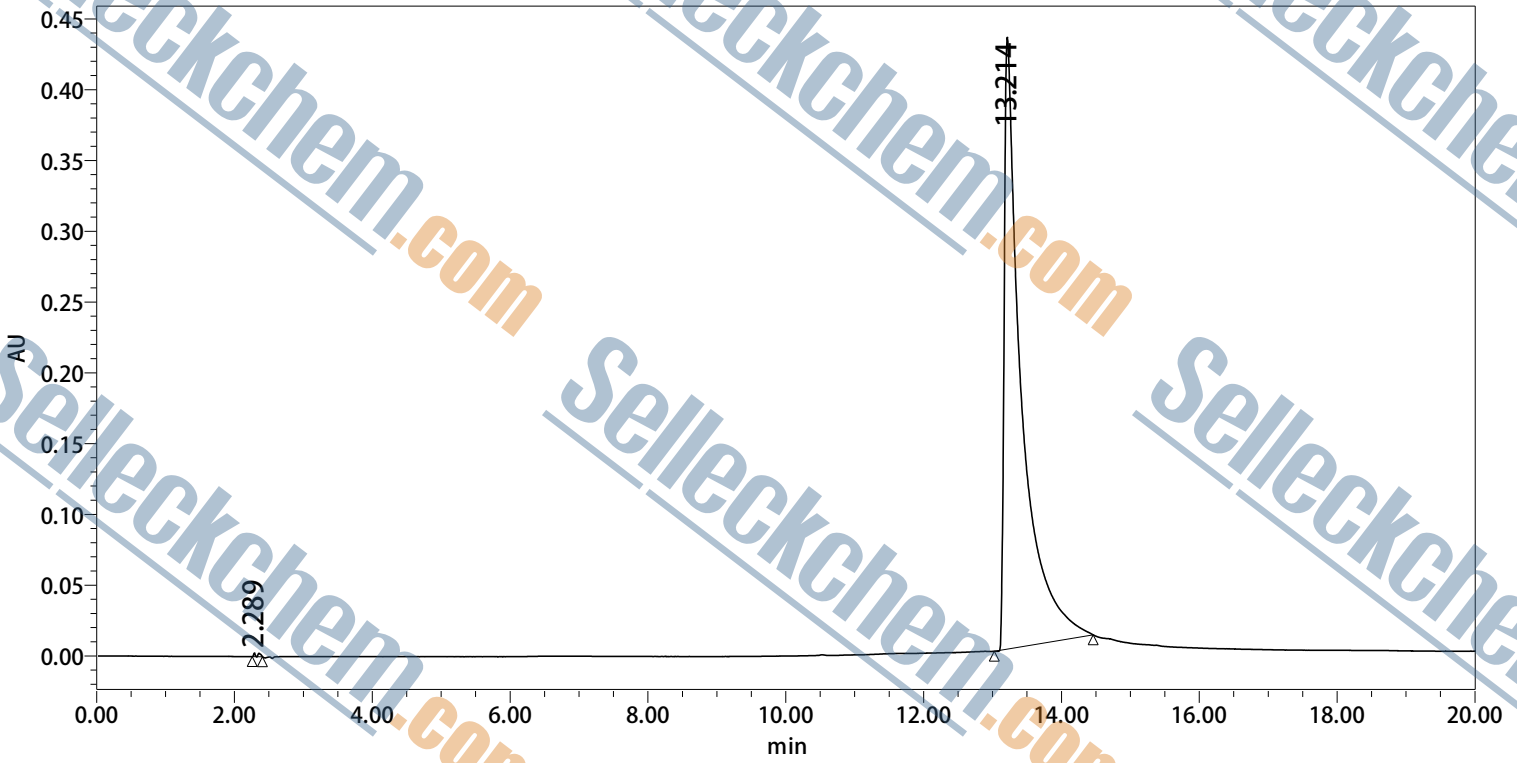

Result

|   | Name | RT     | Area    | % Area |
|---|------|--------|---------|--------|
| 1 |      | 2.289  | 10571   | 0.14   |
| 2 |      | 13.214 | 7547012 | 99.86  |

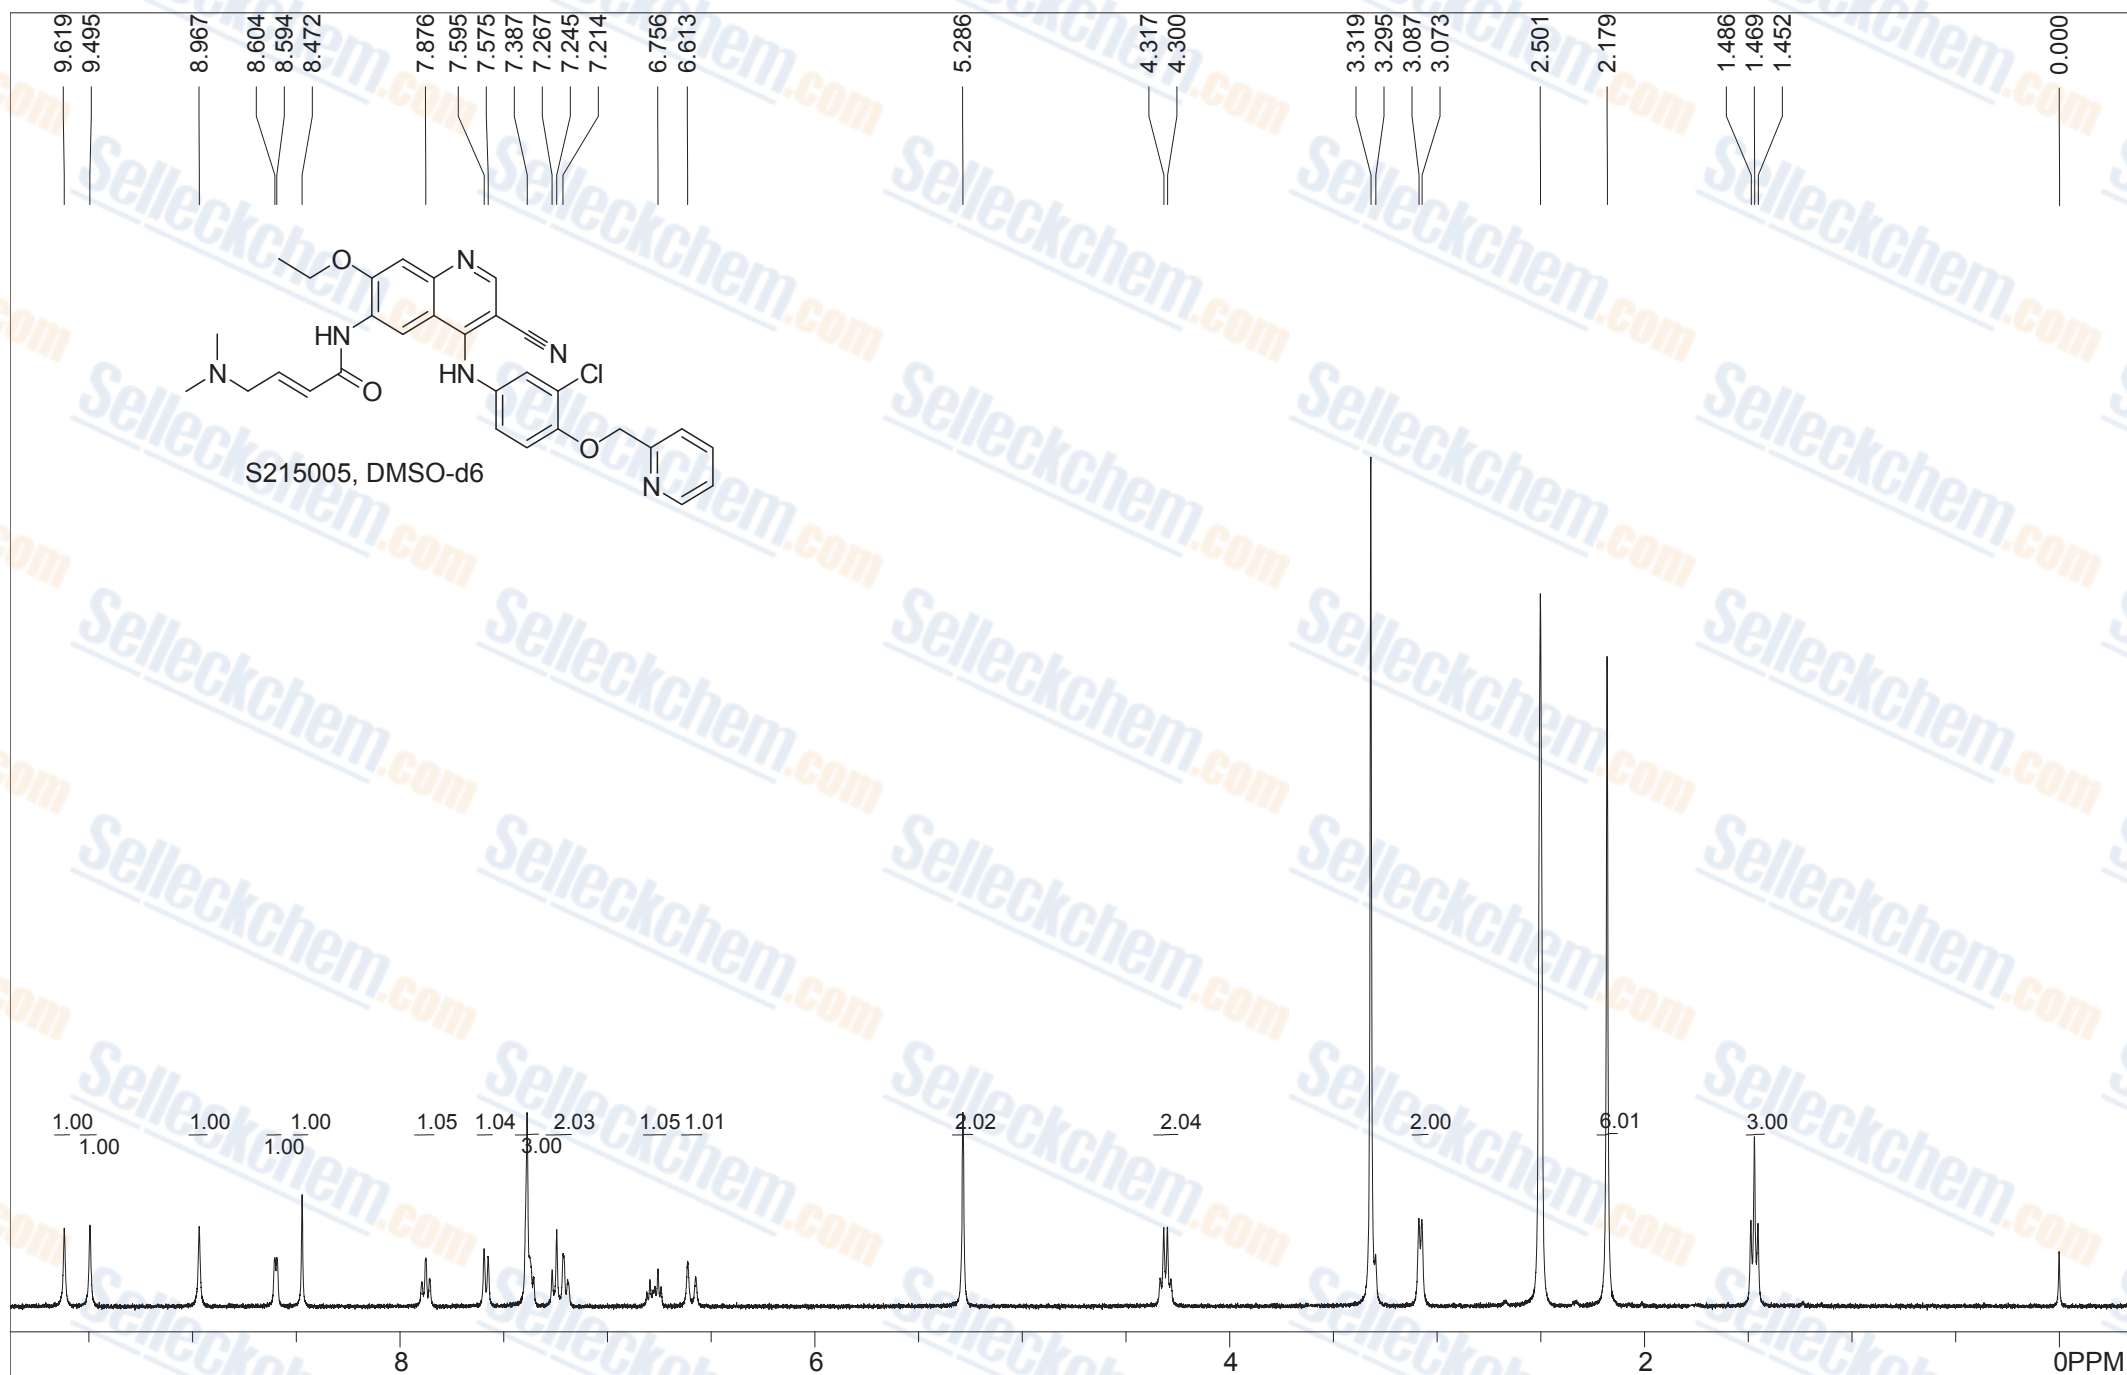

STANDARD PROTON PARAMETERS

|             |             |             |             |                     |
|-------------|-------------|-------------|-------------|---------------------|
| F1: 399.657 | F2: 100.503 | SW1: 6831   | OF1: 2607.7 | PTS1d: 32768, 32768 |
| EX: s2pul   | PW: 6.5 us  | PD: 1.0 sec | NA: 8       | LB: 0.0             |

Nuts - \$S215005 Neratinib (HKI-272)



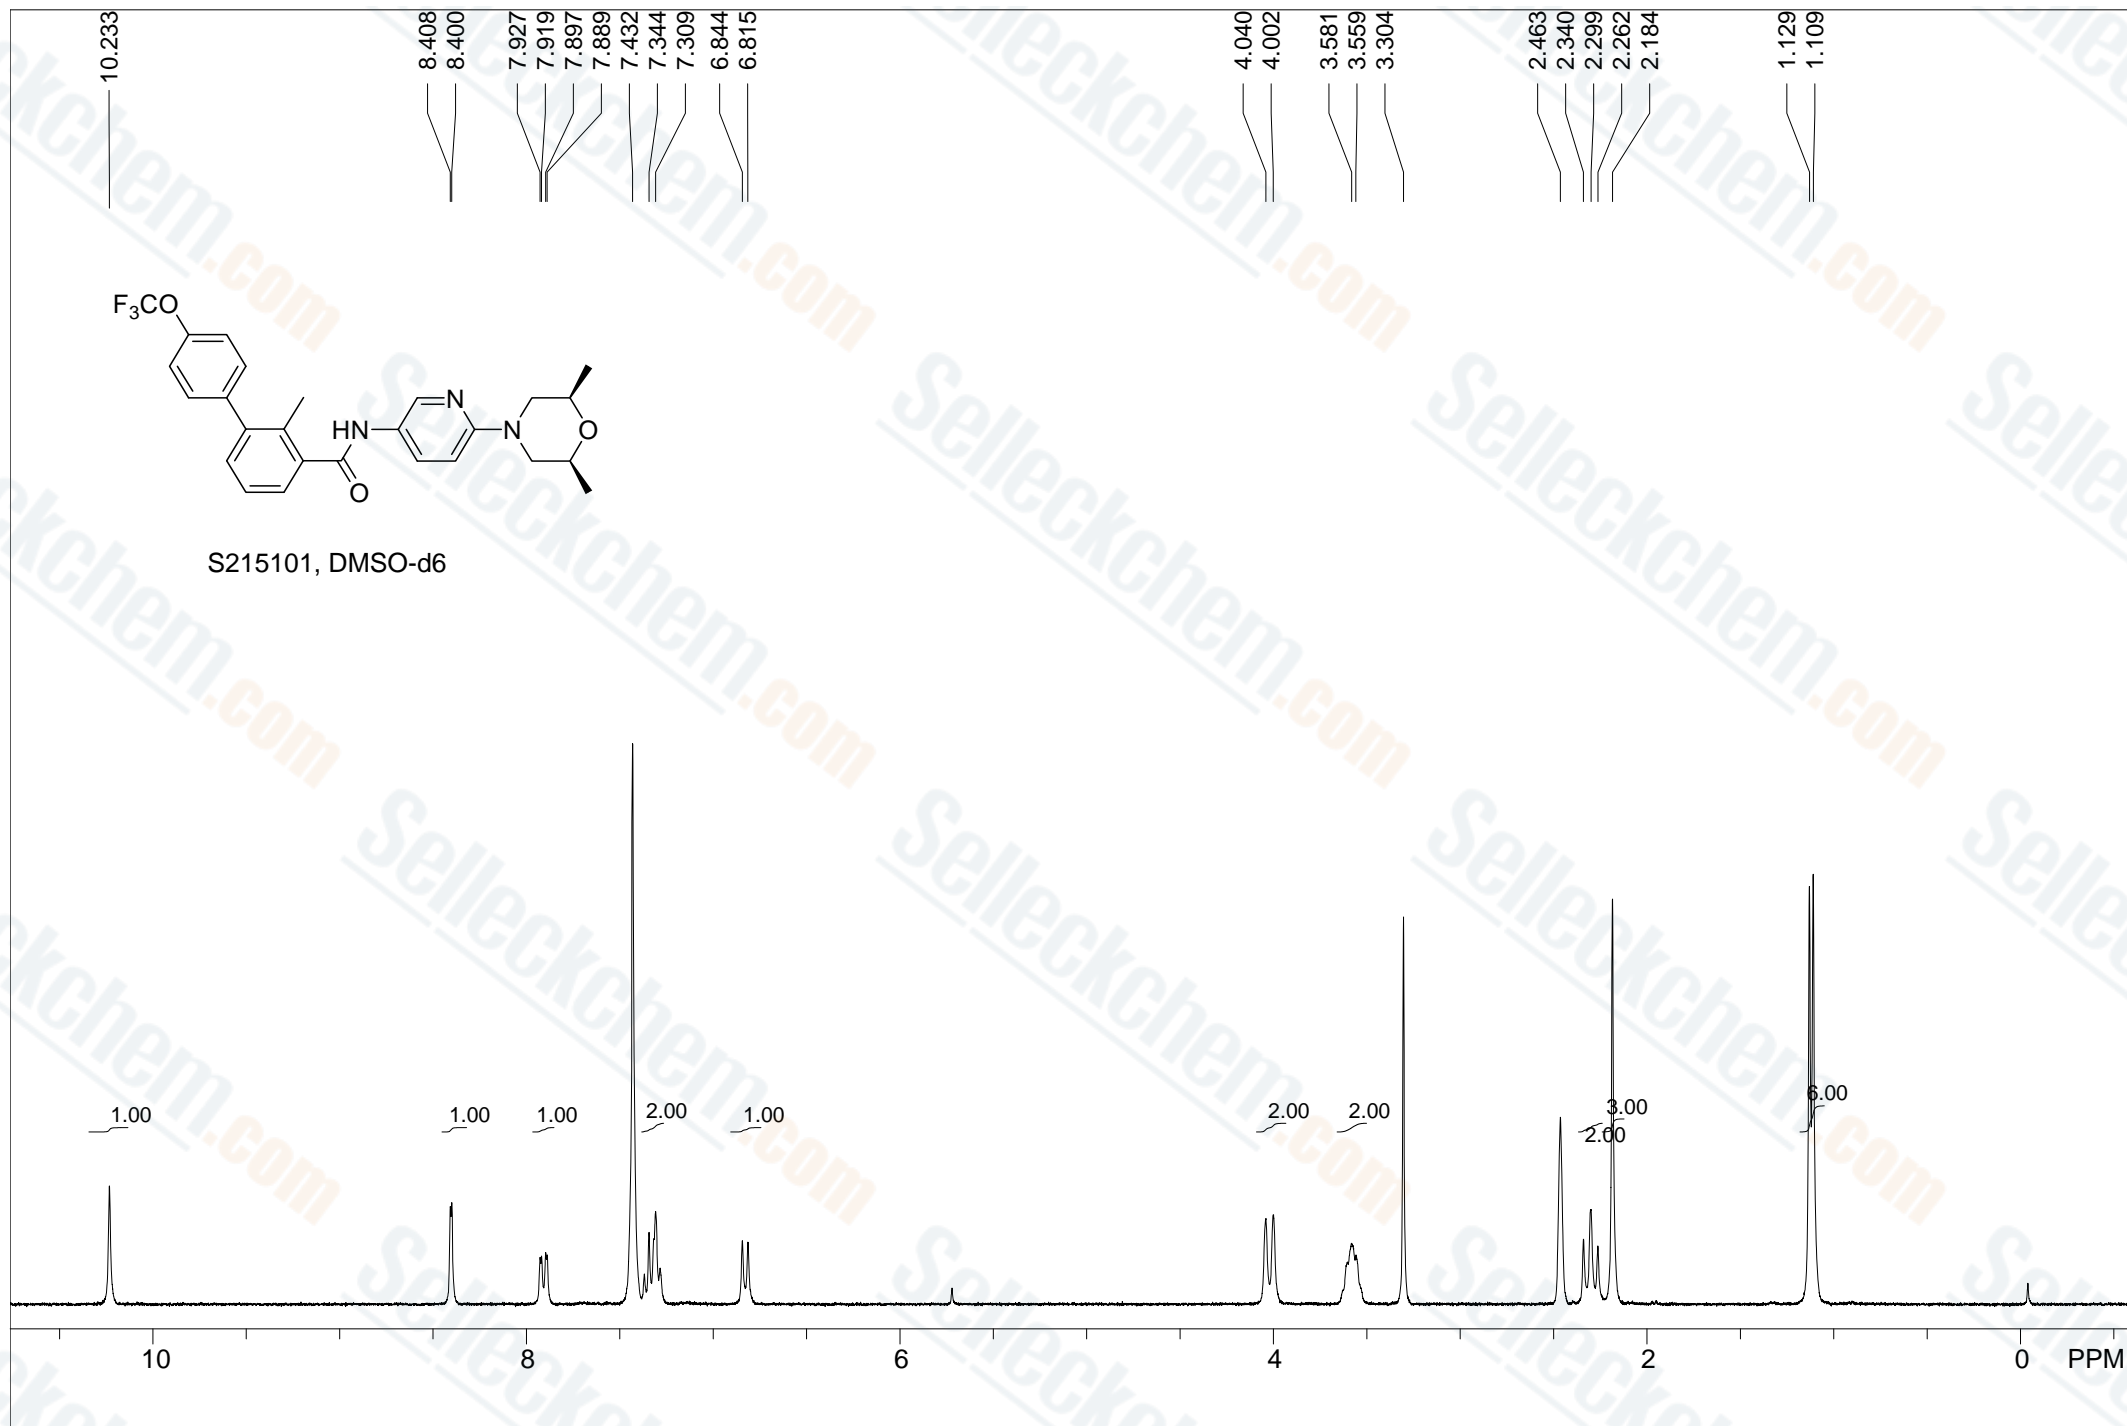

|             |             |             |             |              |
|-------------|-------------|-------------|-------------|--------------|
| F1: 300.130 | F2: 1.000   | SW1: 7485   | OF1: 1385.9 | PTS1d: 32768 |
| EX: zg30    | PW: 10.0 us | PD: 1.0 sec | NA: 17      | LB: 0.0      |

## SAMPLE INFORMATION

|                                  |                             |
|----------------------------------|-----------------------------|
| Sample Name: F475 S215101 LDE225 | Acquired By: System         |
| Sample Type: Unknown             |                             |
| Vial: 1                          | Acq. Method Set: YZR        |
| Injection #: 13                  | Processing Method: 276      |
| Injection Volume: 20.00 ul       | Channel Name: 2487Channel 1 |
| Run Time: 26.0 Minutes           | Proc. Chnl. Descr.: 276     |
| Sample Set Name:                 |                             |

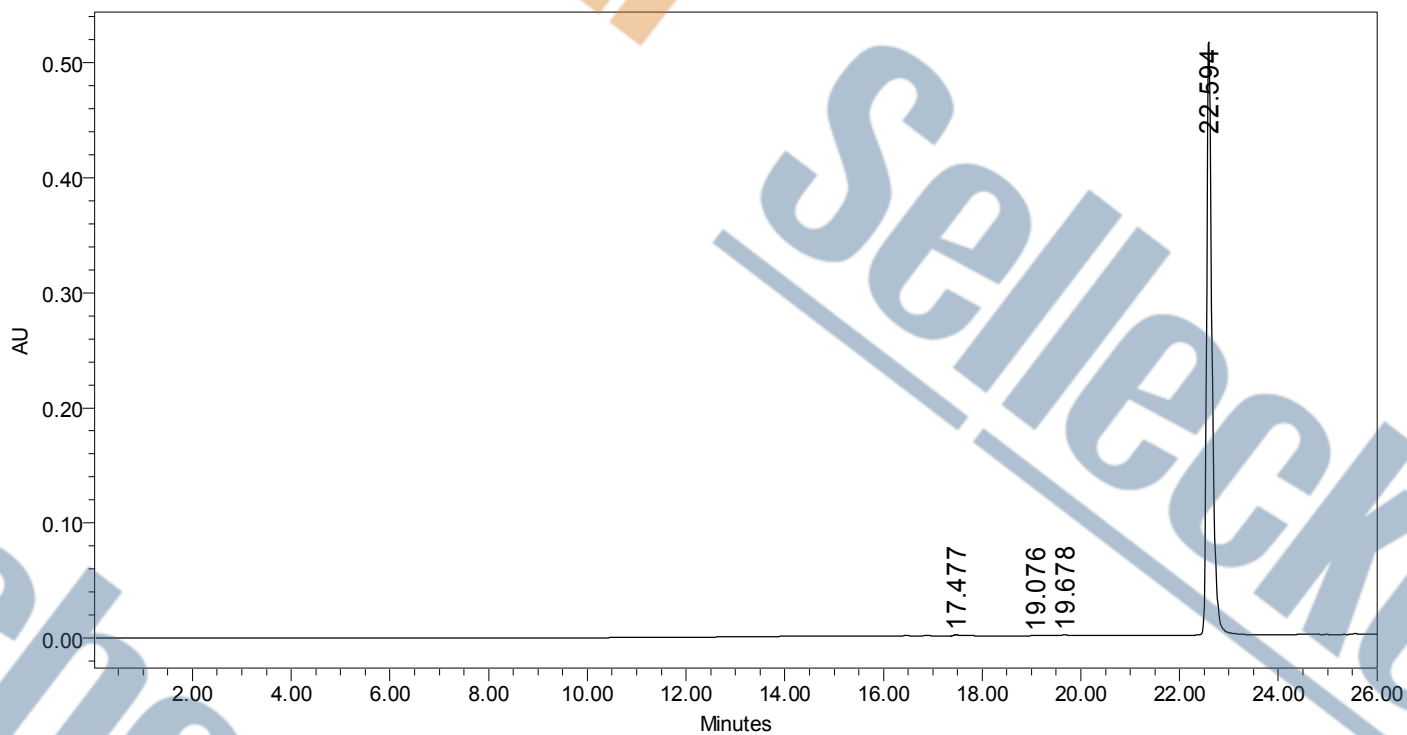

|   | RT     | Area    | % Area | Height |
|---|--------|---------|--------|--------|
| 1 | 17.477 | 6295    | 0.16   | 928    |
| 2 | 19.076 | 2264    | 0.06   | 283    |
| 3 | 19.678 | 7541    | 0.19   | 899    |
| 4 | 22.594 | 3959405 | 99.60  | 516376 |

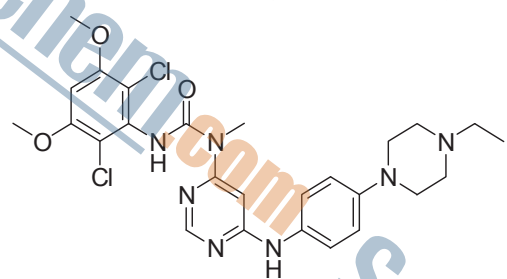

S218306, DMSO-d6

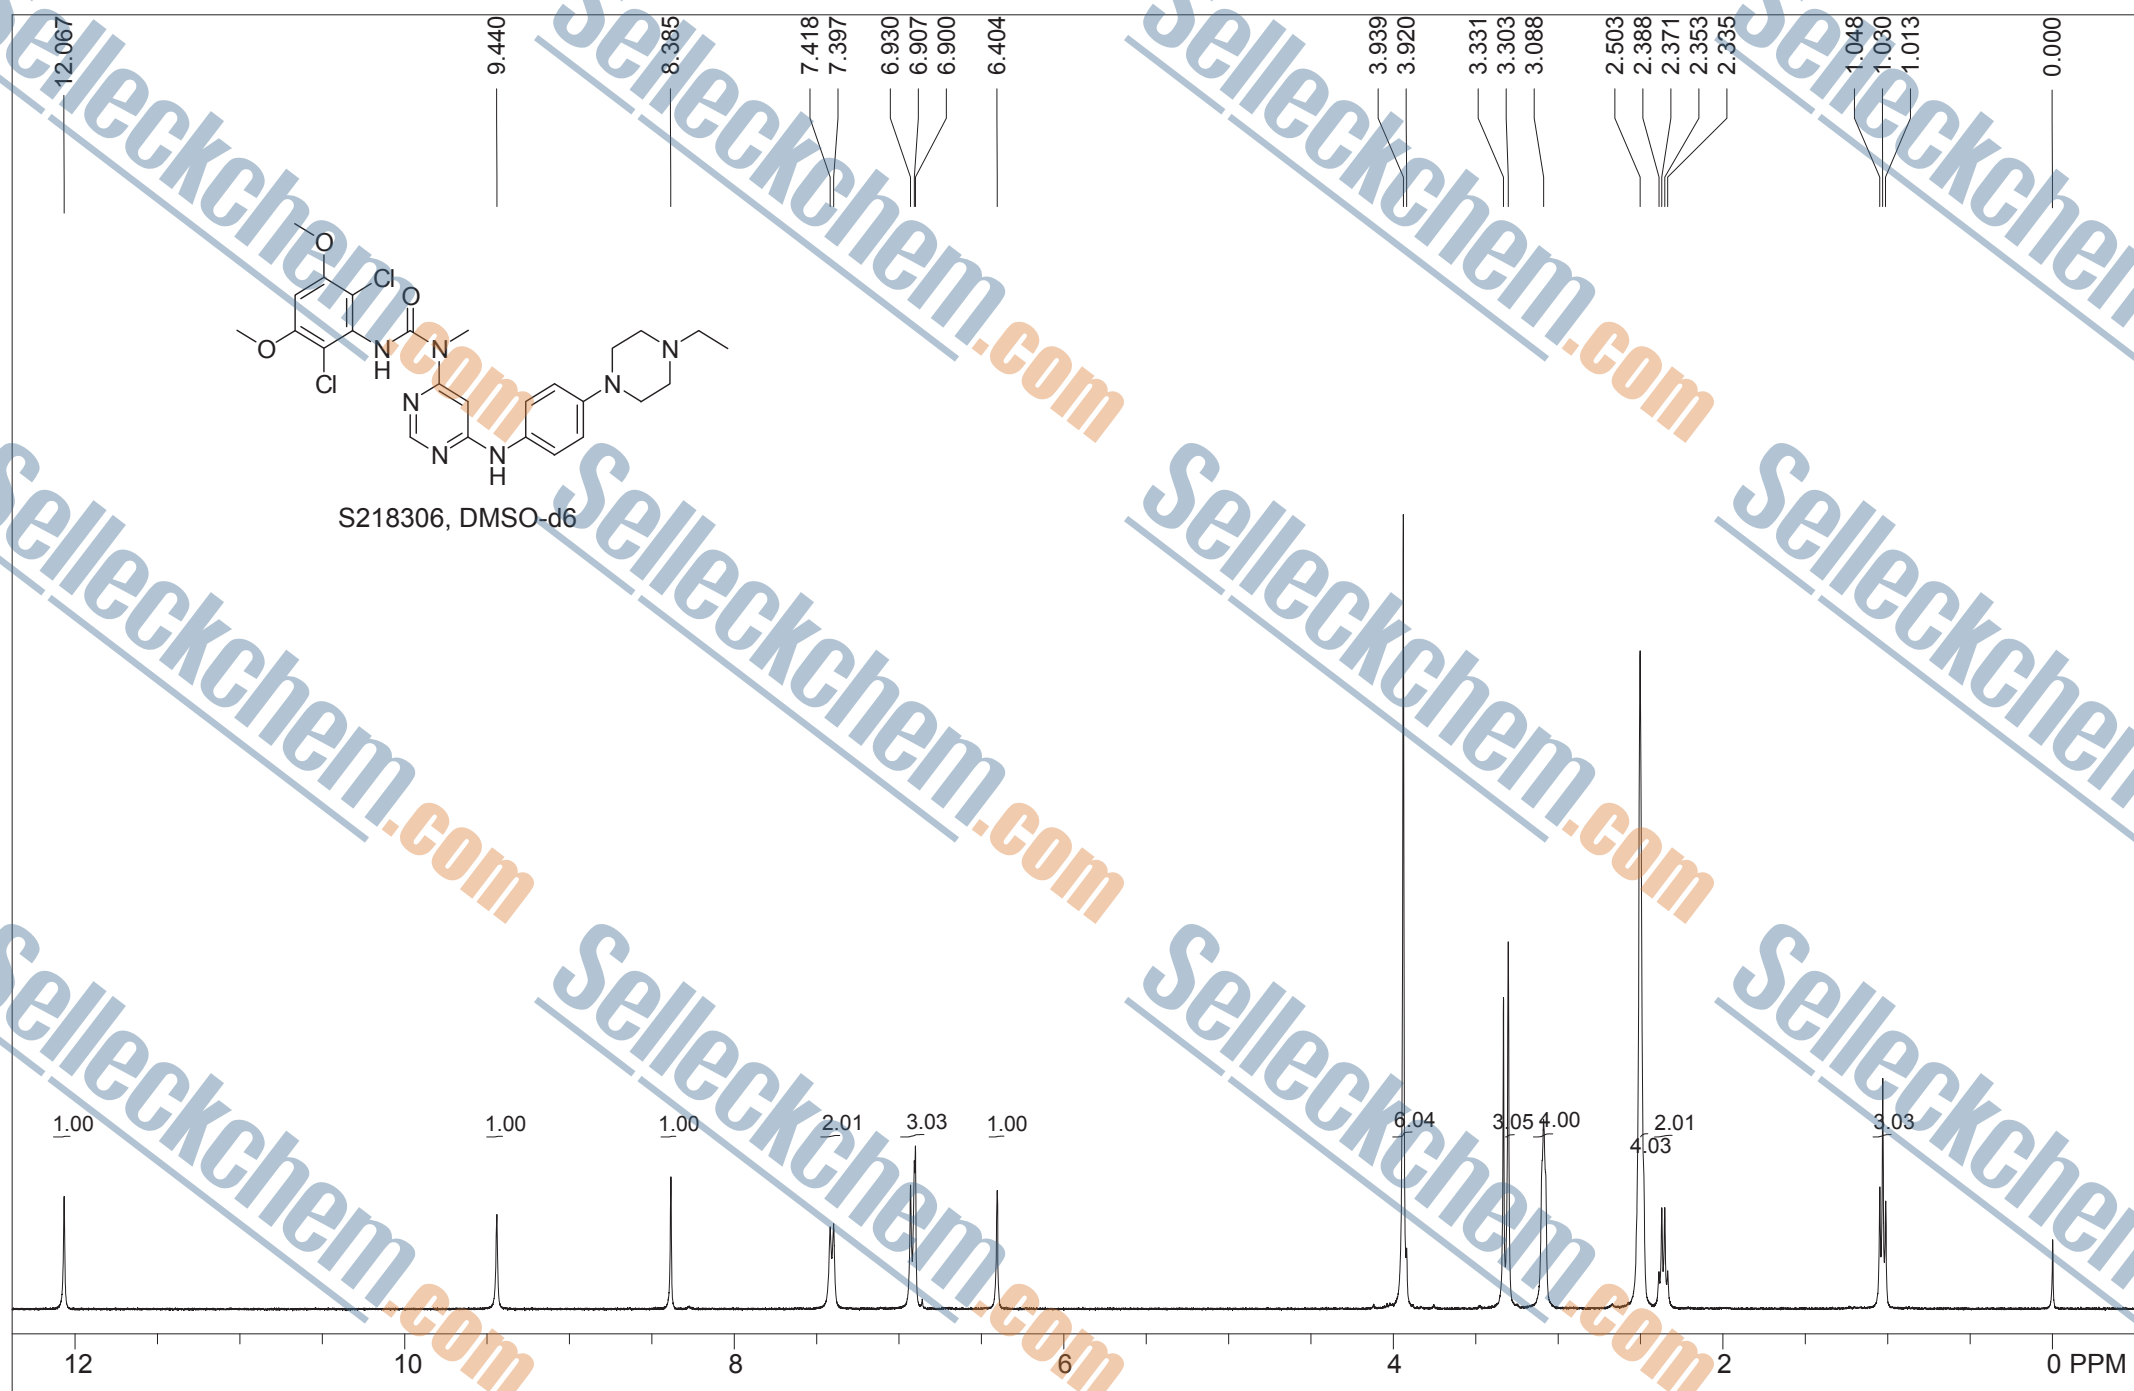

|                                                               |             |             |             |              |                                     |
|---------------------------------------------------------------|-------------|-------------|-------------|--------------|-------------------------------------|
| STANDARD PROTON PARAMETERSga;blank line;blank line;blank line |             |             |             |              |                                     |
| F1: 399.658                                                   | F2: 100.503 | SW1: 8803   | OF1: 3607.0 | PTS1d: 32768 | 32768                               |
| EX: s2pul                                                     | PW: 6.5 us  | PD: 1.0 sec | NA: 8       | LB: 0.0      | Nuts - SS218306 BGI398 (NVP-BGI398) |

Acq. Operator : SYSTEM  
Acq. Instrument : 12601c

Seq. Line : 1  
Location : Vial 1

Inj Volume : 20.000 µl

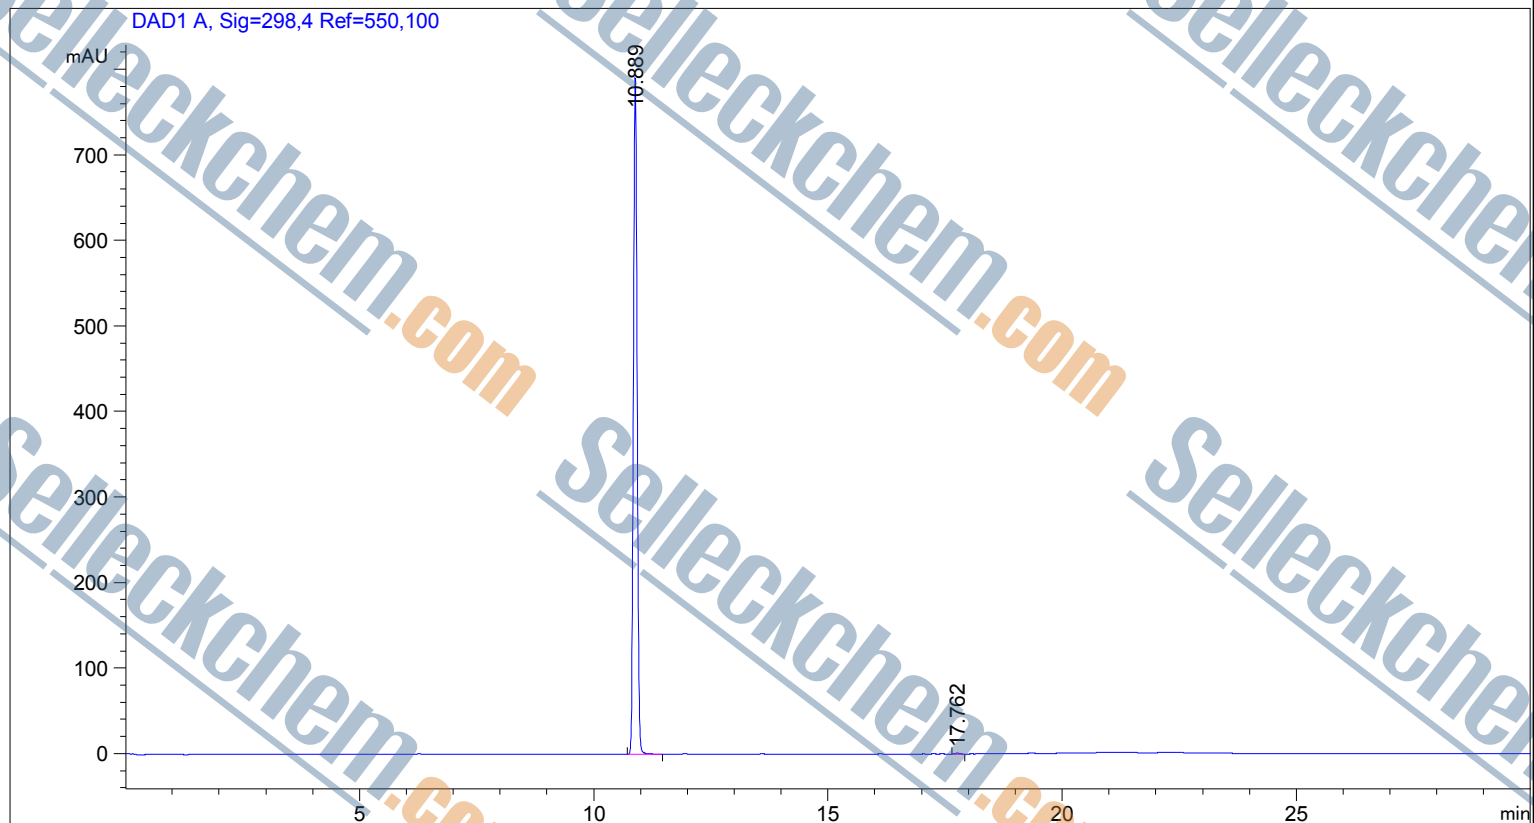

Area Percent Report

Sorted By : Signal  
Multiplier : 1.0000  
Dilution : 1.0000  
Use Multiplier & Dilution Factor with ISTDs

Signal 1: DAD1 A, Sig=298,4 Ref=550,100

| Peak #   | RetTime [min] | Type | Width [min] | Area [mAU*s] | Height [mAU] | Area %  |
|----------|---------------|------|-------------|--------------|--------------|---------|
| 1        | 10.889        | BB   | 0.0838      | 4336.02051   | 792.97778    | 99.8729 |
| 2        | 17.762        | BB   | 0.0756      | 5.52012      | 1.11781      | 0.1271  |
| Totals : |               |      |             | 4341.54063   | 794.09559    |         |

\*\*\* End of Report \*\*\*

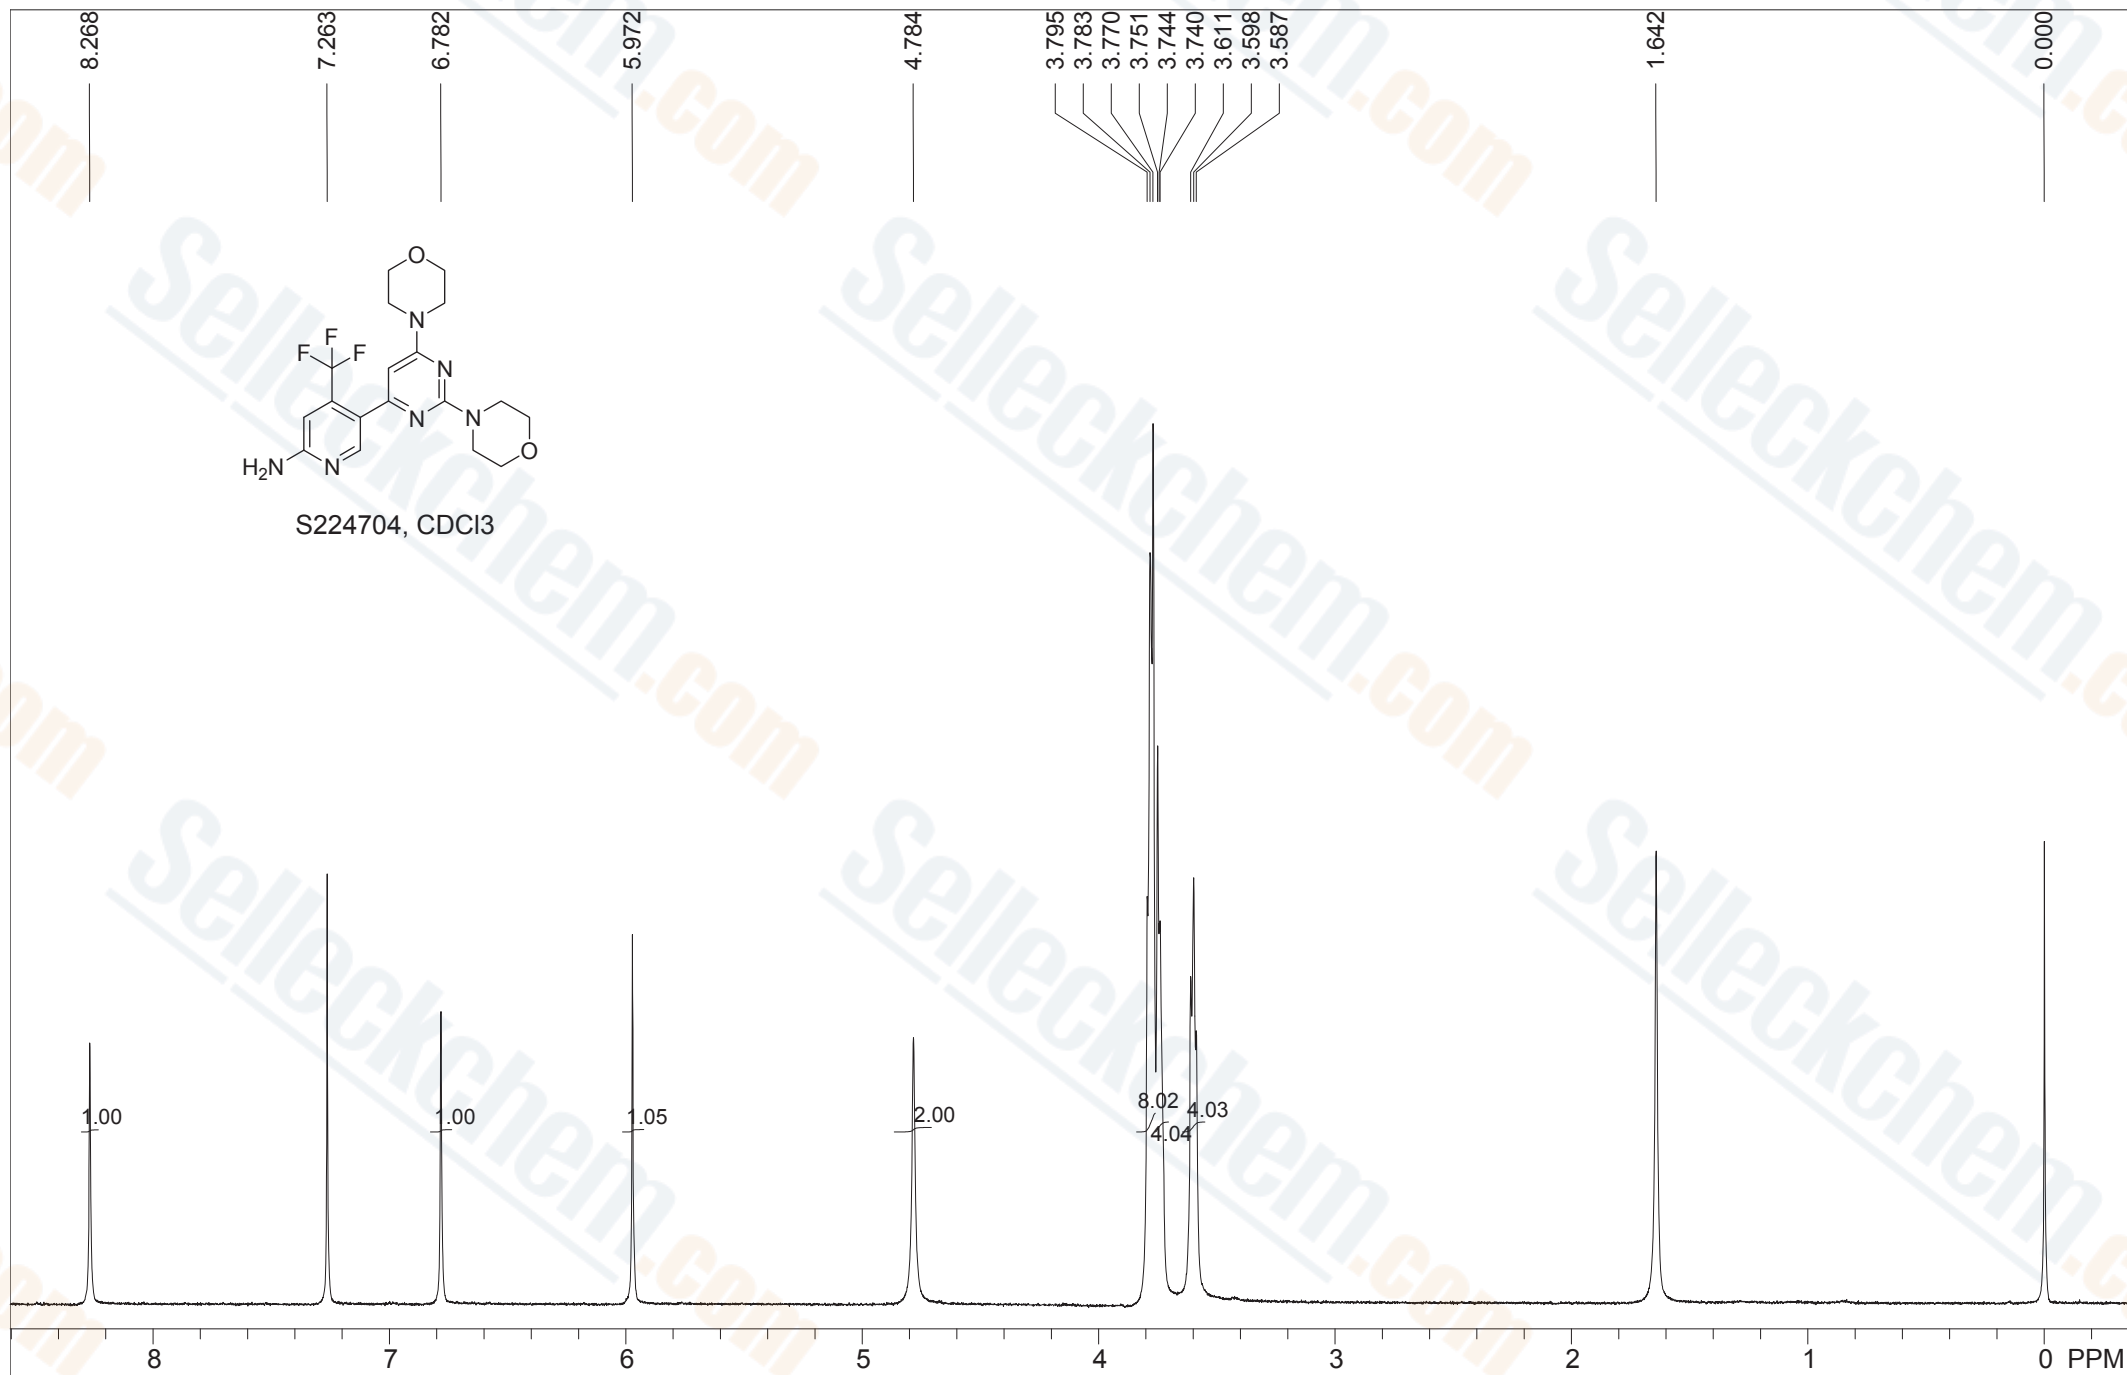

STANDARD PROTON PARAMETERS

|             |             |             |             |                      |
|-------------|-------------|-------------|-------------|----------------------|
| F1: 399.654 | F2: 100.502 | SW1: 6410   | OF1: 2402.2 | PTS1d: 16384 , 16384 |
| EX: s2pul   | PW: 6.5 us  | PD: 1.0 sec | NA: 8       | LB: 0.0              |

Nuts - \$S224704 BKM-120 CDCl<sub>3</sub>



# SAMPLE INFORMATION

Sample Name: F4043 S224704 BKM-120  
Sample Type:  
Viat: 1  
Injection #: 11  
Injection Volume: 20.00 ul  
Run Time: 30.0 Minutes  
Sample Set Name:

Acquirde By: System  
Acq. Method Set: Z  
Processing Method: 254  
Channel Name:  
Proc. Chnl. Descr: 254

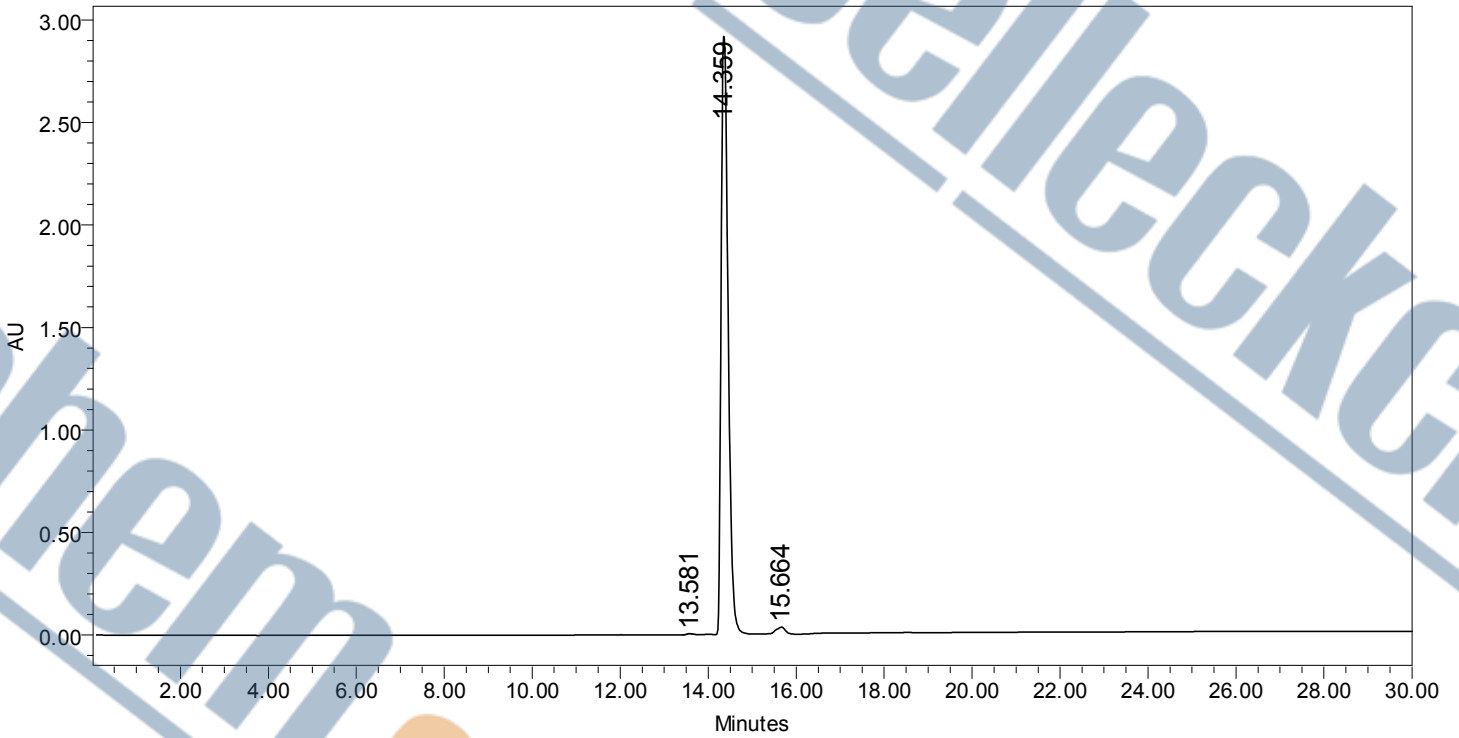

|   | RT     | Area     | Height  | % Area |
|---|--------|----------|---------|--------|
| 1 | 13.581 | 50964    | 5619    | 0.16   |
| 2 | 14.359 | 32279847 | 2938246 | 99.09  |
| 3 | 15.664 | 277382   | 30300   | 0.75   |

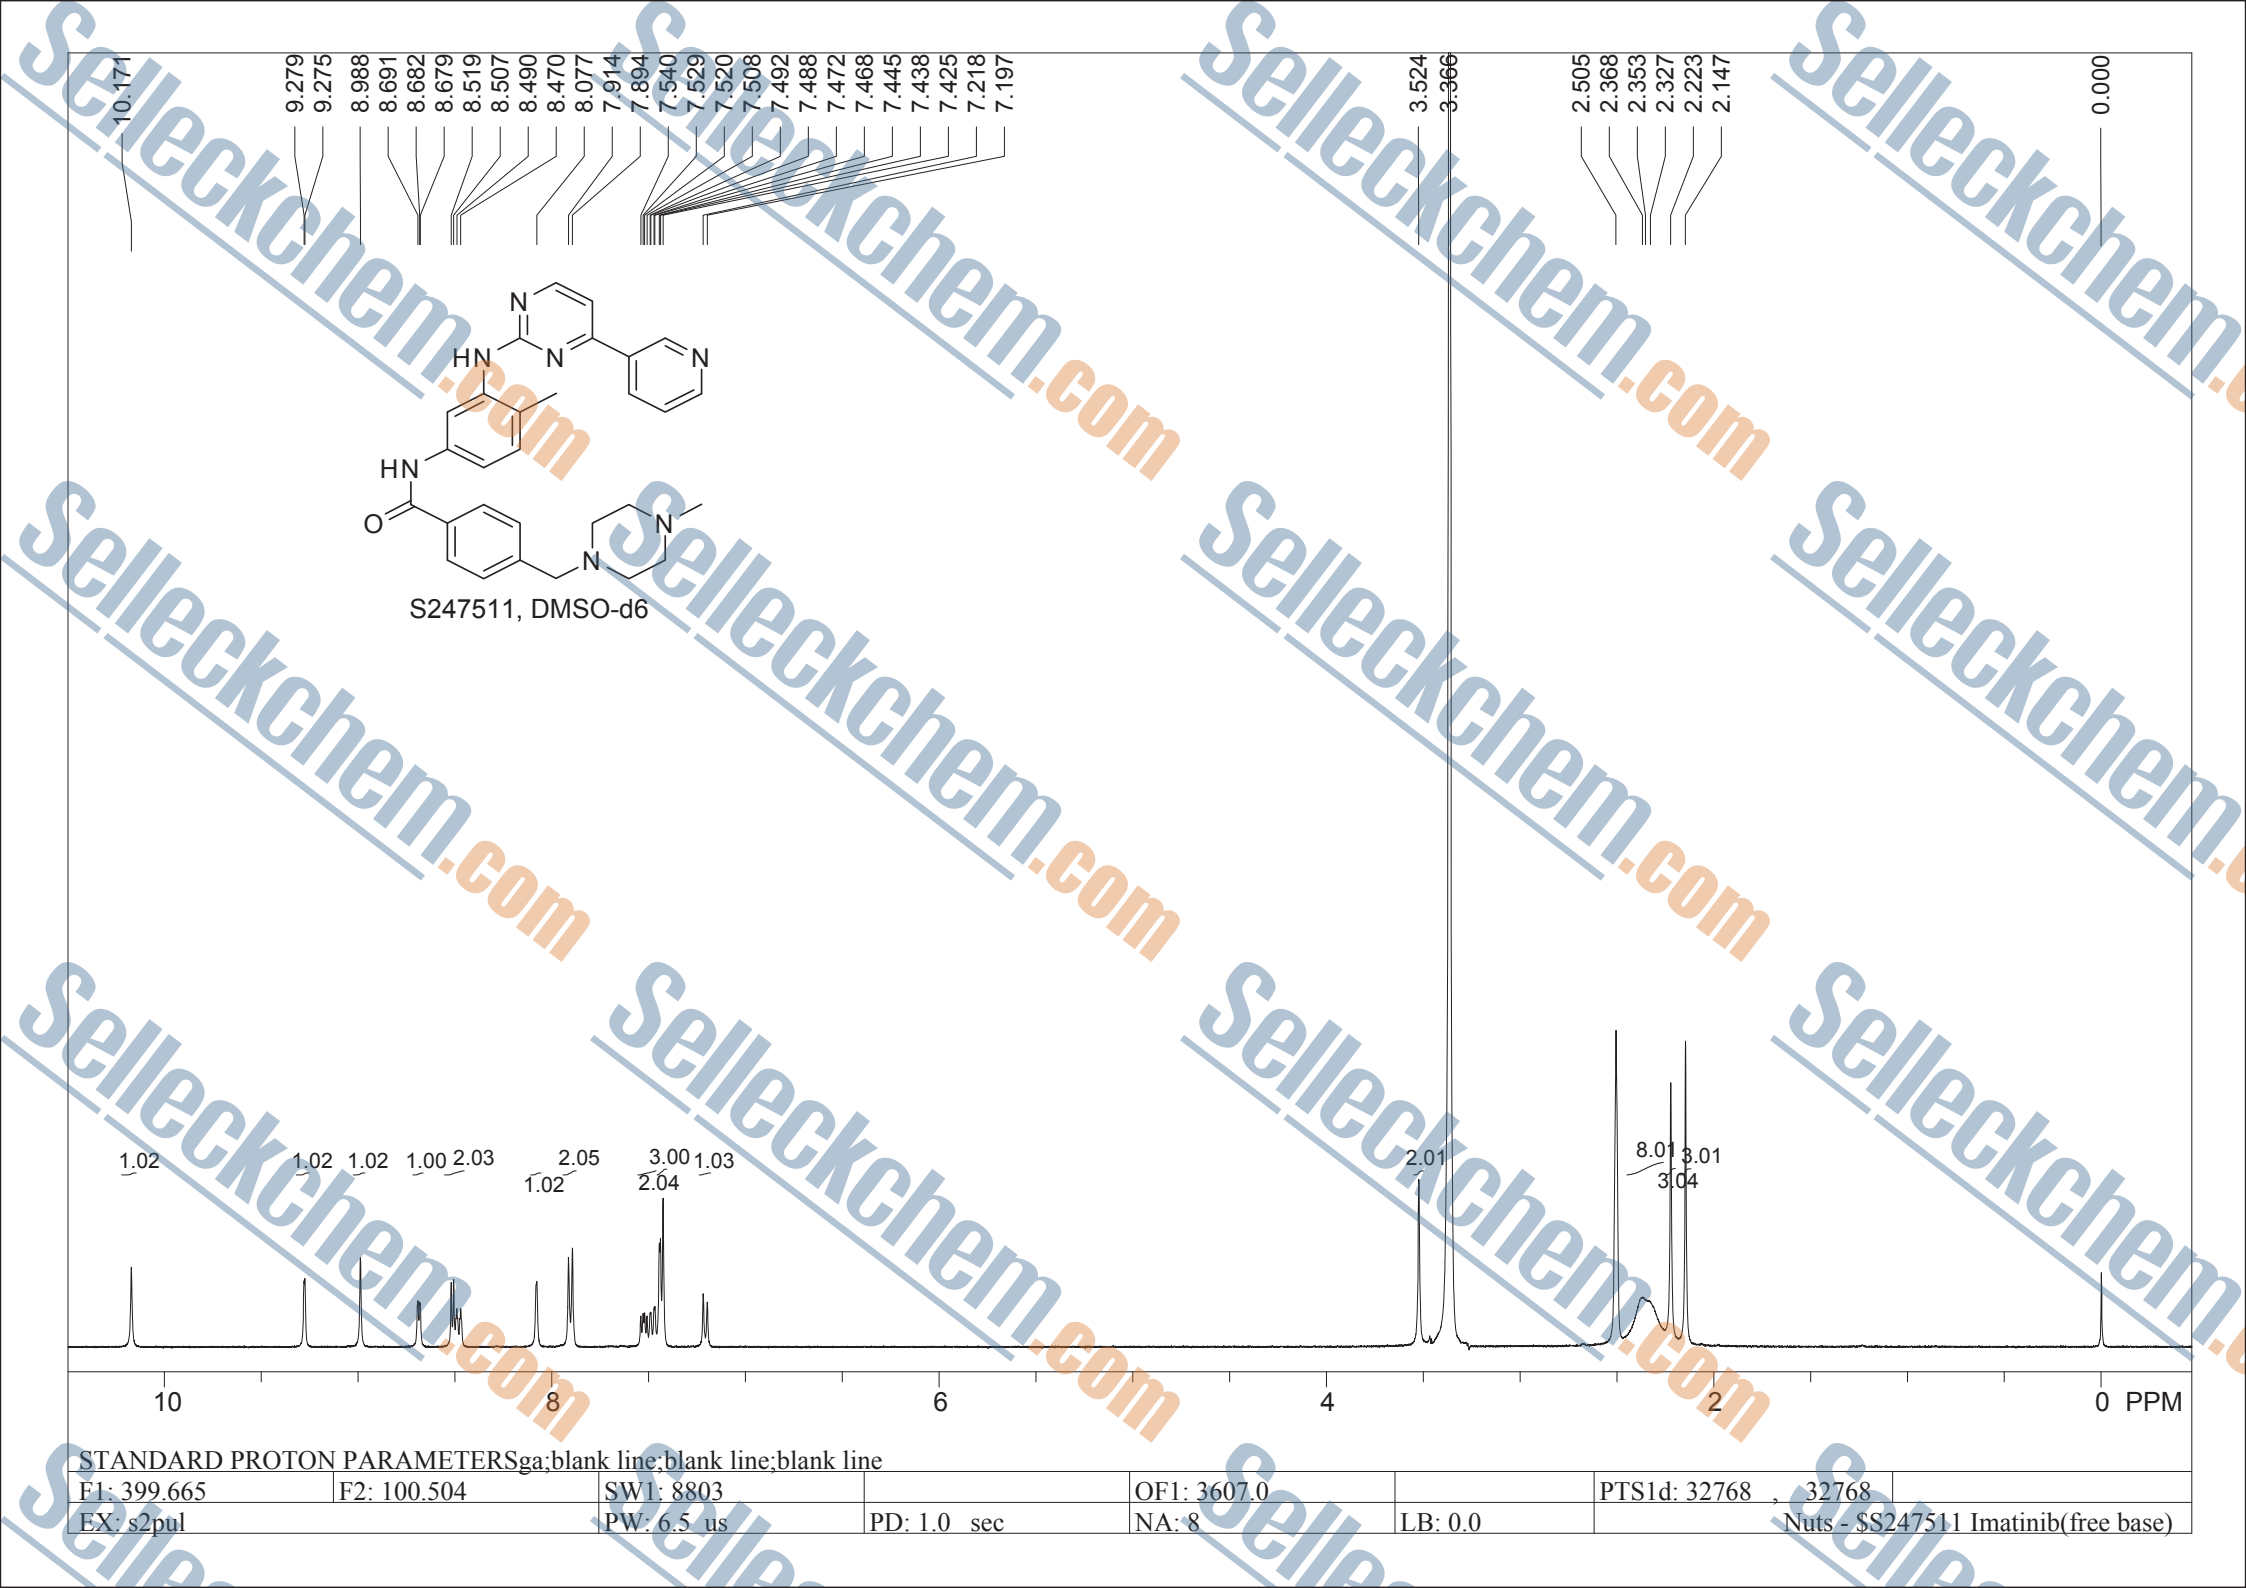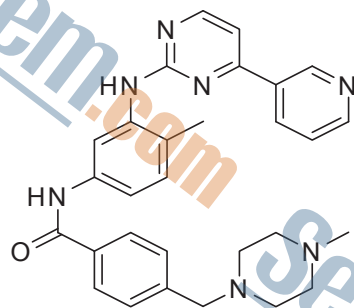

S247511, DMSO-d6

10.171  
9.279  
9.275  
8.988  
8.691  
8.682  
8.679  
8.519  
8.507  
8.490  
8.470  
8.077  
7.914  
7.894  
7.540  
7.529  
7.520  
7.508  
7.492  
7.488  
7.472  
7.468  
7.445  
7.438  
7.425  
7.218  
7.197

3.524  
3.366  
2.505  
2.368  
2.353  
2.327  
2.223  
2.147  
0.000

1.02  
1.02  
1.02  
1.00  
2.03  
2.05  
1.02  
3.00  
2.04  
1.03  
2.01  
8.01  
3.01  
3.04

10 8 6 4 2 0 PPM

|                                                               |             |             |             |              |                                     |
|---------------------------------------------------------------|-------------|-------------|-------------|--------------|-------------------------------------|
| STANDARD PROTON PARAMETERSga:blank line:blank line:blank line |             |             |             |              |                                     |
| F1: 399.665                                                   | F2: 100.504 | SW1: 8803   | OF1: 3607.0 | PTS1d: 32768 | 32768                               |
| EX: s2pul                                                     | PW: 6.5 us  | PD: 1.0 sec | NA: 8       | LB: 0.0      | Nuts - SS247511 Imatinib(free base) |

Acq. Operator : SYSTEM  
Acq. Instrument : 12601c

Seq. Line : 4  
Location : Vial 99

Inj Volume : 2.000 µl

Additional Info : Peak(s) manually integrated

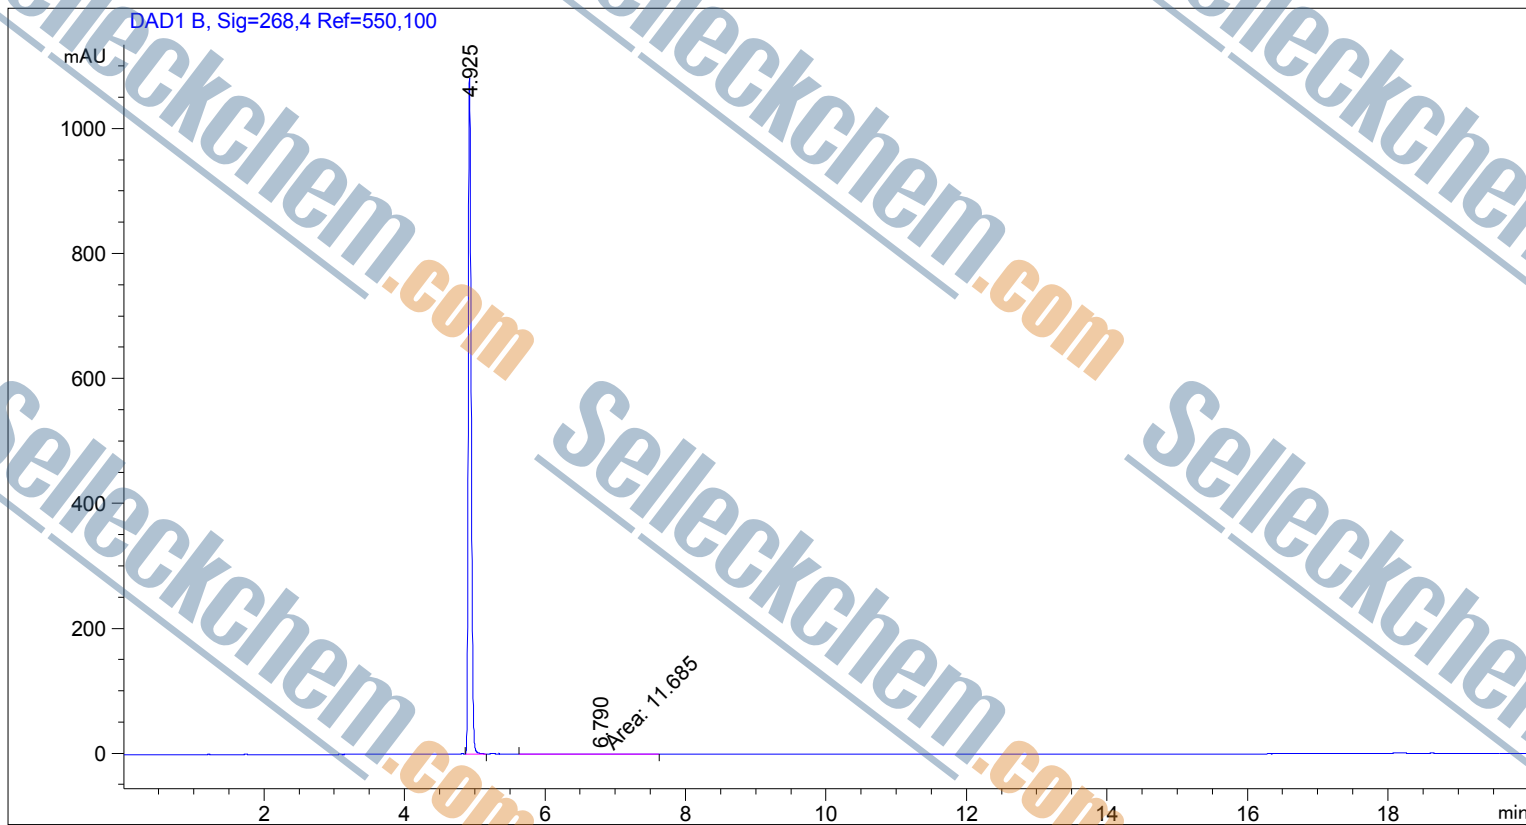

Area Percent Report

Sorted By : Signal  
Multiplier : 1.0000  
Dilution : 1.0000  
Use Multiplier & Dilution Factor with ISTDs

Signal 1: DAD1 B, Sig=268,4 Ref=550,100

| Peak # | RetTime [min] | Type | Width [min] | Area [mAU*s] | Height [mAU] | Area %  |
|--------|---------------|------|-------------|--------------|--------------|---------|
| 1      | 4.925         | VB   | 0.0443      | 3089.56934   | 1082.49927   | 99.6232 |
| 2      | 6.790         | MM   | 0.3738      | 11.68496     | 5.20961e-1   | 0.3768  |

Totals : 3101.25429 1083.02023

\*\*\* End of Report \*\*\*

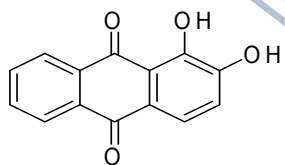

S252601, DMSO-d6

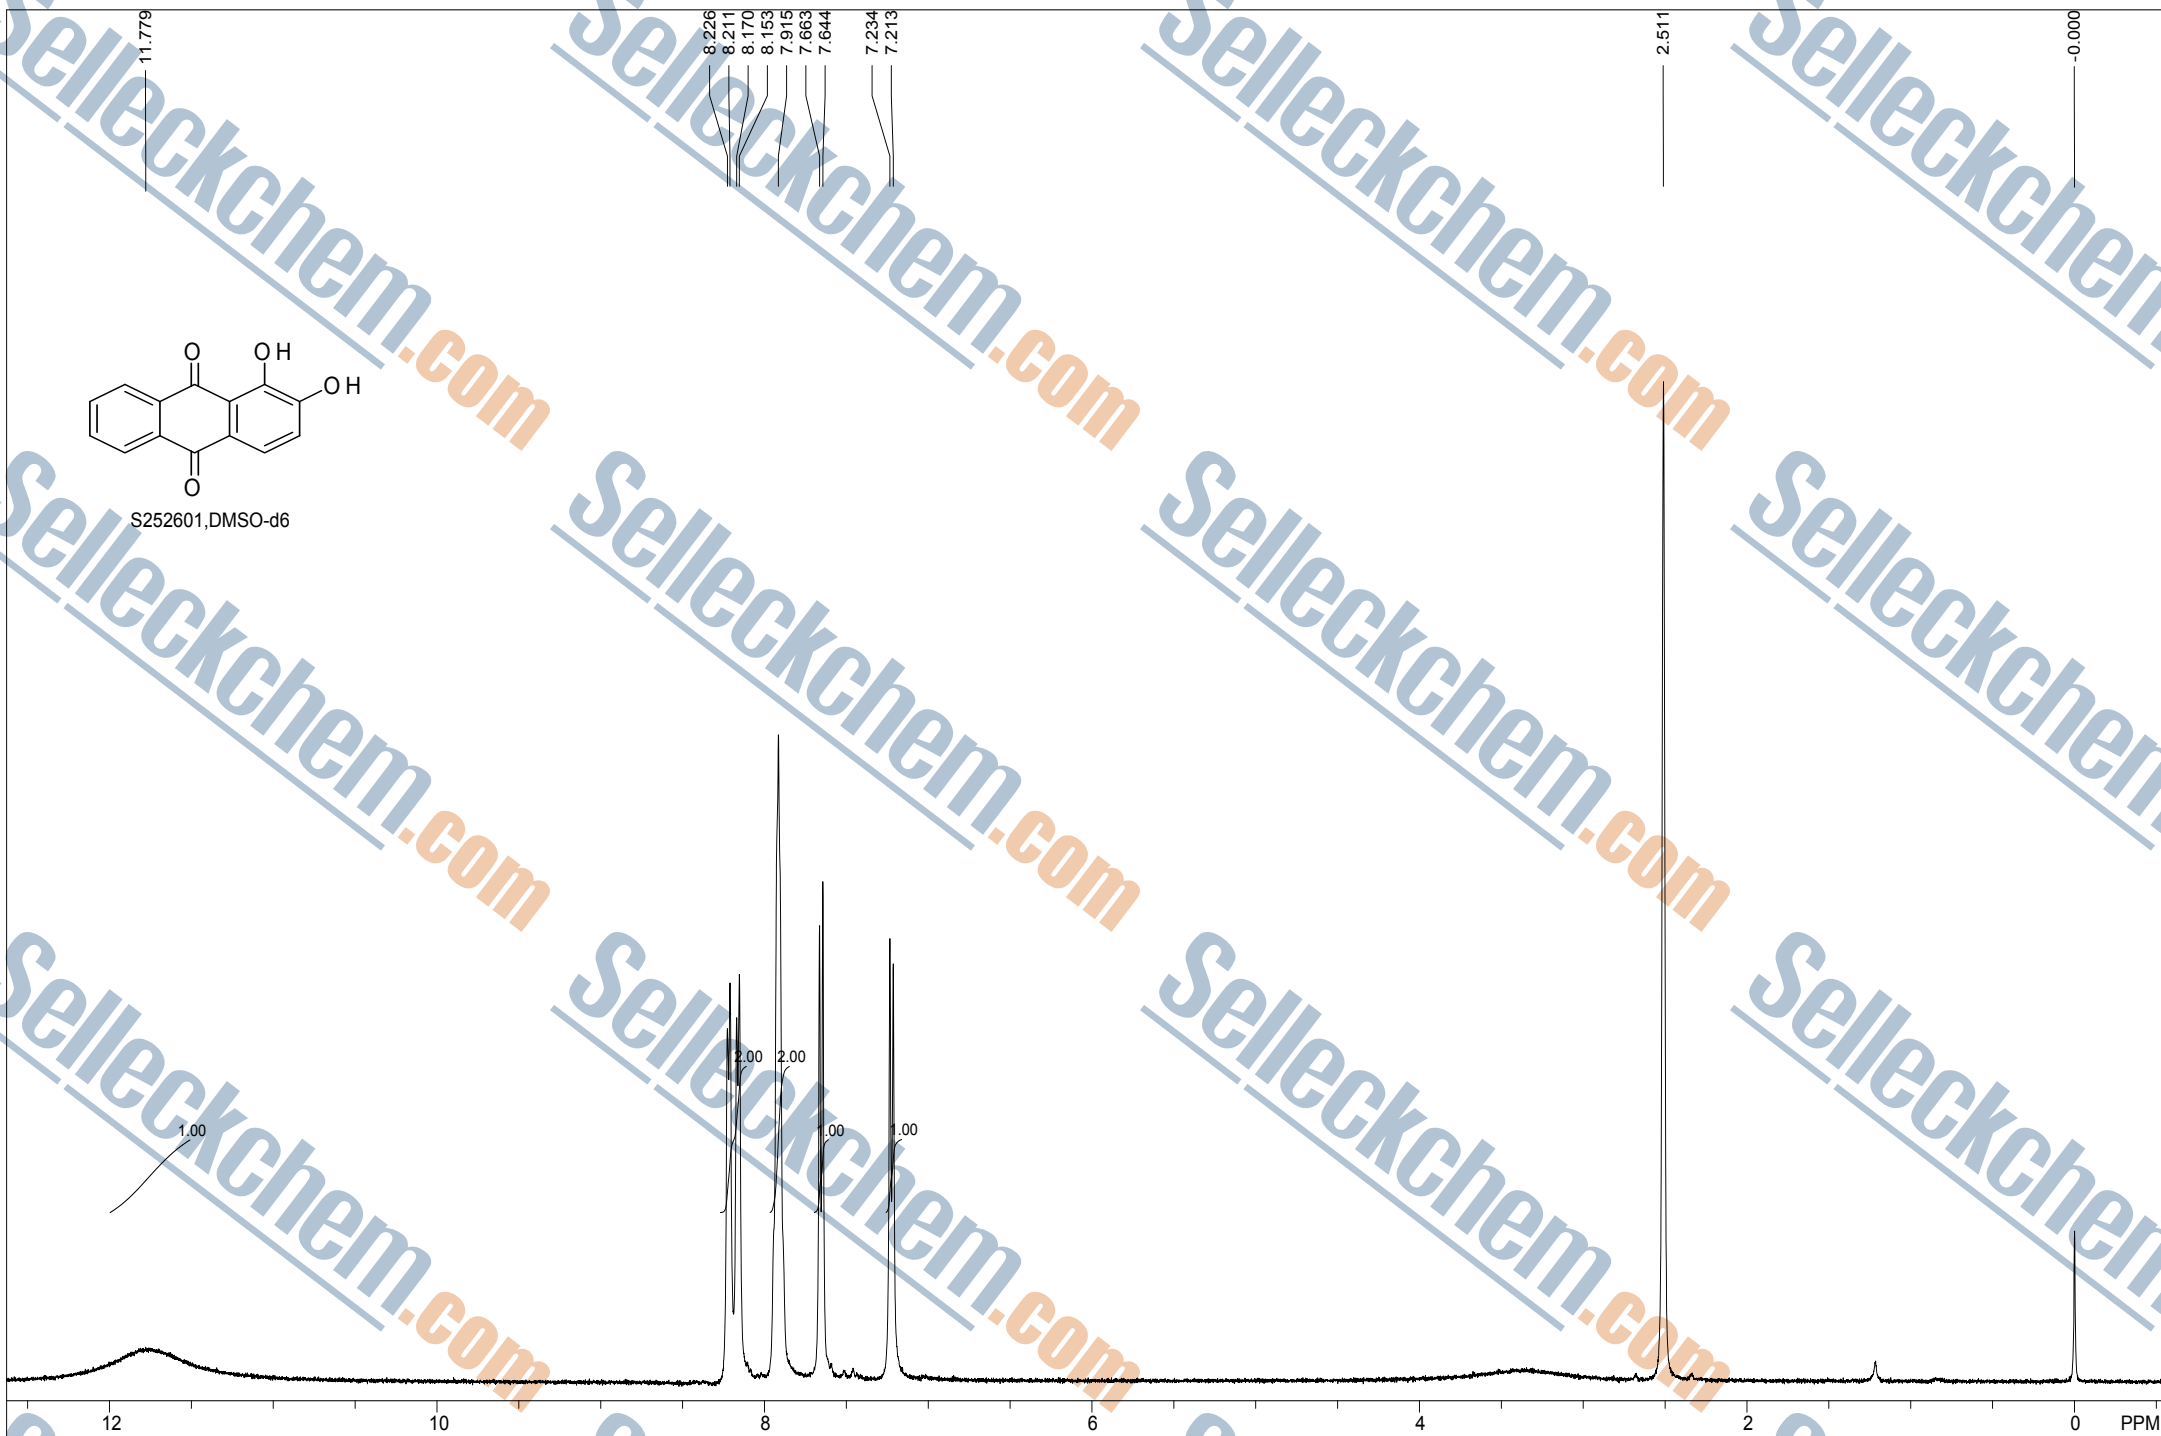

blank line proton: blank line

F1: 399.635

F2: 100.497

SW1: 7225

PW: 7.2 us

PD: 2.0 sec

OF1: 2810.0

NA: 8

LB: 0.0

PTS1d: 14803, 16384

Nuts - \$1

File D:\DATA\T28\CP-000B291-00095-HPLCA004.D

Sample Name : CP-000B291 Location : P1-D-09  
 Acq. Operator : HPLCA004 Inj : 0  
 Spec. Reported : MS Integration Inj Volume : 1 ul  
 Acq. Method : C:\Chem32\1\METHODS\2-HPLC-15MIN.M  
 Analysis Method : C:\Chem32\1\METHODS\2-HPLC-15MIN.M  
 Sample Info :  
 Method Info : Mobile Phase: A: water(0.01%TFA) B: ACN(0.01%TFA)  
 Gradient: 0min 5%B,3min 5%B,10min 95%B,15min 95%B  
 Flow Rate: 1.2 ml/min  
 Column: Eclipse XDB-C18,4.6\*150mm,5um  
 Oven Temperature: 40 C

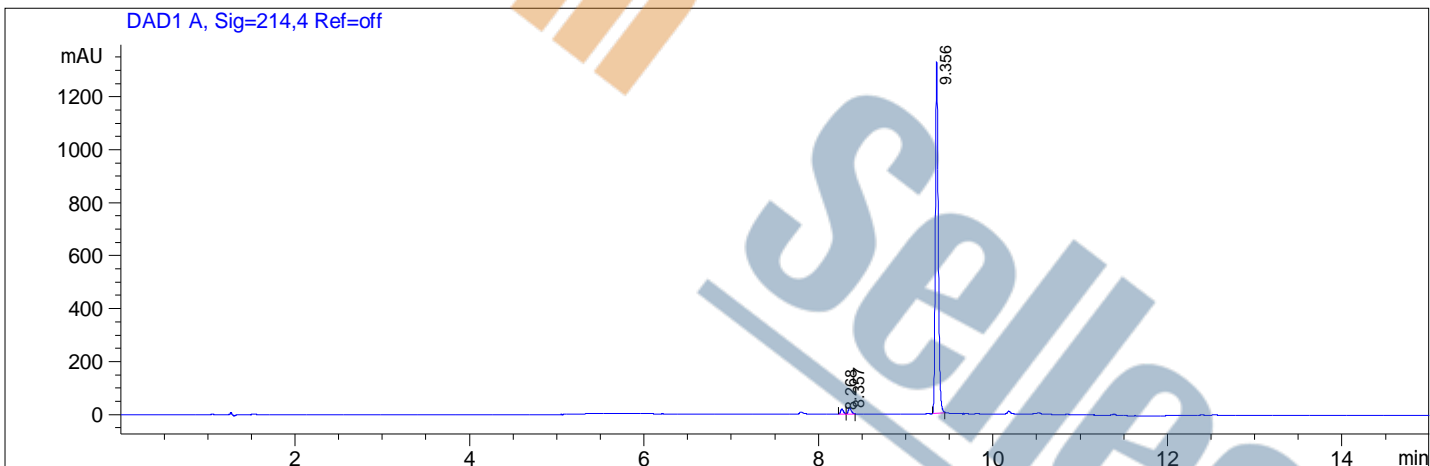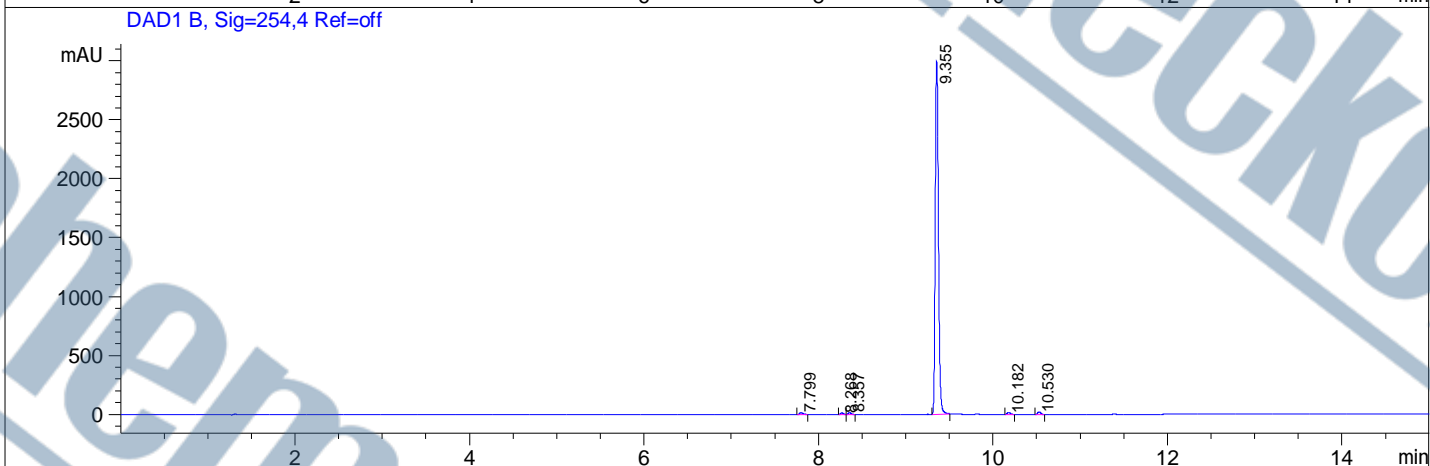

Integration Results for DAD1 A, Sig=214,4 Ref=off

| RetTim | Width | Area    | Height  | Area% |
|--------|-------|---------|---------|-------|
| 8.27   | 0.03  | 43.51   | 18.91   | 1.37  |
| 8.36   | 0.04  | 59.00   | 24.52   | 1.86  |
| 9.36   | 0.04  | 3074.40 | 1326.35 | 96.77 |

Integration Results for DAD1 B, Sig=254,4 Ref=off

| RetTim | Width | Area    | Height  | Area% |
|--------|-------|---------|---------|-------|
| 7.80   | 0.05  | 54.97   | 18.00   | 0.70  |
| 8.27   | 0.03  | 33.89   | 14.60   | 0.43  |
| 8.36   | 0.04  | 45.47   | 18.70   | 0.58  |
| 9.36   | 0.04  | 7673.82 | 2992.80 | 97.17 |
| 10.18  | 0.04  | 40.73   | 17.04   | 0.52  |
| 10.53  | 0.04  | 48.19   | 20.83   | 0.61  |

# SAMPLE INFORMATION

**Sample Name:** F1230 S262805 PKI-587  
**Sample Type:**  
**Vial:** 1  
**Injection #:** 2  
**Injection Volume:** 20.00 ul  
**Run Time:** 30.0 Minutes  
**Sample Set Name:**

**Acquire By:** System  
**Acq Method Set:** YZR  
**Processing Method:** 301  
**Channel Name:**  
**Proc. Chnl. Descr:** 301

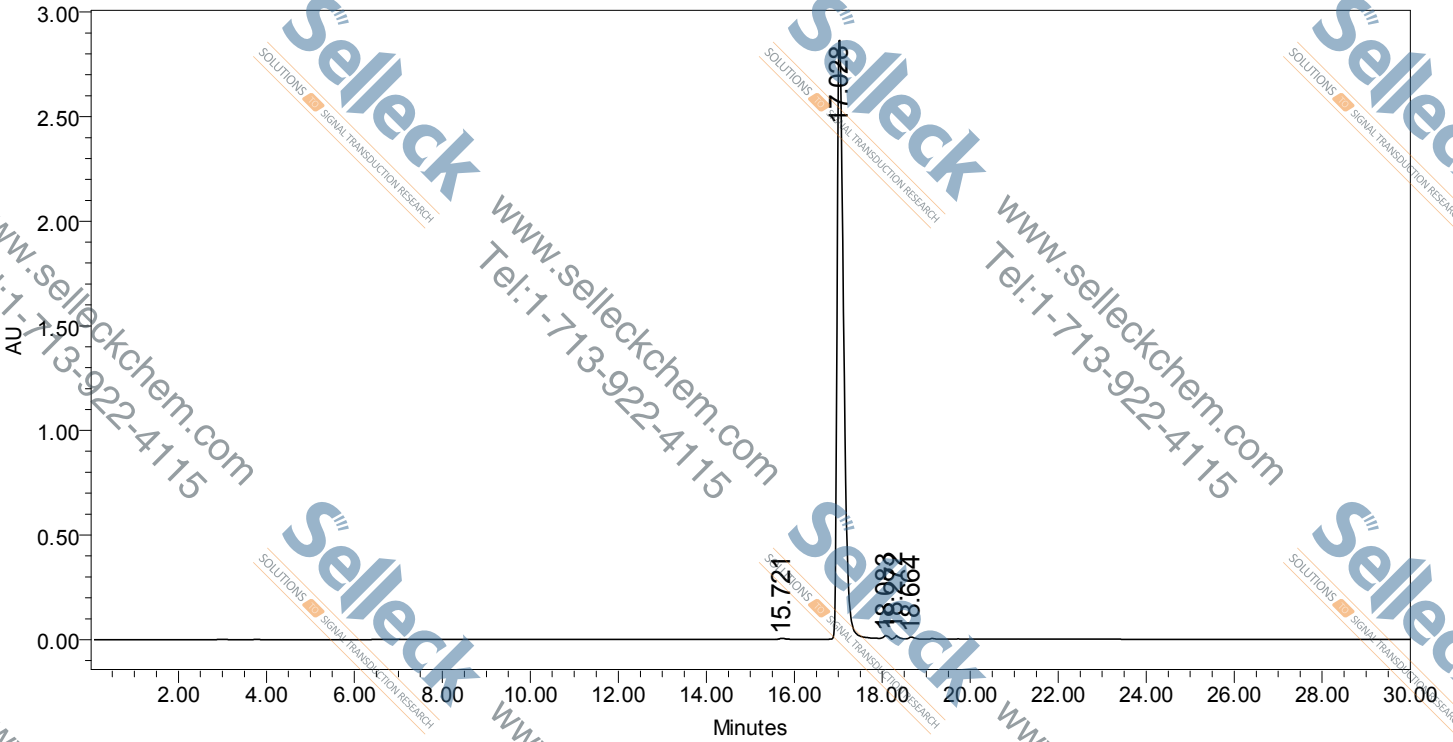

|   | RT     | Area     | Height  | % Area |
|---|--------|----------|---------|--------|
| 1 | 15.721 | 42224    | 4759    | 0.14   |
| 2 | 17.028 | 29783931 | 2870679 | 99.01  |
| 3 | 18.083 | 97990    | 13508   | 0.33   |
| 4 | 18.272 | 86804    | 19226   | 0.29   |
| 5 | 18.664 | 72710    | 9290    | 0.24   |

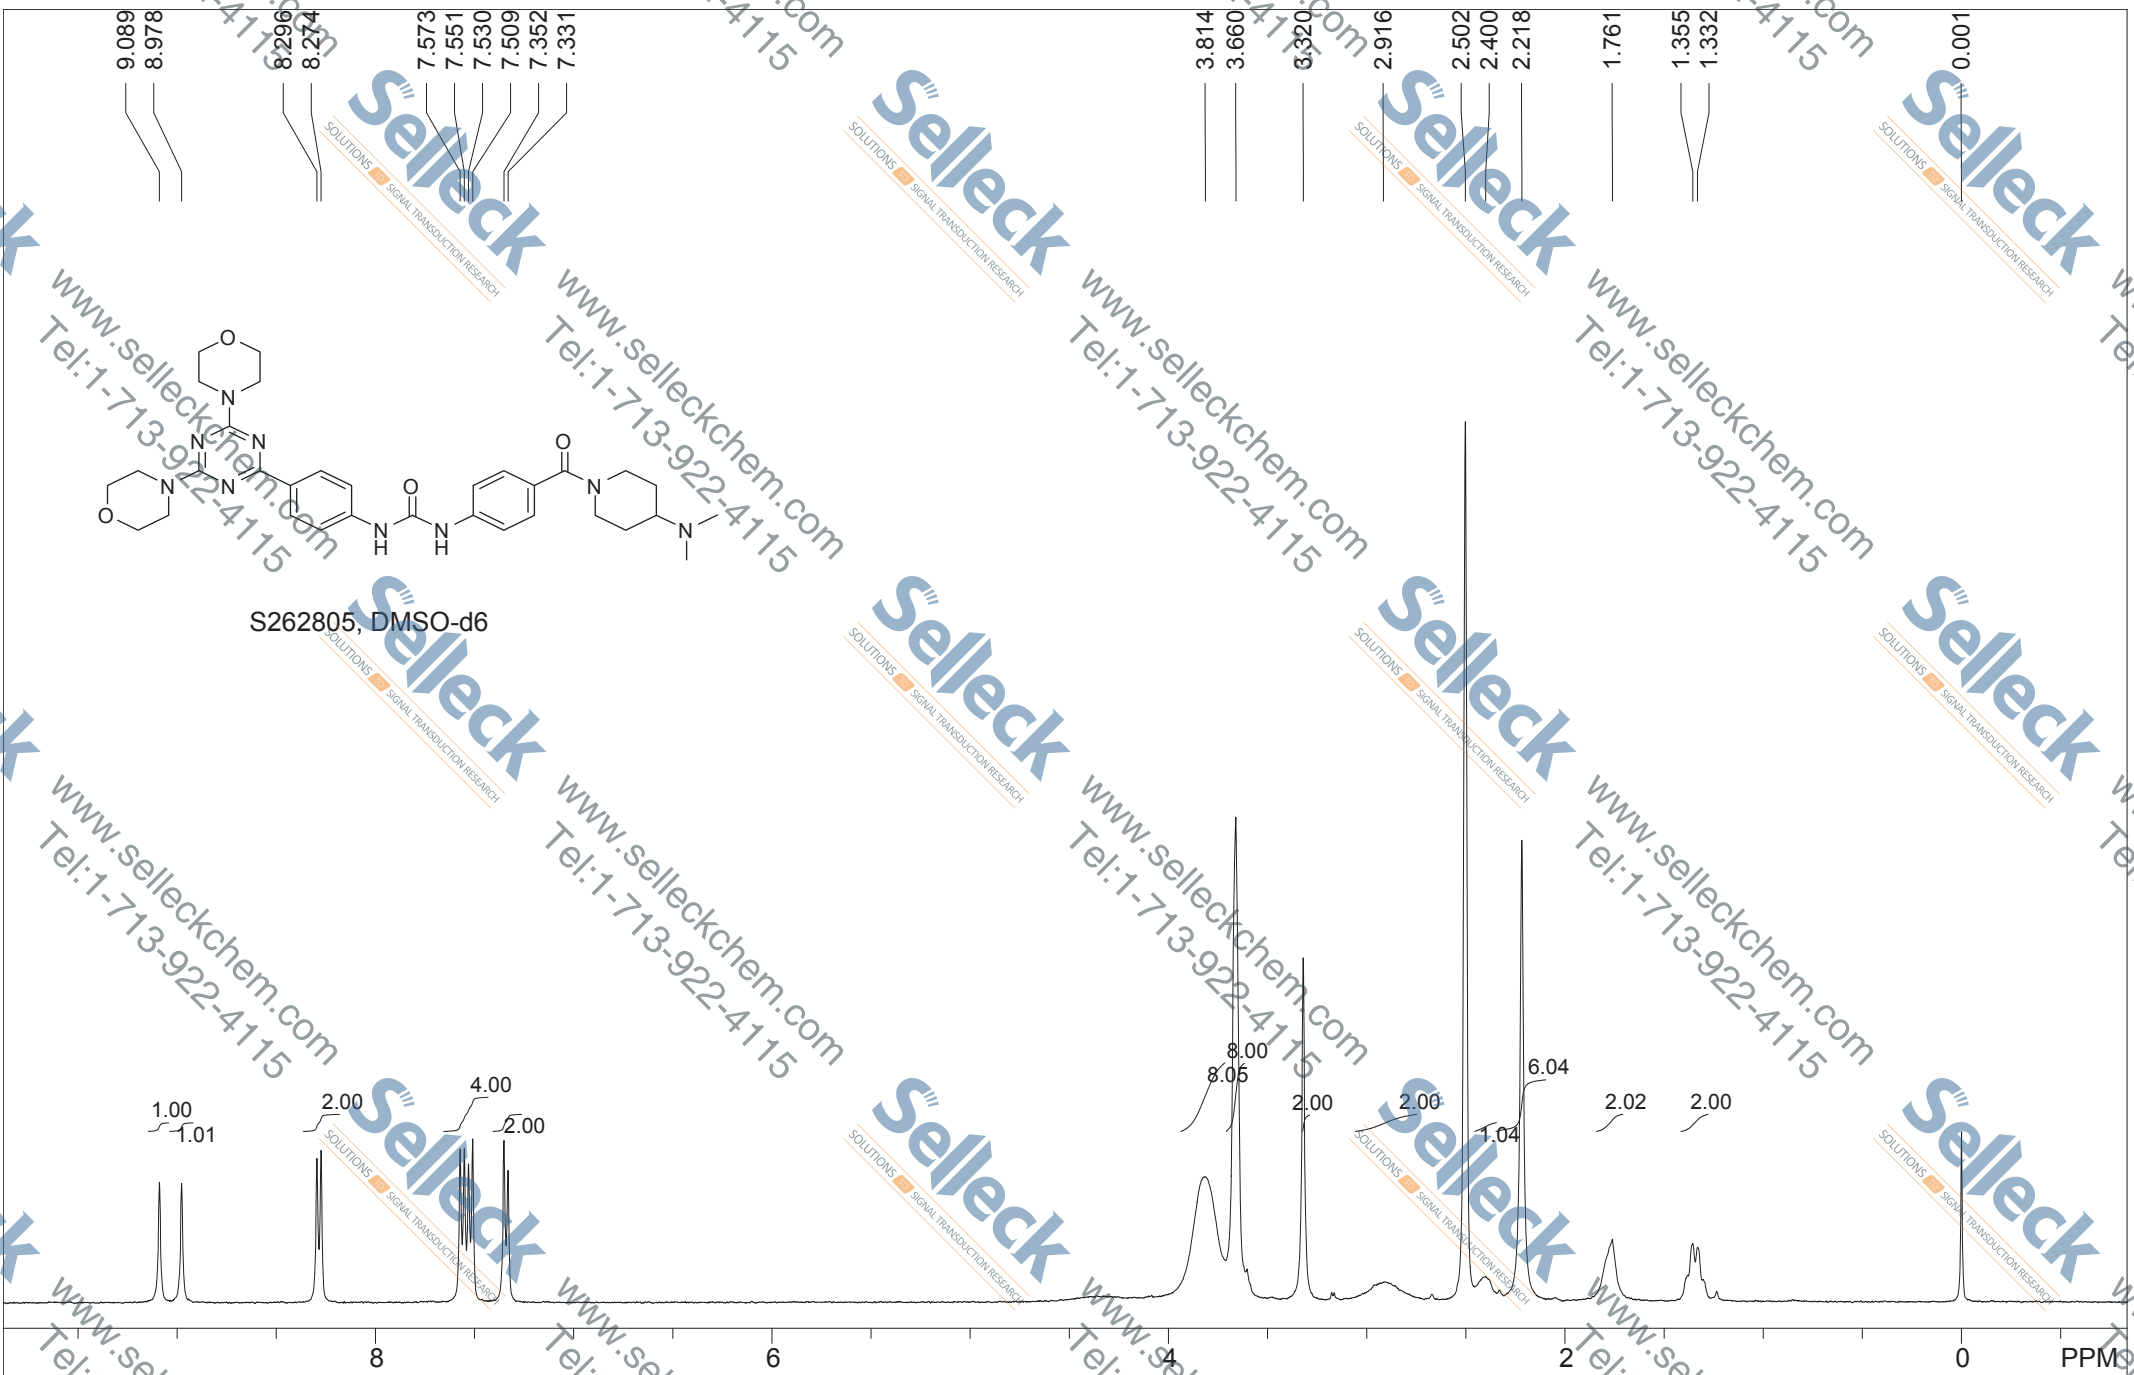

S262805, DMSO-d6

|                        |             |             |       |             |                        |              |       |
|------------------------|-------------|-------------|-------|-------------|------------------------|--------------|-------|
| Std proton: blank line |             |             |       |             |                        |              |       |
| F1: 399.636            | F2: 100.497 | SW1: 8803   |       | OF1: 3604.6 |                        | PTS1d: 18035 | 32768 |
| EX: s2pul              | PW: 7.2 us  | PD: 2.0 sec | NA: 8 | LB: 1.0     | Nuts - S262805 PKI-587 |              |       |

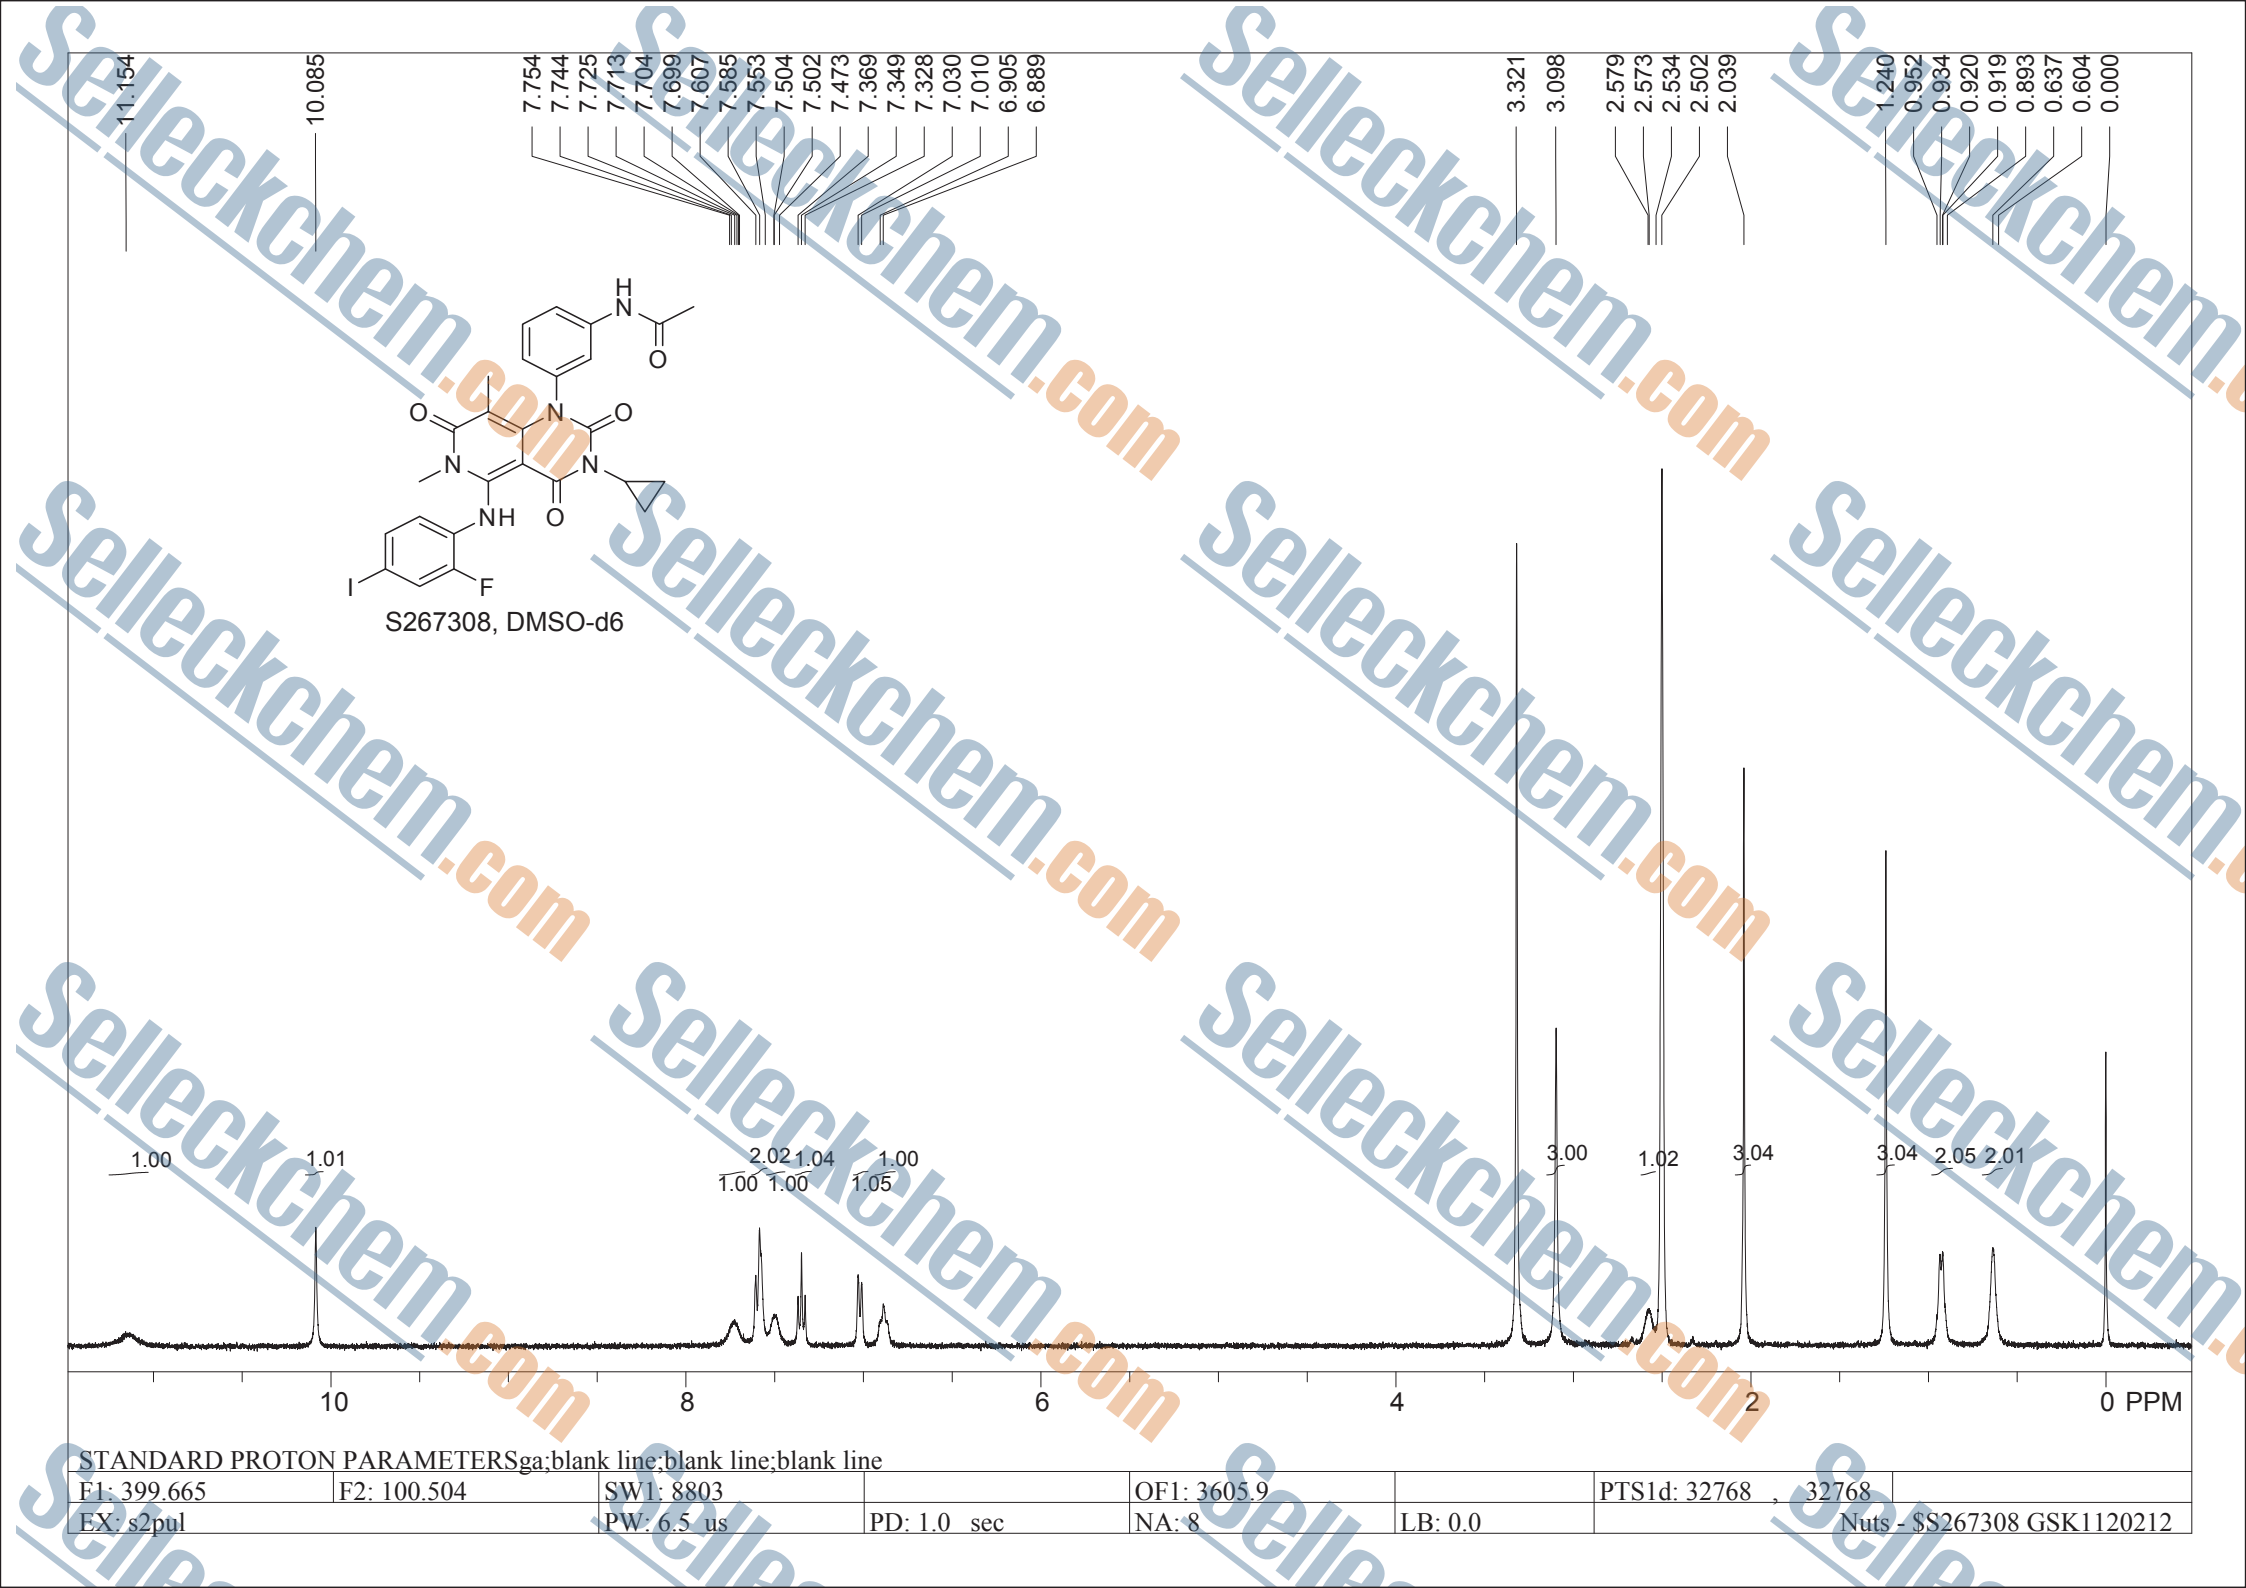

STANDARD PROTON PARAMETERSga:blank line:blank line:blank line

|             |             |             |             |                      |
|-------------|-------------|-------------|-------------|----------------------|
| F1: 399.665 | F2: 100.504 | SW1: 8803   | OF1: 3605.9 | PTS1d: 32768 , 32768 |
| EX: s2pul   | PW: 6.5 us  | PD: 1.0 sec | NA: 8       | LB: 0.0              |

Nuts - \$S267308 GSK1120212





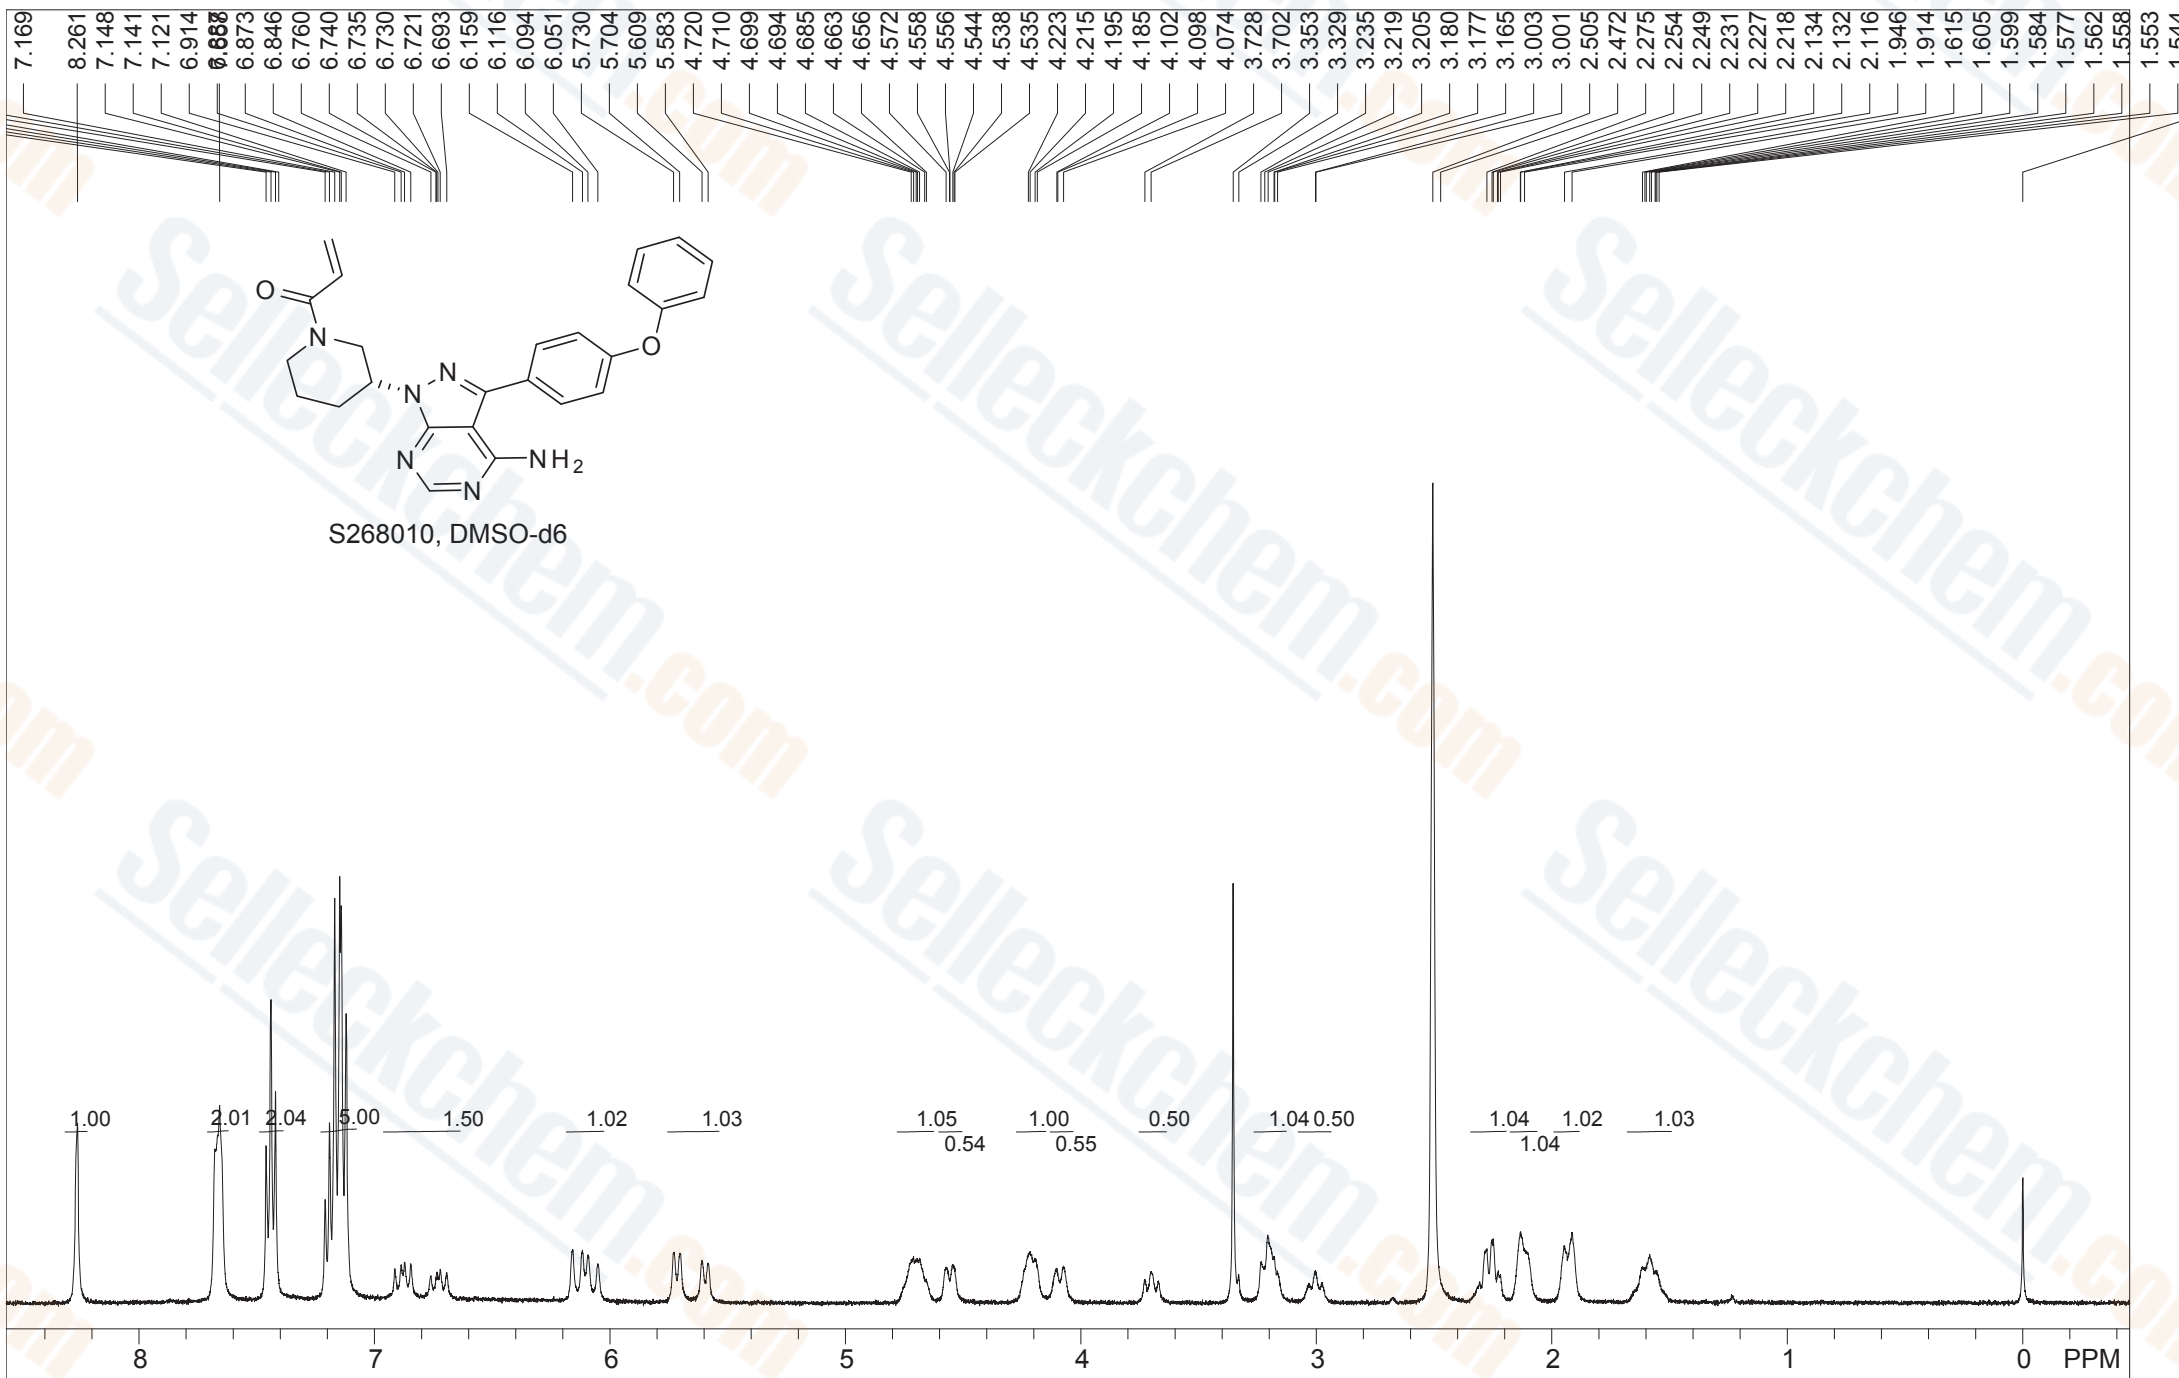

STANDARD PROTON PARAMETERS

|             |             |             |             |                      |
|-------------|-------------|-------------|-------------|----------------------|
| F1: 399.658 | F2: 100.503 | SW1: 8803   | OF1: 3608.6 | PTS1d: 32768 , 32768 |
| EX: s2pul   | PW: 6.5 us  | PD: 1.0 sec | NA: 8       | LB: 0.0              |

Nuts - \$S268010 PCI-32765

# SAMPLE INFORMATION

Sample Name: F4526 S268010 PCI-32765      Acquire By: System  
Sample Type:      Acq. Method Set: Z  
Viat: 1      Processing Method: 257  
Injection #: 5      Channel Name:  
Injection Volume: 20.00 ul      Proc. Chnl. Descr: 257  
Run Time: 30.0 Minutes  
Sample Set Name:

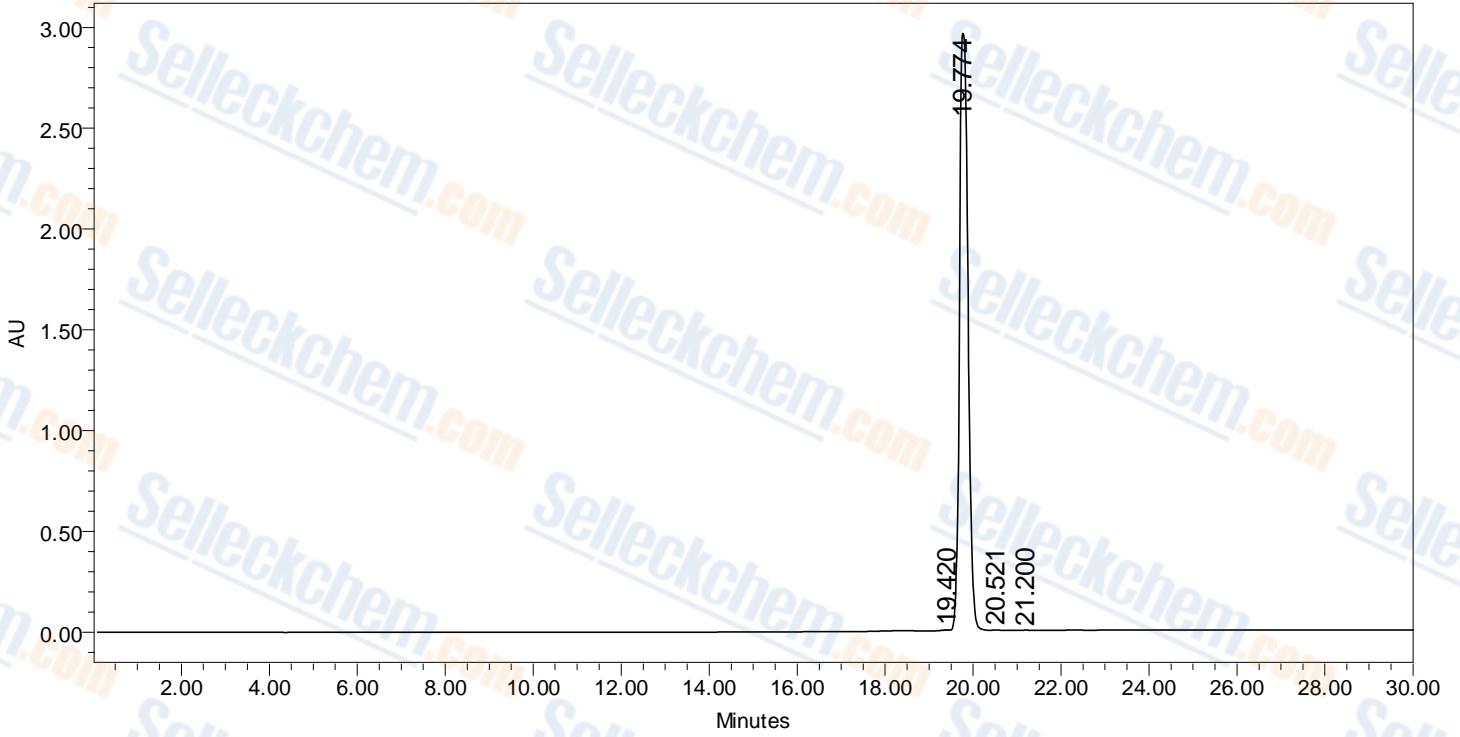

|   | RT     | Area     | Height  | % Area |
|---|--------|----------|---------|--------|
| 1 | 19.420 | 33525    | 3169    | 0.08   |
| 2 | 19.774 | 39830048 | 2970885 | 99.82  |
| 3 | 20.521 | 18195    | 2325    | 0.05   |
| 4 | 21.200 | 18293    | 1536    | 0.05   |

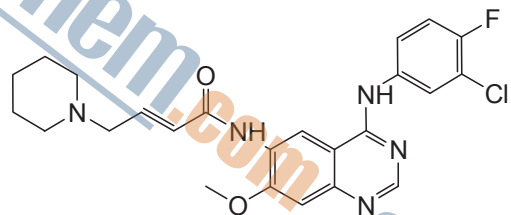

S272704, DMSO-d6

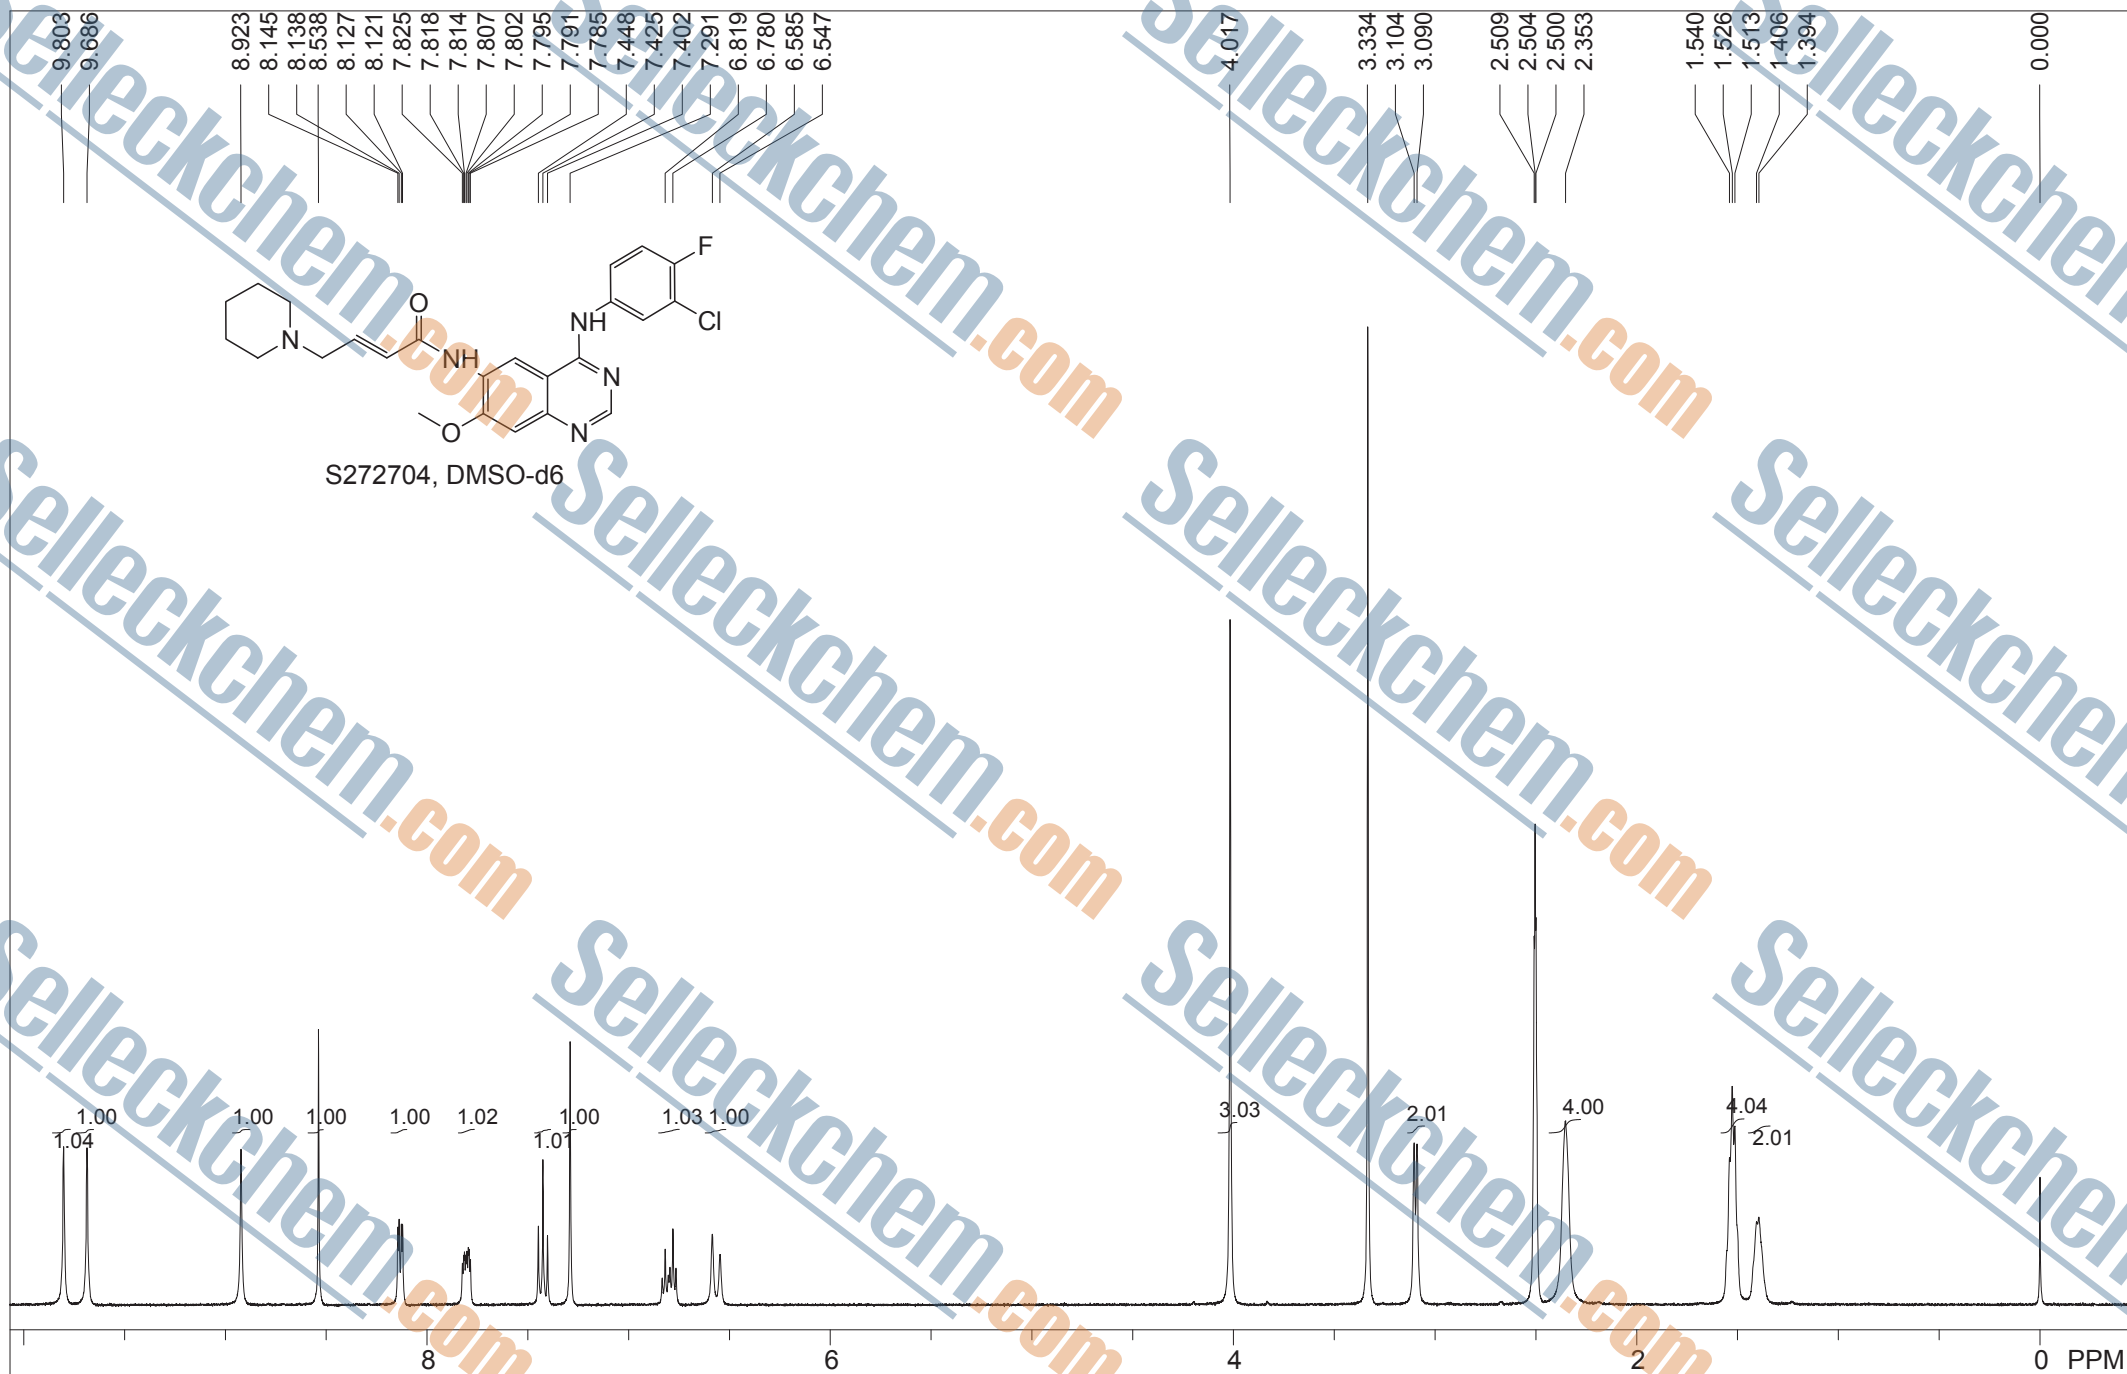

STANDARD PROTON PARAMETERSga;blank line;blank line;blank line

|             |             |             |             |                      |
|-------------|-------------|-------------|-------------|----------------------|
| F1: 399.665 | F2: 100.504 | SW1: 8803   | OF1: 3606.7 | PTS1d: 32768 , 32768 |
| EX: s2pul   | PW: 6.5 us  | PD: 1.0 sec | NA: 8       | LB: 0.0              |

Nuts - \$\$S272704Dacomitinib (PF-00299804)



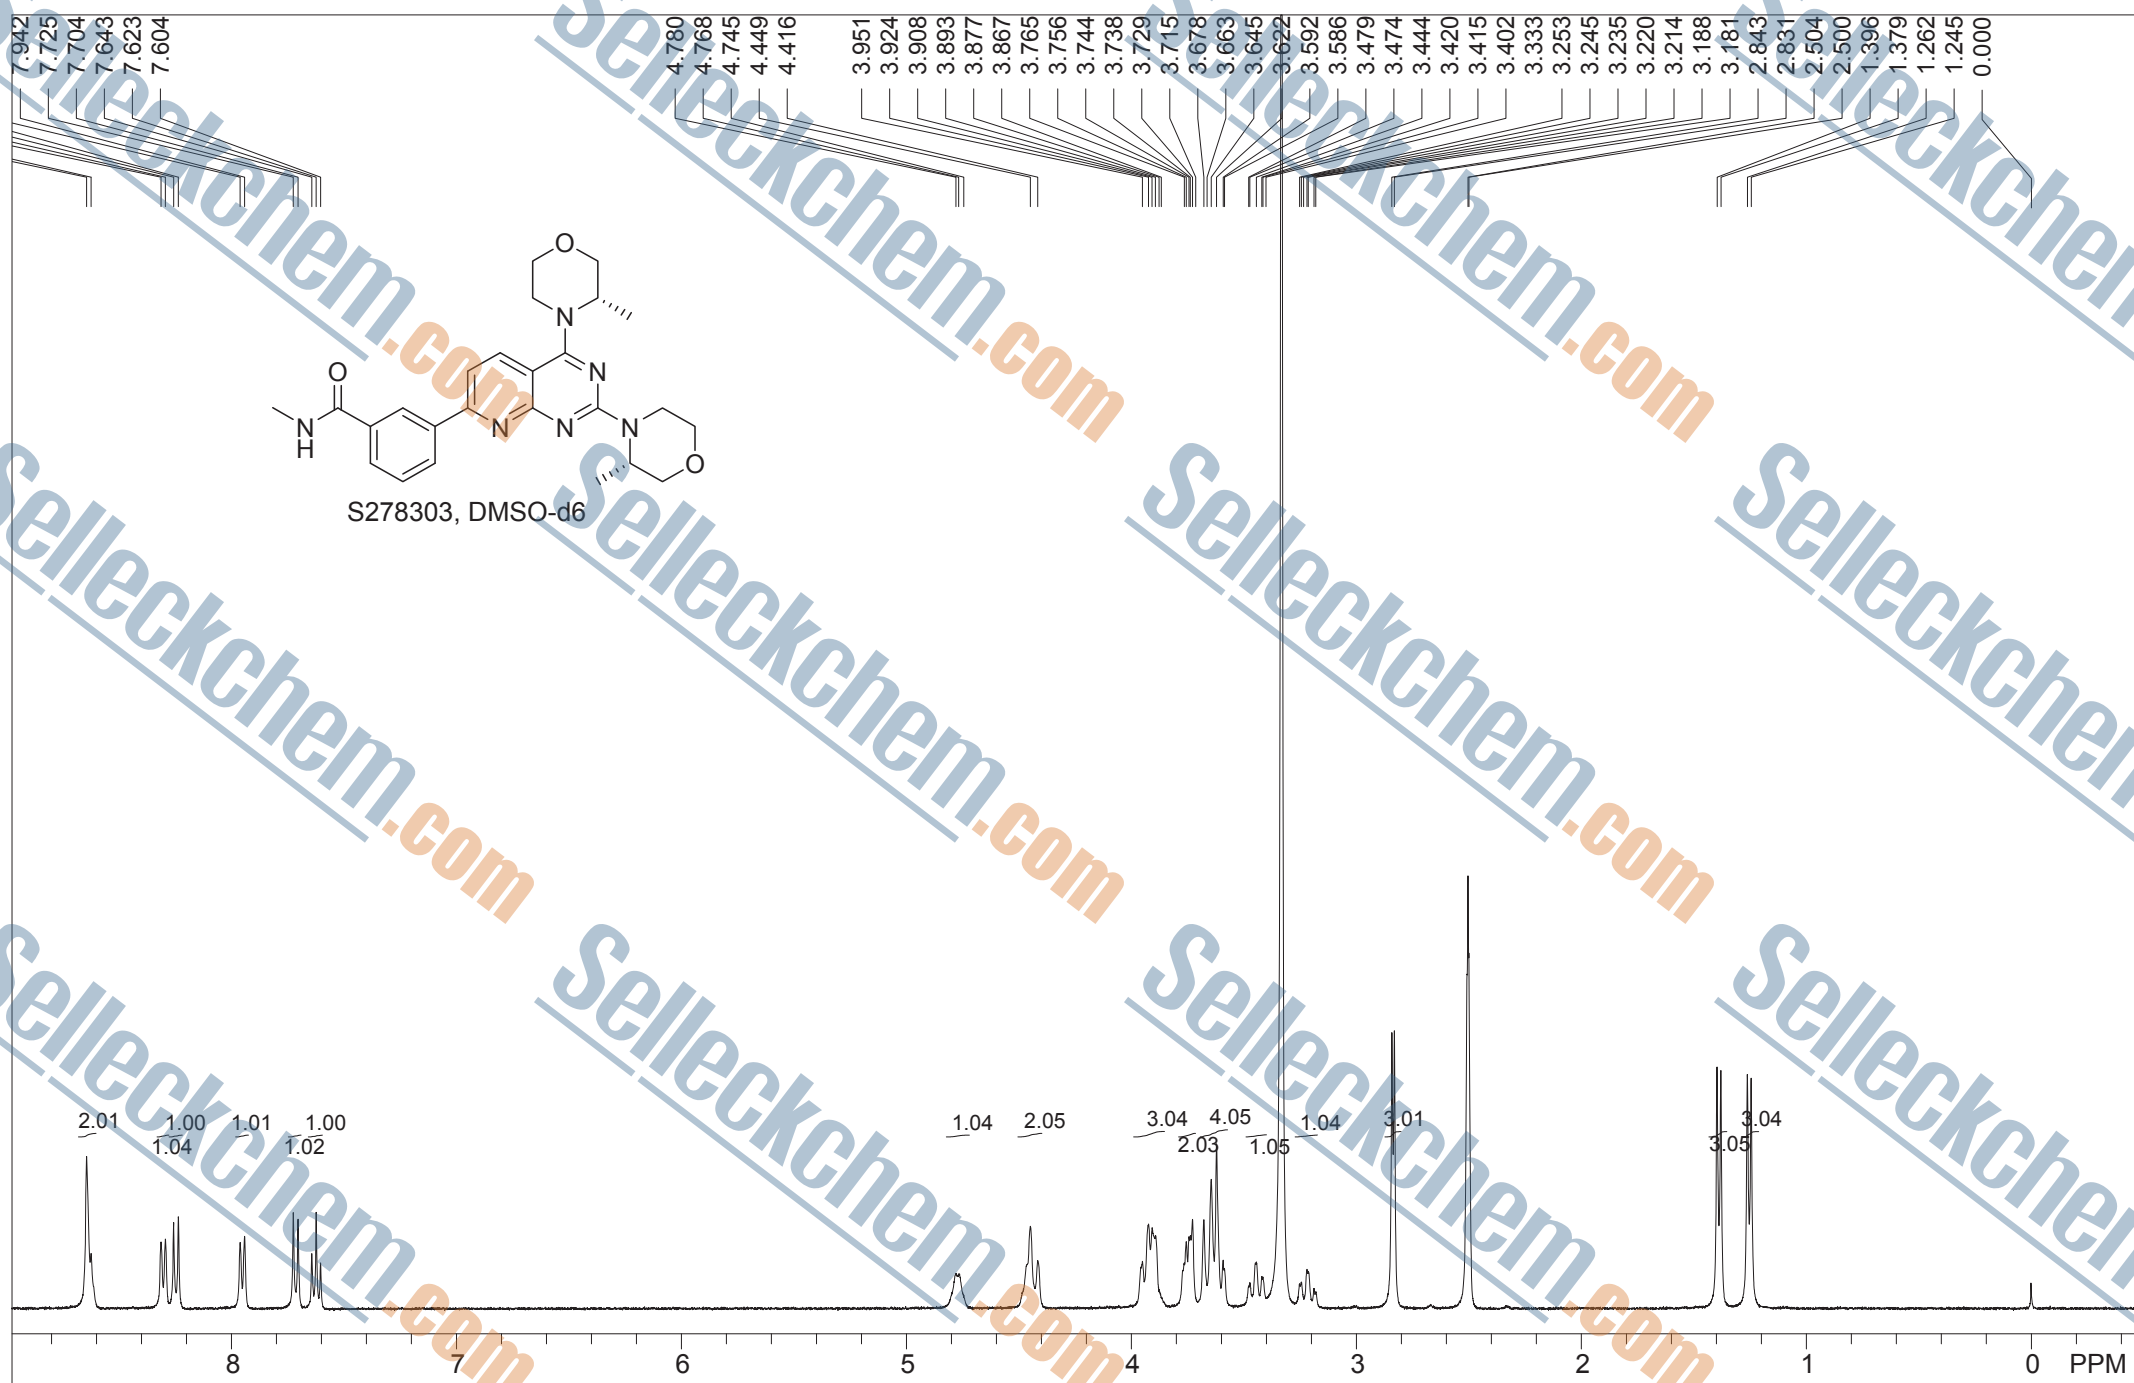

STANDARD PROTON PARAMETERS

|             |             |             |             |                      |
|-------------|-------------|-------------|-------------|----------------------|
| F1: 399.665 | F2: 100.504 | SW1: 8803   | OF1: 3606.2 | PTS1d: 32768 , 32768 |
| EX: s2pul   | PW: 6.5 us  | PD: 2.0 sec | NA: 8       | LB: 0.0              |

Nuts - SS278303 AZD2014



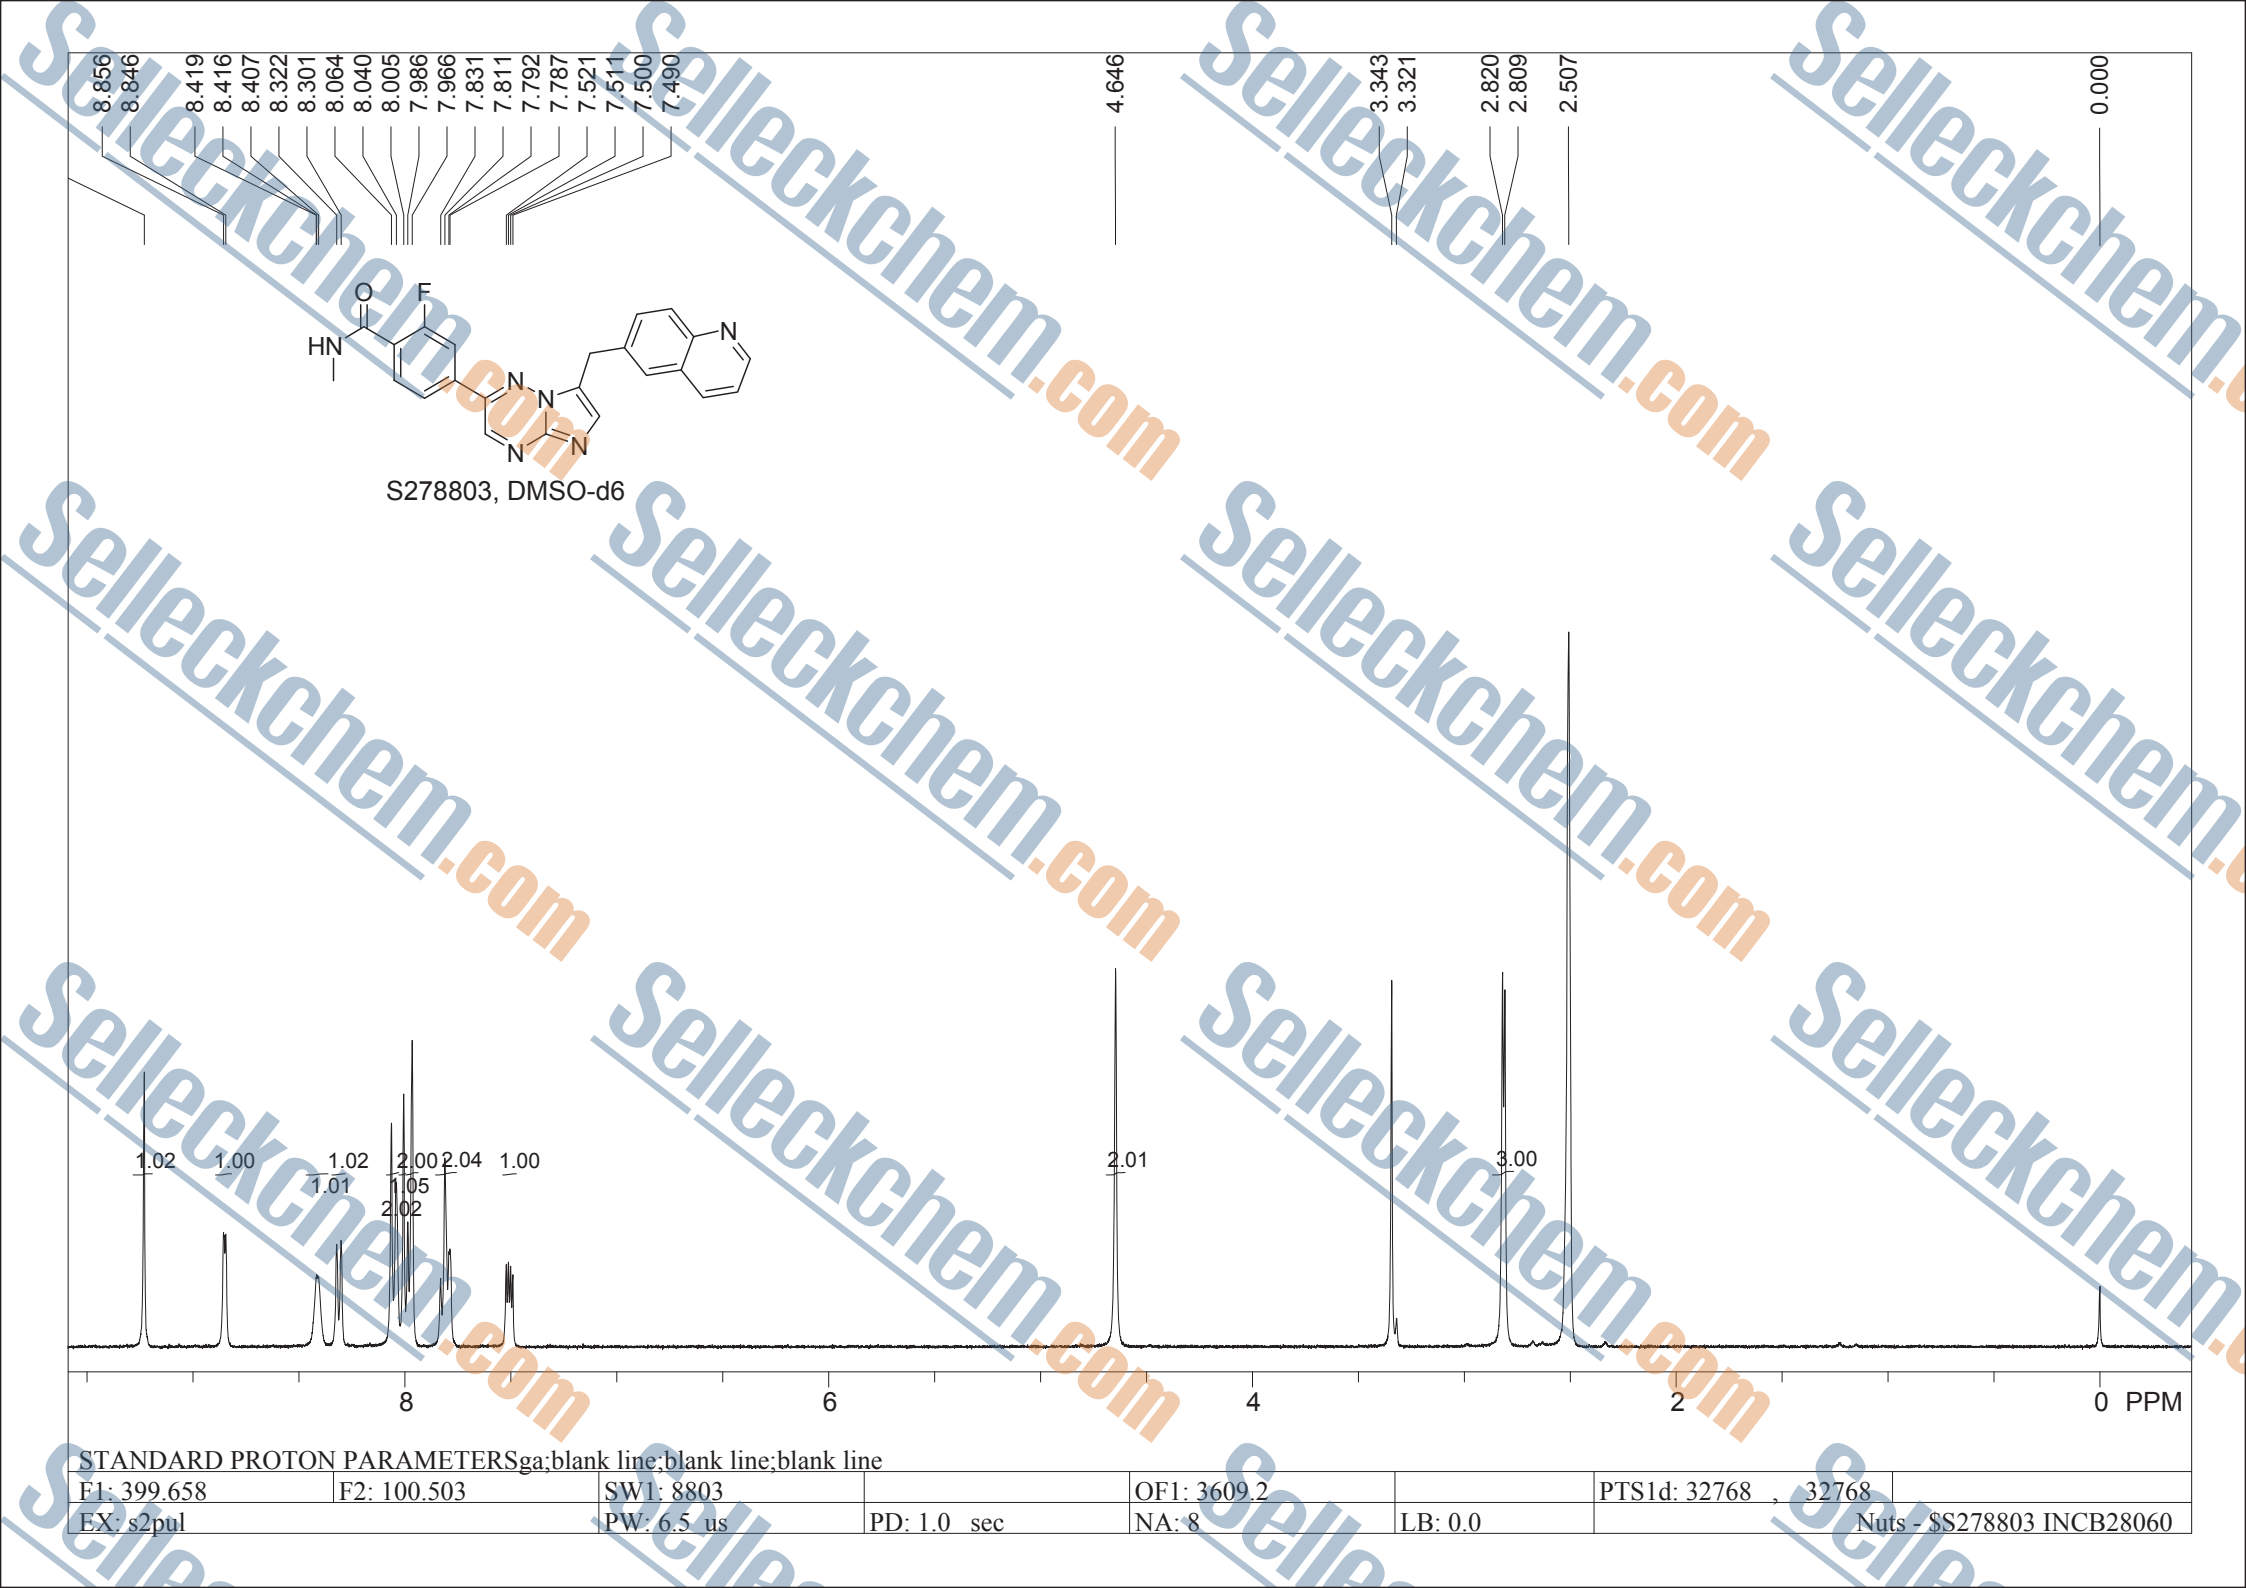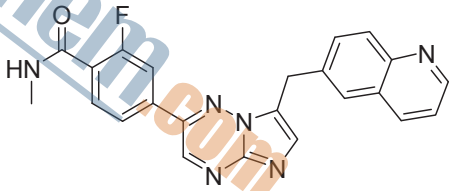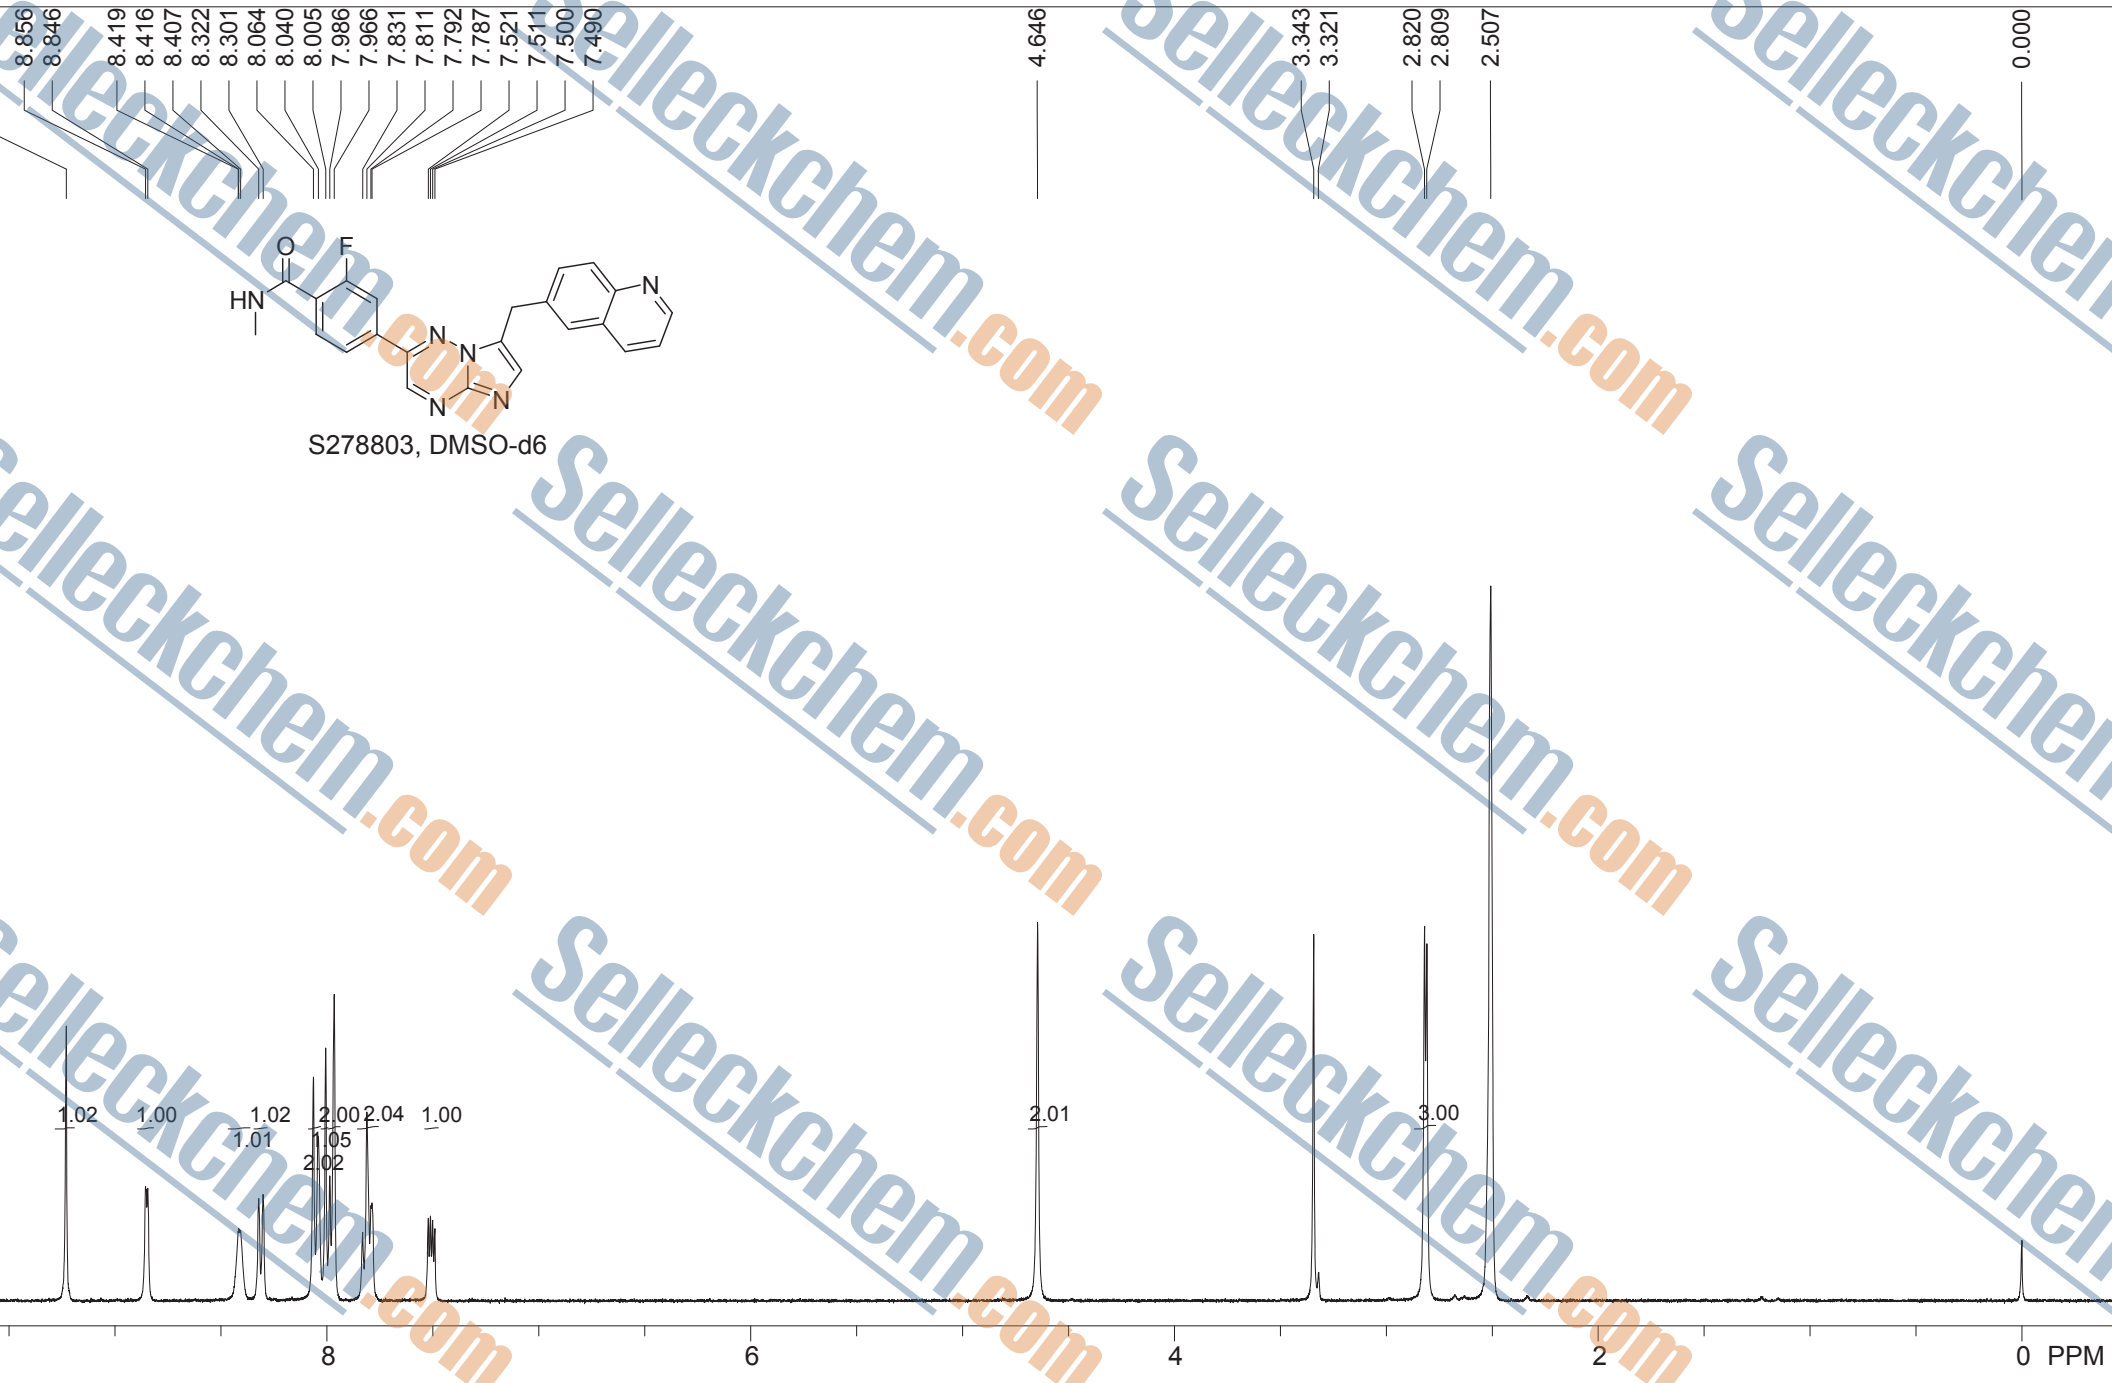

|                                                               |             |             |                             |                      |         |
|---------------------------------------------------------------|-------------|-------------|-----------------------------|----------------------|---------|
| STANDARD PROTON PARAMETERSga:blank line:blank line:blank line |             |             |                             | PTS1d: 32768 , 32768 |         |
| F1: 399.658                                                   | F2: 100.503 | SW1: 8803   | OF1: 3609.2                 | NA: 8                | LB: 0.0 |
| EX: s2pul                                                     | PW: 6.5 us  | PD: 1.0 sec | Nuts - \$\$278803 INCB28060 |                      |         |



Acq. Operator : SYSTEM  
 Acq. Instrument : 12601c

Seq. Line : 1  
 Location : Vial 1

Inj Volume : 10.000 µl

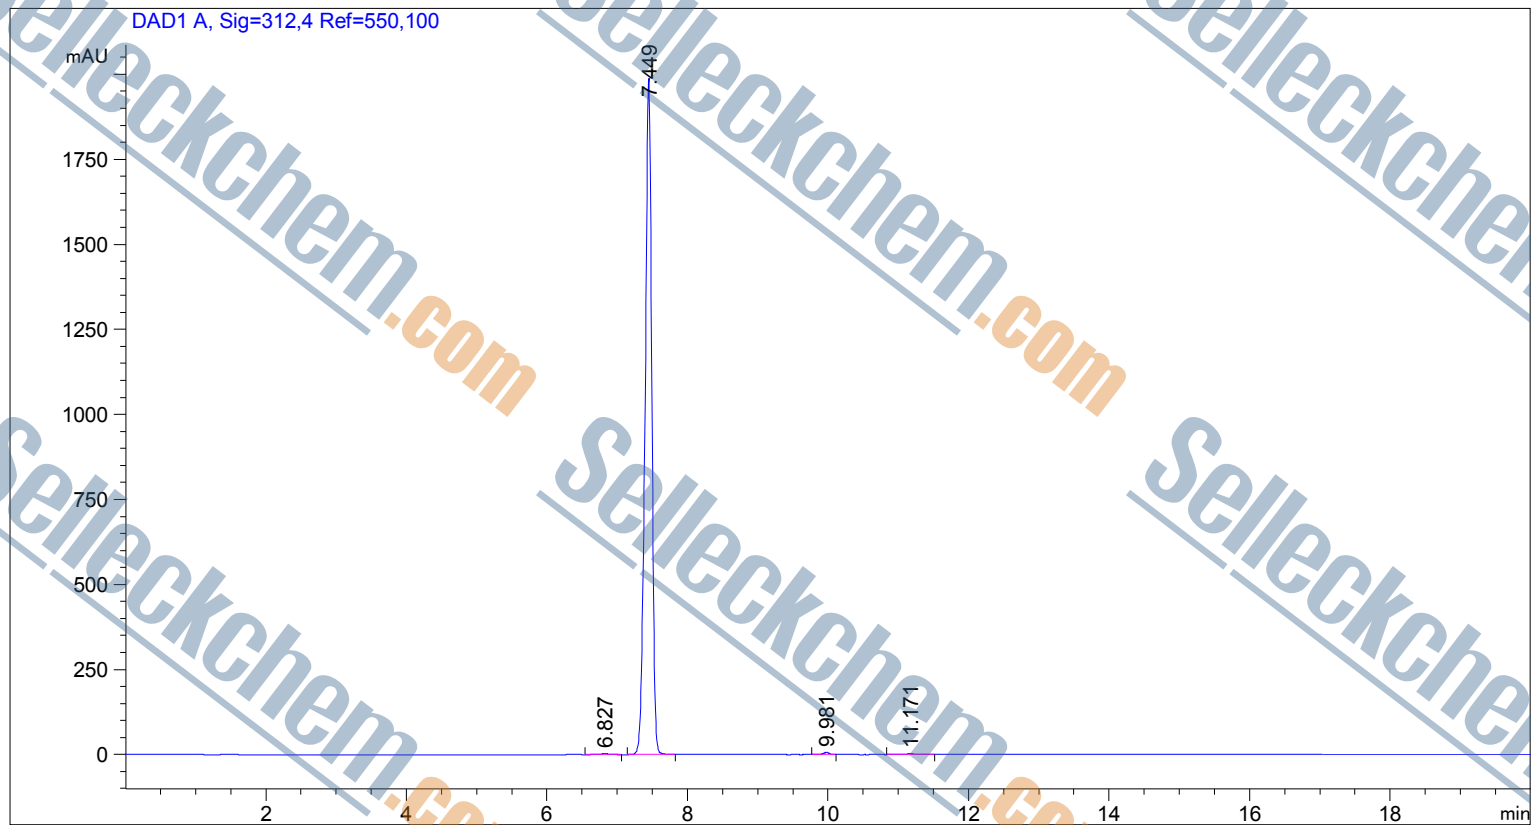

Area Percent Report

Sorted By : Signal  
 Multiplier : 1.0000  
 Dilution : 1.0000  
 Use Multiplier & Dilution Factor with ISTDs

Signal 1: DAD1 A, Sig=312,4 Ref=550,100

| Peak # | RetTime [min] | Type | Width [min] | Area [mAU*s] | Height [mAU] | Area %  |
|--------|---------------|------|-------------|--------------|--------------|---------|
| 1      | 6.827         | BB   | 0.1175      | 24.32292     | 2.85224      | 0.1835  |
| 2      | 7.449         | BB   | 0.0993      | 1.31752e4    | 1989.01953   | 99.3787 |
| 3      | 9.981         | BB   | 0.0850      | 35.25434     | 6.33246      | 0.2659  |
| 4      | 11.171        | BB   | 0.0961      | 22.78761     | 3.58560      | 0.1719  |

Totals : 1.32576e4 2001.78983

\*\*\* End of Report \*\*\*

S279101, DMSO-d6

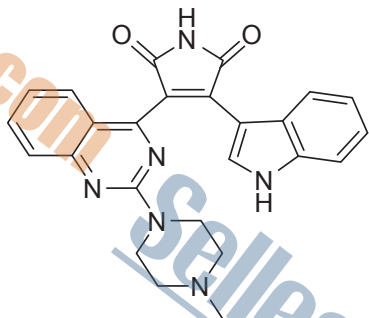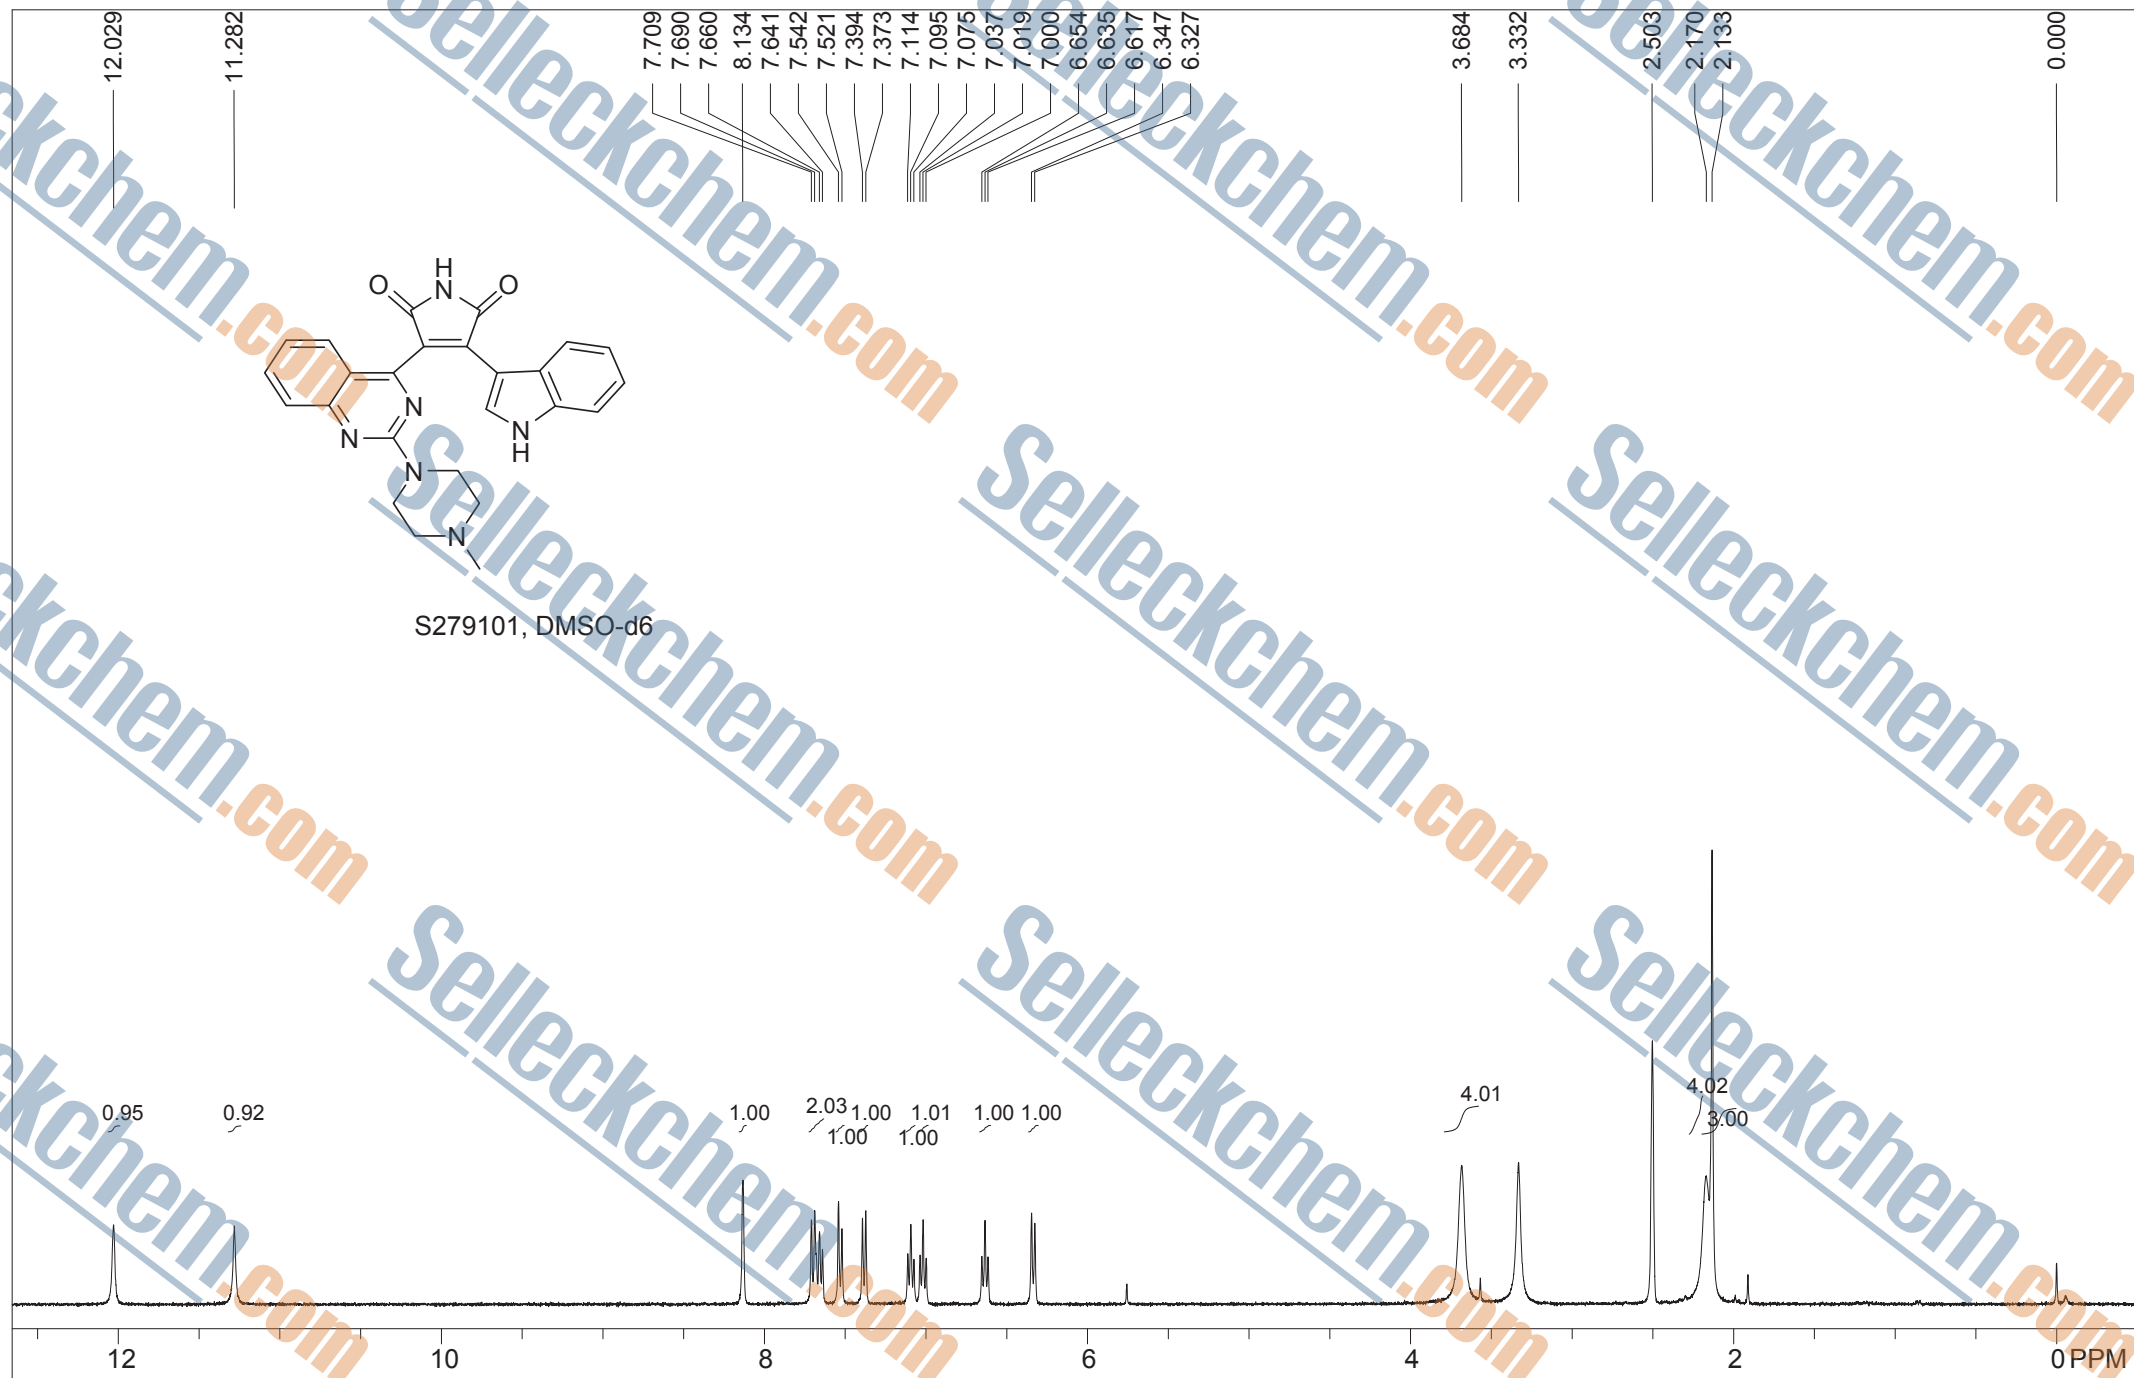

Std proton;blank line

|                                      |             |             |             |                     |
|--------------------------------------|-------------|-------------|-------------|---------------------|
| F1: 399.648                          | F2: 100.500 | SW1: 7225   | OF1: 2811.8 | PTS1d: 14803, 16384 |
| EX: s2pul                            | PW: 7.2 us  | PD: 2.0 sec | NA: 8       | LB: 0.0             |
| Nuts - S279101 Sotrastaurin (AEB071) |             |             |             |                     |

# SAMPLE INFORMATION

Sample Name: F2152 S279101 Sotrasturin(AEB071) Acquirde By: System  
Sample Type: Viat: 1 Acq. Method Set: Y  
Injection #: 5 Processing Method: 254  
Injection Volume: 20.00 ul Channel Name:  
Run Time: 30.0 Minutes Proc. Chnl. Descr: 254  
Sample Set Name:

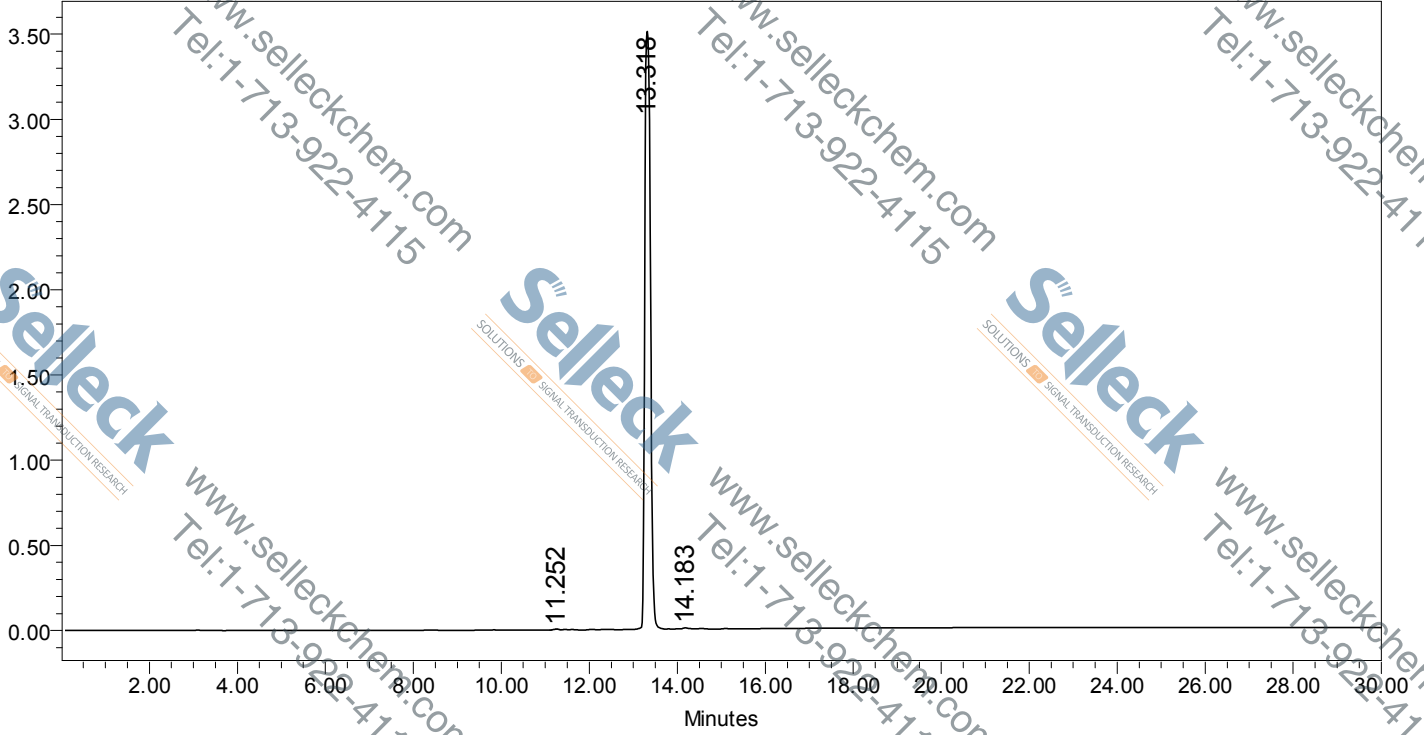

|   | RT     | Area     | Height  | % Area |
|---|--------|----------|---------|--------|
| 1 | 11.252 | 30485    | 4381    | 0.10   |
| 2 | 13.318 | 31280107 | 3519001 | 99.78  |
| 3 | 14.183 | 38493    | 5443    | 0.12   |

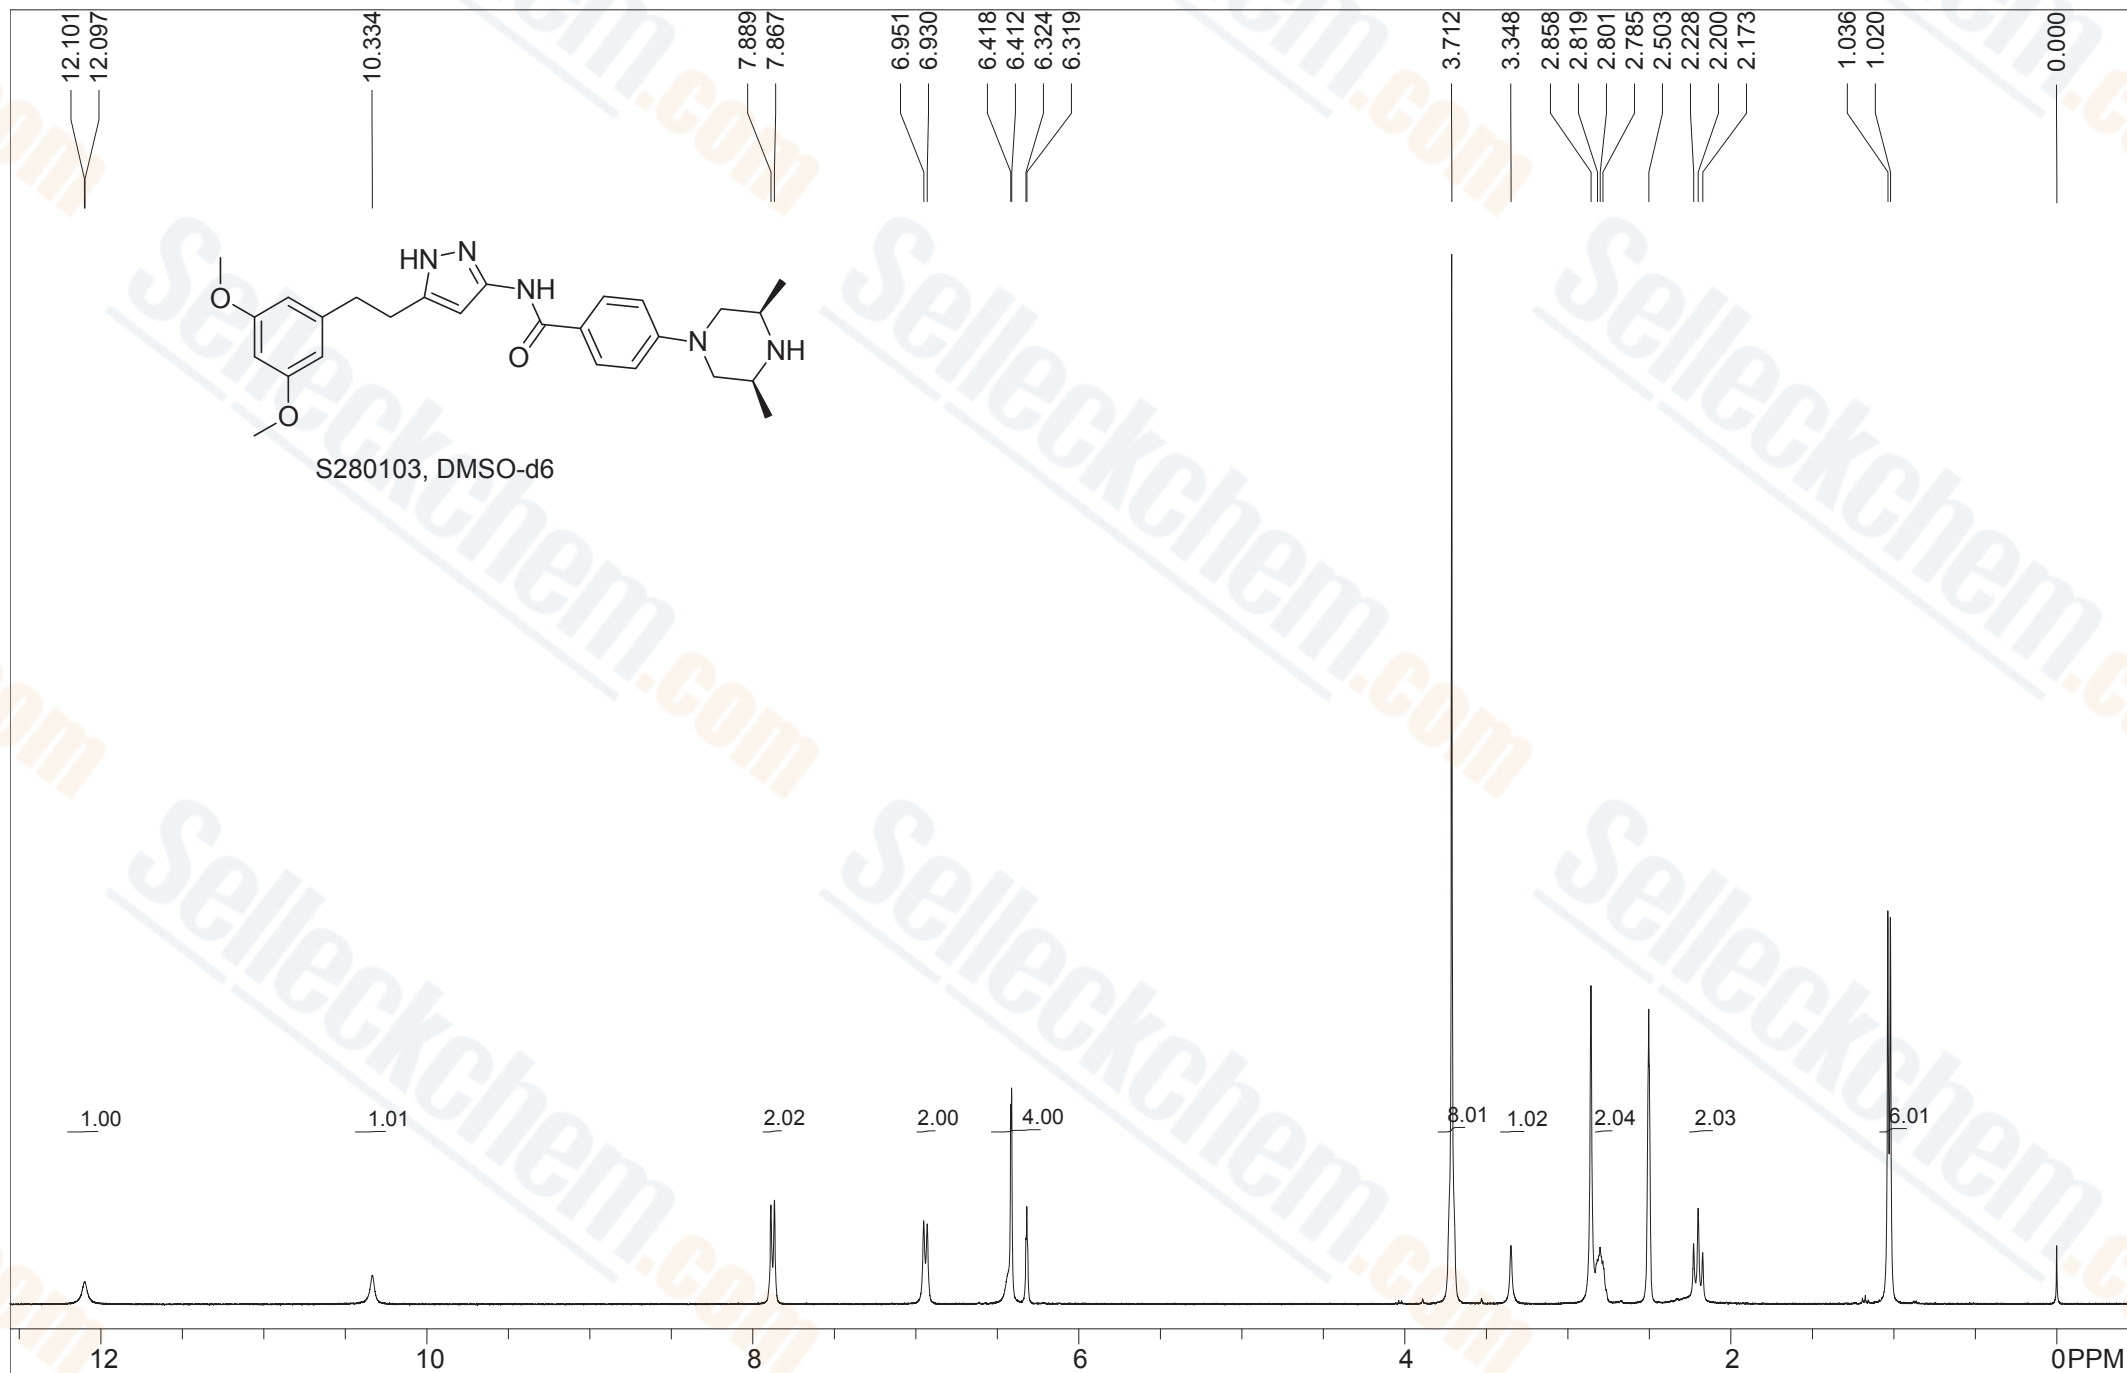

STANDARD PROTON PARAMETERS

|             |             |             |             |                     |
|-------------|-------------|-------------|-------------|---------------------|
| F1: 399.658 | F2: 100.503 | SW1: 8803   | OF1: 3607.8 | PTS1d: 32768, 32768 |
| EX: s2pul   | PW: 6.5 us  | PD: 1.0 sec | NA: 8       | LB: 0.0             |

Nuts - \$S280103 AZD4547

# SAMPLE INFORMATION

Sample Name: F4412 S280103 AZD4547  
Sample Type:  
Viat: 1  
Injection #: 36  
Injection Volume: 20.00 ul  
Run Time: 30.0 Minutes  
Sample Set Name:

Acquirde By: System  
Acq. Method Set: Z  
Processing Method: 254  
Channel Name:  
Proc. Chnl. Descr: 254

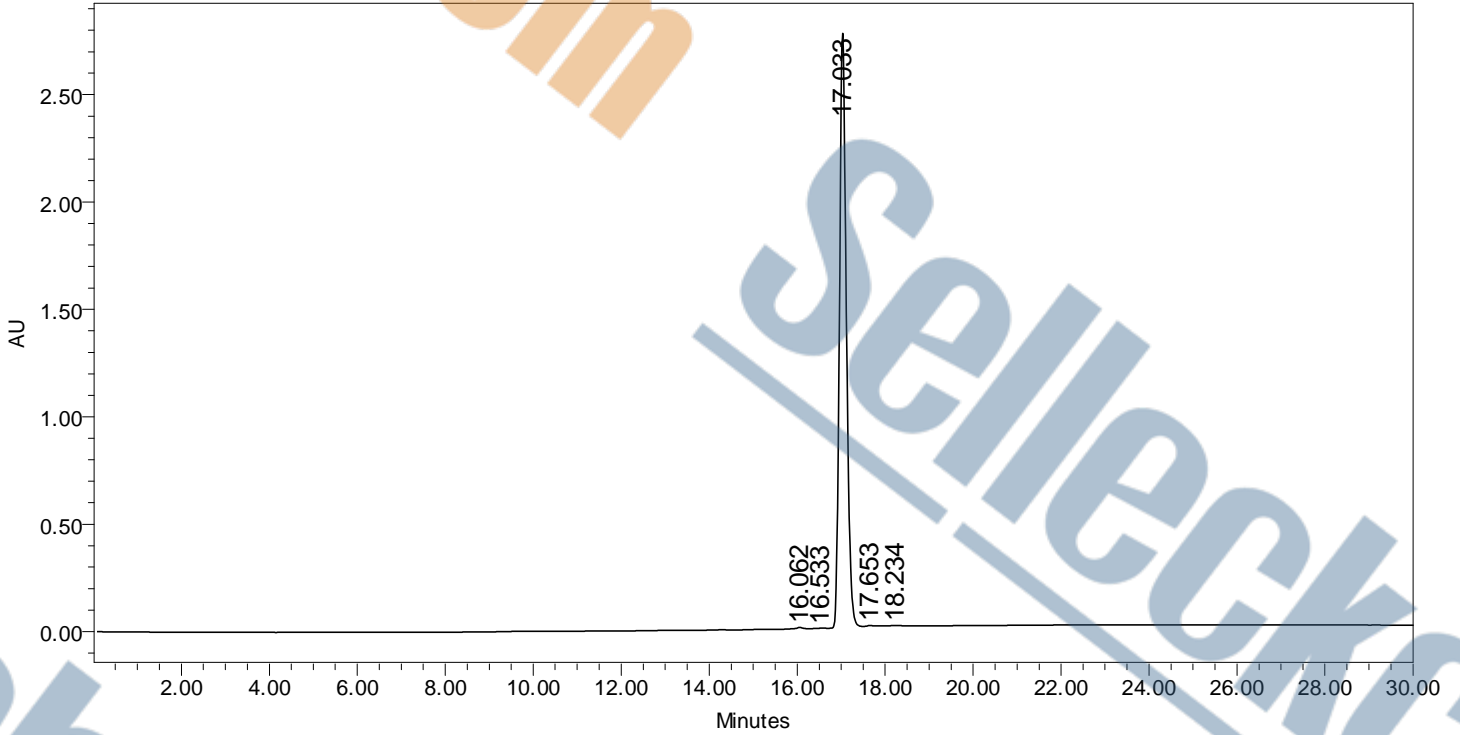

|   | RT     | Area     | Height  | % Area |
|---|--------|----------|---------|--------|
| 1 | 16.062 | 52702    | 6418    | 0.17   |
| 2 | 16.533 | 12591    | 1116    | 0.04   |
| 3 | 17.033 | 30050372 | 2764956 | 99.68  |
| 4 | 17.653 | 21520    | 2668    | 0.07   |
| 5 | 18.234 | 8788     | 1175    | 0.03   |

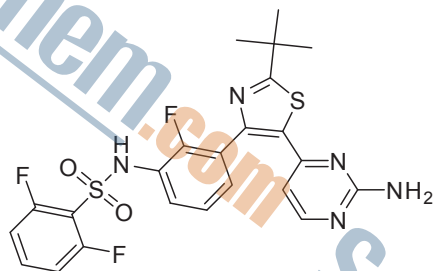

S280707, DMSO-d6

7.985  
7.972  
7.701  
7.686  
7.670  
7.665  
7.457  
7.439  
7.423  
7.379  
7.363  
7.347  
7.308  
7.300  
7.288  
7.268  
7.245  
7.222  
6.776  
5.837  
5.825

3.349

2.504

1.402

0.000

1.00

1.00

1.01

1.03

3.05

2.00

1.01

9.00

10

8

6

4

2

0PPM

STANDARD PROTON PARAMETERS

|             |             |             |             |                                         |
|-------------|-------------|-------------|-------------|-----------------------------------------|
| F1: 399.665 | F2: 100.504 | SW1: 8803   | OF1: 3607.0 | PTS1d: 32768 , 32768                    |
| EX: s2pul   | PW: 6.5 us  | PD: 2.0 sec | NA: 8       | LB: 0.0                                 |
|             |             |             |             | Nuts - SS280707 Dabrafenib (GSK2118436) |

```

=====
Acq. Operator   : SYSTEM                   Seq. Line : 3
Acq. Instrument : 12601c                  Location  : Vial 63

                                         Inj Volume : 2.000 µl
Different Inj Volume from Sample Entry! Actual Inj Volume : 4.000 µl
    
```

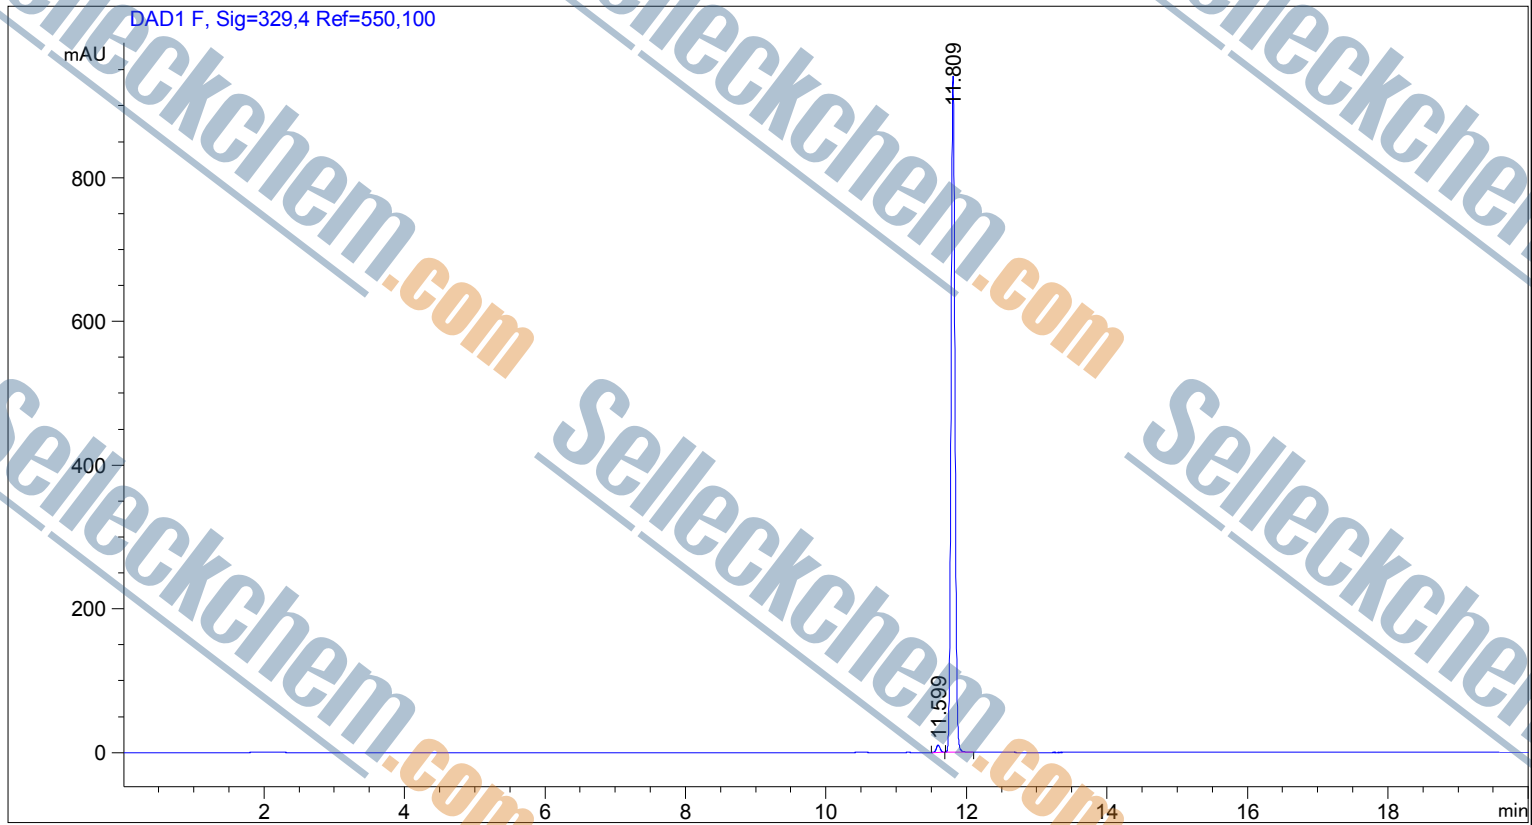

Area Percent Report

```

Sorted By       : Signal
Multiplier      : 1.0000
Dilution        : 1.0000
Use Multiplier & Dilution Factor with ISTDs
    
```

Signal 1: DAD1 F, Sig=329,4 Ref=550,100

| Peak #   | RetTime [min] | Type | Width [min] | Area [mAU*s] | Height [mAU] | Area %  |
|----------|---------------|------|-------------|--------------|--------------|---------|
| 1        | 11.599        | BB   | 0.0590      | 38.80899     | 10.30138     | 0.9675  |
| 2        | 11.809        | BB   | 0.0596      | 3596.79419   | 941.20087    | 99.0325 |
| Totals : |               |      |             | 3635.60318   | 951.50224    |         |

\*\*\* End of Report \*\*\*

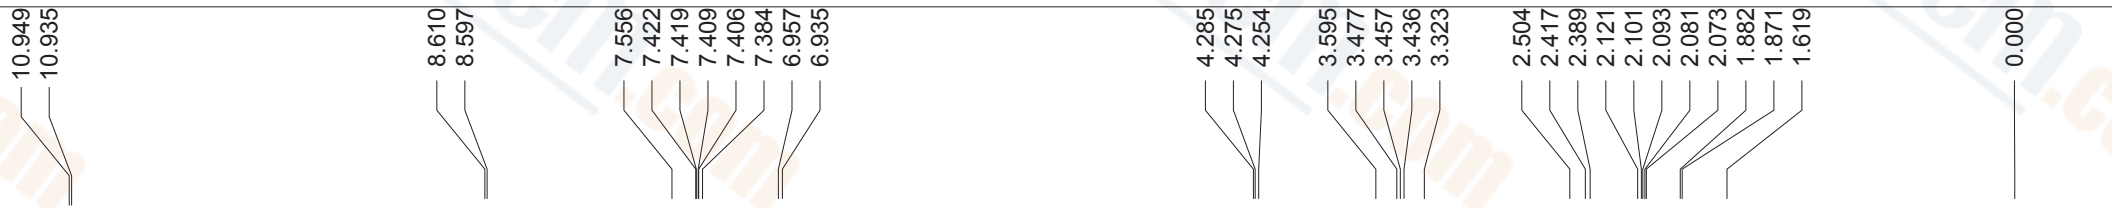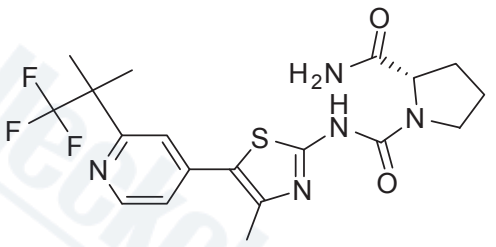

S281402, DMSO-d6

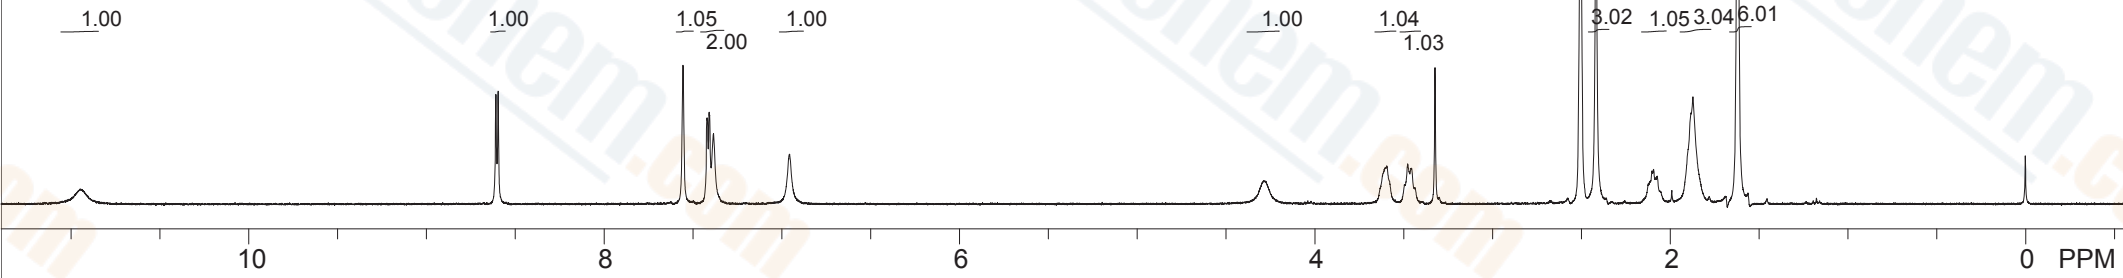

STANDARD PROTON PARAMETERS

|             |             |             |             |                      |
|-------------|-------------|-------------|-------------|----------------------|
| F1: 399.658 | F2: 100.503 | SW1: 8803   | OF1: 3608.1 | PTS1d: 32768 , 32768 |
| EX: s2pul   | PW: 6.5 us  | PD: 1.0 sec | NA: 8       | LB: 0.0              |



# SAMPLE INFORMATION

Sample Name: F4397 S281402 BYL719  
Sample Type:  
Viat: 1  
Injection #: 11  
Injection Volume: 20.00 ul  
Run Time: 30.0 Minutes  
Sample Set Name:

Acquirde By: System  
Acq. Method Set: Z  
Processing Method: 316  
Channel Name:  
Proc. Chnl. Descr: 316

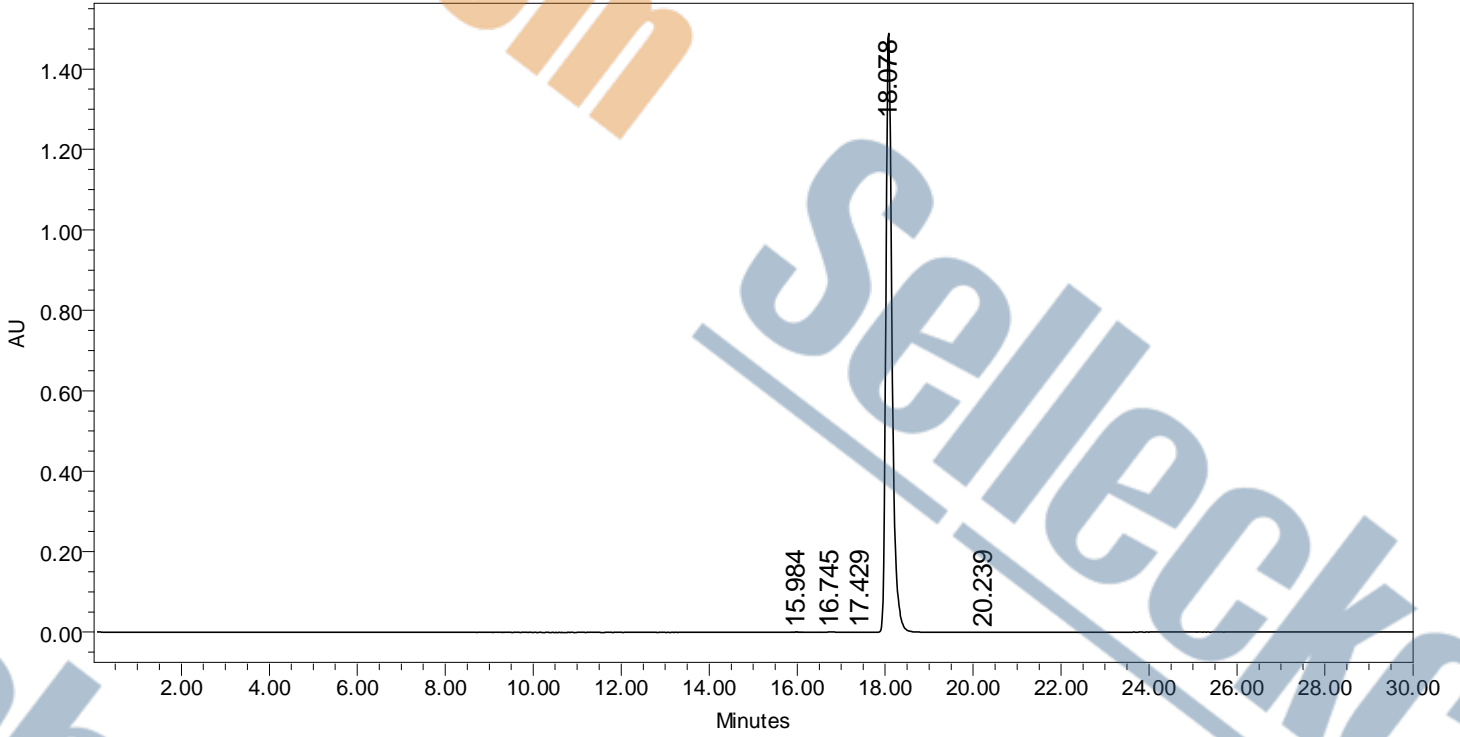

|   | RT     | Area     | Height  | % Area |
|---|--------|----------|---------|--------|
| 1 | 15.984 | 6449     | 854     | 0.04   |
| 2 | 16.745 | 11739    | 990     | 0.08   |
| 3 | 17.429 | 2177     | 240     | 0.01   |
| 4 | 18.078 | 14504407 | 1492195 | 99.84  |
| 5 | 20.239 | 2284     | 296     | 0.02   |

7.272 7.254 7.194 7.176 7.162 7.153 7.136 7.098 7.087 7.076 7.070 7.065

4.542 4.535 4.523 4.515 4.384 4.377 4.358 4.344 4.336 4.284 4.278 4.276 4.262 4.257 3.599 3.331 3.115 3.101 3.006 2.982 2.966 2.951 2.948 2.908 2.776 2.751 2.739 2.717 2.507 2.503 2.470 2.454 2.429 1.881 1.868 1.799 1.797 1.795 1.623 1.617 1.608 1.604 1.508 1.507 1.492 1.410 1.394 1.378 1.363 1.348 1.338 1.326 1.309 1.303 1.293 1.287

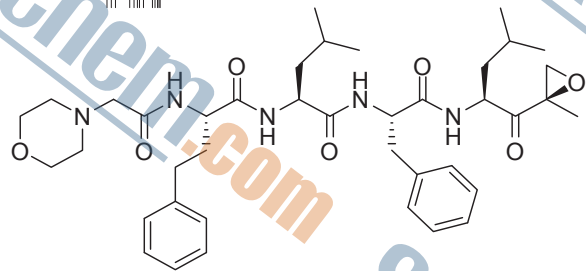

S285305, DMSO-d6

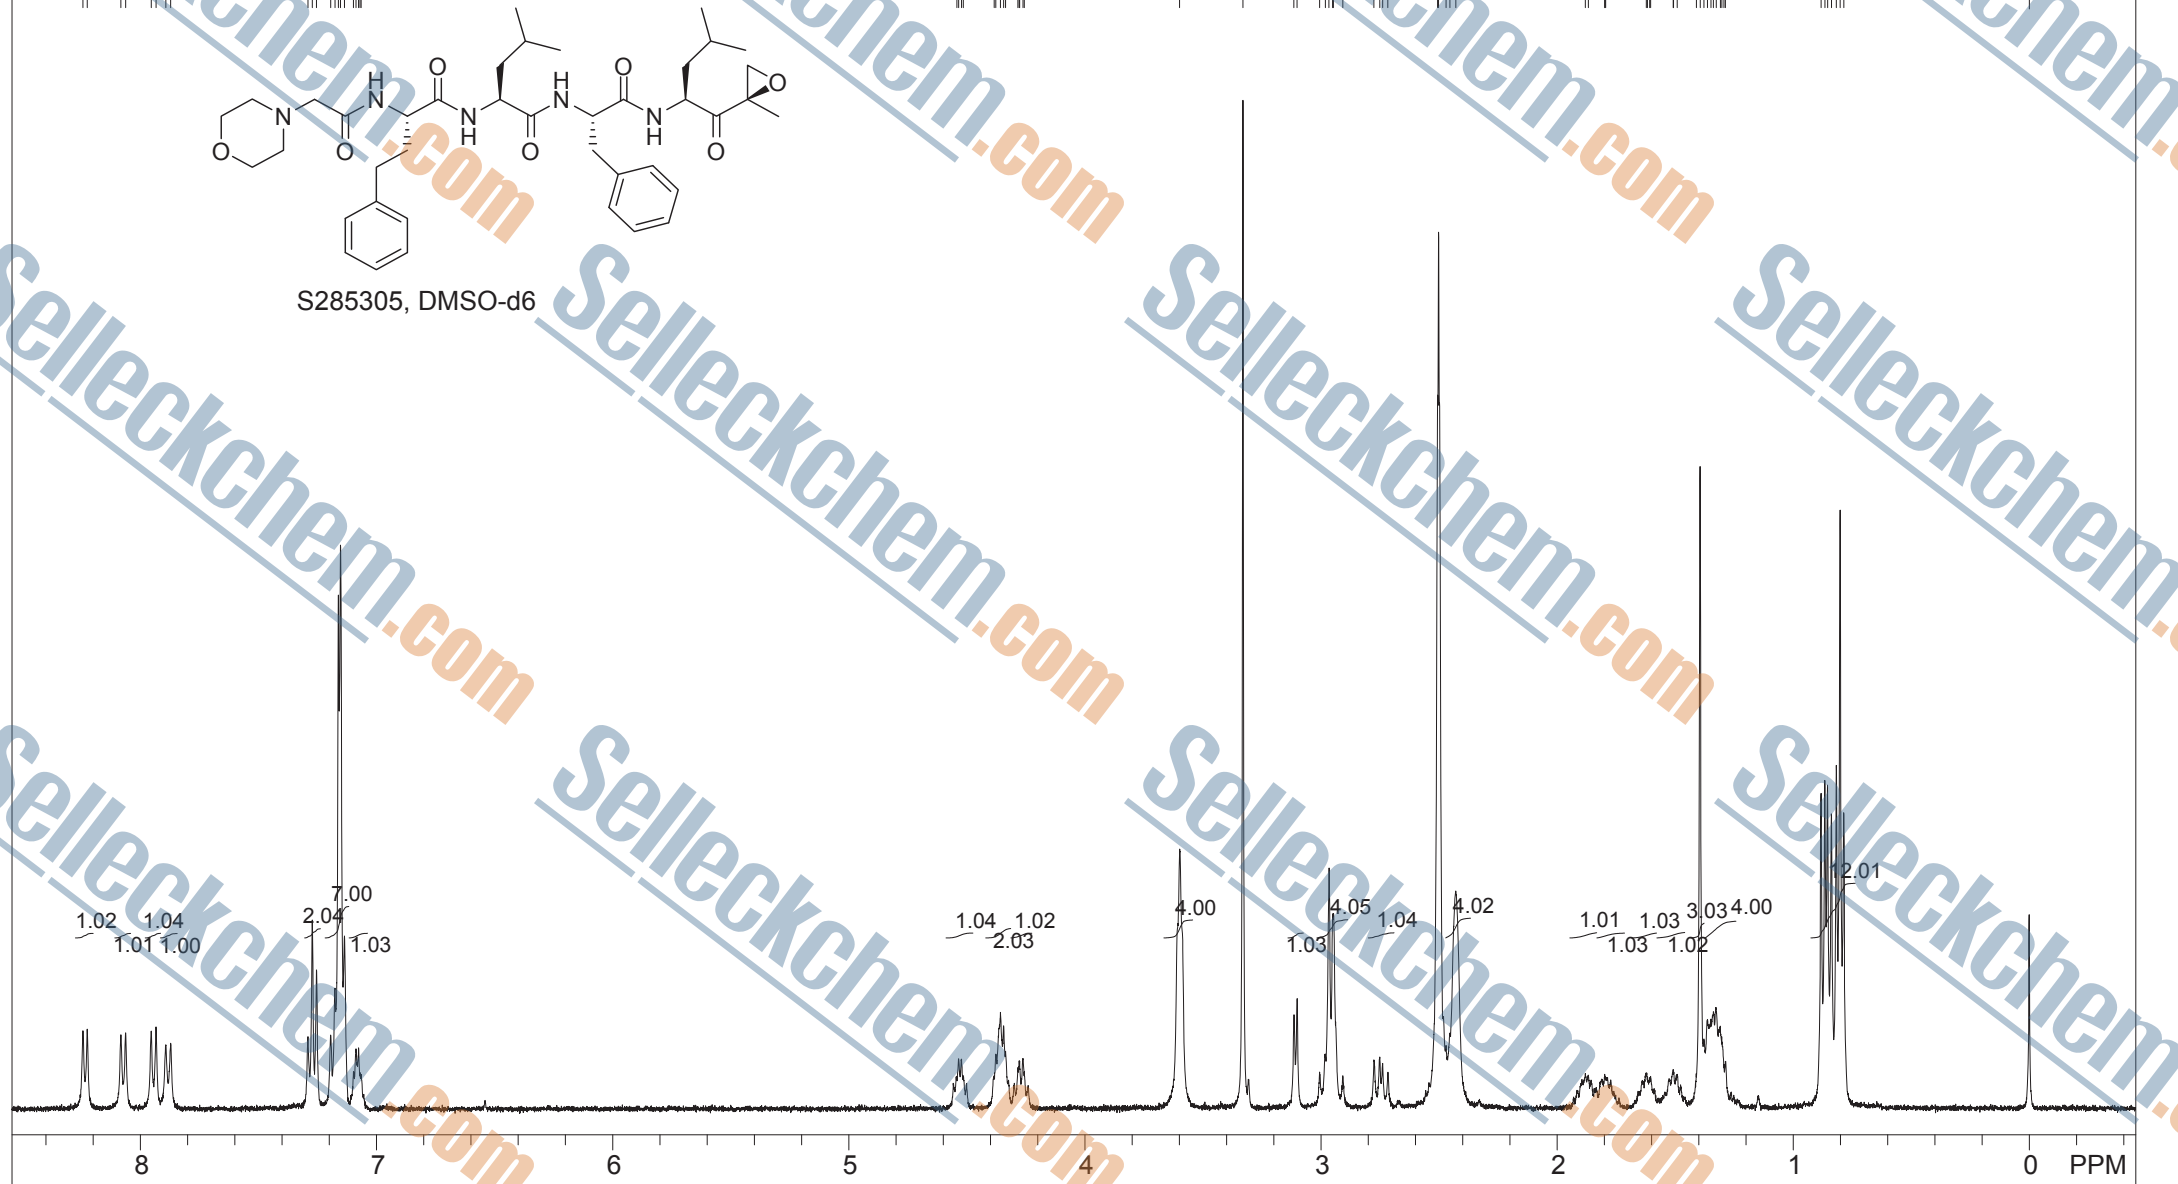

STANDARD PROTON PARAMETERSga;blank line;blank line;blank line

|             |             |             |             |                            |
|-------------|-------------|-------------|-------------|----------------------------|
| F1: 399.665 | F2: 100.504 | SW1: 8803   | OF1: 3606.2 | PTS1d: 32768 , 32768       |
| EX: s2pul   | PW: 6.5 us  | PD: 1.0 sec | NA: 8       | LB: 0.0                    |
|             |             |             |             | Nuts - S285305 Carfilzomib |

```

=====
Acq. Operator   : SYSTEM                      Seq. Line :    2
Acq. Instrument : 12601c                     Location  : Vial 47

                                           Inj Volume : 2.000 µl
Different Inj Volume from Sample Entry! Actual Inj Volume : 0.800 µl
=====
    
```

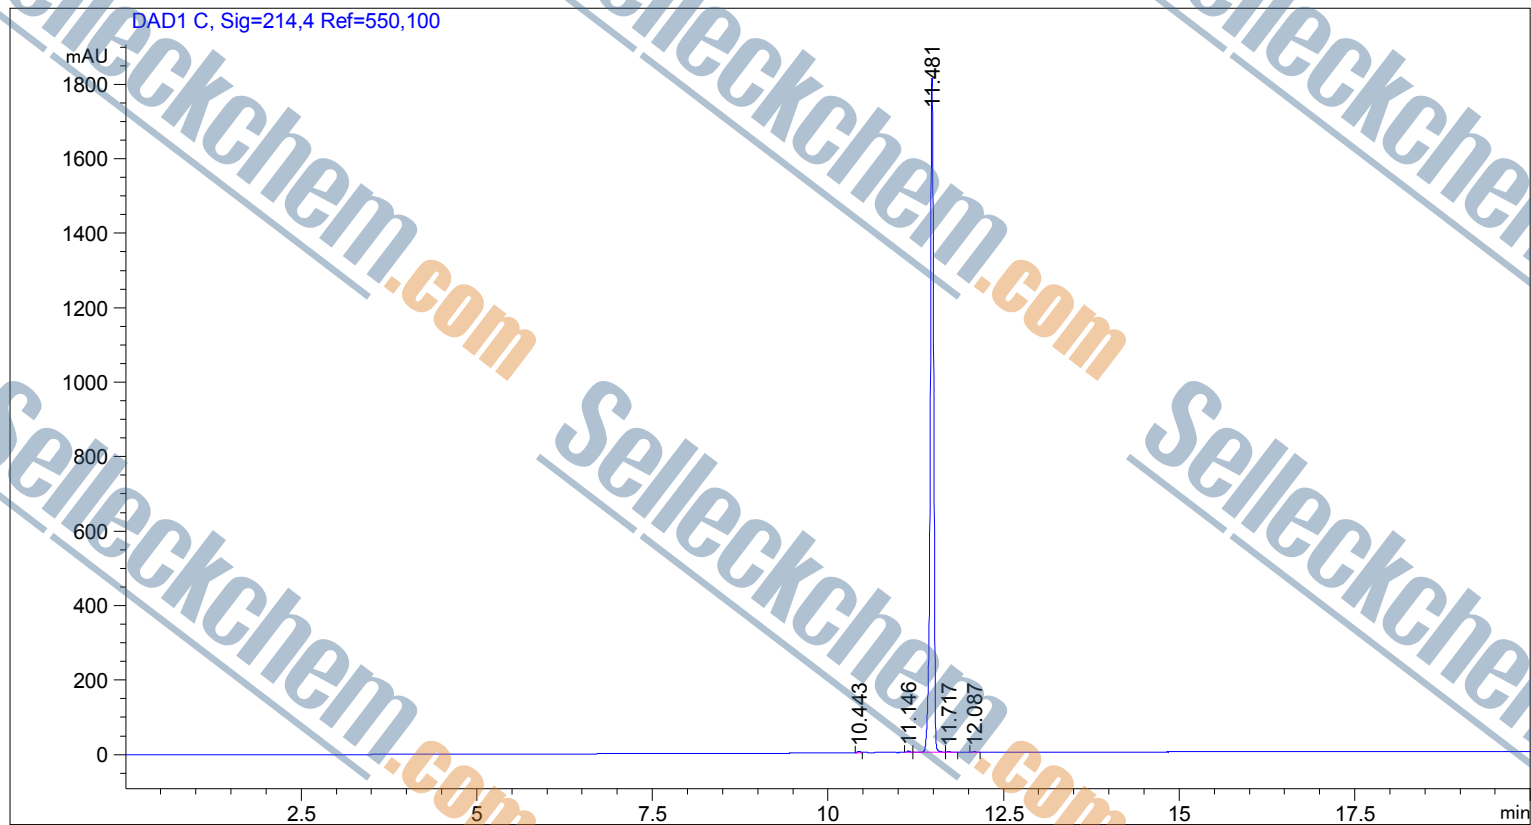

Area Percent Report

```

Sorted By      : Signal
Multiplier     : 1.0000
Dilution      : 1.0000
Use Multiplier & Dilution Factor with ISTDs
    
```

Signal 1: DAD1 C, Sig=214,4 Ref=550,100

| Peak # | RetTime [min] | Type | Width [min] | Area [mAU*s] | Height [mAU] | Area %  |
|--------|---------------|------|-------------|--------------|--------------|---------|
| 1      | 10.443        | BV   | 0.0462      | 11.30002     | 3.79826      | 0.1828  |
| 2      | 11.146        | VB   | 0.0462      | 10.61237     | 3.57223      | 0.1716  |
| 3      | 11.481        | BV   | 0.0541      | 6146.32227   | 1811.48279   | 99.4068 |
| 4      | 11.717        | VB   | 0.0550      | 8.27167      | 2.22041      | 0.1338  |
| 5      | 12.087        | BB   | 0.0469      | 6.49574      | 2.20147      | 0.1051  |

Totals : 6183.00207 1823.27515

=====  
\*\*\* End of Report \*\*\*

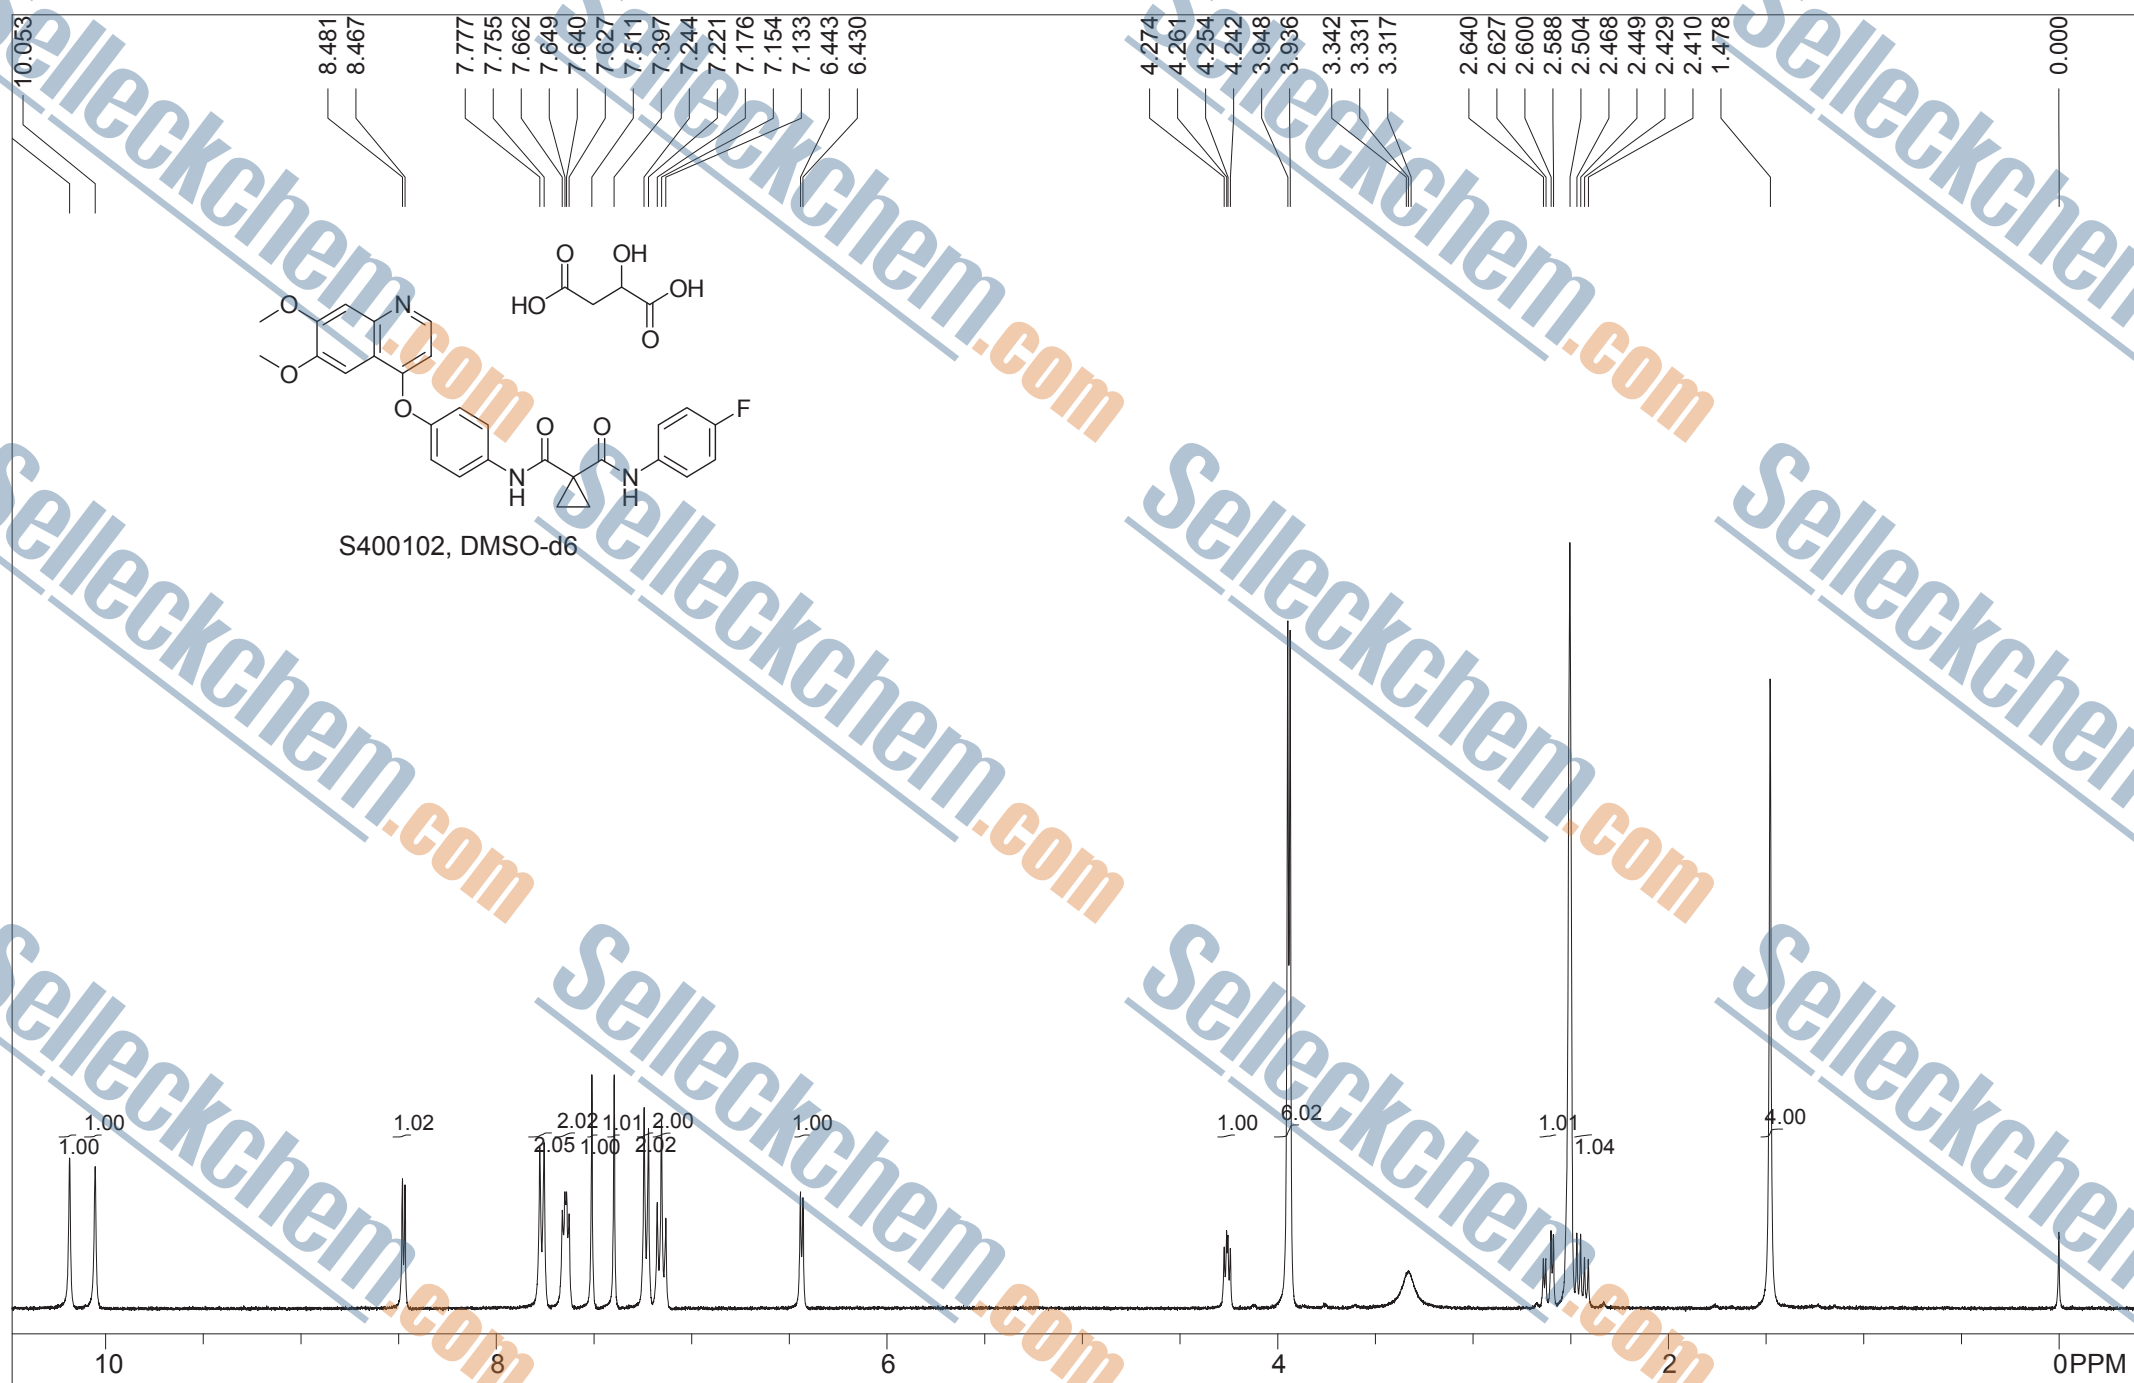

S400102, DMSO-d6

|                                                  |             |             |  |             |  |                      |                                              |
|--------------------------------------------------|-------------|-------------|--|-------------|--|----------------------|----------------------------------------------|
| STANDARD PROTON PARAMETERS:blank line:blank line |             |             |  |             |  |                      |                                              |
| F1: 399.658                                      | F2: 100.503 | SW1: 8803   |  | OF1: 3607.3 |  | PTS1d: 32768 , 32768 |                                              |
| EX: s2pul                                        | PW: 6.5 us  | PD: 1.0 sec |  | NA: 8       |  | LB: 0.0              | Nuts - SS400102 Cabozantinib malate (XL-184) |

Acq. Operator : SYSTEM      Seq. Line : 1  
 Acq. Instrument : 1260lc      Location : Vial 1

Inj Volume : 7.000  l

Additional Info : Peak(s) manually integrated

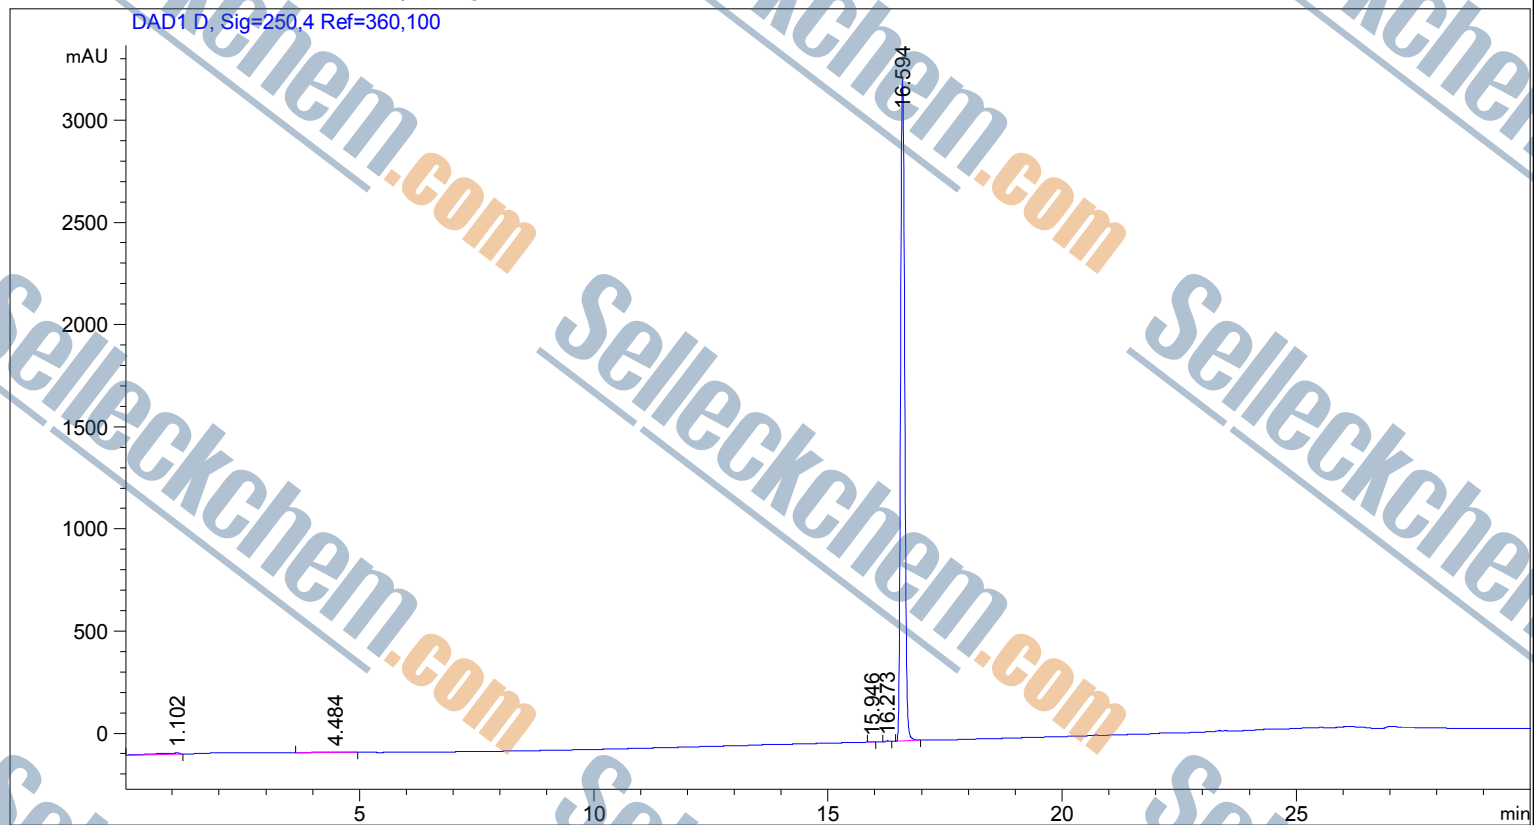

Area Percent Report

Sorted By : Signal  
 Multiplier : 1.0000  
 Dilution : 1.0000  
 Use Multiplier & Dilution Factor with ISTDs

Signal 1: DAD1 D, Sig=250,4 Ref=360,100

| Peak # | RetTime [min] | Type | Width [min] | Area [mAU*s] | Height [mAU] | Area % |
|--------|---------------|------|-------------|--------------|--------------|--------|
| 1      | 1.102         | BB   | 0.3596      | 238.53047    | 8.44369      | 0.6121 |
| 2      | 4.484         | BB   | 0.4608      | 80.17728     | 2.55011      | 0.2074 |
| 3      | 15.946        | BB   | 0.0780      | 6.41408      | 1.29061      | 0.0326 |
| 4      | 16.273        | BB   | 0.0771      | 17.25596     | 3.52650      | 0.0877 |
| 5      | 16.594        | BB   | 0.0956      | 1.93370e4    | 3241.72266   | 9.0602 |

Totals : 1.96794e4 3257.53356

=====  
\*\*\* End of Report \*\*\*

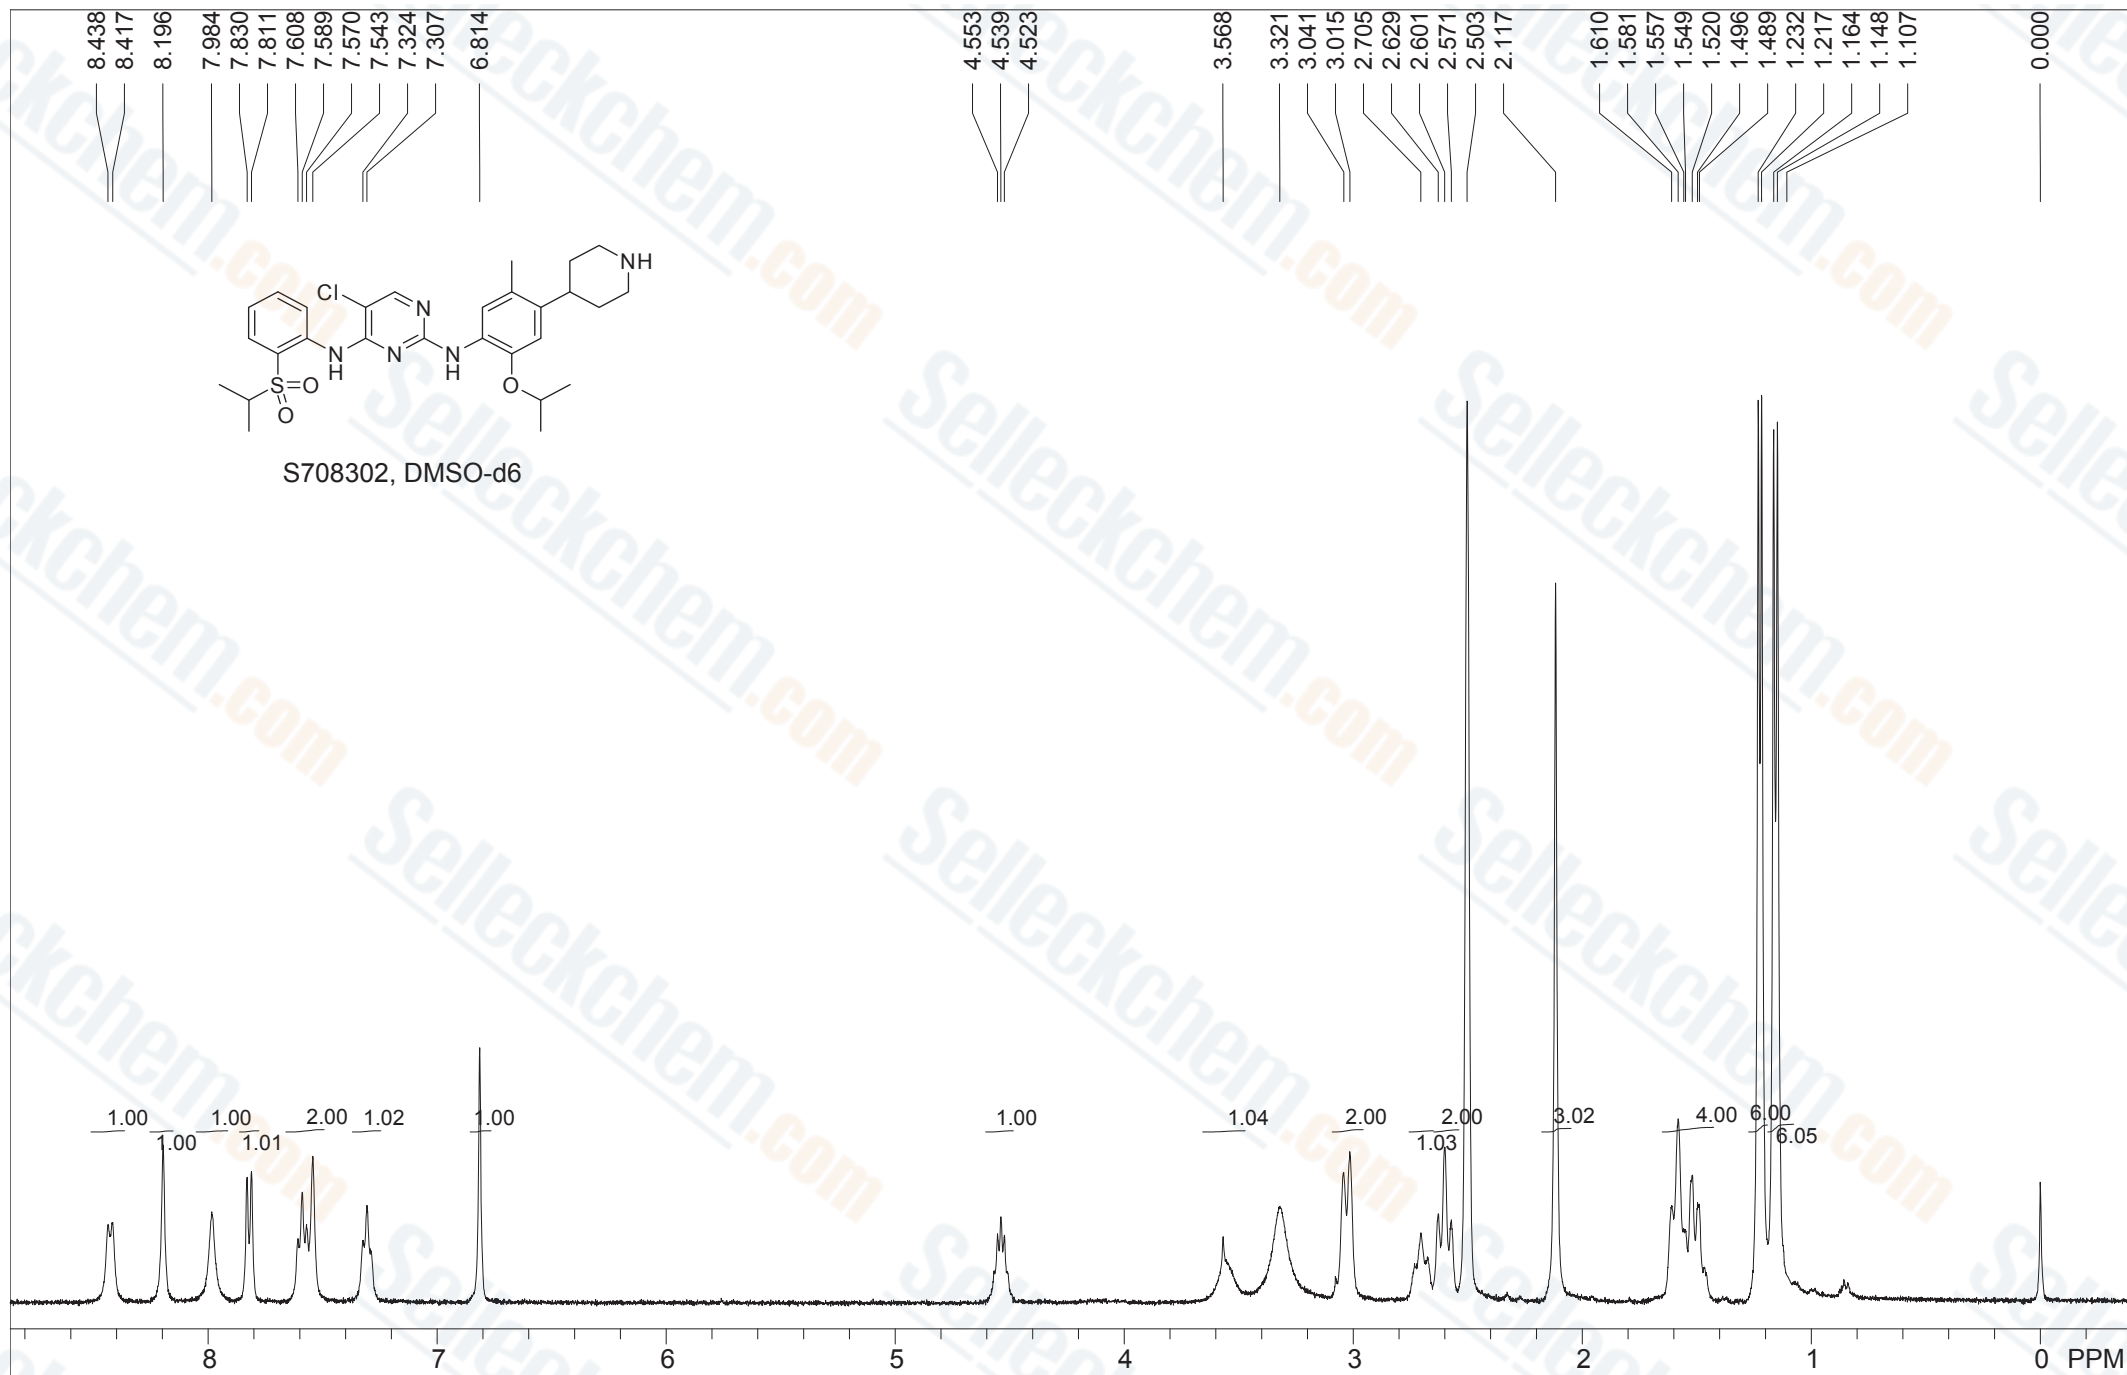

:blank linegaStd proton:blank line

|             |             |             |             |                      |
|-------------|-------------|-------------|-------------|----------------------|
| F1: 399.648 | F2: 100.500 | SW1: 7225   | OF1: 2810.5 | PTS1d: 14803 , 16384 |
| EX: s2pul   | PW: 7.2 us  | PD: 2.0 sec | NA: 8       | LB: 0.0              |

Nuts - \$S708302 LDK378



# SAMPLE INFORMATION

Sample Name: F3909 S708302 LDK378  
Sample Type:  
Viat: 1  
Injection #: 7  
Injection Volume: 20.00 ul  
Run Time: 30.0 Minutes  
Sample Set Name:

Acquirde By: System  
Acq Method Set: Z  
Processing Method: 277  
Channel Name:  
Proc. Chnl. Descr: 277

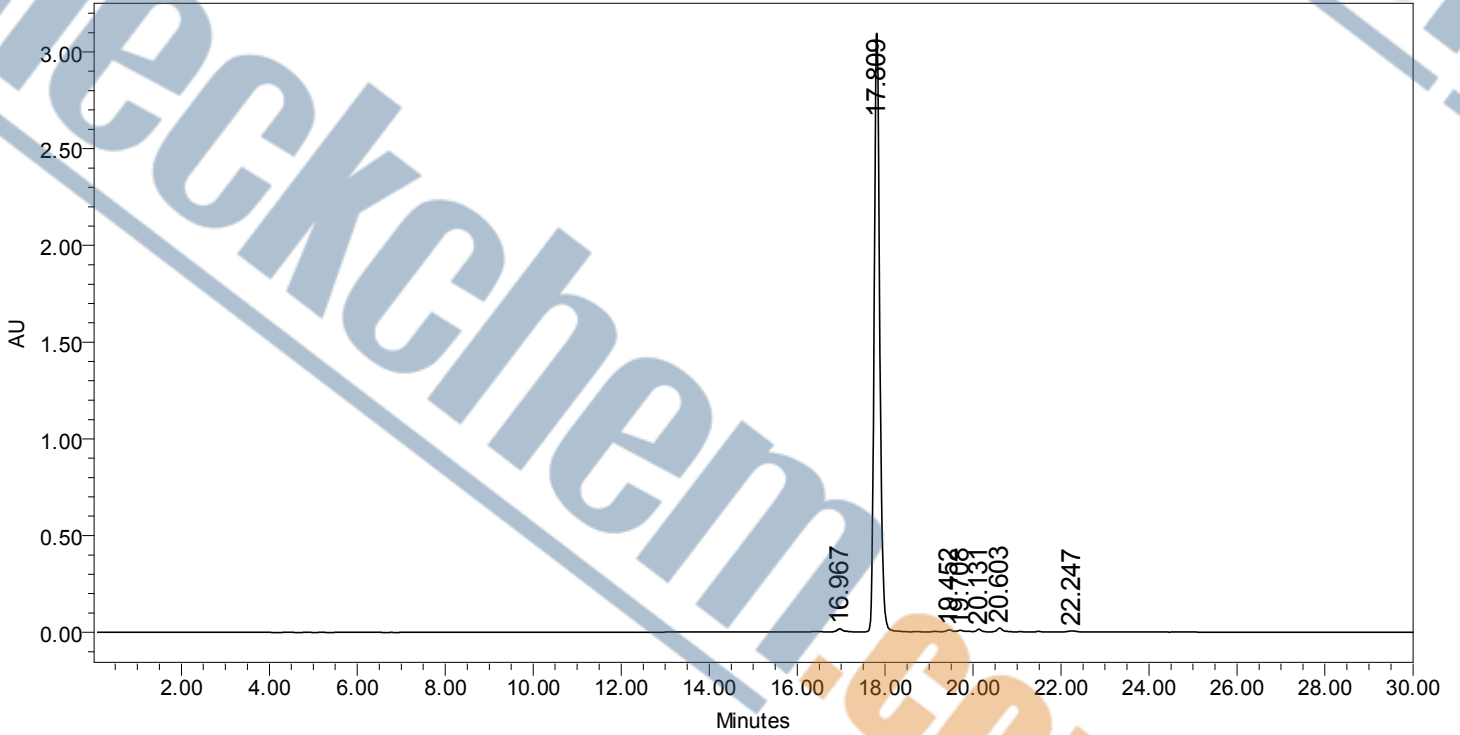

|   | RT     | Area     | Height  | % Area |
|---|--------|----------|---------|--------|
| 1 | 16.967 | 48360    | 15077   | 0.18   |
| 2 | 17.809 | 27275054 | 3113867 | 99.07  |
| 3 | 19.452 | 25730    | 8117    | 0.10   |
| 4 | 19.708 | 20880    | 3731    | 0.08   |
| 5 | 20.131 | 49175    | 12799   | 0.19   |
| 6 | 20.603 | 64417    | 18721   | 0.22   |
| 7 | 22.247 | 47068    | 4687    | 0.17   |

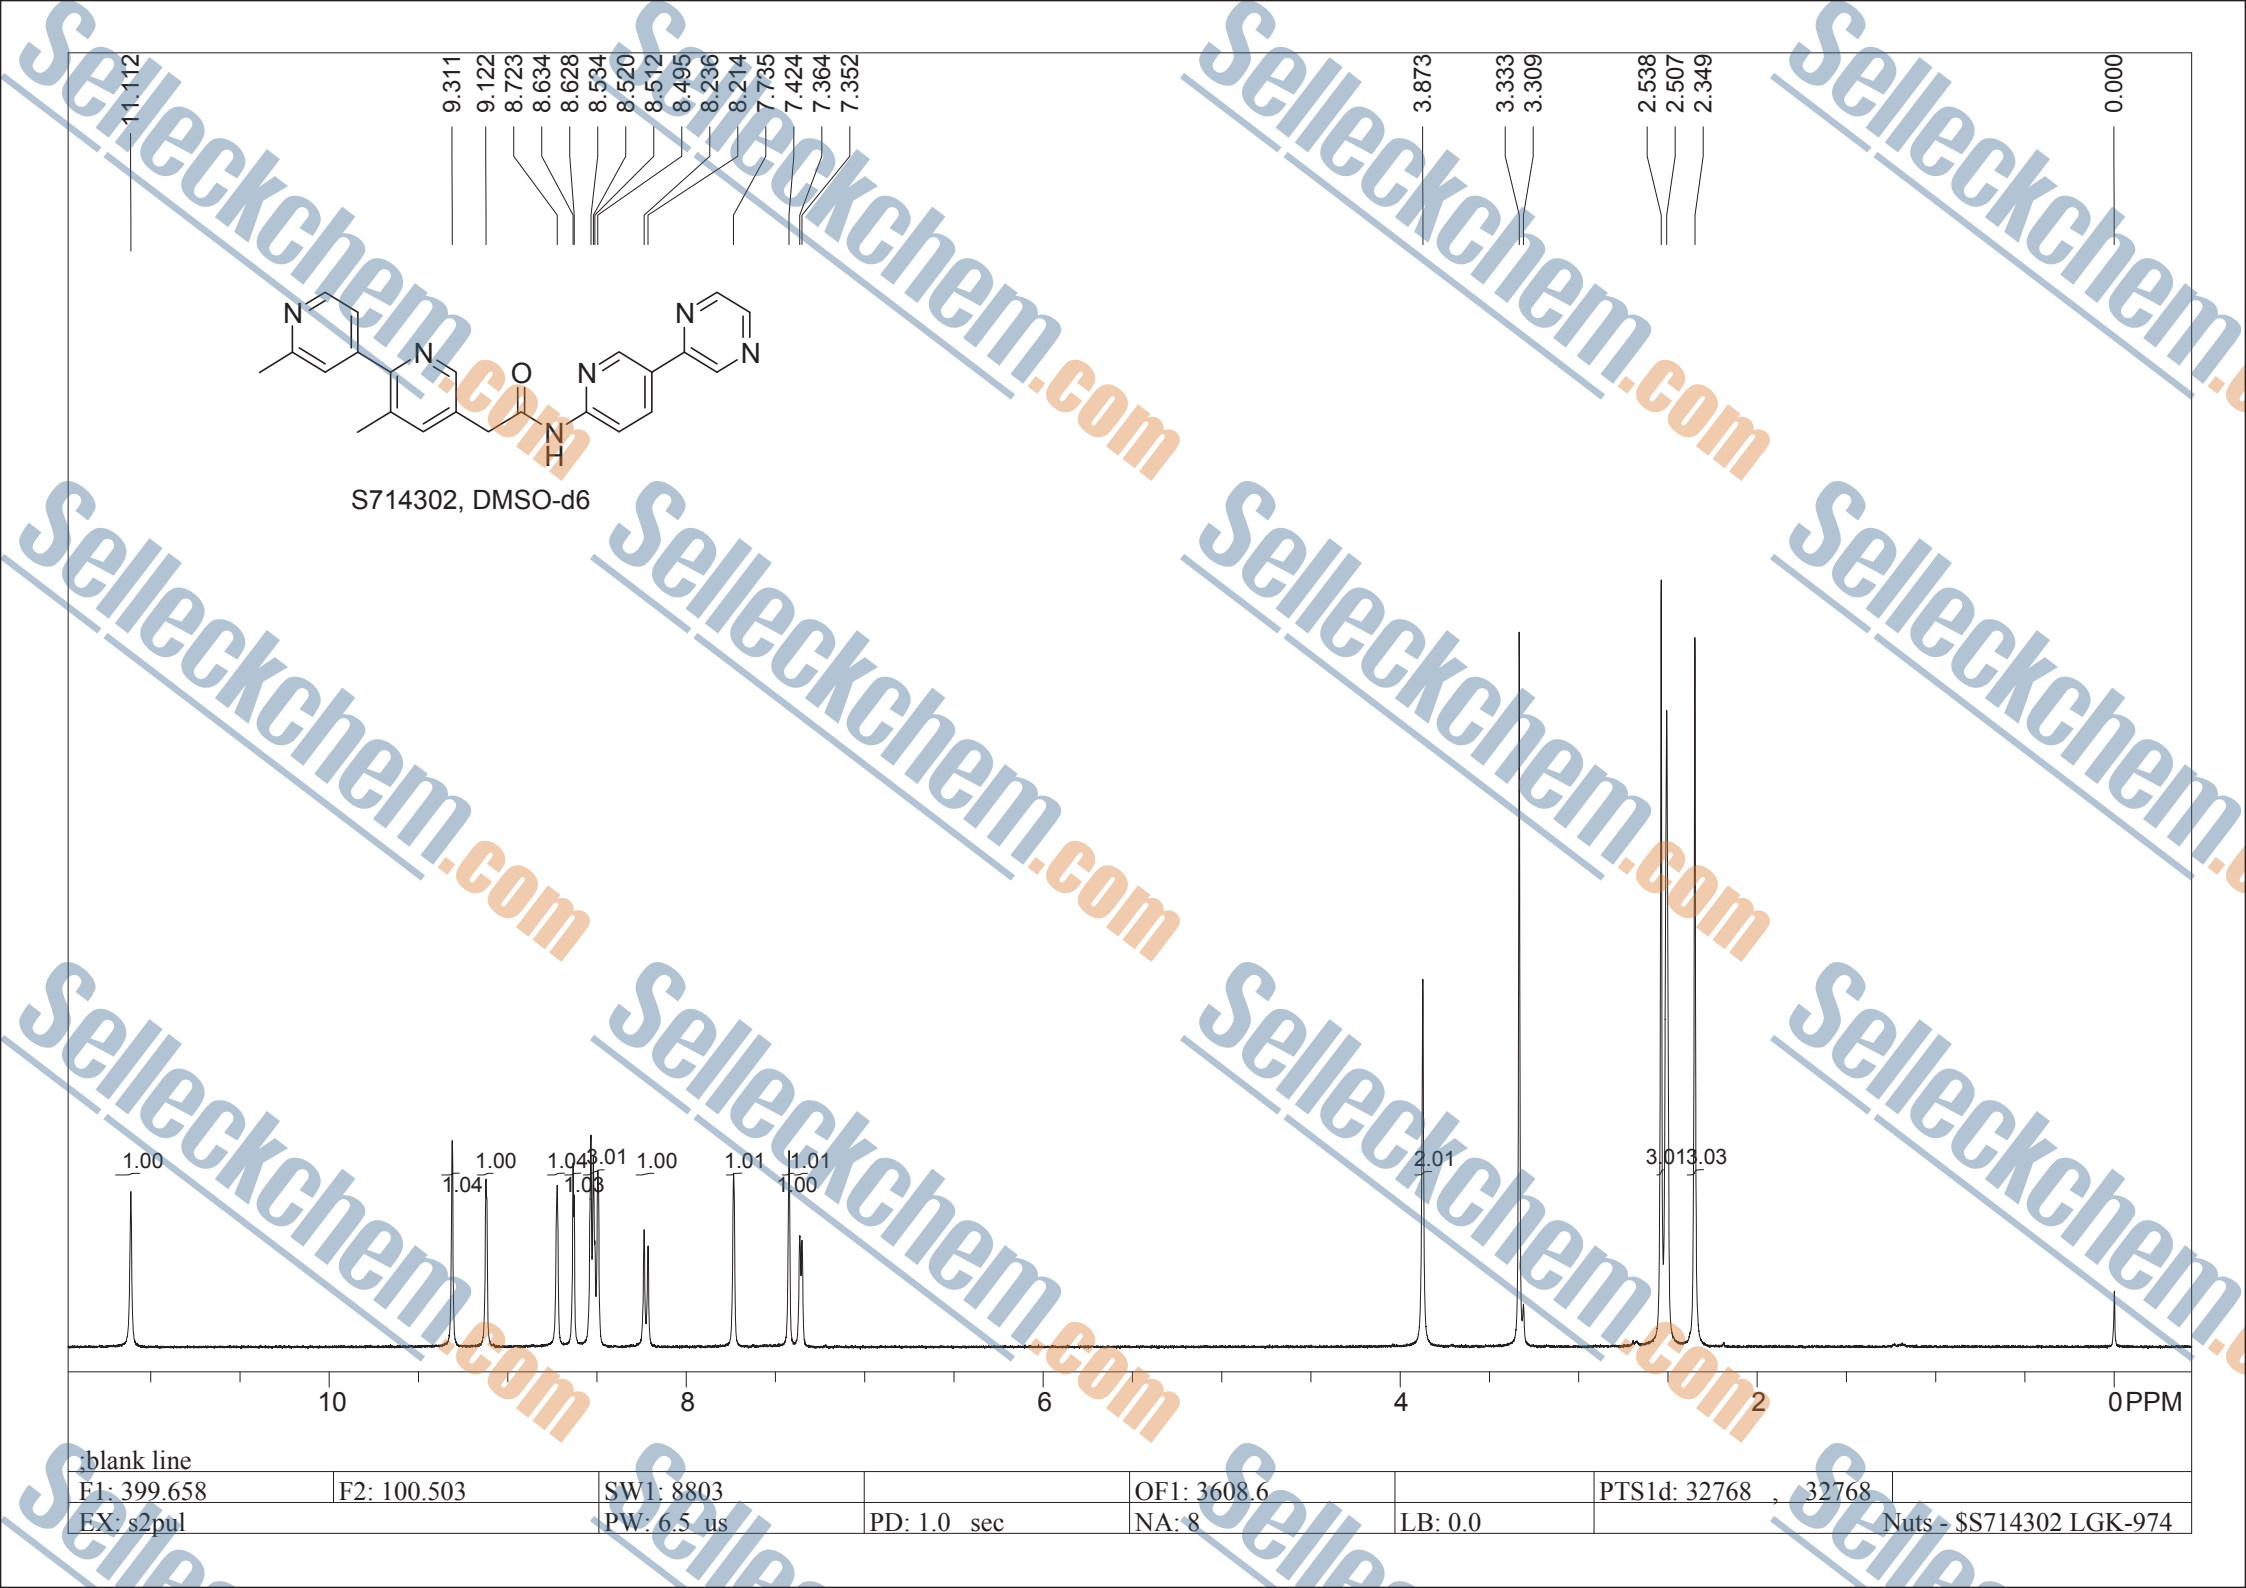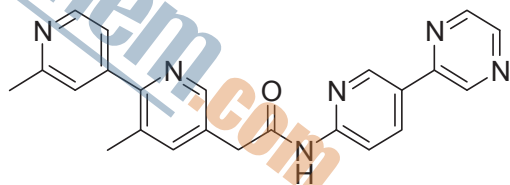

S714302, DMSO-d6

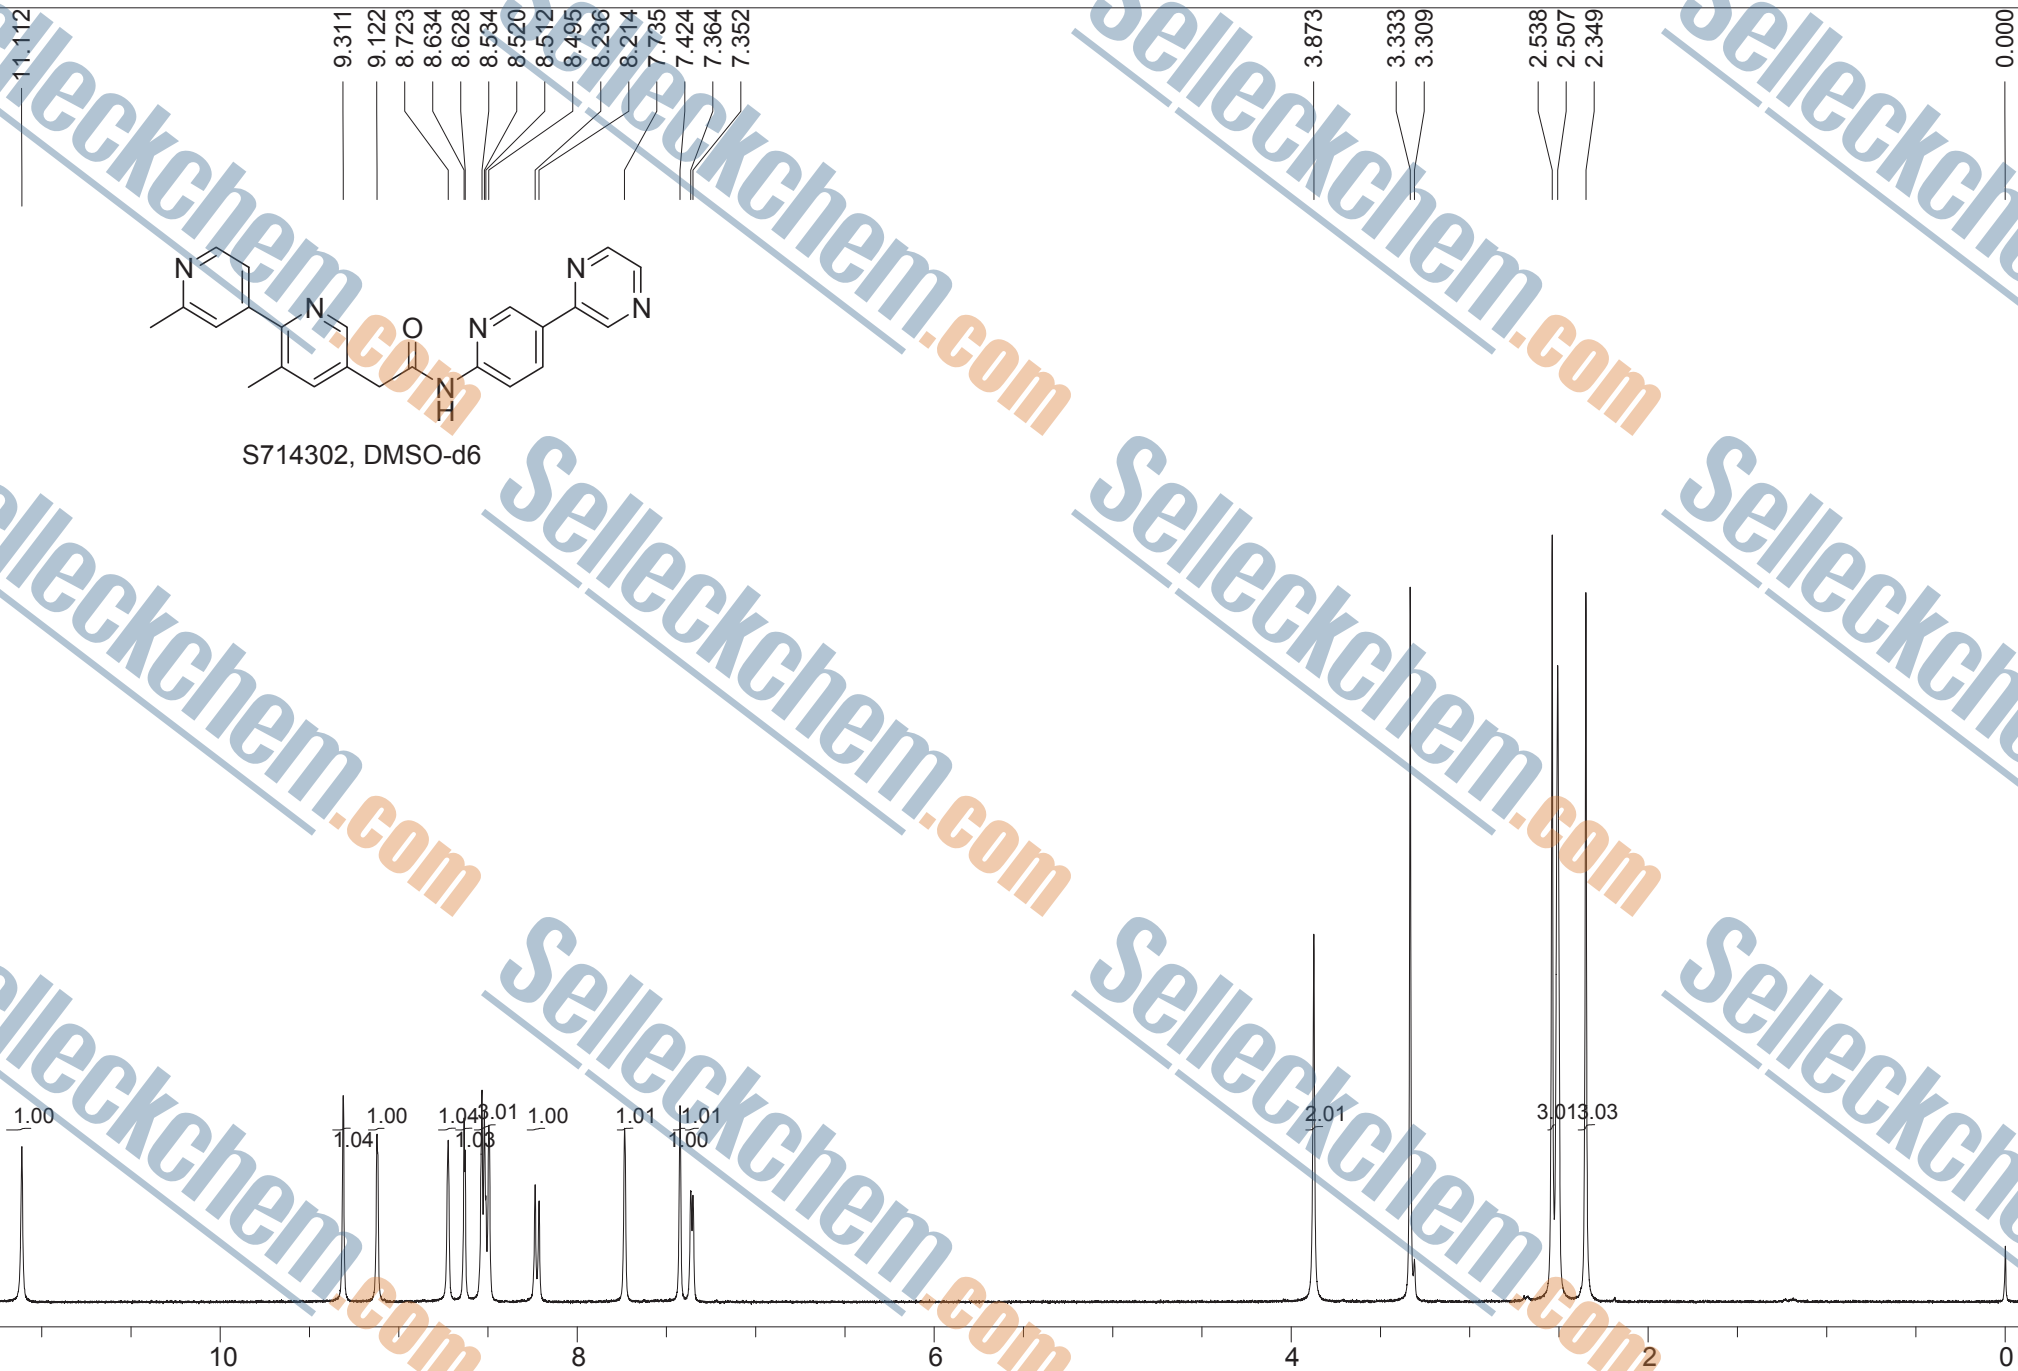

blank line

F1: 399.658

F2: 100.503

SW1: 8803

OF1: 3608.6

PTS1d: 32768 , 32768

EX: s2pul

PW: 6.5 us

PD: 1.0 sec

NA: 8

LB: 0.0

Nuts: \$\$714302 LGK-974

```

=====
Acq. Operator   : SYSTEM                      Seq. Line :    1
Acq. Instrument : 12601c                     Location  : Vial 1

                                           Inj Volume : 5.000 µl
Different Inj Volume from Sample Entry! Actual Inj Volume : 4.000 µl
    
```

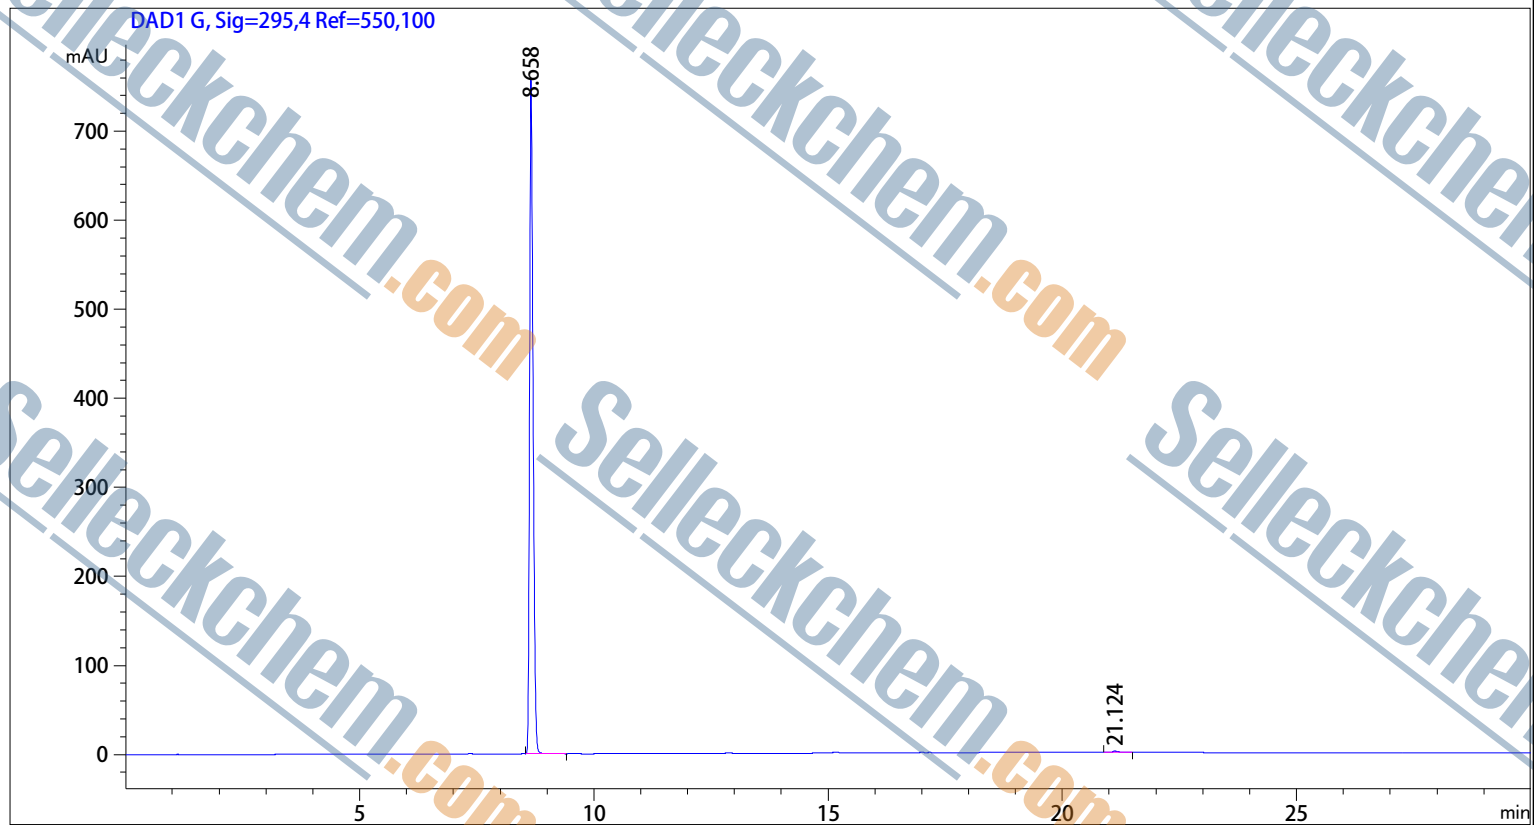

Area Percent Report

```

Sorted By      : Signal
Multiplier     : 1.0000
Dilution       : 1.0000
Use Multiplier & Dilution Factor with ISTDs
    
```

Signal 1: DAD1 G, Sig=280,4 Ref=550,100

| Peak # | RetTime [min] | Type | Width [min] | Area [mAU*s] | Height [mAU] | Area %  |
|--------|---------------|------|-------------|--------------|--------------|---------|
| 1      | 8.658         | BB   | 0.0829      | 4105.10742   | 760.87921    | 99.8493 |
| 2      | 21.124        | BB   | 0.0692      | 6.19768      | 1.31094      | 0.1507  |

Totals : 4111.30510 762.19015

\*\*\* End of Report \*\*\*

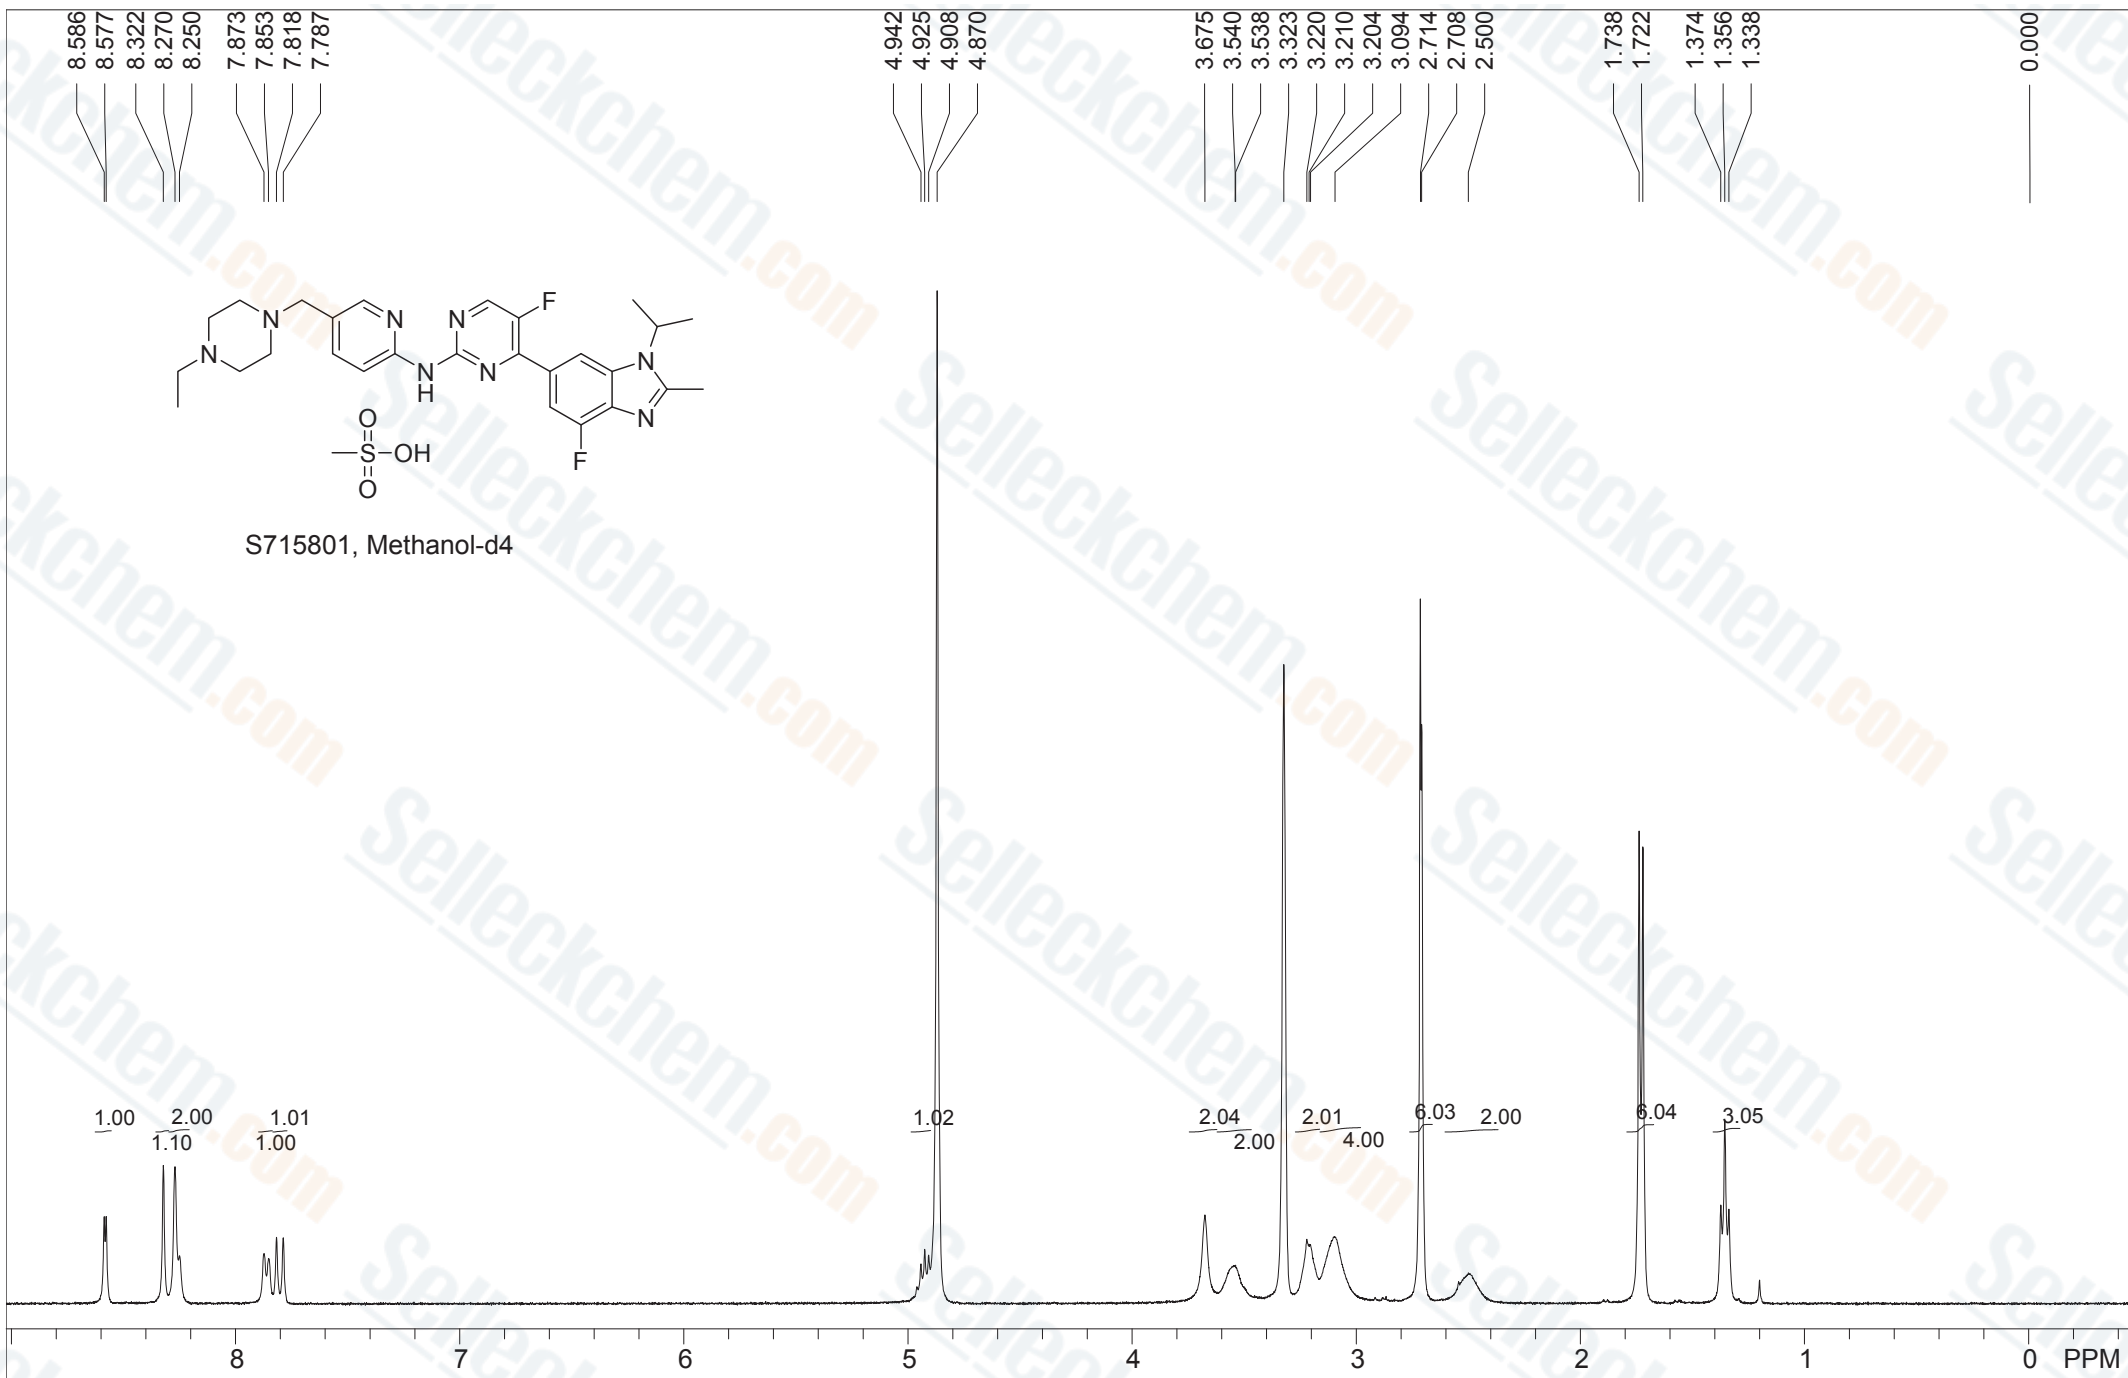

:blank linegaStd proton:blank line

|             |             |             |             |                     |
|-------------|-------------|-------------|-------------|---------------------|
| F1: 399.648 | F2: 100.500 | SW1: 7225   | OF1: 2810.9 | PTS1d: 14803, 16384 |
| EX: s2pul   | PW: 7.2 us  | PD: 2.0 sec | NA: 8       | LB: 0.0             |

Nuts - \$S715801 LY 2835219 Methanol-d4

# SAMPLE INFORMATION

Sample Name: F3872 S715801 LY 2835219  
Sample Type:  
Viat: 1  
Injection #: 2  
Injection Volume: 20.00 ul  
Run Time: 25.0 Minutes  
Sample Set Name:

Acquirde By: System  
Acq. Method Set: Z  
Processing Method: 300  
Channel Name:  
Proc. Chnl. Descr: 300

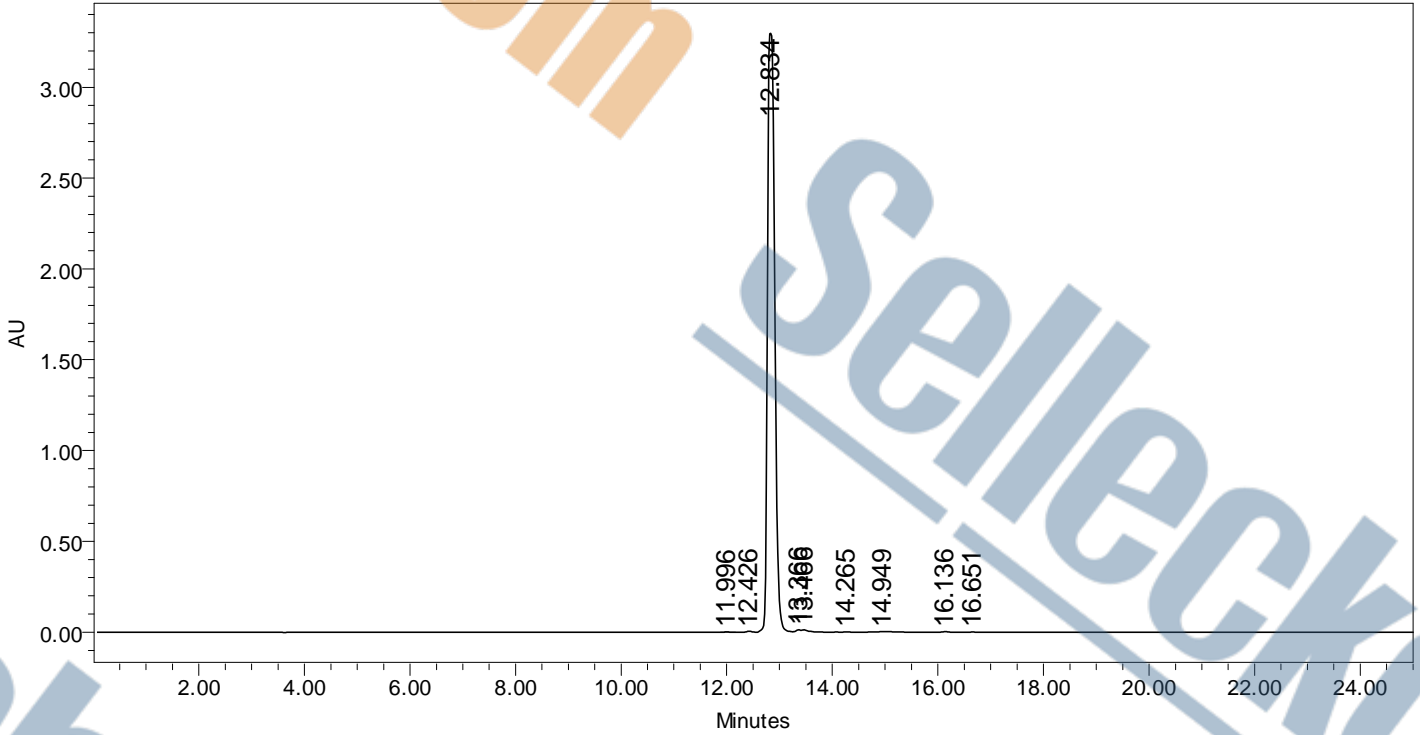

|   | RT     | Area     | Height  | % Area |
|---|--------|----------|---------|--------|
| 1 | 11.996 | 18009    | 2820    | 0.06   |
| 2 | 12.426 | 40614    | 5258    | 0.13   |
| 3 | 12.834 | 31295139 | 3311027 | 99.21  |
| 4 | 13.366 | 68802    | 11360   | 0.22   |
| 5 | 13.466 | 72663    | 11223   | 0.23   |
| 6 | 14.265 | 16753    | 2531    | 0.05   |
| 7 | 14.949 | 4422     | 828     | 0.01   |
| 8 | 16.136 | 17672    | 3031    | 0.06   |
| 9 | 16.651 | 9919     | 1507    | 0.03   |

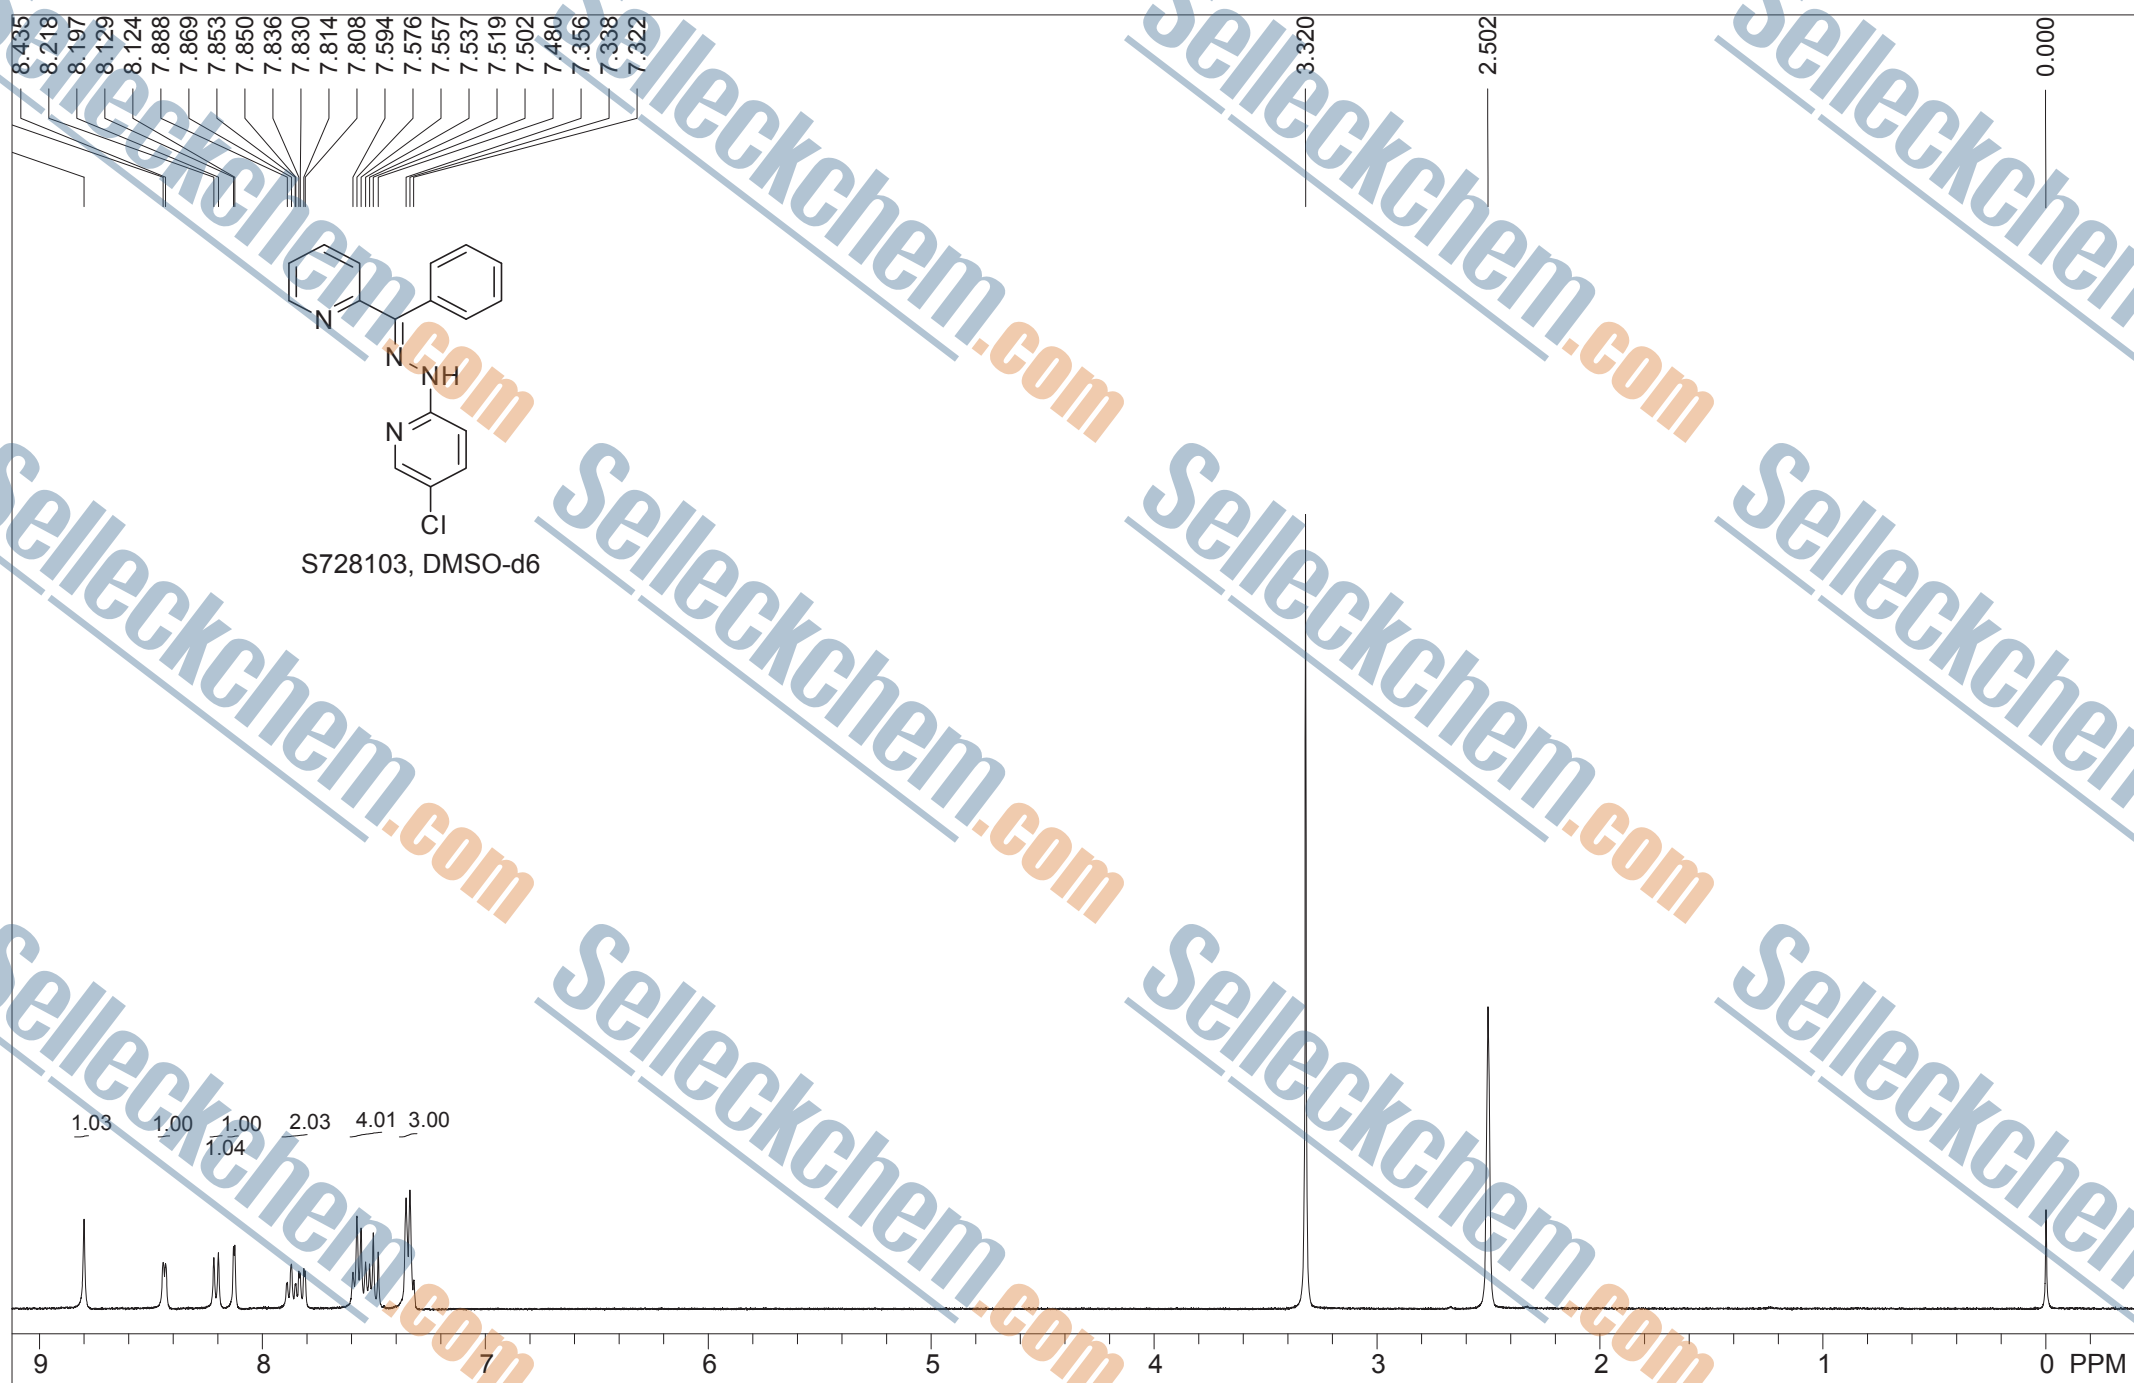

STANDARD PROTON PARAMETERS

|             |             |             |             |                                    |
|-------------|-------------|-------------|-------------|------------------------------------|
| F1: 399.665 | F2: 100.504 | SW1: 8803   | OF1: 3605.7 | PTS1d: 32768 , 32768               |
| EX: s2pul   | PW: 6.5 us  | PD: 1.0 sec | NA: 8       | LB: 0.0                            |
|             |             |             |             | Nuts - S728103 JIB-04 (NSC 693627) |

```

=====
Acq. Operator   : SYSTEM                      Seq. Line :    5
Acq. Instrument : 12601c                     Location  : Vial 56

                                           Inj Volume : 5.000 µl
Different Inj Volume from Sample Entry! Actual Inj Volume : 1.000 µl
=====
    
```

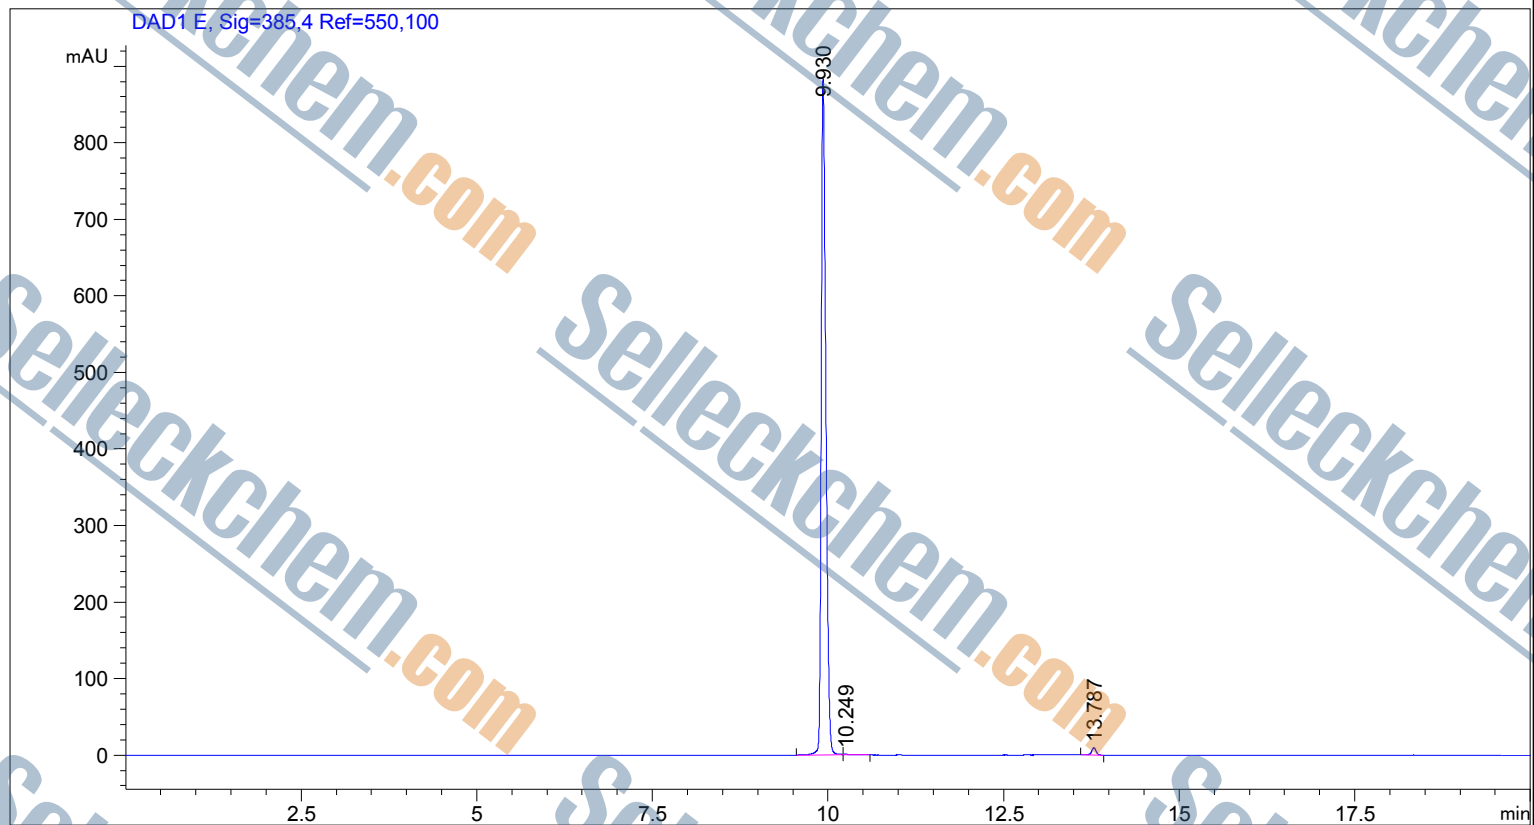

Area Percent Report

```

=====
Sorted By      :      Signal
Multiplier     :      1.0000
Dilution      :      1.0000
Use Multiplier & Dilution Factor with ISTDs
    
```

Signal 1: DAD1 E, Sig=385,4 Ref=550,100

| Peak # | RetTime [min] | Type | Width [min] | Area [mAU*s] | Height [mAU] | Area %  |
|--------|---------------|------|-------------|--------------|--------------|---------|
| 1      | 9.930         | BV   | 0.0696      | 4056.74316   | 883.45605    | 98.8486 |
| 2      | 10.249        | VB   | 0.0862      | 6.94115      | 1.07736      | 0.1691  |
| 3      | 13.787        | BB   | 0.0666      | 40.31105     | 9.29686      | 0.9822  |

Totals : 4103.99537 893.83028

=====  
\*\*\* End of Report \*\*\*



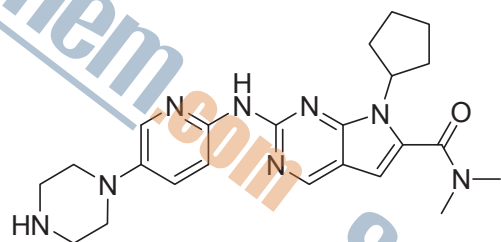

S744002, DMSO-d6

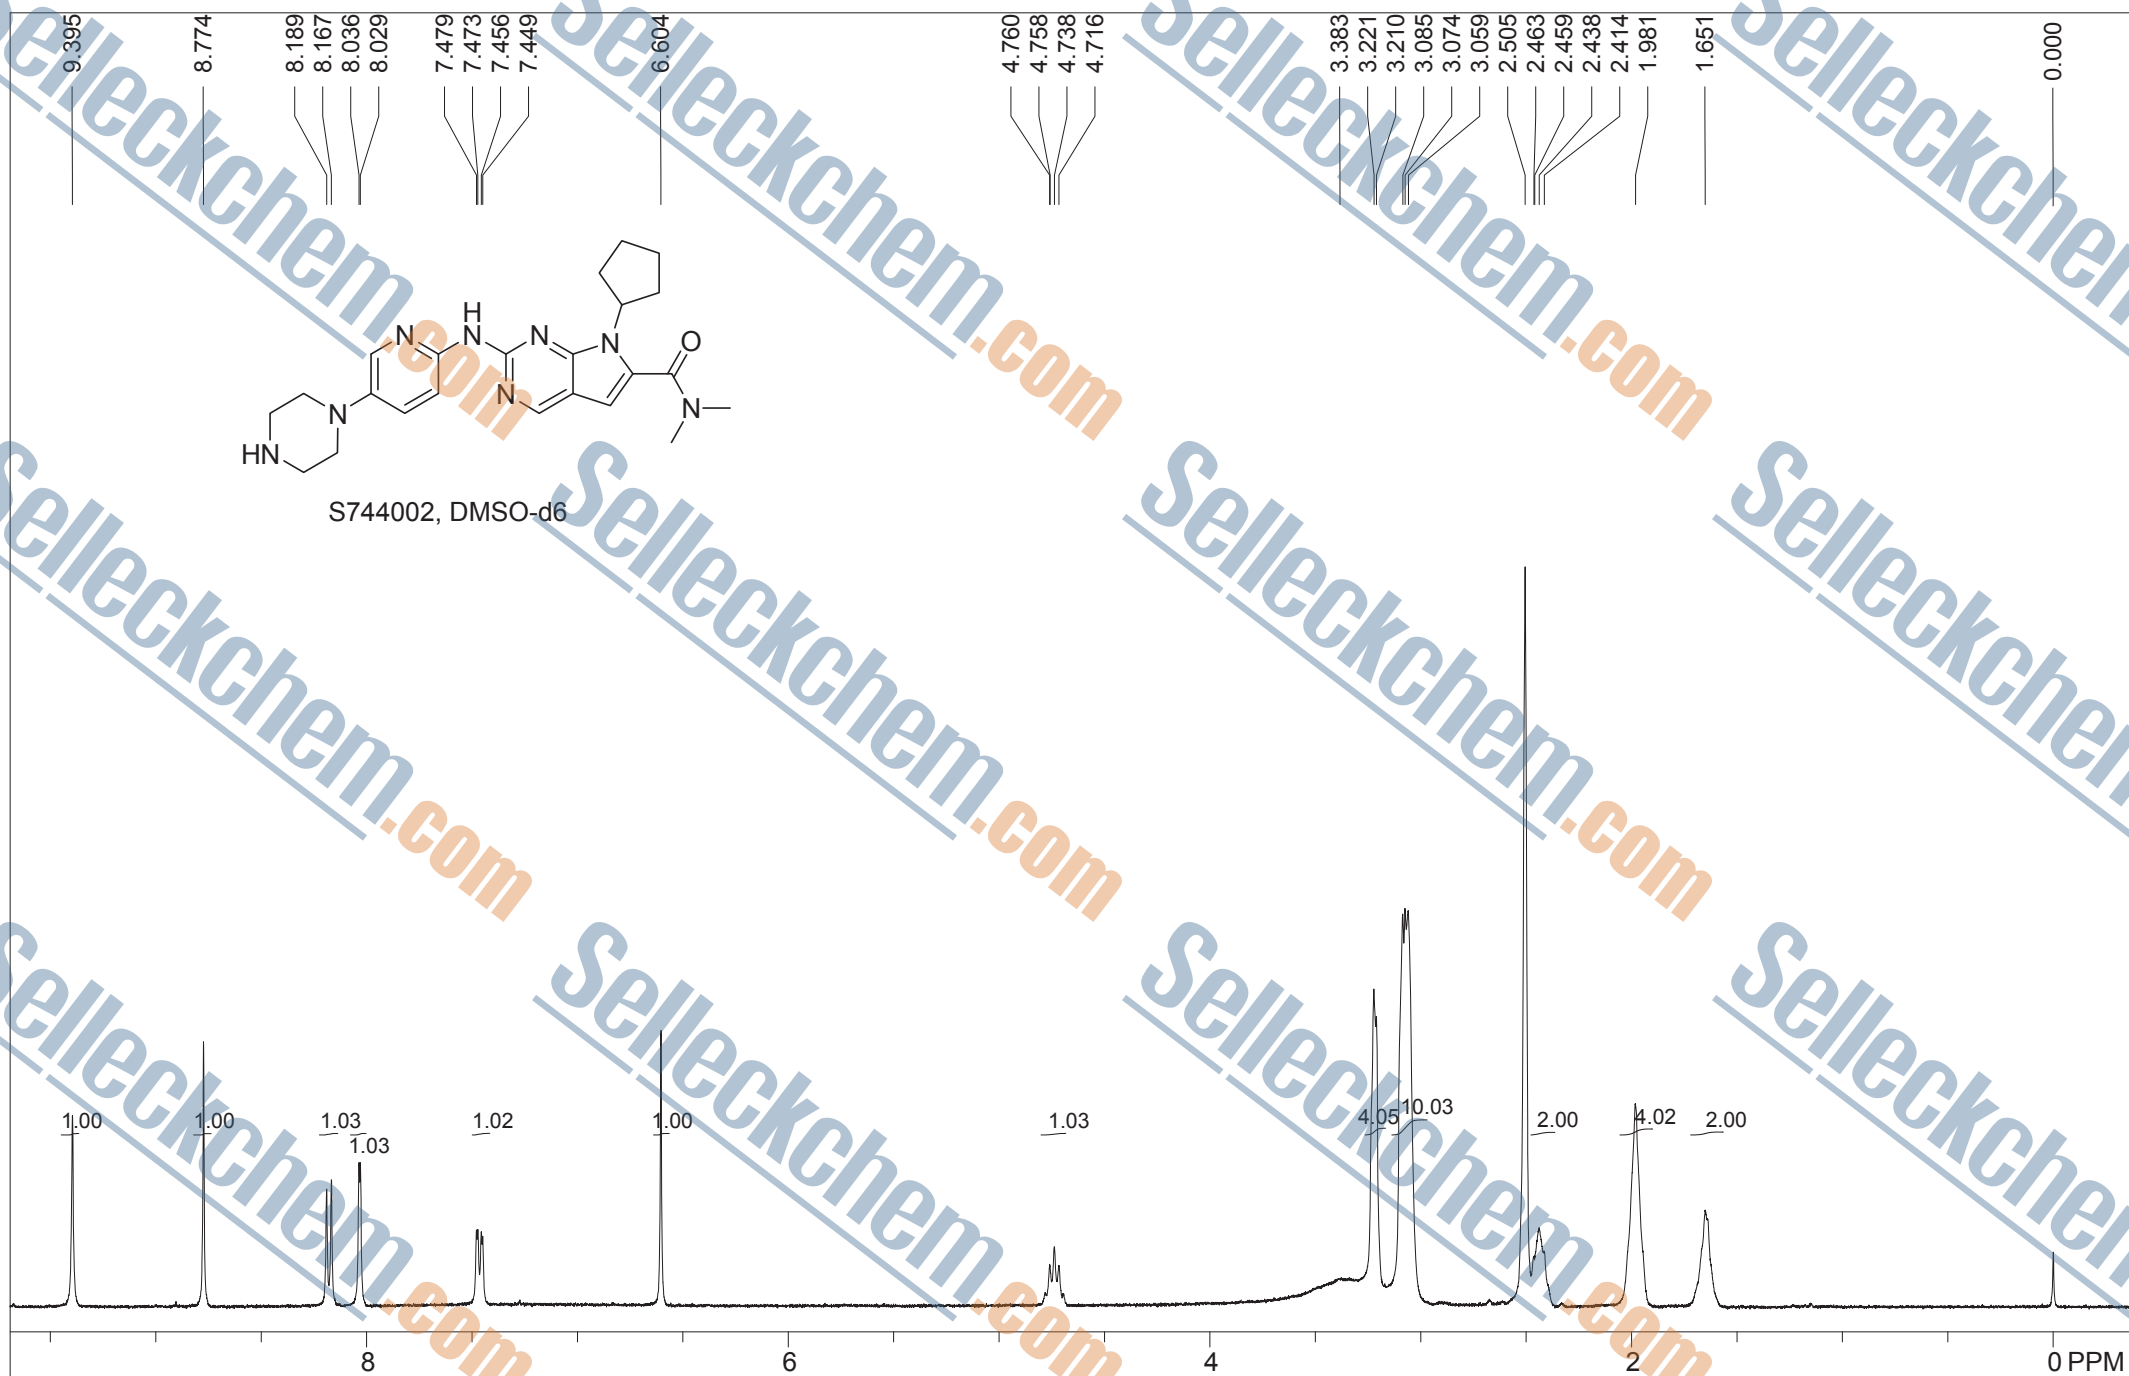

STANDARD PROTON PARAMETERS

|             |             |             |             |                      |
|-------------|-------------|-------------|-------------|----------------------|
| F1: 399.658 | F2: 100.503 | SW1: 8803   | OF1: 3607.8 | PTS1d: 32768 , 32768 |
| EX: s2pul   | PW: 6.5 us  | PD: 1.0 sec | NA: 8       | LB: 0.0              |

Nuts - S744002 LEE011-2

# SAMPLE INFORMATION

Sample Name: F4655 S744002 LEE011-2  
Sample Type:  
Viat: 1  
Injection #: 7  
Injection Volume: 20.00 ul  
Run Time: 30.0 Minutes  
Sample Set Name:

Acquirde By: System  
Acq. Method Set: Z2  
Processing Method: 276  
Channel Name:  
Proc. Chnl. Descr: 276

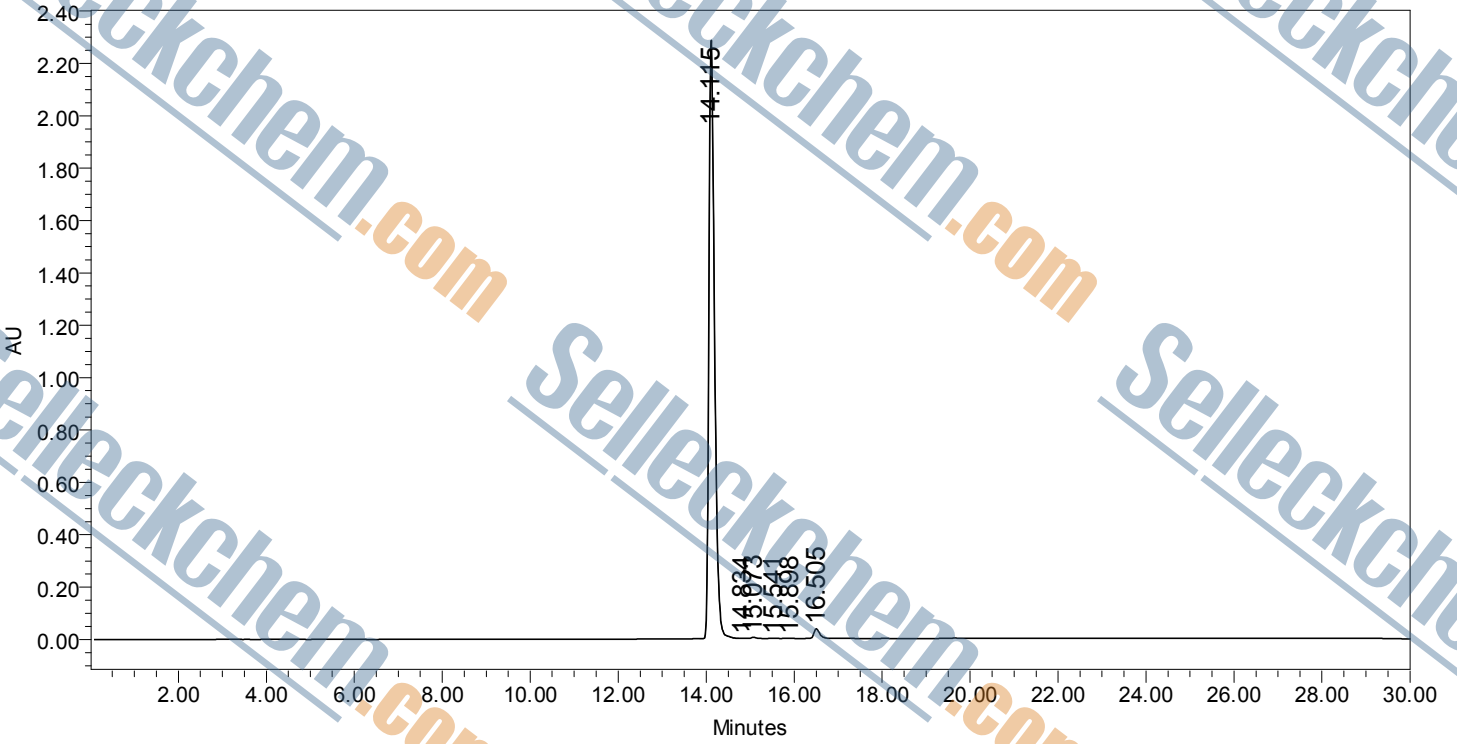

|   | RT     | Area     | Height  | % Area |
|---|--------|----------|---------|--------|
| 1 | 14.115 | 20520532 | 2284260 | 99.05  |
| 2 | 14.834 | 6359     | 783     | 0.03   |
| 3 | 15.073 | 22309    | 3372    | 0.11   |
| 4 | 15.541 | 6485     | 860     | 0.03   |
| 5 | 15.898 | 8647     | 1248    | 0.04   |
| 6 | 16.505 | 342487   | 37002   | 0.74   |

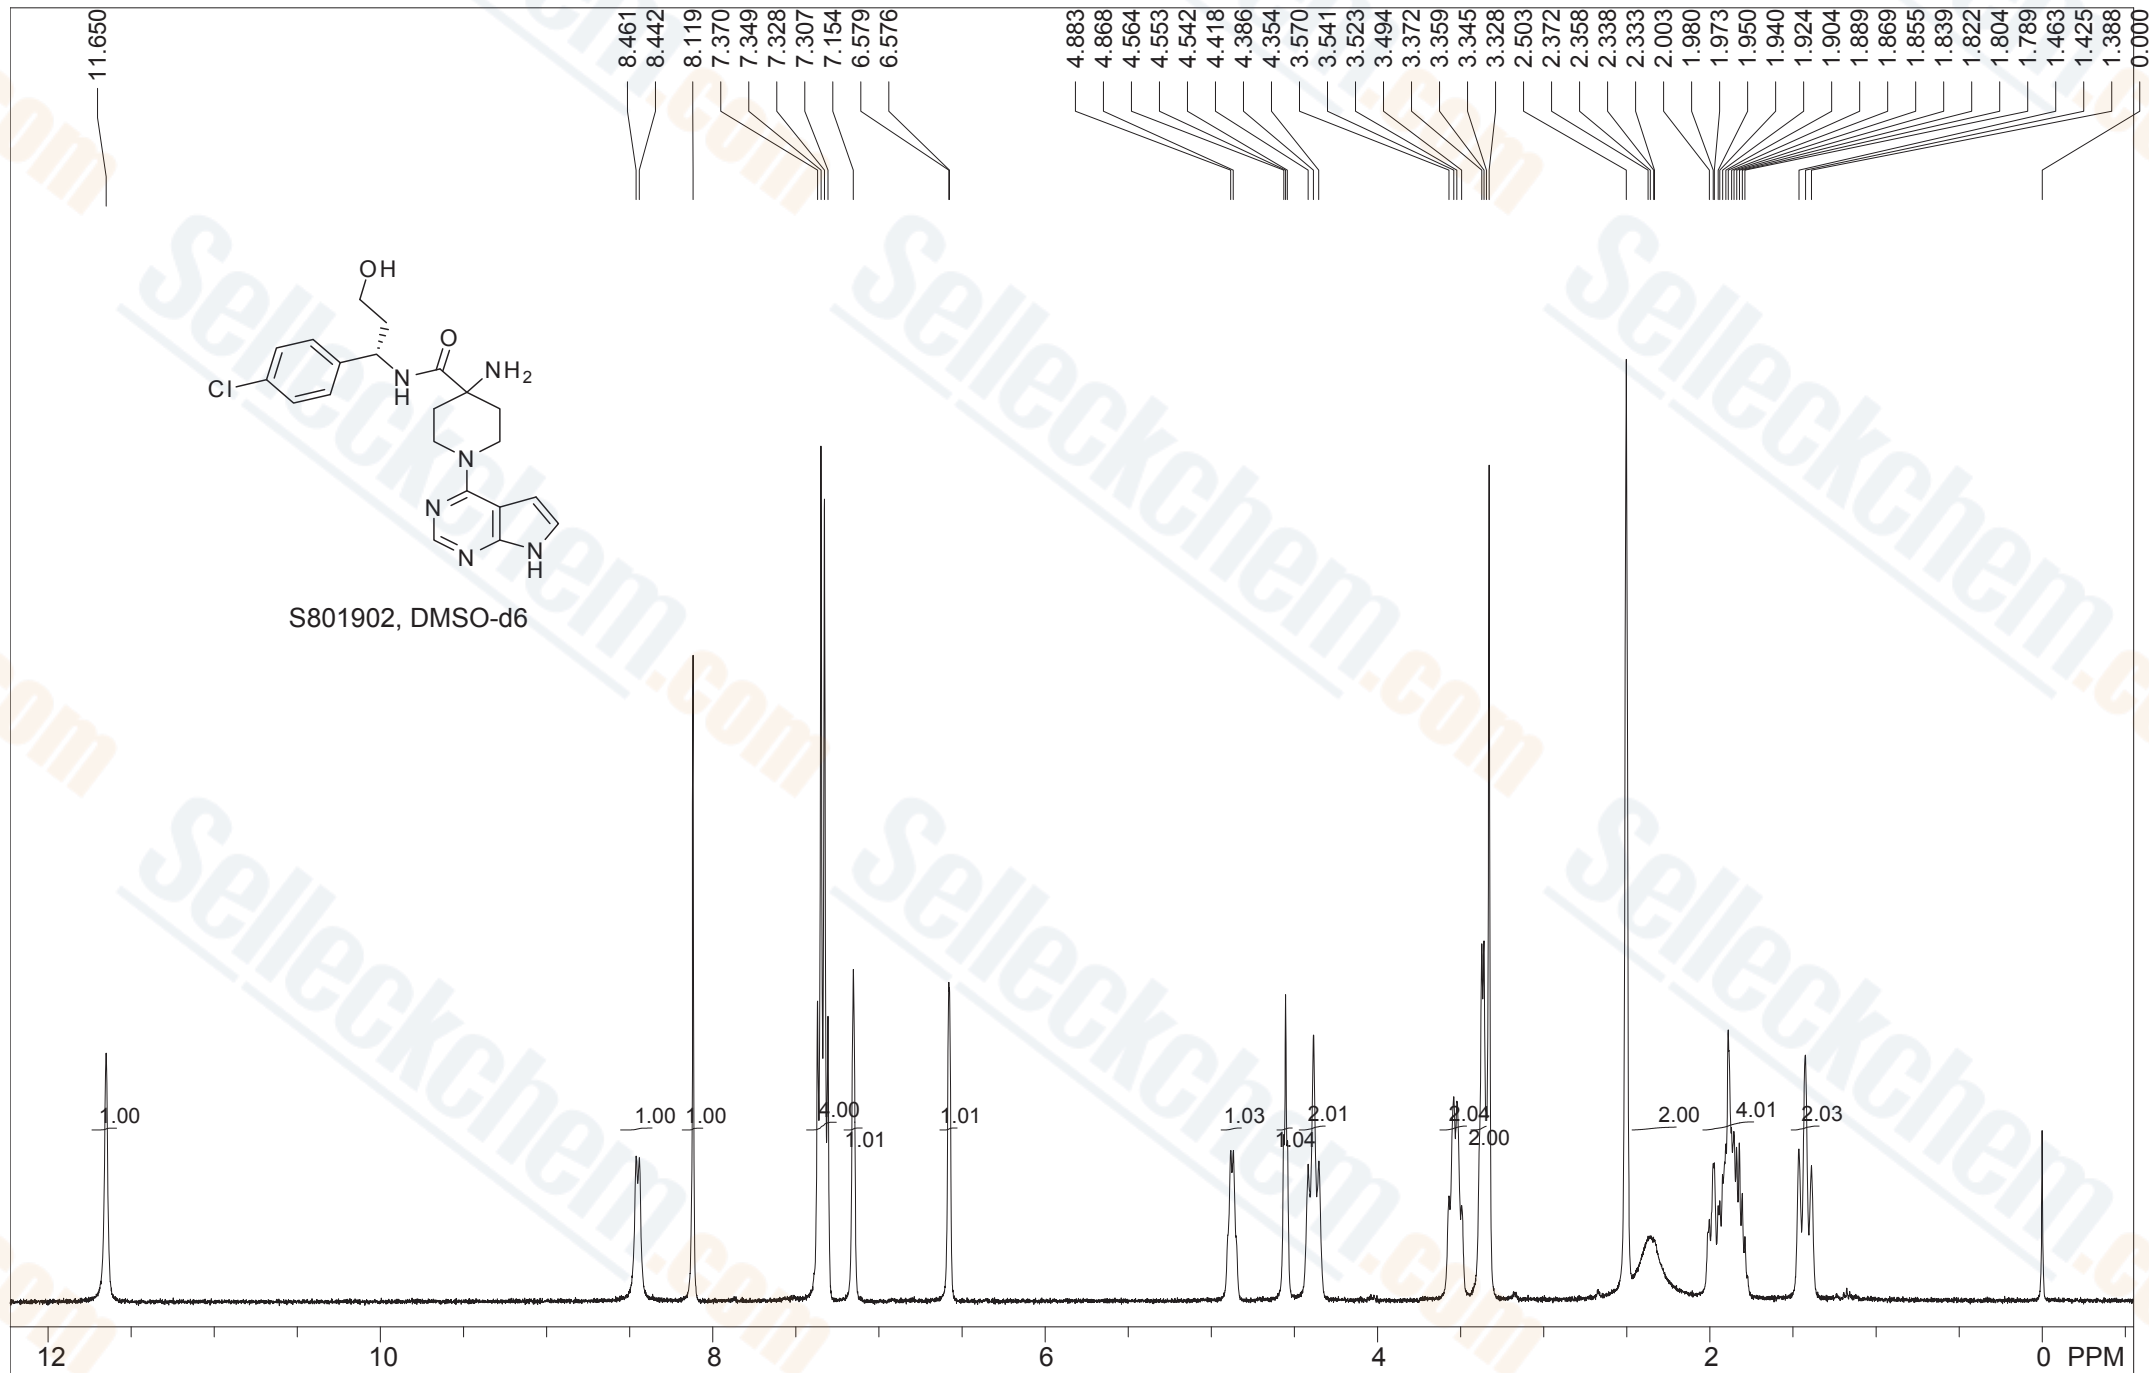

:blank linegaStd proton:blank line

|             |             |             |             |                      |
|-------------|-------------|-------------|-------------|----------------------|
| F1: 399.648 | F2: 100.500 | SW1: 7225   | OF1: 2812.7 | PTS1d: 14803 , 16384 |
| EX: s2pul   | PW: 7.2 us  | PD: 2.0 sec | NA: 8       | LB: 0.0              |

Nuts - \$S801902 AZD5363

# SAMPLE INFORMATION

Sample Name: F3687 S801902 AZD5363  
Sample Type:  
Viat: 1  
Injection #: 1  
Injection Volume: 20.00 ul  
Run Time: 30.0 Minutes  
Sample Set Name:

Acquirde By: System  
Acq. Method Set: Z  
Processing Method: 283  
Channel Name:  
Proc. Chnl. Descr: 283

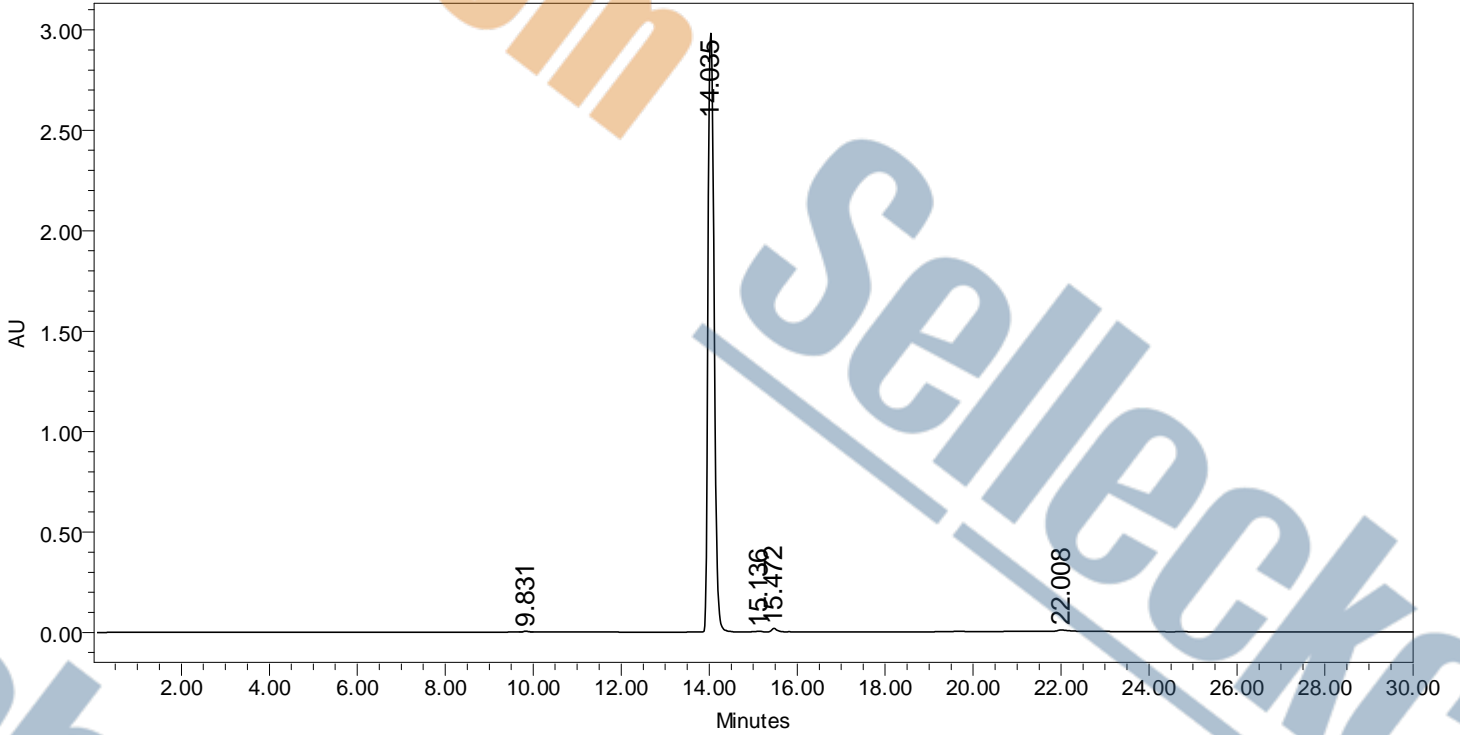

|   | RT     | Area     | Height  | % Area |
|---|--------|----------|---------|--------|
| 1 | 9.831  | 17586    | 2554    | 0.06   |
| 2 | 14.035 | 28384940 | 2986760 | 99.26  |
| 3 | 15.136 | 14750    | 2243    | 0.05   |
| 4 | 15.472 | 140708   | 17164   | 0.49   |
| 5 | 22.008 | 39065    | 4515    | 0.14   |

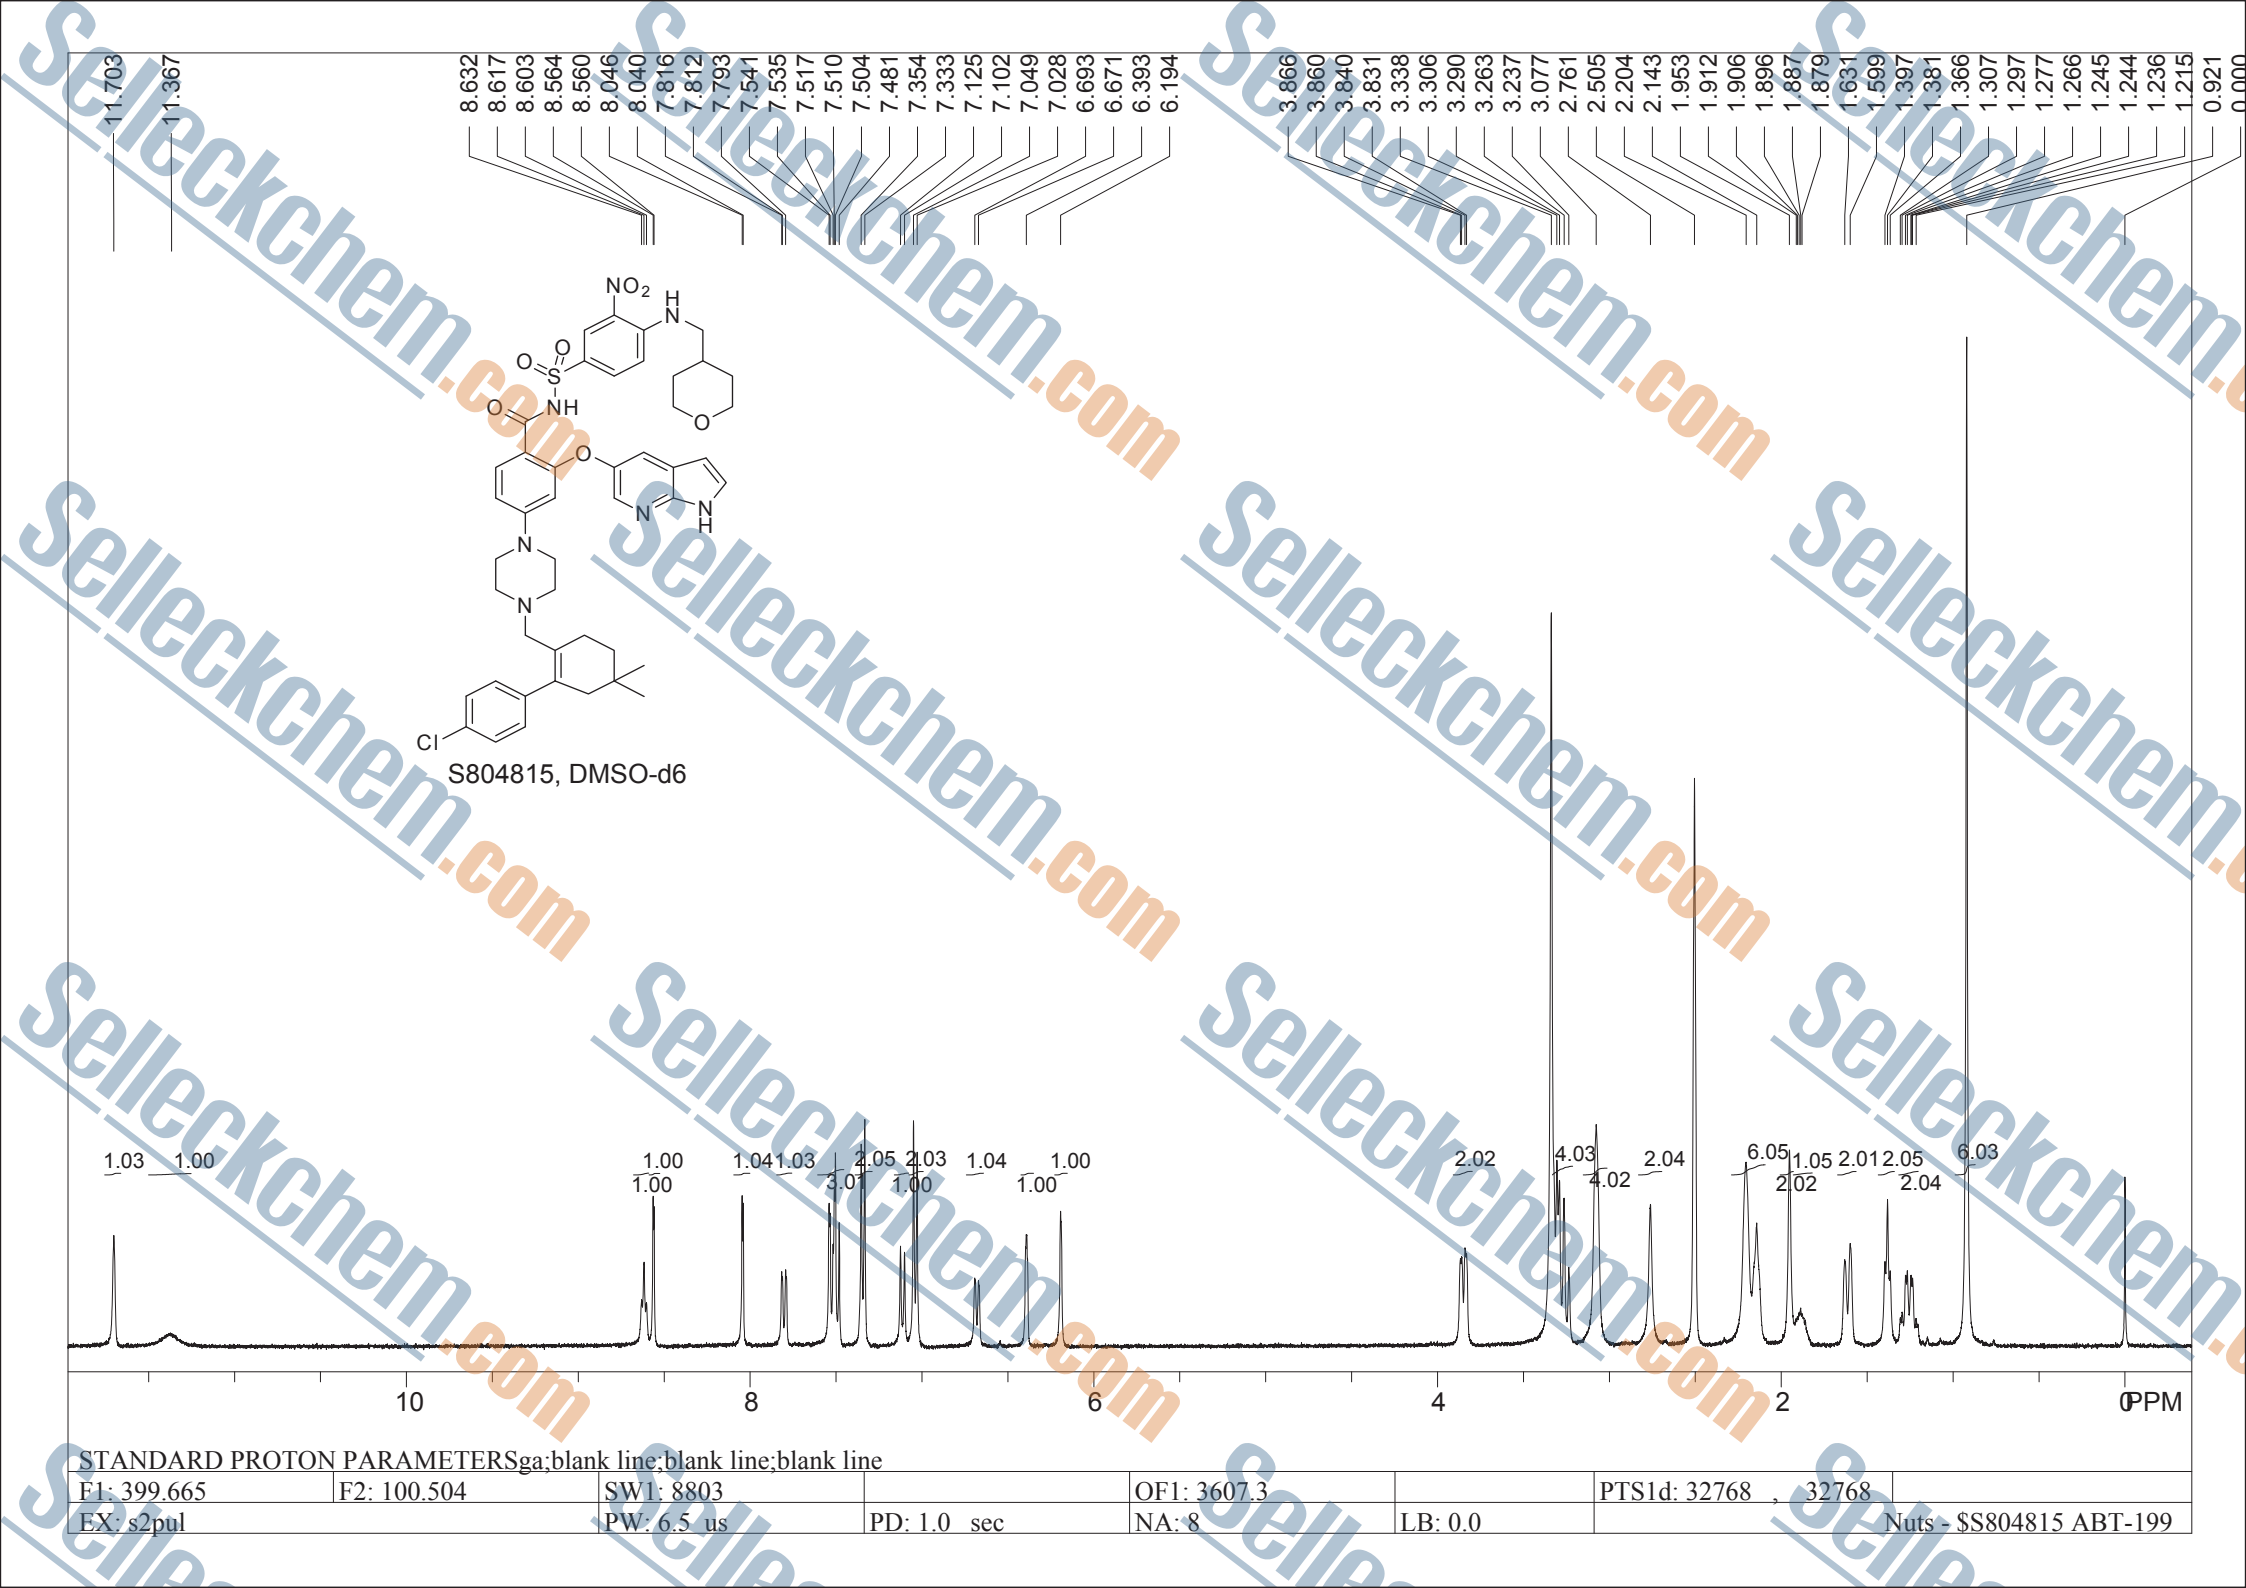

STANDARD PROTON PARAMETERSga:blank line:blank line:blank line

|             |             |             |             |                      |
|-------------|-------------|-------------|-------------|----------------------|
| F1: 399.665 | F2: 100.504 | SW1: 8803   | OF1: 3607.3 | PTS1d: 32768 , 32768 |
| EX: s2pul   | PW: 6.5 us  | PD: 1.0 sec | NA: 8       | LB: 0.0              |

Nuts - SS804815 ABT-199

```

=====
Acq. Operator   : SYSTEM                      Seq. Line :    5
Acq. Instrument : 12601c                     Location  : Vial 76

                                           Inj Volume : 2.000 µl
Different Inj Volume from Sample Entry! Actual Inj Volume : 3.000 µl
    
```

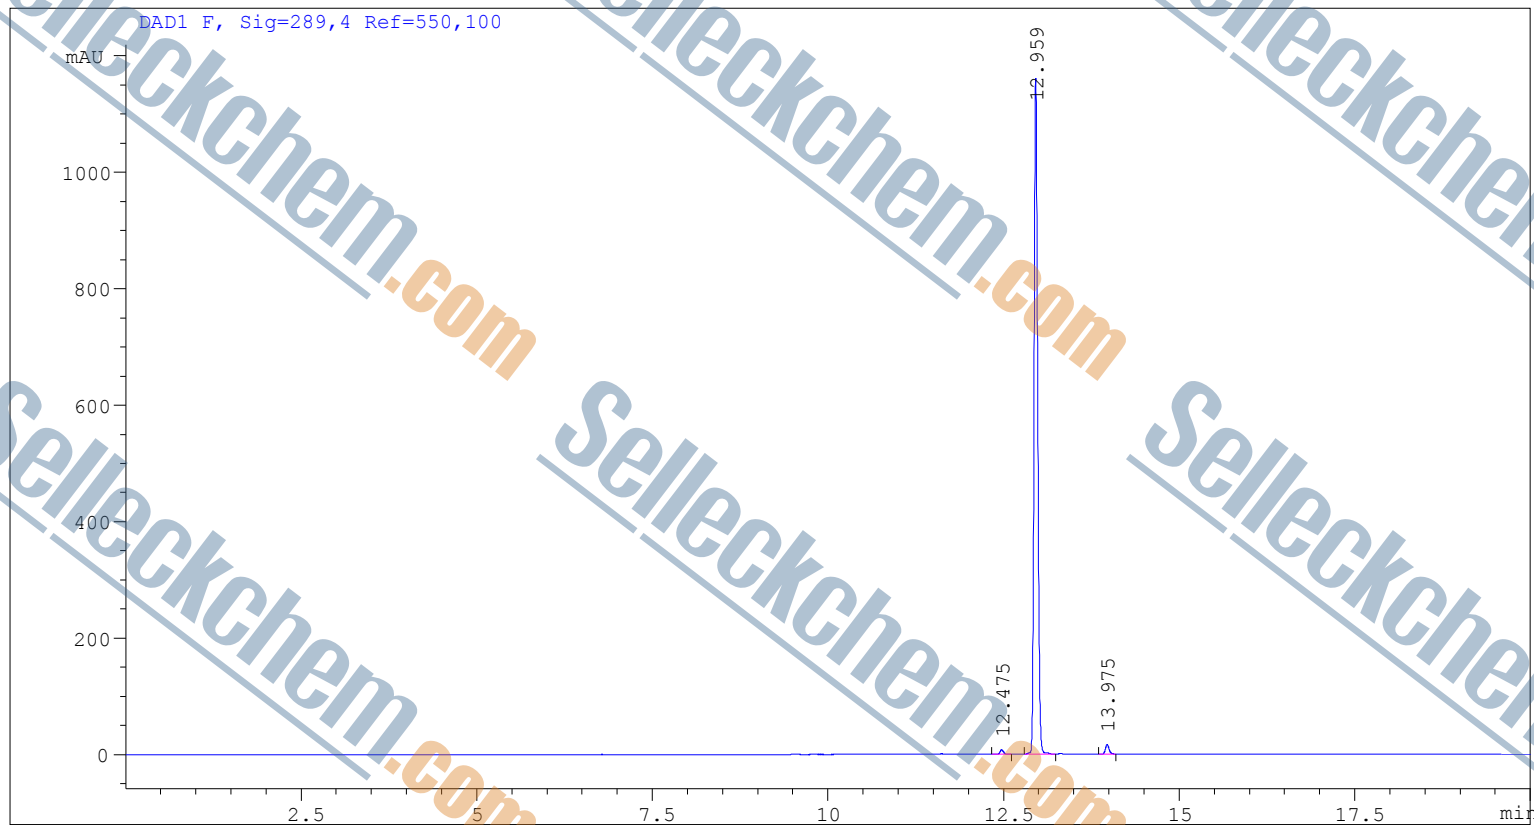

Area Percent Report

```

Sorted By      : Signal
Multiplier     : 1.0000
Dilution       : 1.0000
Use Multiplier & Dilution Factor with ISTDs
    
```

Signal 1: DAD1 F, Sig=289,4 Ref=550,100

| Peak # | RetTime [min] | Type | Width [min] | Area [mAU*s] | Height [mAU] | Area %  |
|--------|---------------|------|-------------|--------------|--------------|---------|
| 1      | 12.475        | BB   | 0.0551      | 27.69088     | 7.77356      | 0.6589  |
| 2      | 12.959        | VB   | 0.0555      | 4126.53809   | 1161.14734   | 97.8932 |
| 3      | 13.975        | BB   | 0.0561      | 60.94711     | 16.68709     | 1.4479  |

Totals : 4215.17608 1185.60798

\*\*\* End of Report \*\*\*

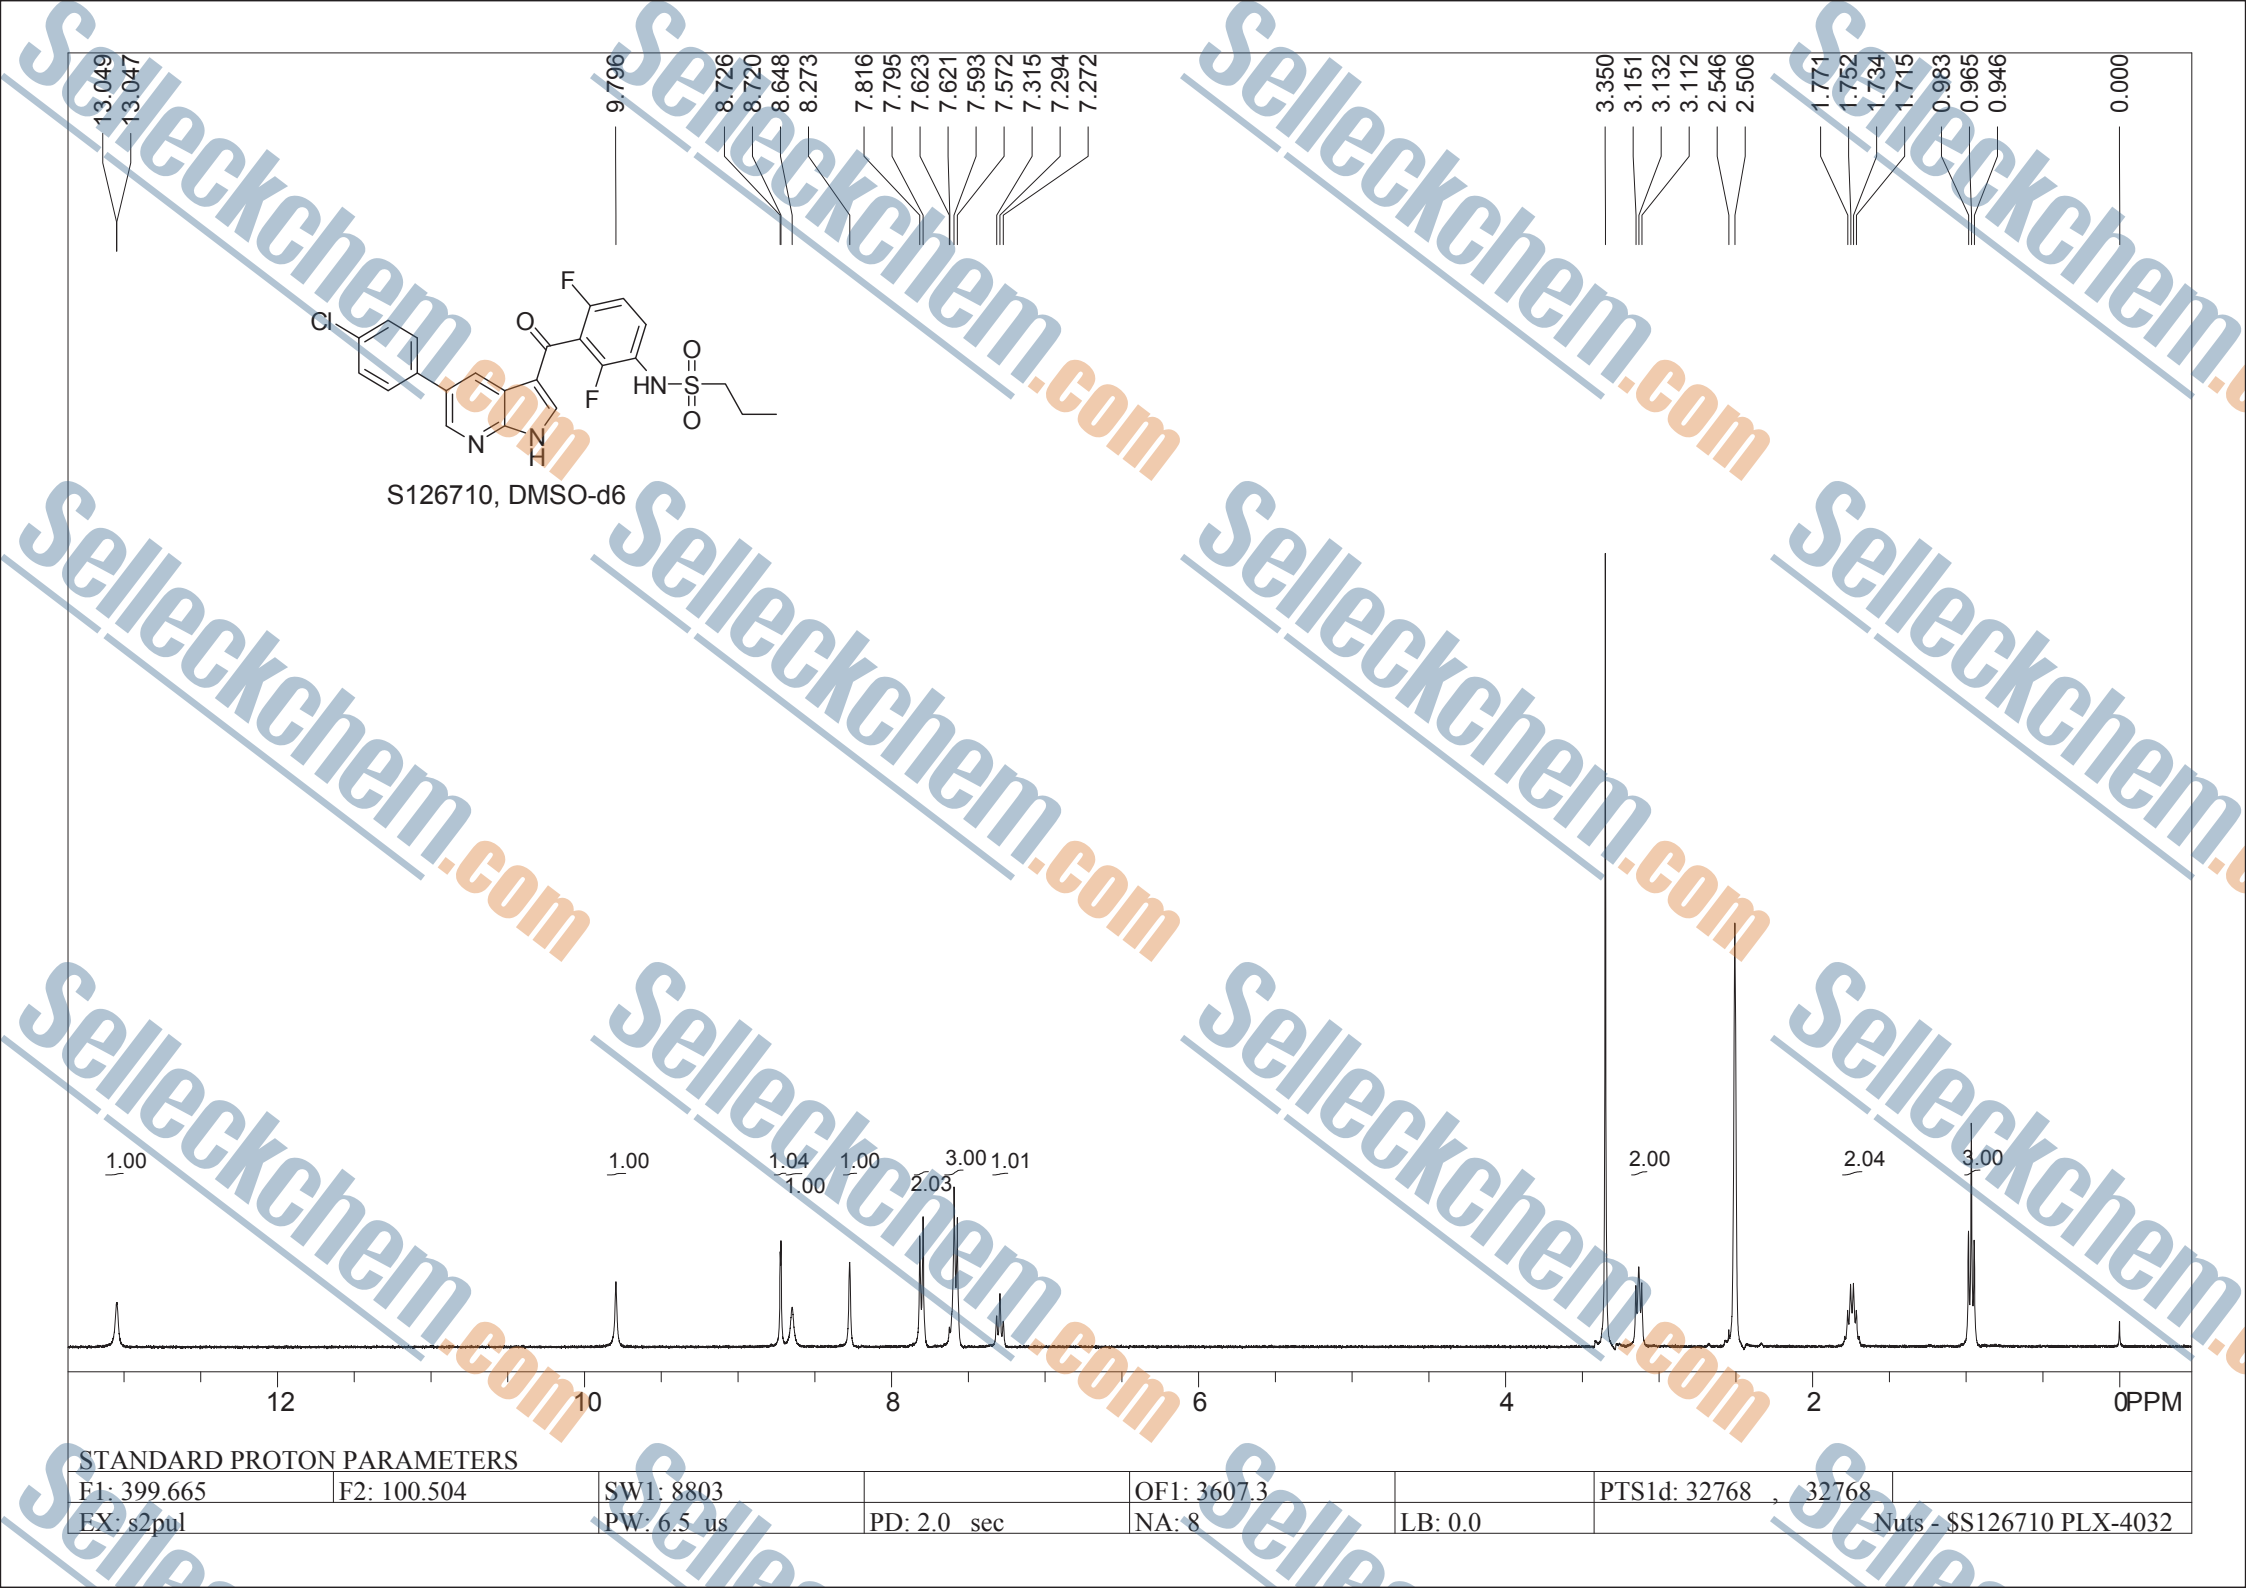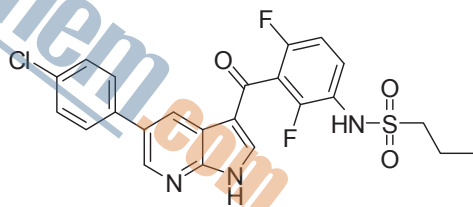

S126710, DMSO-d6

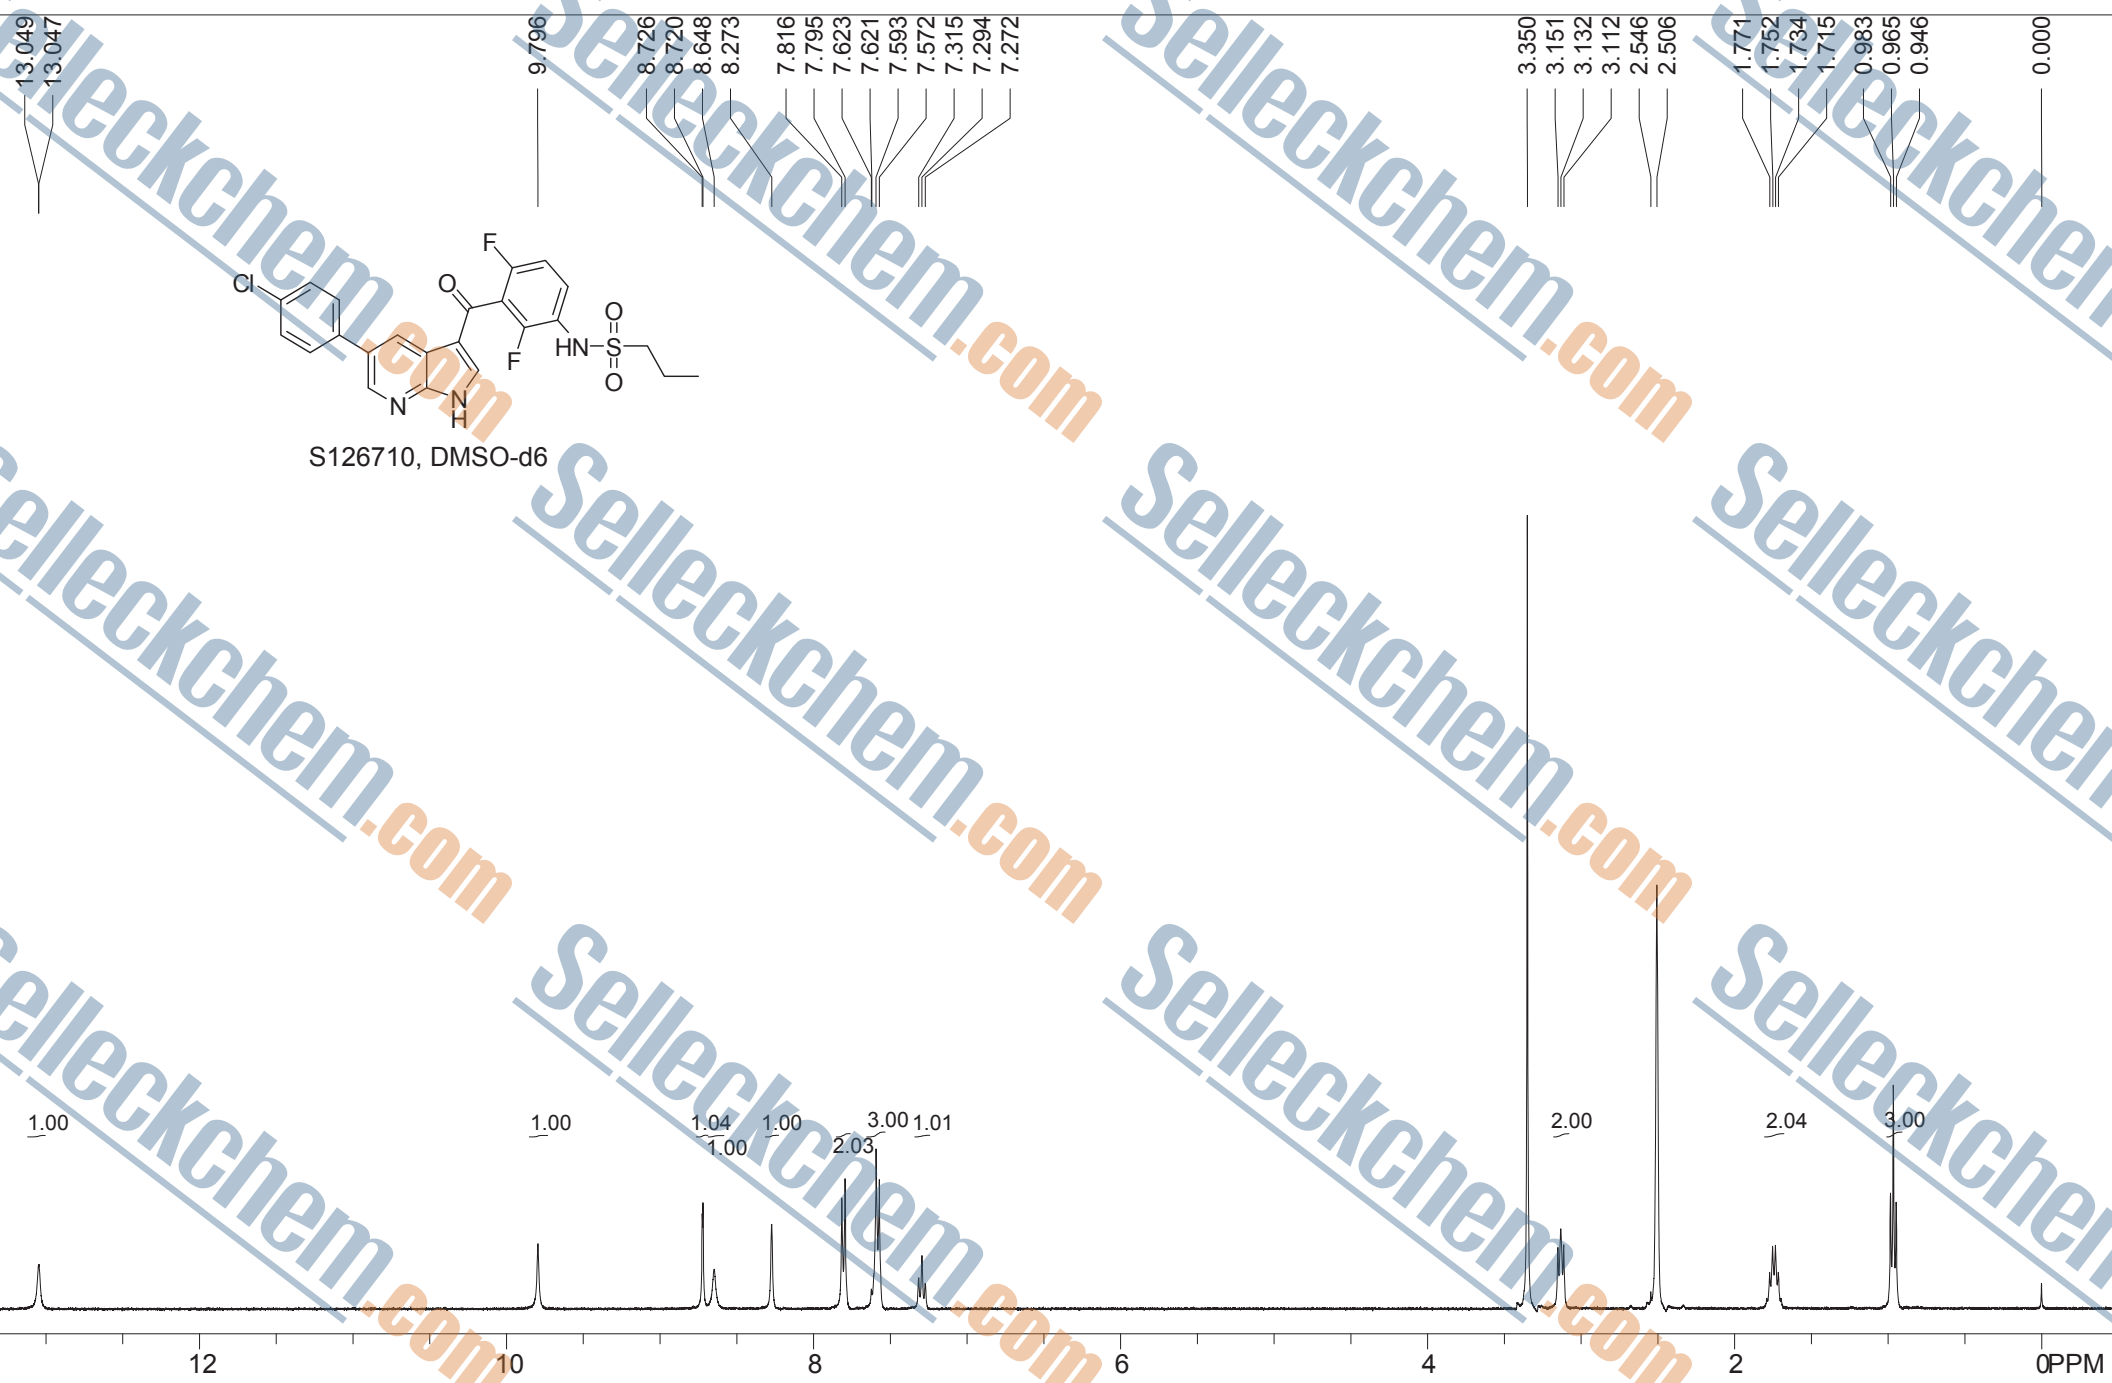

STANDARD PROTON PARAMETERS

|             |             |             |             |                          |
|-------------|-------------|-------------|-------------|--------------------------|
| F1: 399.665 | F2: 100.504 | SW1: 8803   | OF1: 3607.3 | PTS1d: 32768 , 32768     |
| EX: s2pul   | PW: 6.5 us  | PD: 2.0 sec | NA: 8       | LB: 0.0                  |
|             |             |             |             | Nuts - SS126710 PLX-4032 |

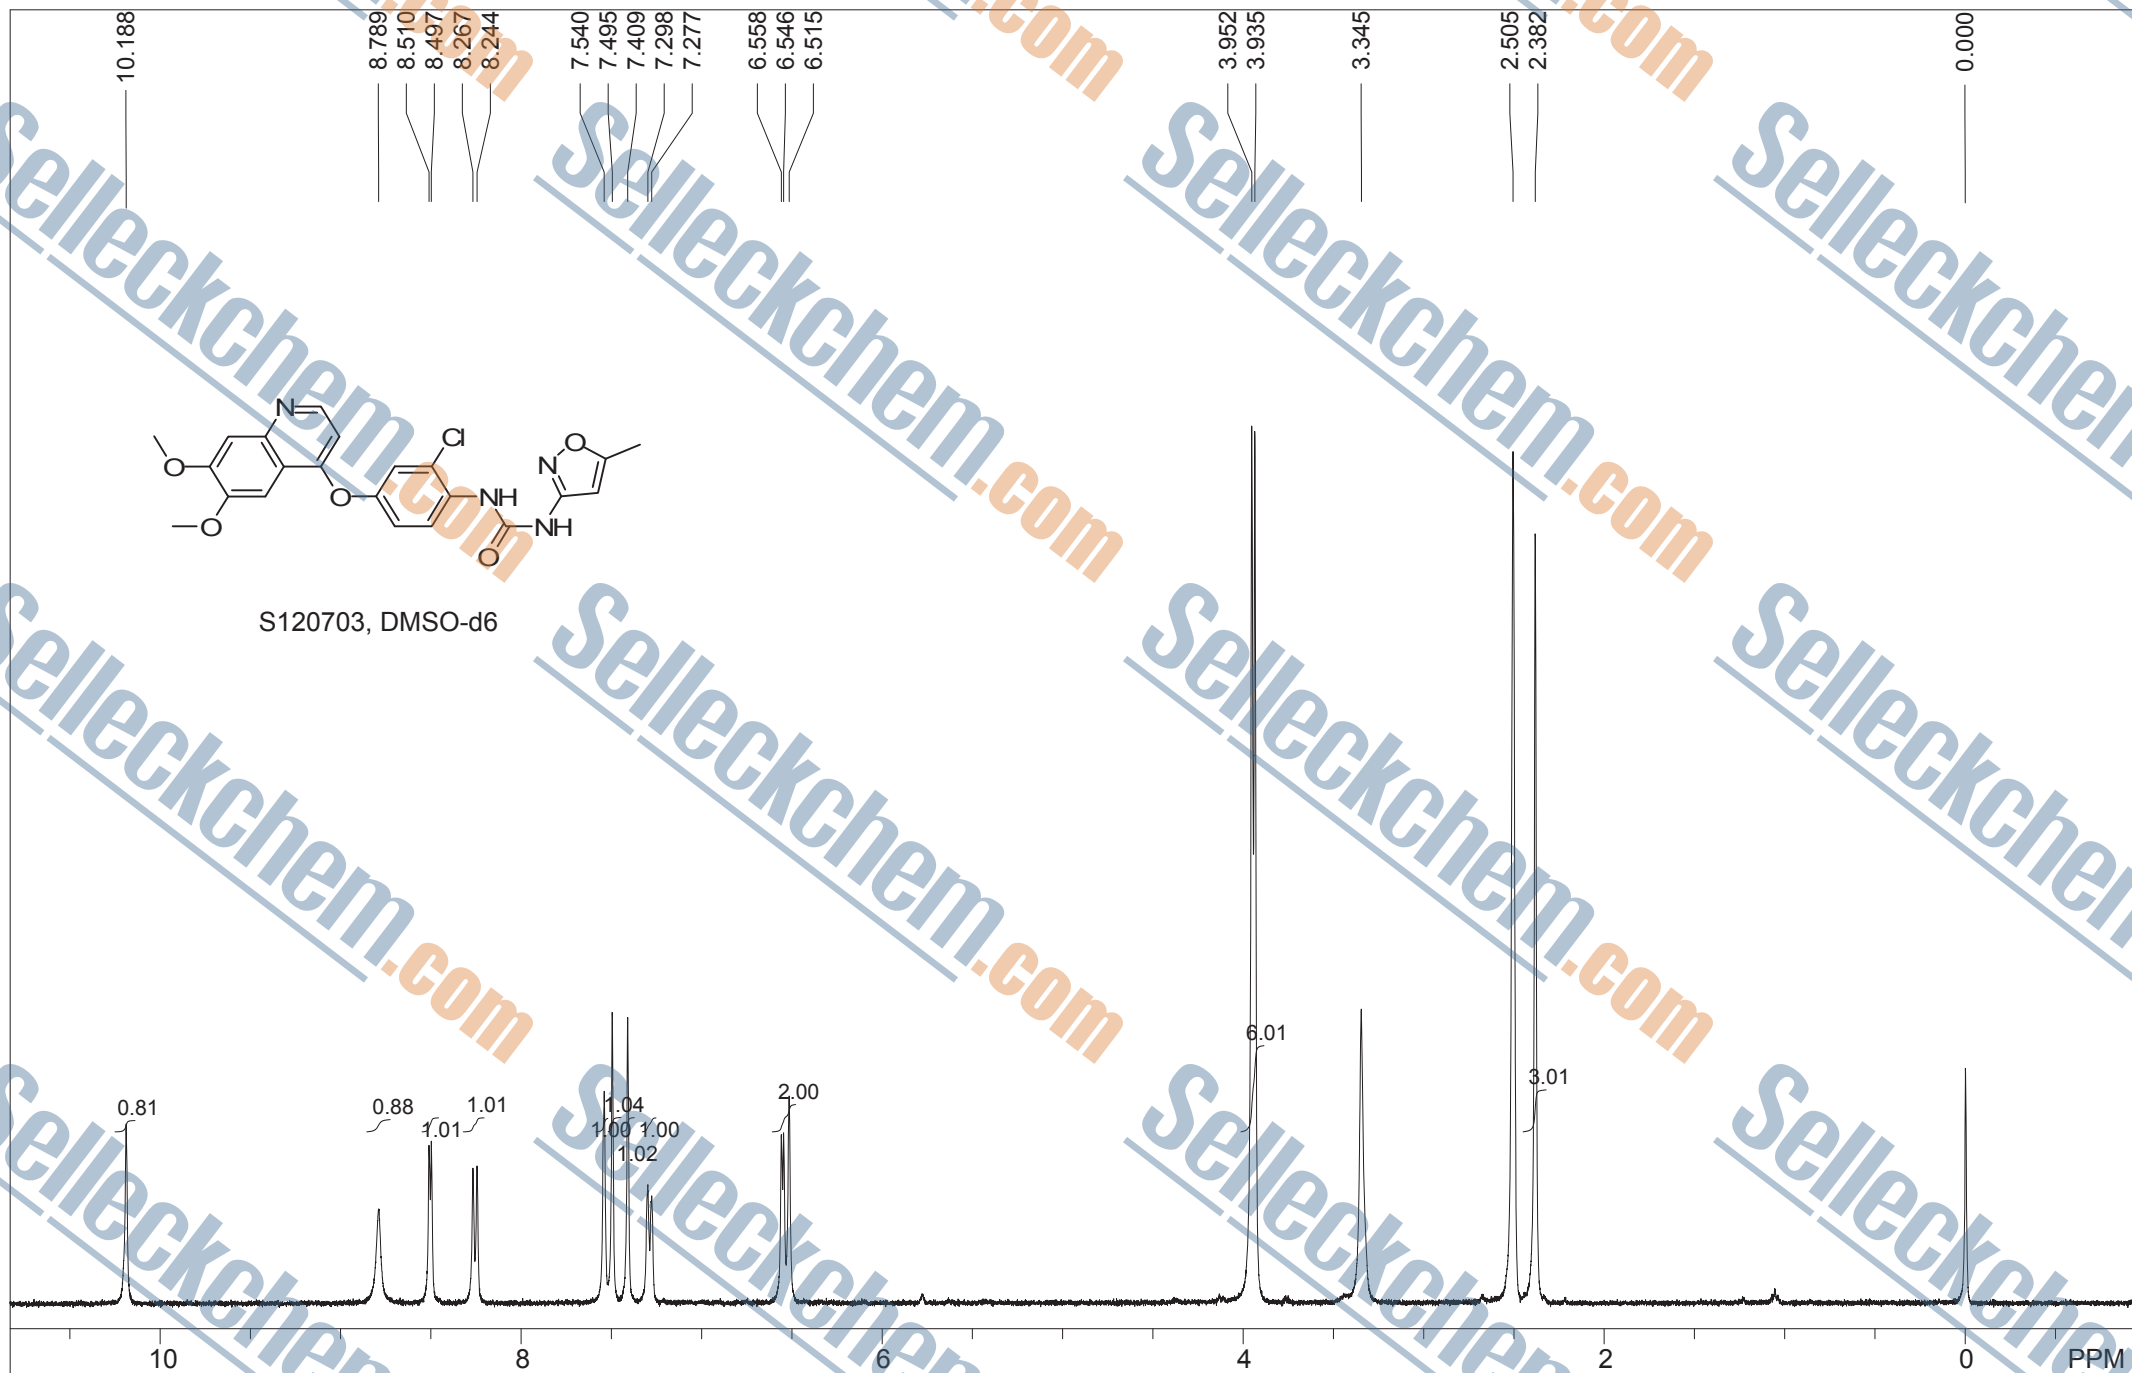

S120703, DMSO-d6

|                       |             |             |             |              |                                    |  |
|-----------------------|-------------|-------------|-------------|--------------|------------------------------------|--|
| Std proton;blank line |             |             |             |              |                                    |  |
| F1: 399.647           | F2: 100.500 | SW1: 8013   | OF1: 2013.2 | PTS1d: 16416 | 32768                              |  |
| EX: s2pul             | PW: 7.2 us  | PD: 2.0 sec | NA: 8       | LB: 0.0      | Nuts - SS120703 Tivozanib (AV-951) |  |



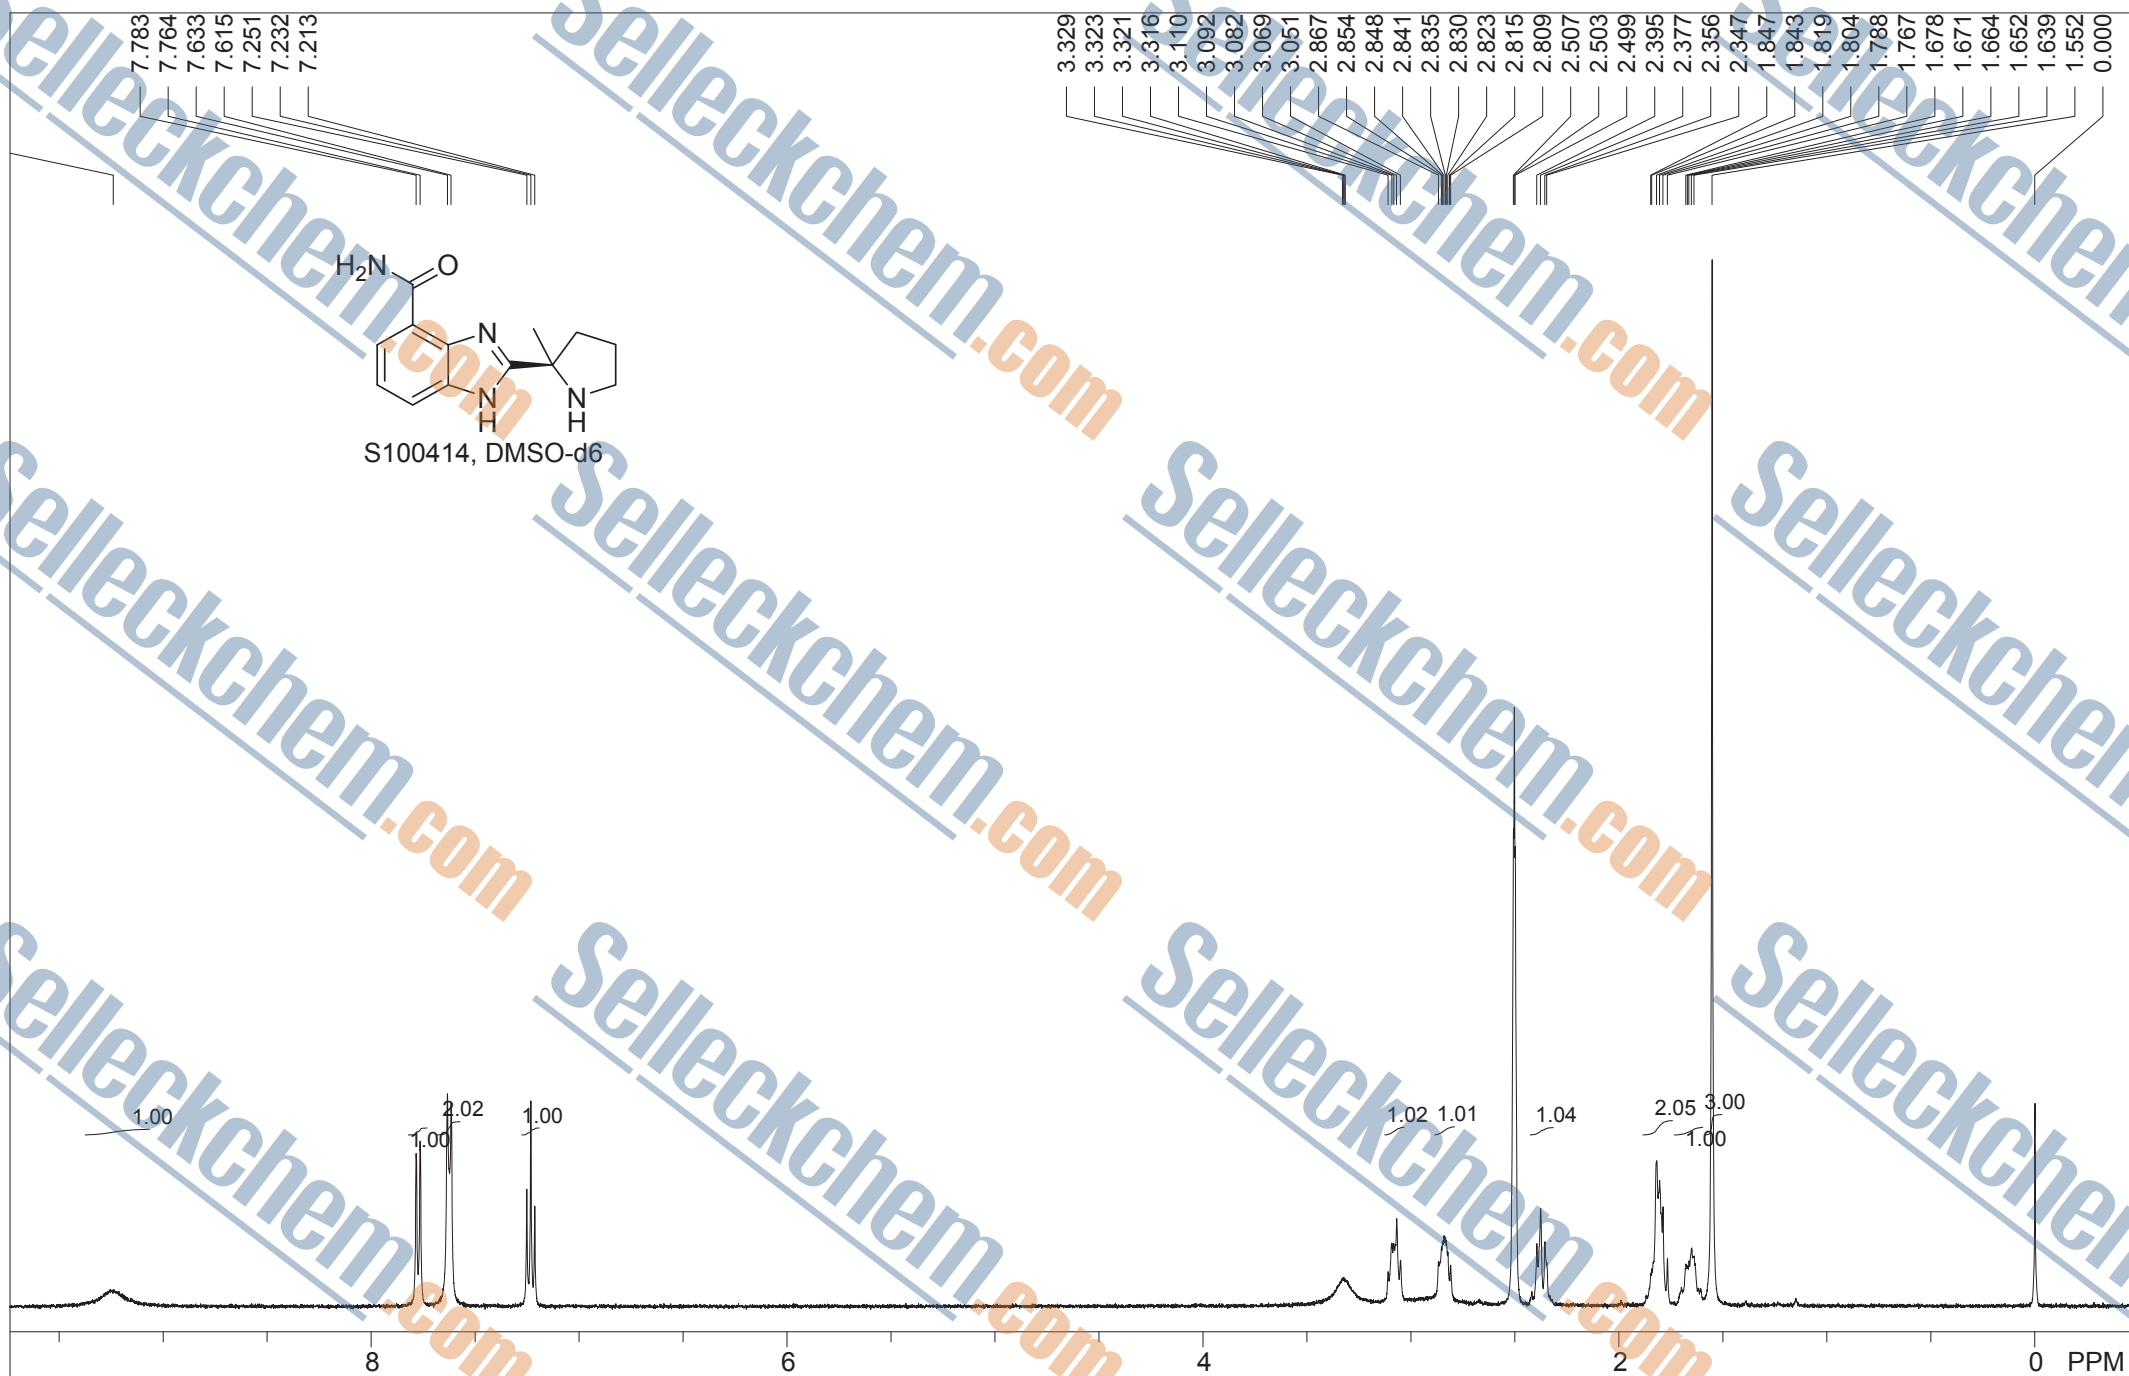

STANDARD PROTON PARAMETERSga:blank line:blank line:blank line

|             |             |             |             |                        |
|-------------|-------------|-------------|-------------|------------------------|
| F1: 399.664 | F2: 100.504 | SW1: 10000  | OF1: 3007.1 | PTS1d: 32768 , 32768   |
| EX: s2pul   | PW: 6.5 us  | PD: 1.0 sec | NA: 8       | LB: 0.0                |
|             |             |             |             | Nuts - S100414 ABT-888 |

Acq. Operator : SYSTEM  
 Acq. Instrument : 12601c

Seq. Line : 3  
 Location : Vial 34

Inj Volume : 2.000 µl

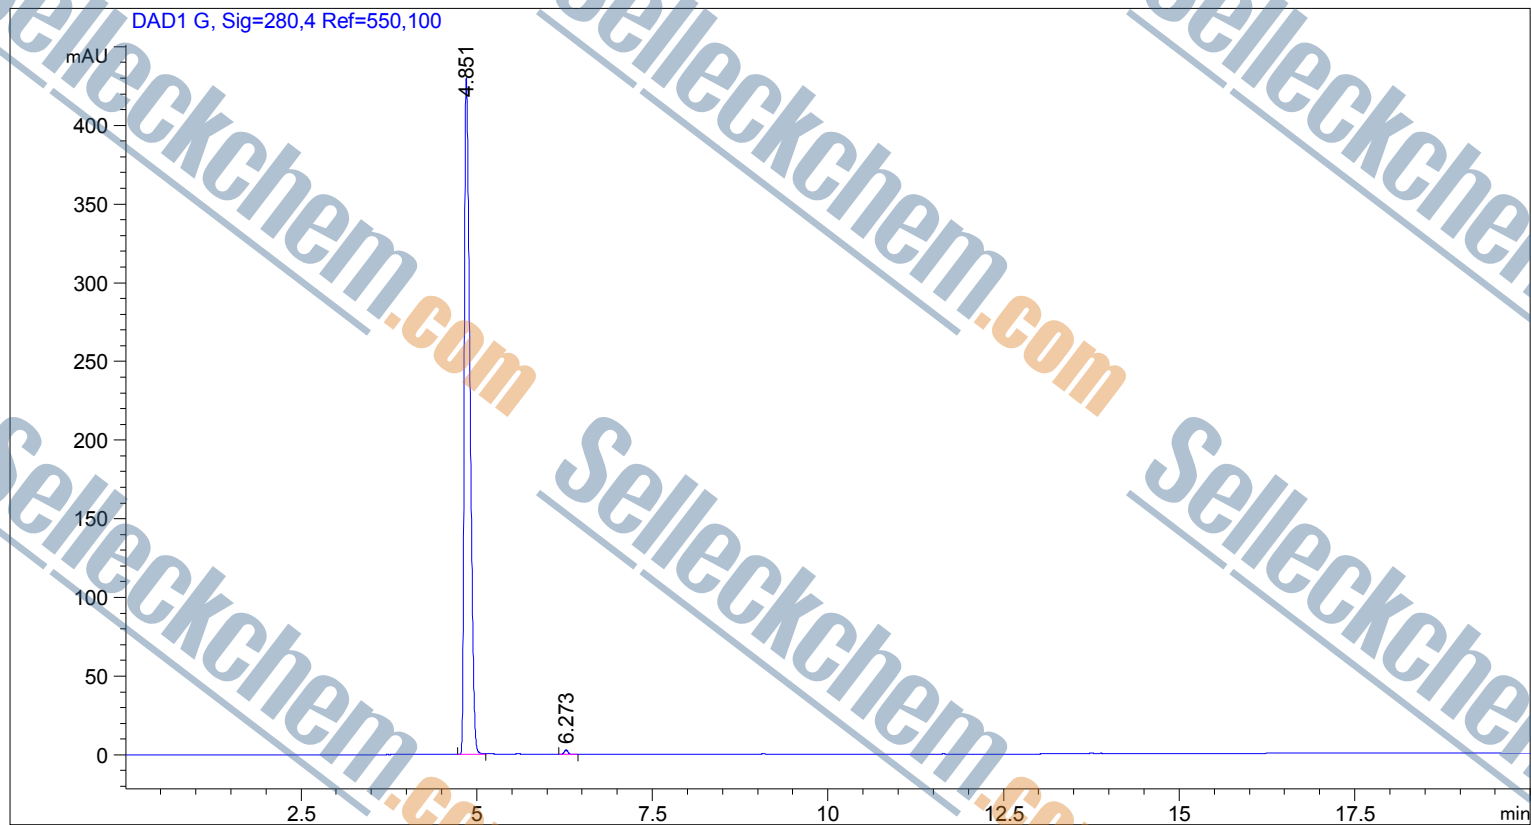

Area Percent Report

Sorted By : Signal  
 Multiplier : 1.0000  
 Dilution : 1.0000  
 Use Multiplier & Dilution Factor with ISTDs

Signal 1: DAD1 G, Sig=280,4 Ref=550,100

| Peak #   | RetTime [min] | Type | Width [min] | Area [mAU*s] | Height [mAU] | Area %  |
|----------|---------------|------|-------------|--------------|--------------|---------|
| 1        | 4.851         | BV   | 0.0895      | 2429.45117   | 429.71918    | 99.5601 |
| 2        | 6.273         | BB   | 0.0577      | 10.73442     | 2.86682      | 0.4399  |
| Totals : |               |      |             | 2440.18559   | 432.58599    |         |

\*\*\* End of Report \*\*\*

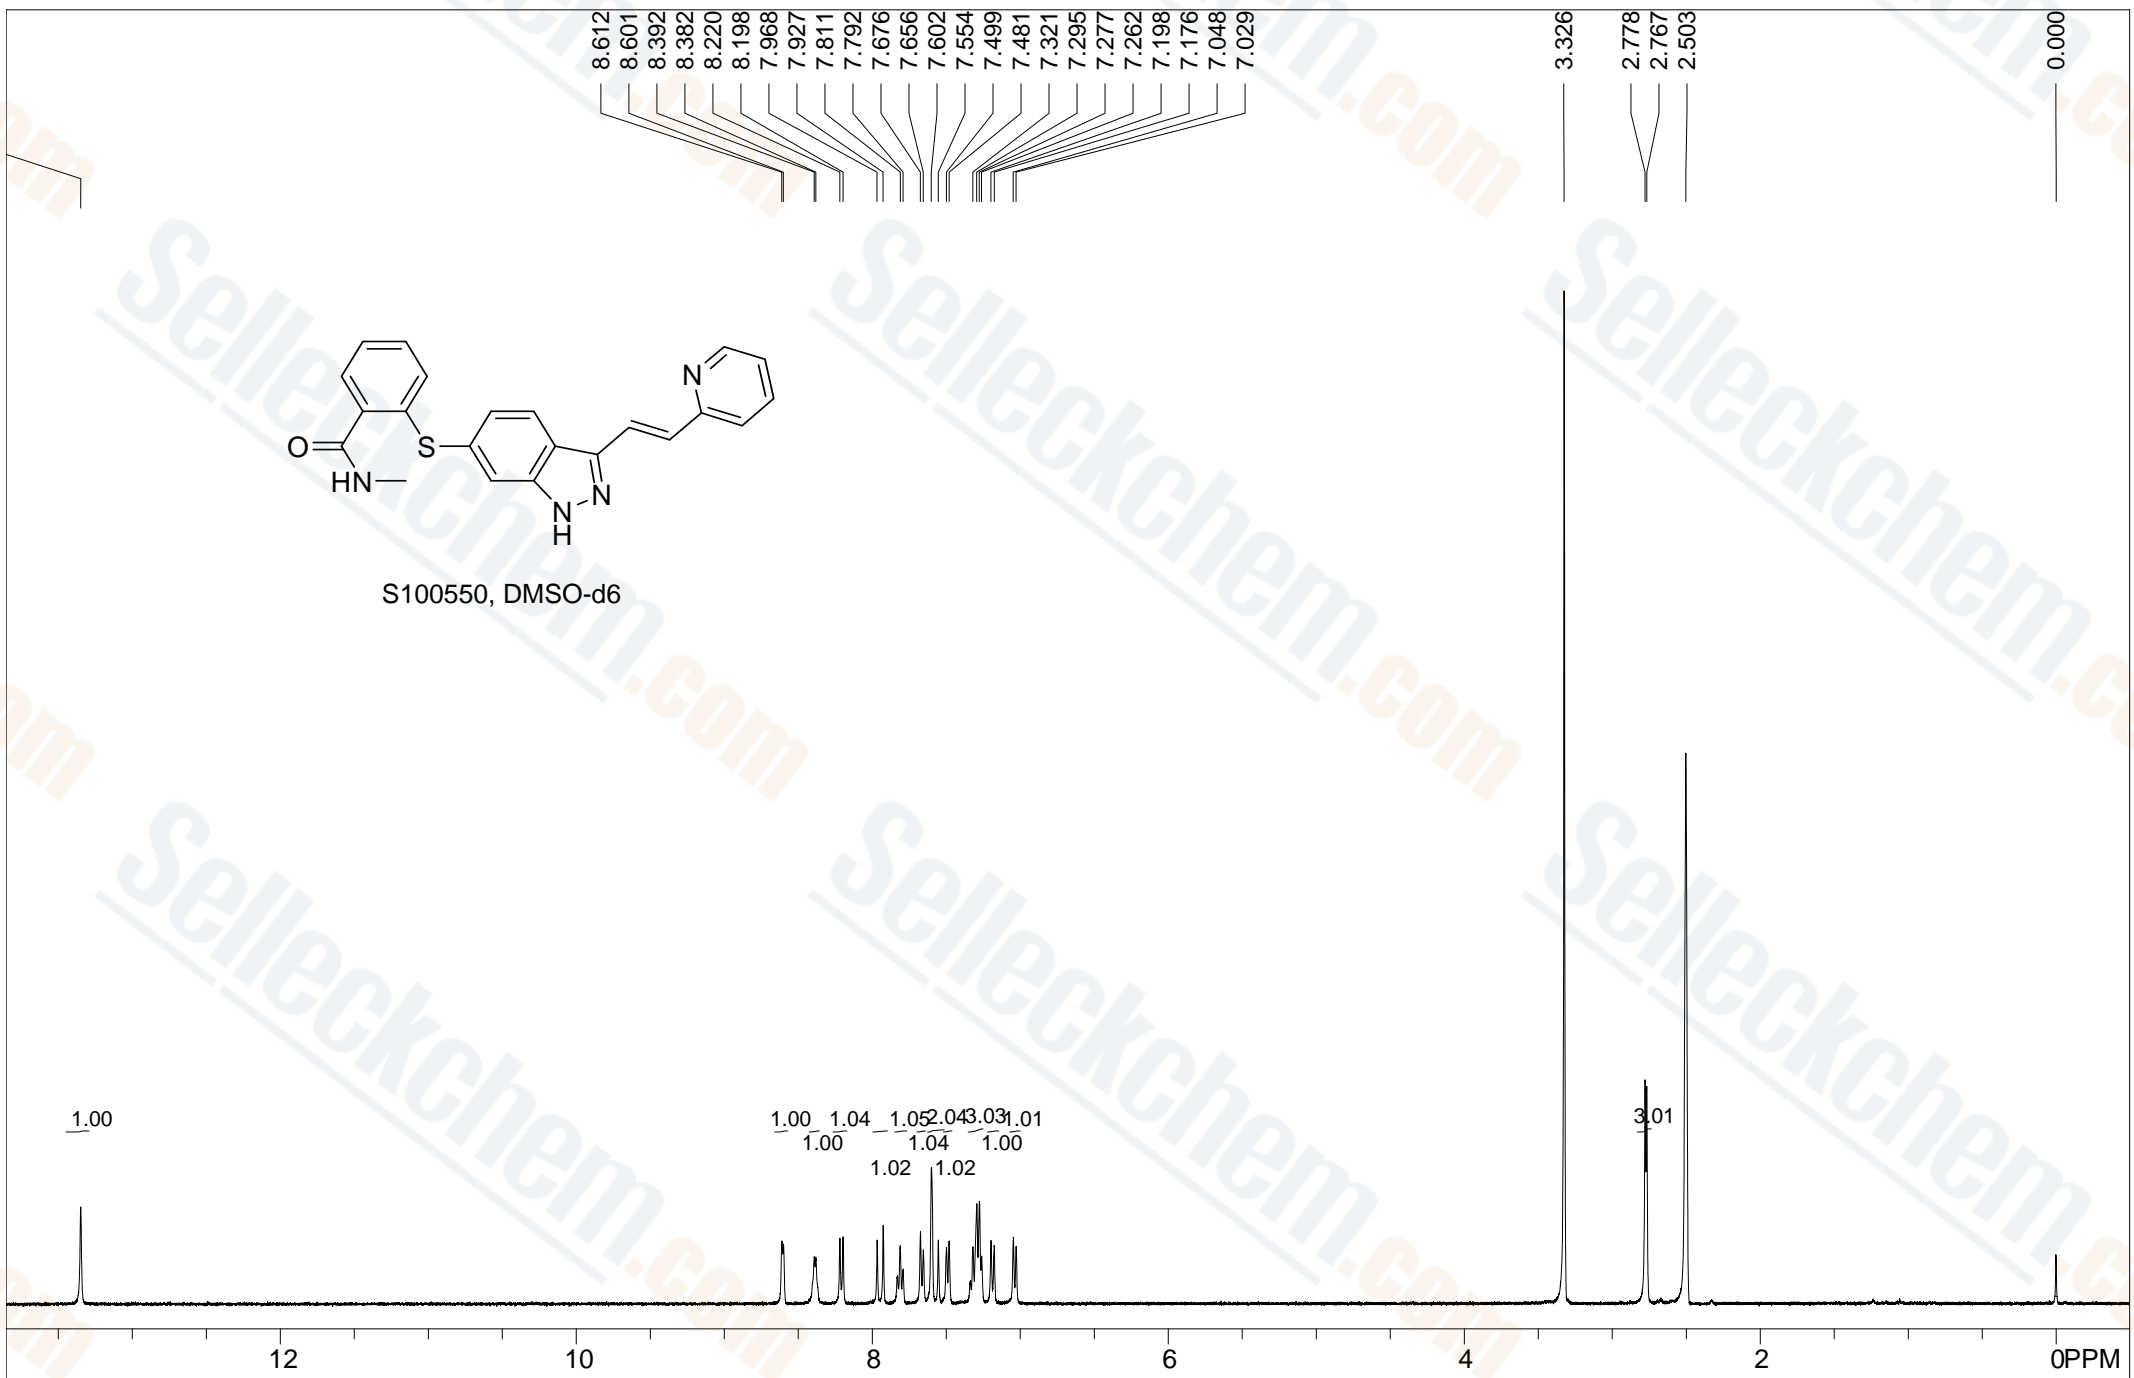

Std proton:blank line

|             |             |             |             |                      |
|-------------|-------------|-------------|-------------|----------------------|
| F1: 399.647 | F2: 100.500 | SW1: 8013   | OF1: 2011.7 | PTS1d: 16416 , 32768 |
| EX: s2pul   | PW: 7.2 us  | PD: 2.0 sec | NA: 8       | LB: 0.0              |

Nuts - \$S100550 Axitinib

# SAMPLE INFORMATION

Sample Name: F3485 S100550 Axitinib  
Sample Type:  
Viat: 1  
Injection #: 11  
Injection Volume: 20.00 ul  
Run Time: 30.0 Minutes  
Sample Set Name:

Acquirde By: System  
Acq. Method Set: Z  
Processing Method: 259  
Channel Name:  
Proc. Chnl. Descr: 259

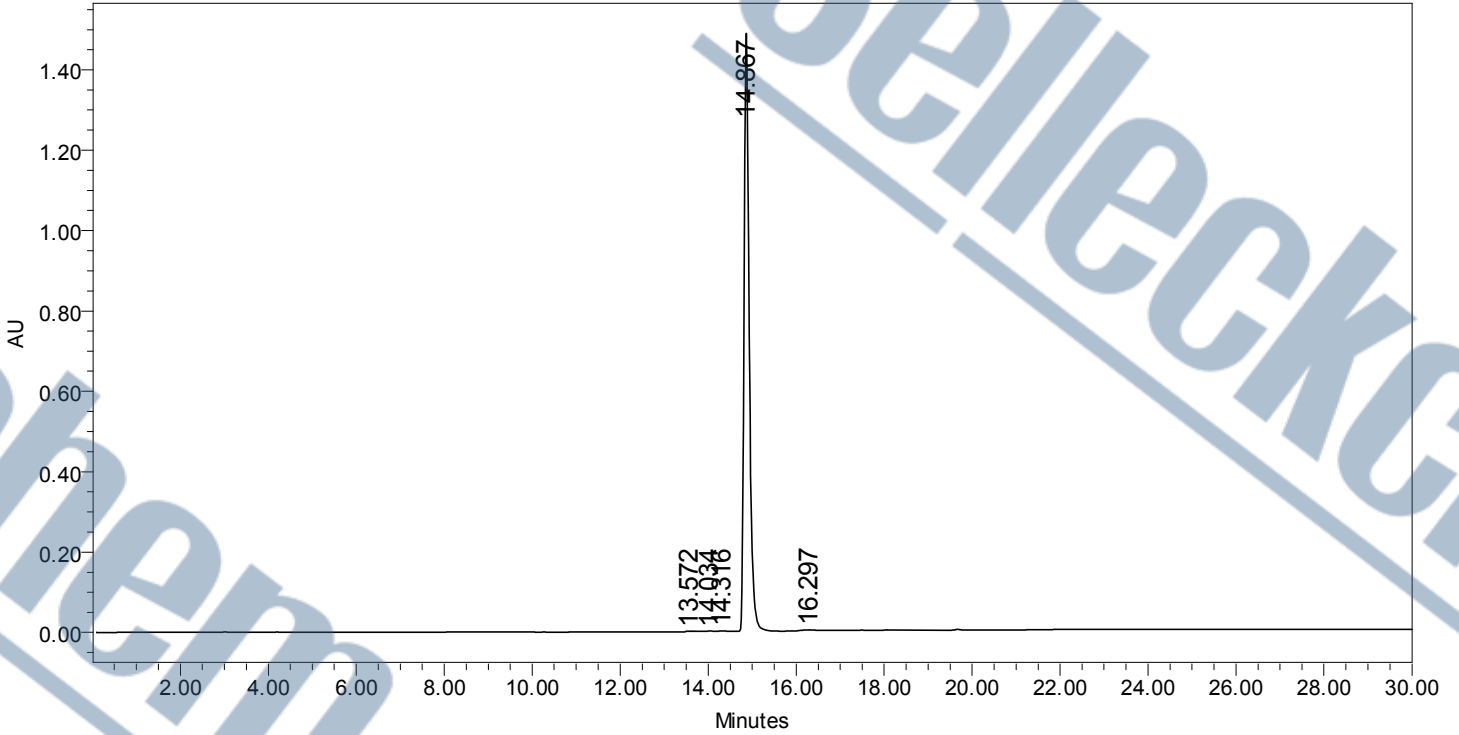

|   | RT     | Area     | Height  | % Area |
|---|--------|----------|---------|--------|
| 1 | 13.572 | 7864     | 893     | 0.06   |
| 2 | 14.034 | 5285     | 887     | 0.04   |
| 3 | 14.316 | 7740     | 947     | 0.06   |
| 4 | 14.867 | 12150743 | 1483139 | 99.64  |
| 5 | 16.297 | 23162    | 1528    | 0.19   |

```
=====
Acq. Operator   : SYSTEM                      Seq. Line :    5
Acq. Instrument : 12601c                     Location  : Vial 43
```

Inj Volume : 2.000 µl

Different Inj Volume from Sample Entry! Actual Inj Volume : 1.200 µl

Additional Info : Peak(s) manually integrated

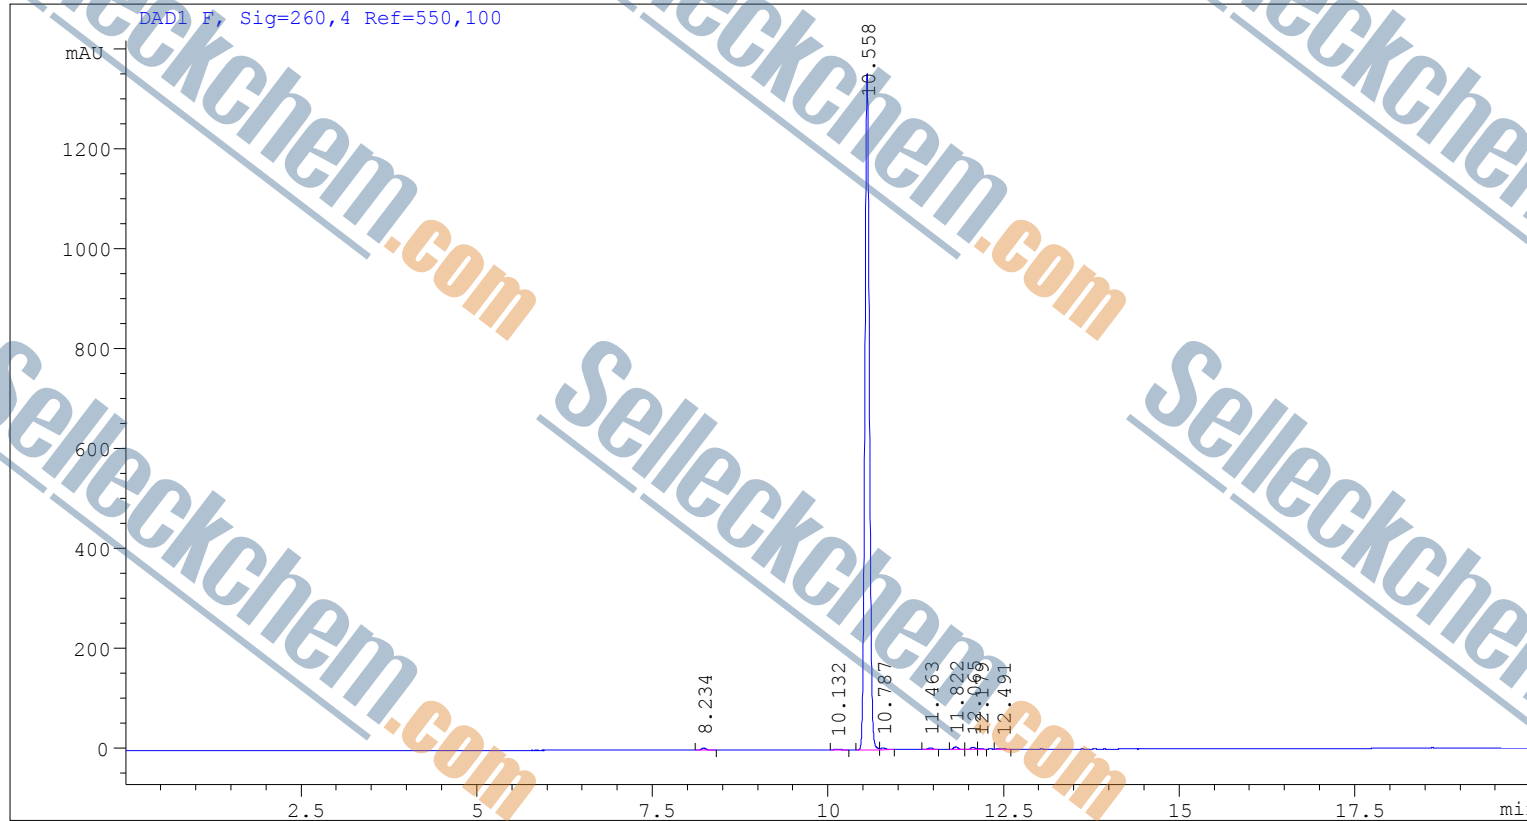

=====  
Area Percent Report  
=====

```
Sorted By      :      Signal
Multiplier     :      1.0000
Dilution      :      1.0000
Use Multiplier & Dilution Factor with ISTDs
```

Signal 1: DAD1 F, Sig=260,4 Ref=550,100

| Peak # | RetTime [min] | Type | Width [min] | Area [mAU*s] | Height [mAU] | Area %  |
|--------|---------------|------|-------------|--------------|--------------|---------|
| 1      | 8.234         | BB   | 0.0704      | 18.75048     | 4.13678      | 0.1524  |
| 2      | 10.132        | BB   | 0.0850      | 8.41432      | 1.47620      | 0.0857  |
| 3      | 10.558        | BV   | 0.0694      | 6078.54932   | 1352.71924   | 99.0372 |
| 4      | 10.787        | VB   | 0.0815      | 16.50795     | 3.05490      | 0.1162  |
| 5      | 11.463        | BB   | 0.0713      | 15.39543     | 3.24729      | 0.0983  |
| 6      | 11.822        | BB   | 0.0661      | 22.80285     | 5.36842      | 0.2178  |
| 7      | 12.065        | BV   | 0.0676      | 19.91418     | 4.50254      | 0.1712  |
| 8      | 12.179        | VV   | 0.0873      | 6.84844      | 1.19679      | 0.0405  |

Sample Name: F6353 S100830 AZD6244

| Peak # | RetTime [min] | Type | Width [min] | Area [mAU*s] | Height [mAU] | Area % |
|--------|---------------|------|-------------|--------------|--------------|--------|
| 9      | 12.491        | VB   | 0.1048      | 13.06524     | 1.67953      | 0.0807 |

Totals : 6200.24820 1377.38169

\*\*\* End of Report \*\*\*

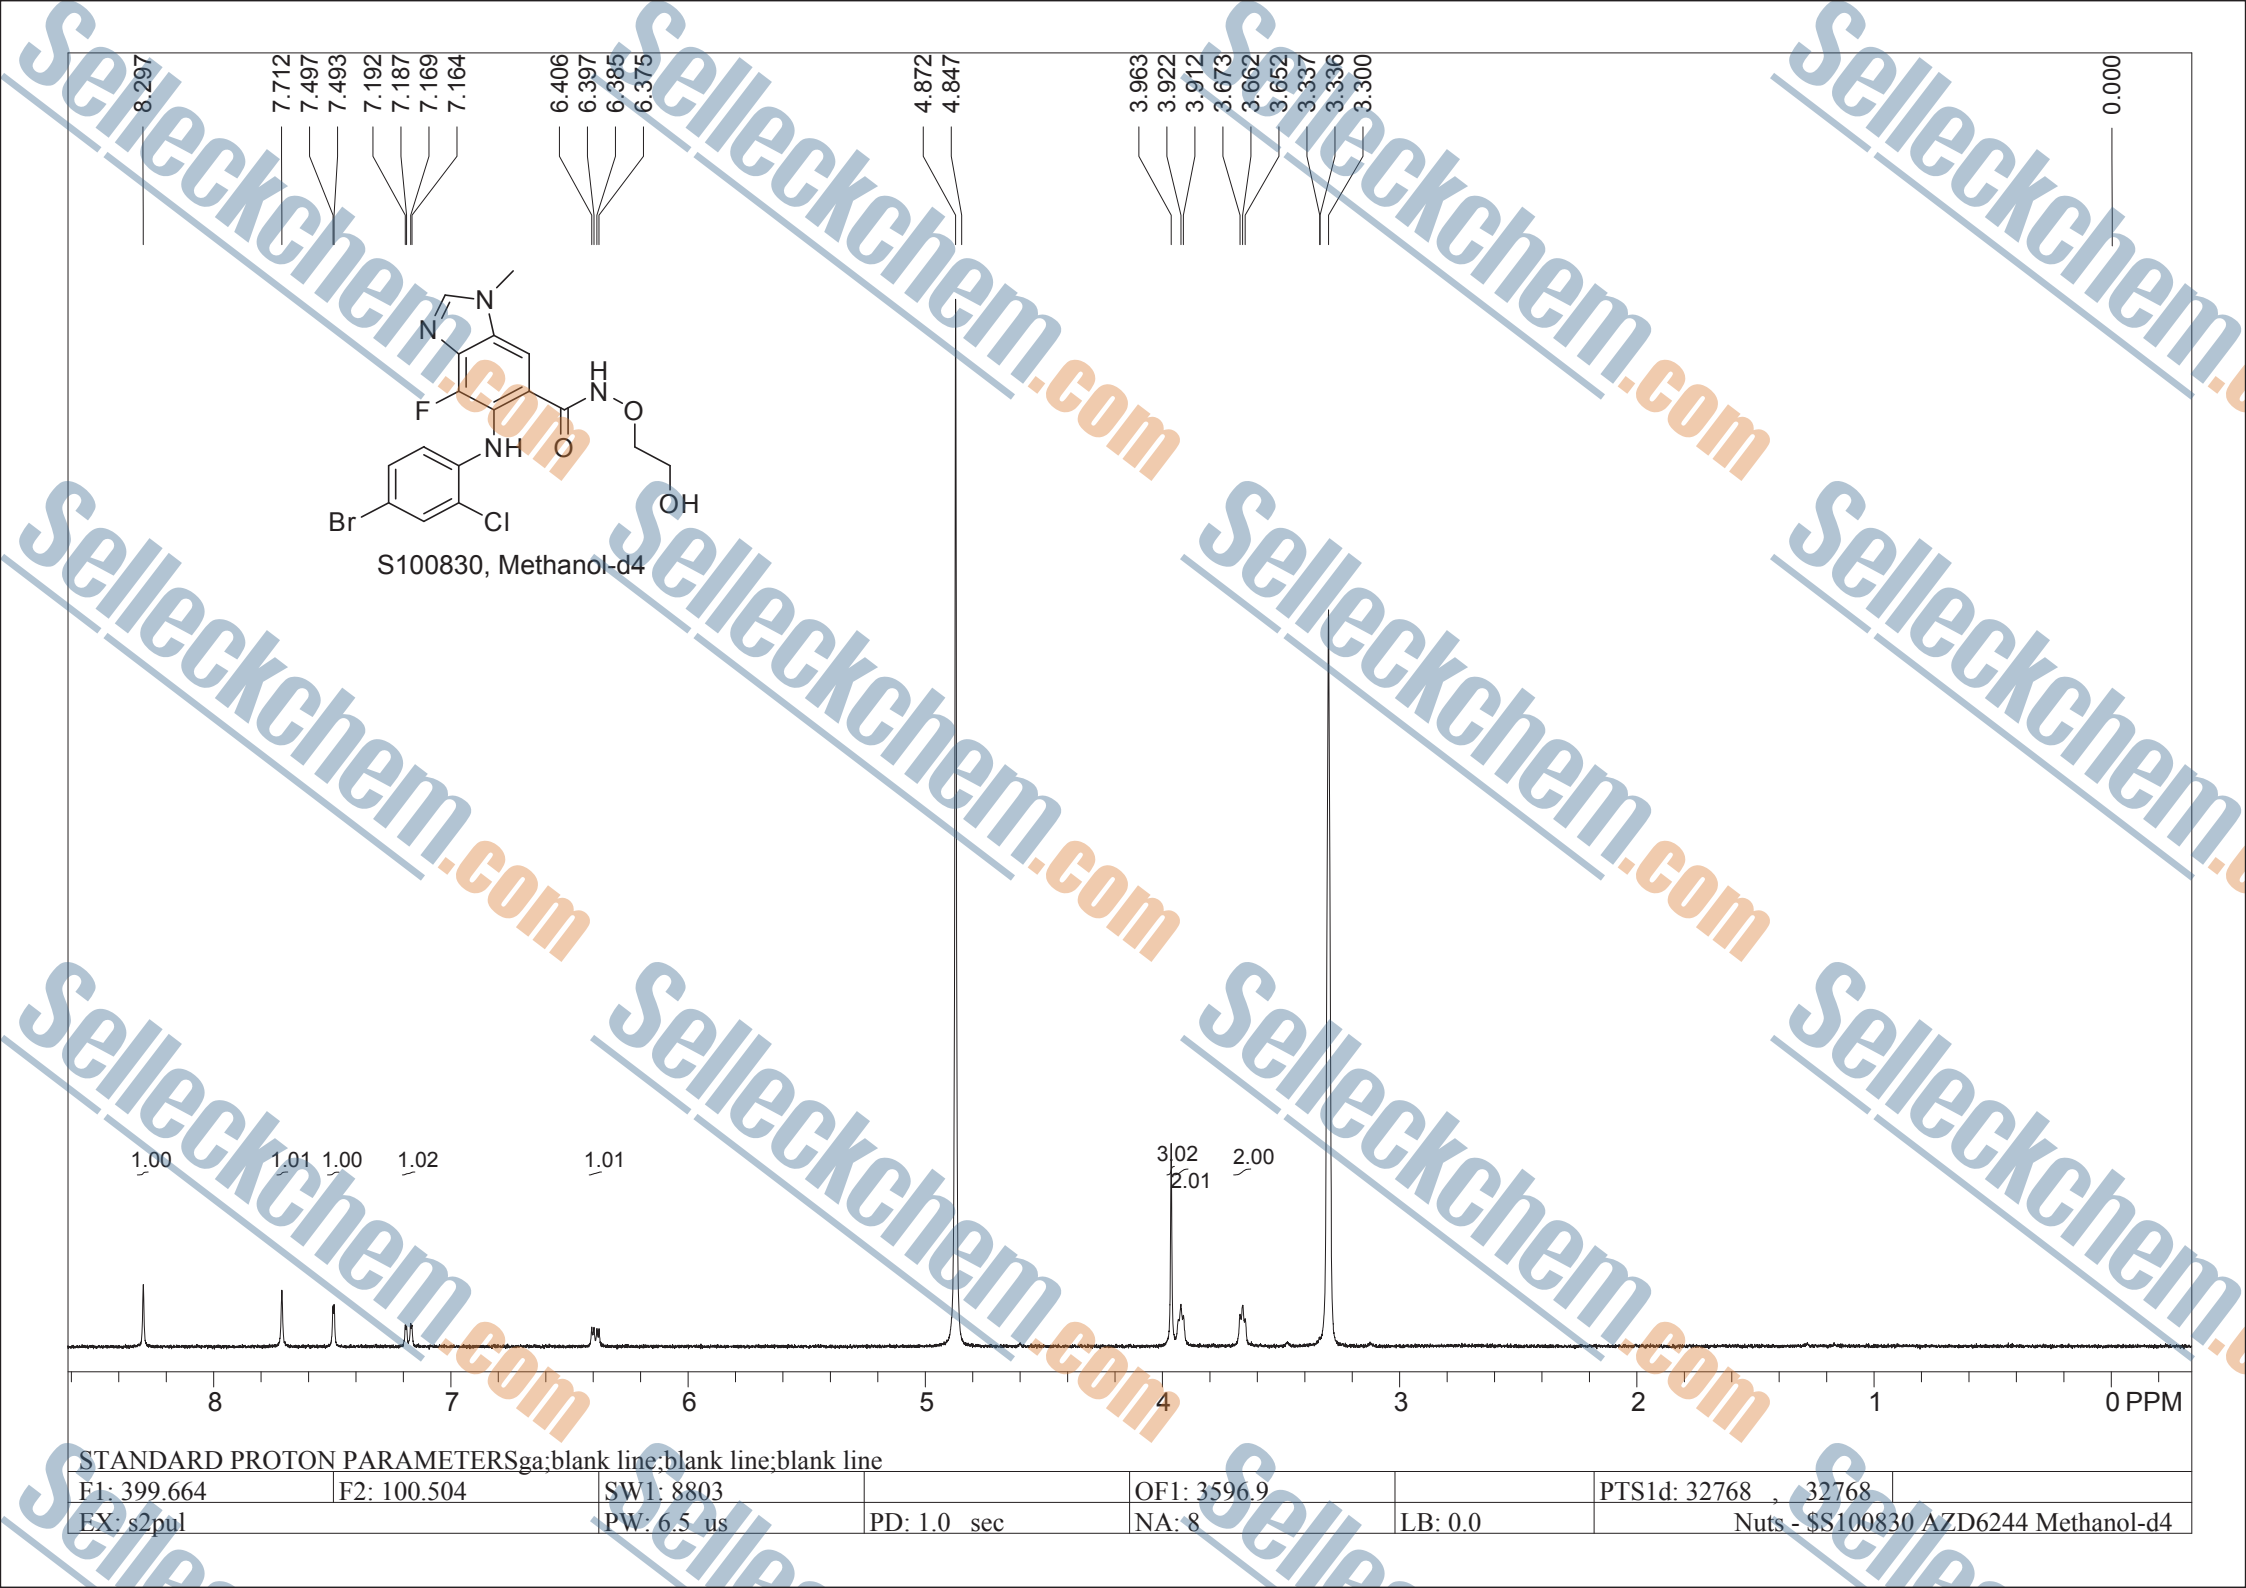

STANDARD PROTON PARAMETERSga;blank line;blank line;blank line

|             |             |             |             |                                      |
|-------------|-------------|-------------|-------------|--------------------------------------|
| F1: 399.664 | F2: 100.504 | SW1: 8803   | OF1: 3596.9 | PTS1d: 32768 , 32768                 |
| EX: s2pul   | PW: 6.5 us  | PD: 1.0 sec | NA: 8       | LB: 0.0                              |
|             |             |             |             | Nuts - \$S100830 AZD6244 Methanol-d4 |

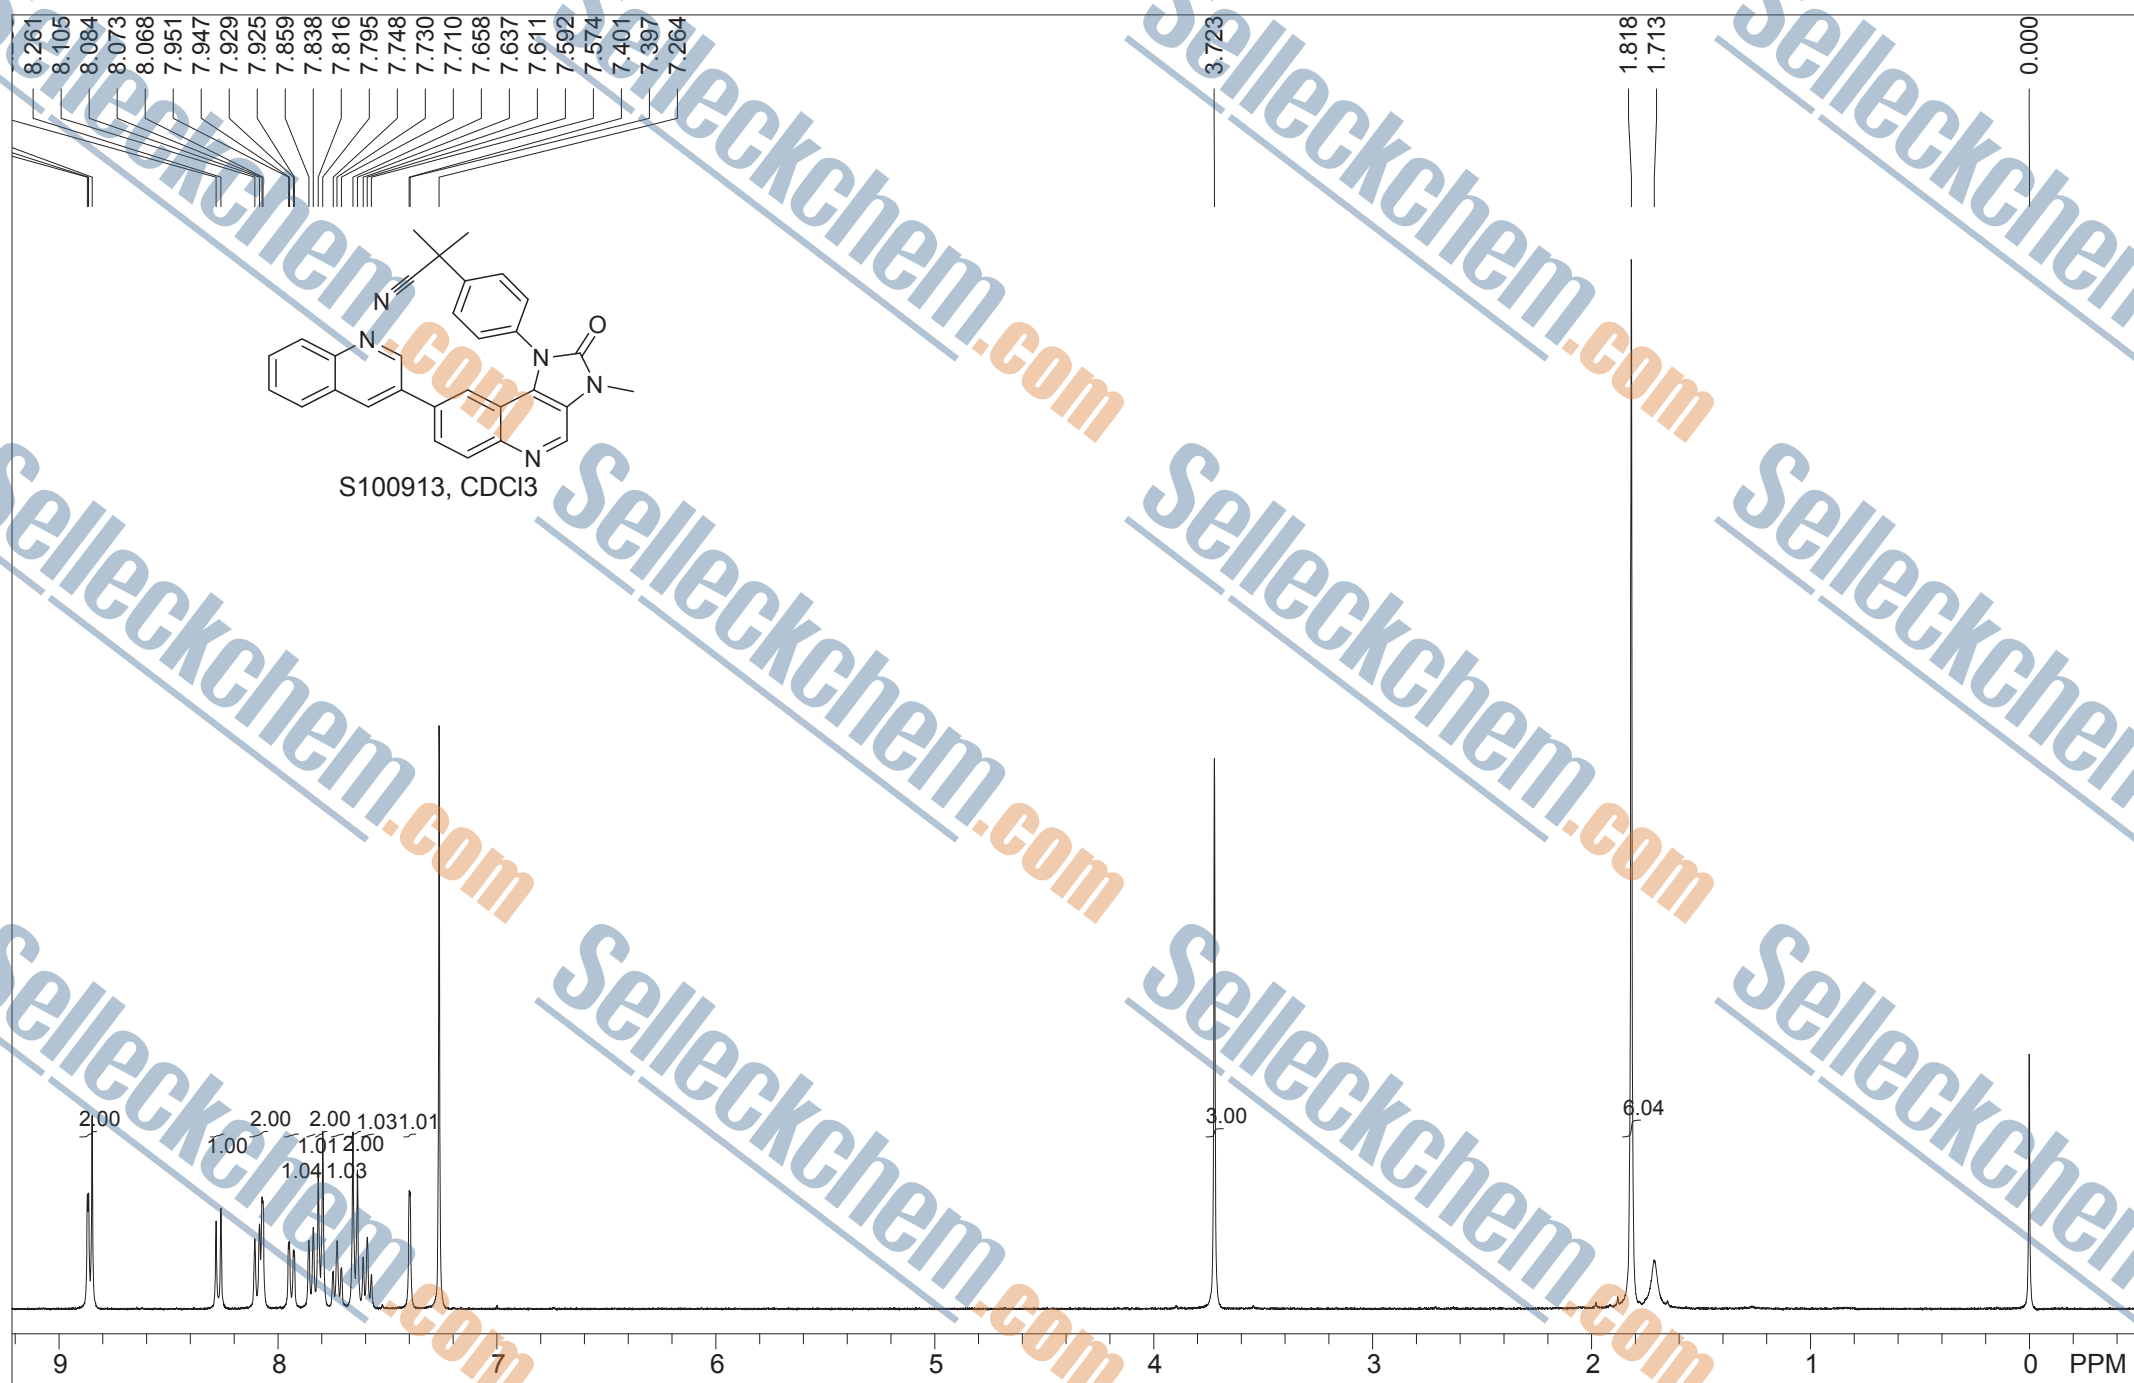

STANDARD PROTON PARAMETERSga:blank line:blank line:blank line

|             |             |             |                                                        |                      |
|-------------|-------------|-------------|--------------------------------------------------------|----------------------|
| F1: 399.663 | F2: 100.504 | SW1: 8803   | OF1: 3600.3                                            | PTS1d: 32768 , 32768 |
| EX: s2pul   | PW: 6.5 us  | PD: 1.0 sec | NA: 8                                                  | LB: 0.0              |
|             |             |             | Nuts - \$S100913 BEZ235 (NVP-BEZ235) CDCl <sub>3</sub> |                      |



=====  
Acq. Operator : SYSTEM                               Seq. Line : 3  
Acq. Instrument : 12601c                             Location : Vial 39  
  
                                                      Inj Volume : 2.000 µl  
Different Inj Volume from Sample Entry!   Actual Inj Volume : 1.000 µl

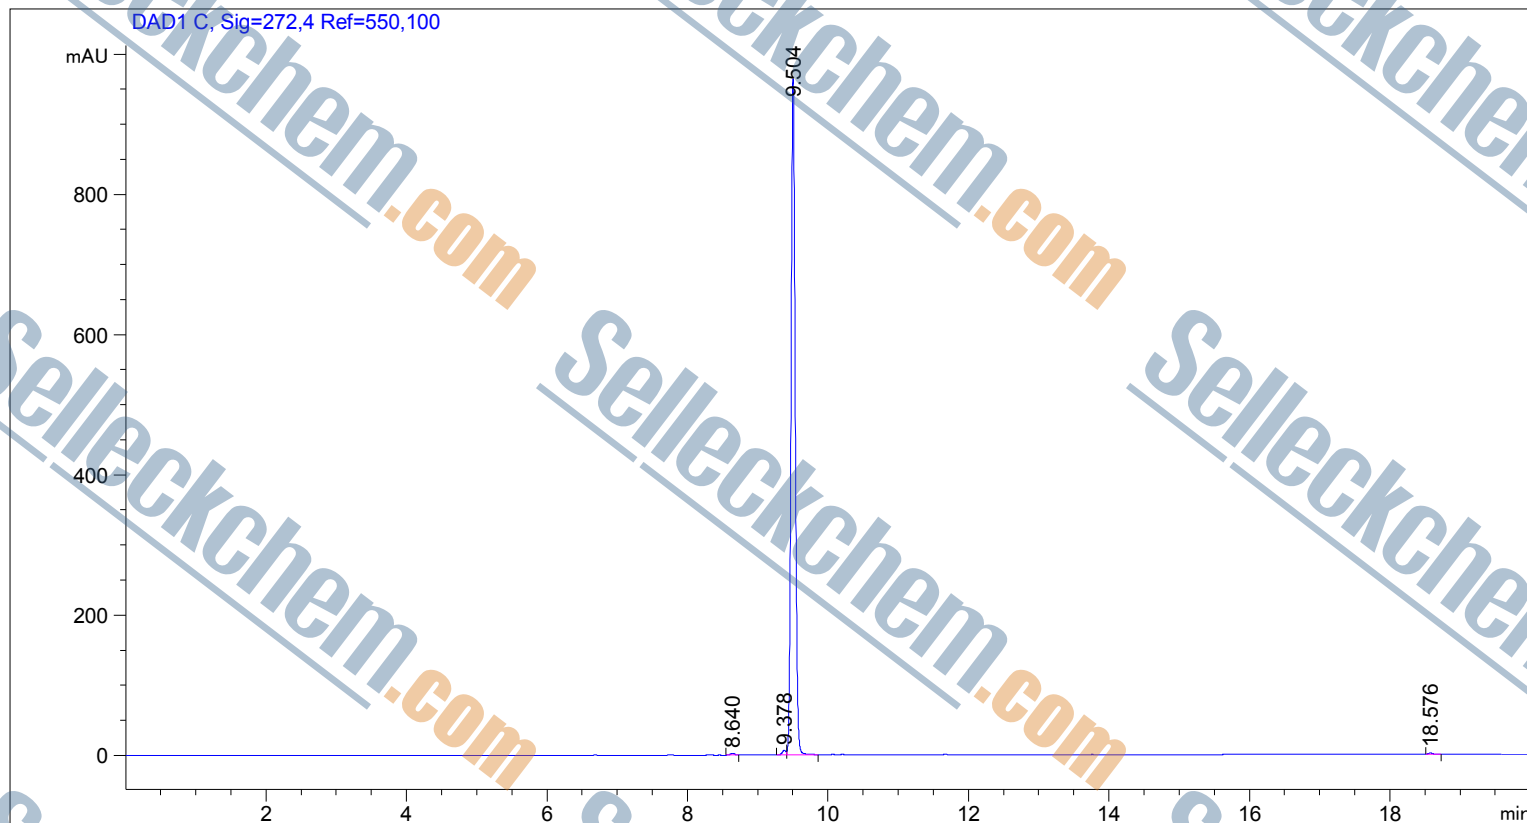

=====  
Area Percent Report  
=====

Sorted By : Signal  
Multiplier : 1.0000  
Dilution : 1.0000  
Use Multiplier & Dilution Factor with ISTDs

Signal 1: DAD1 C, Sig=272,4 Ref=550,100

| Peak # | RetTime [min] | Type | Width [min] | Area [mAU*s] | Height [mAU] | Area %  |
|--------|---------------|------|-------------|--------------|--------------|---------|
| 1      | 8.640         | BB   | 0.0627      | 10.41231     | 2.63072      | 0.2597  |
| 2      | 9.378         | BV   | 0.0544      | 19.65058     | 5.95295      | 0.5148  |
| 3      | 9.504         | VB   | 0.0640      | 3968.99097   | 964.12909    | 99.0937 |
| 4      | 18.576        | BB   | 0.0495      | 5.28138      | 1.62006      | 0.1317  |

Totals :                                   4009.33524   975.33282

=====  
\*\*\* End of Report \*\*\*

```
=====
Acq. Operator   : SYSTEM                      Seq. Line :    2
Acq. Instrument : 12601c                     Location  : Vial 85

                                           Inj Volume : 2.000 µl
Different Inj Volume from Sample Entry! Actual Inj Volume : 1.000 µl
=====
```

Additional Info : Peak(s) manually integrated

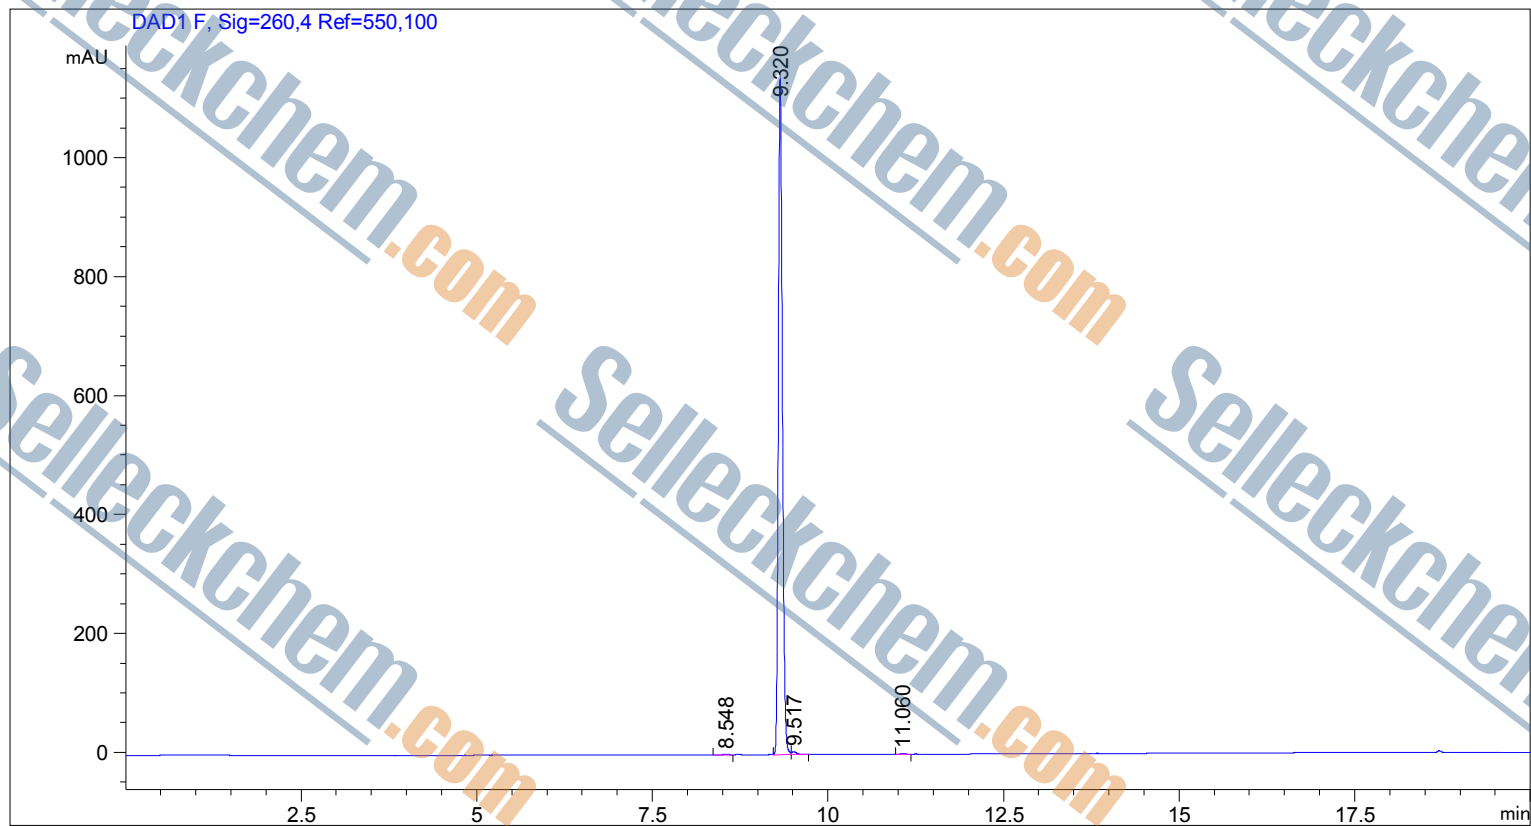

Area Percent Report

```
Sorted By      :      Signal
Multiplier     :      1.0000
Dilution       :      1.0000
Use Multiplier & Dilution Factor with ISTDs
```

Signal 1: DAD1 F, Sig=260,4 Ref=550,100

| Peak # | RetTime [min] | Type | Width [min] | Area [mAU*s] | Height [mAU] | Area %  |
|--------|---------------|------|-------------|--------------|--------------|---------|
| 1      | 8.548         | BB   | 0.0708      | 5.88077      | 1.28716      | 0.1267  |
| 2      | 9.320         | VV   | 0.0623      | 4608.18652   | 1136.41553   | 99.2471 |
| 3      | 9.517         | VB   | 0.0762      | 23.76451     | 4.60216      | 0.5118  |
| 4      | 11.060        | BB   | 0.0727      | 5.31472      | 1.11357      | 0.1145  |

Totals : 4643.14651 1143.41842

=====  
\*\*\* End of Report \*\*\*

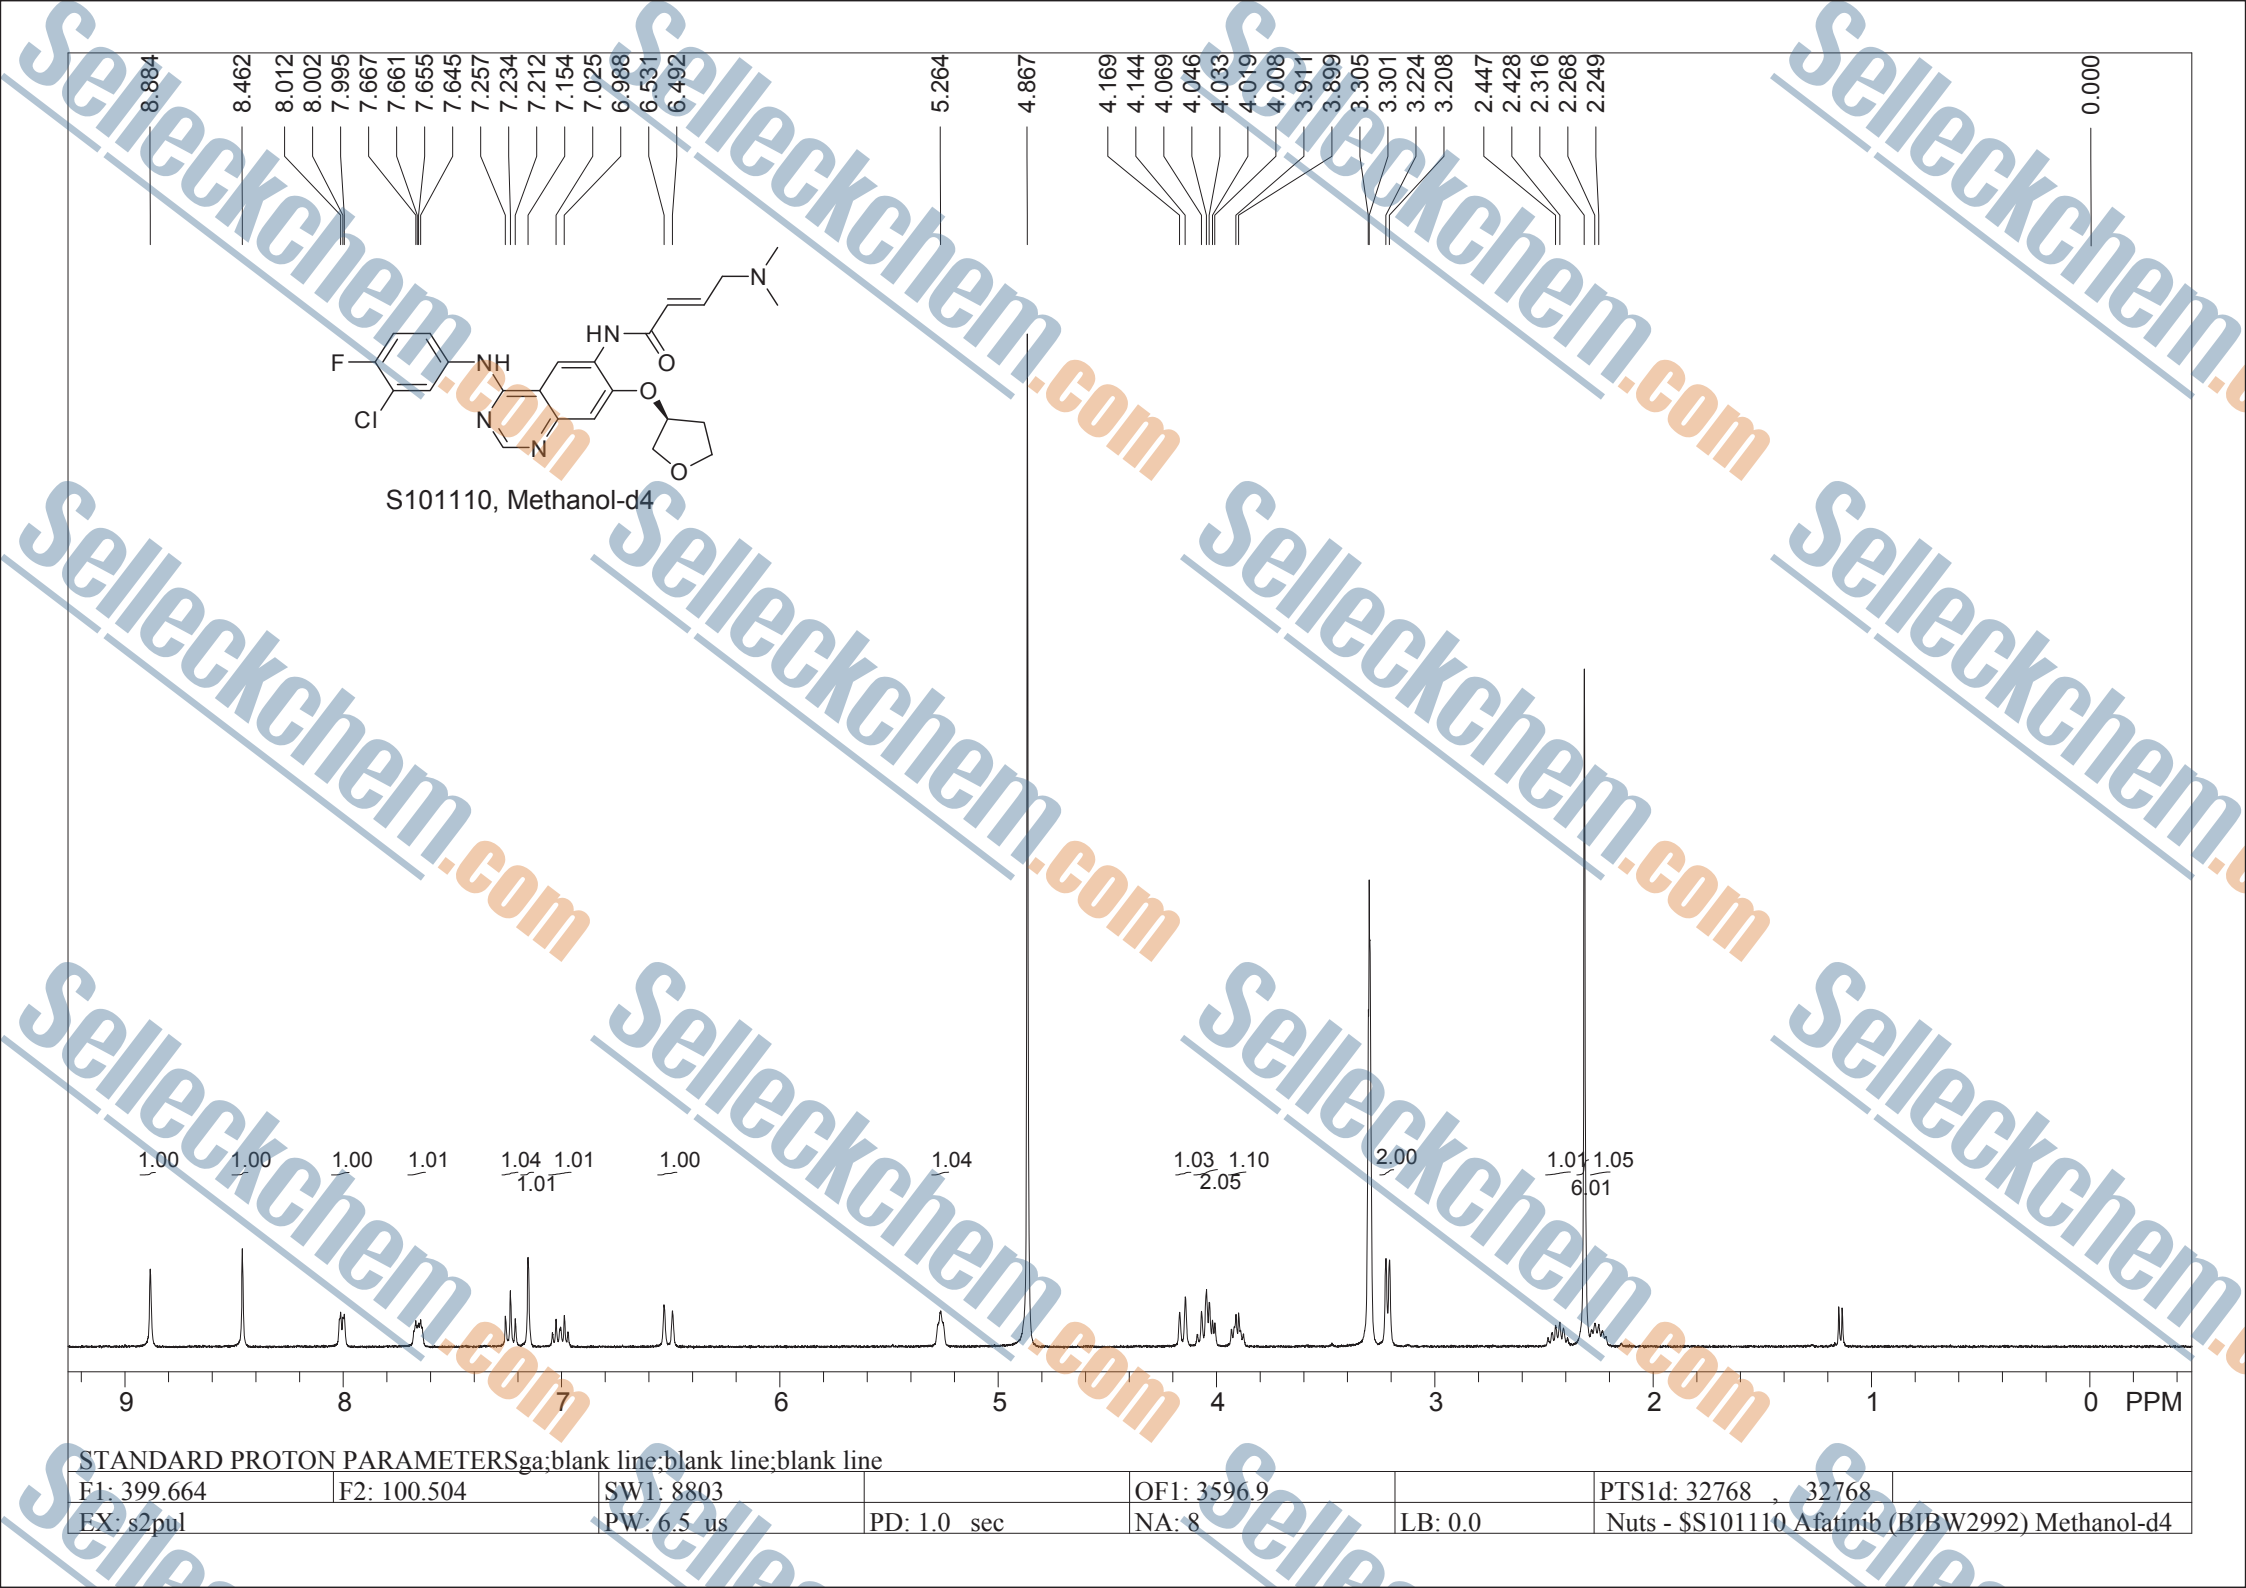

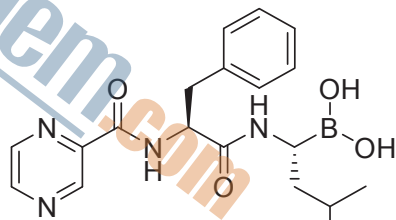

S101314, CDCl<sub>3</sub>

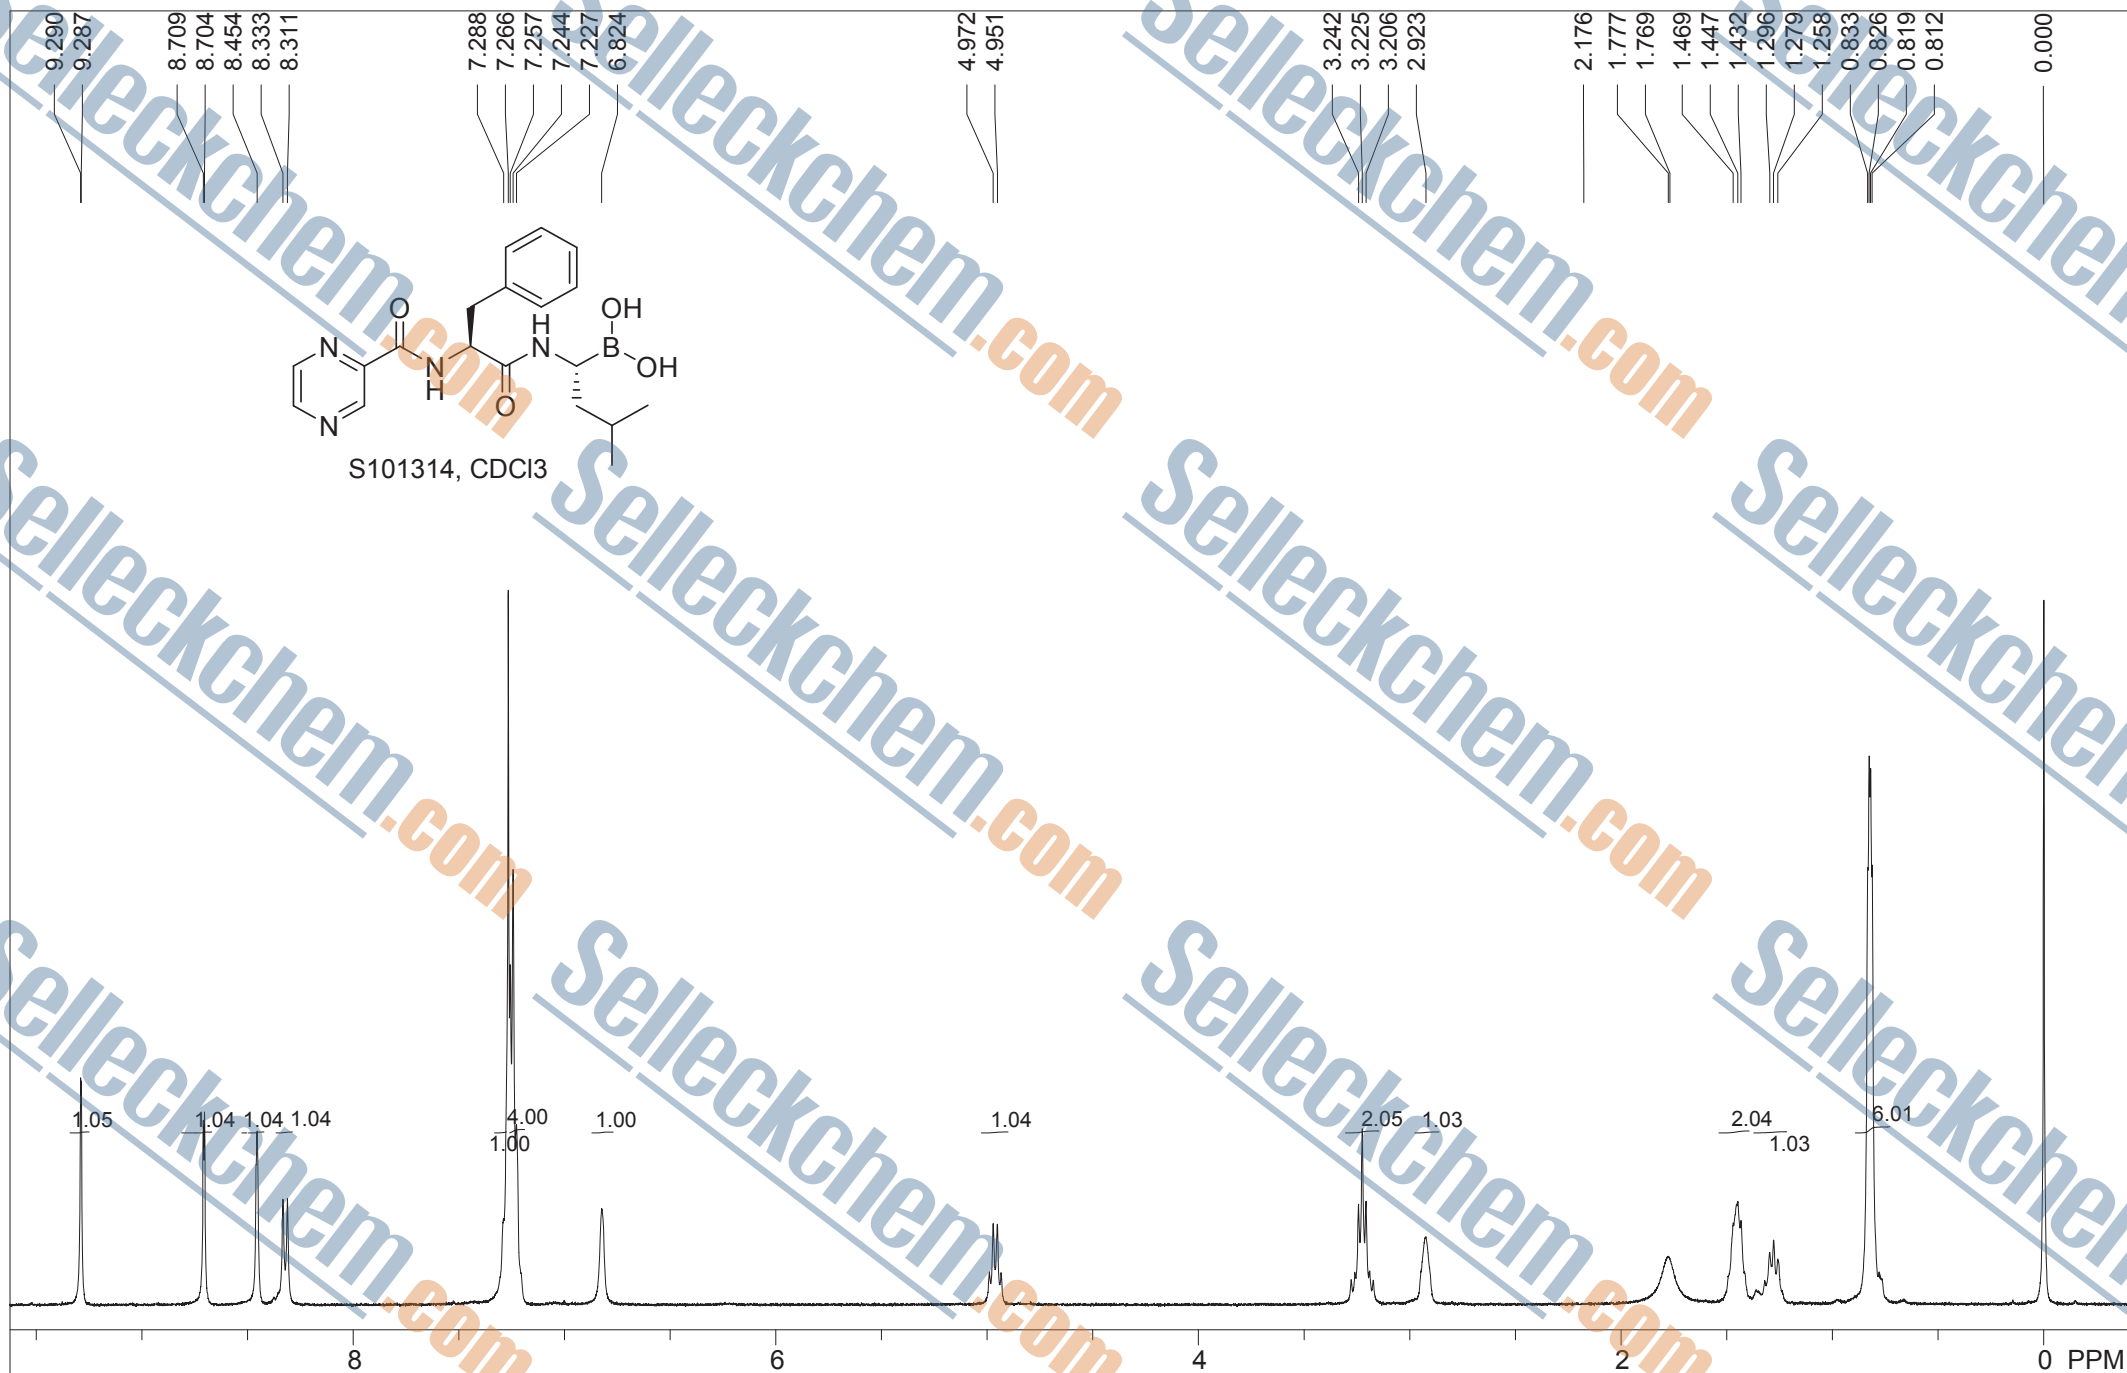

STANDARD PROTON PARAMETERS

|             |             |             |             |                     |
|-------------|-------------|-------------|-------------|---------------------|
| F1: 399.663 | F2: 100.504 | SW1: 8803   | OF1: 3600.8 | PTS1d: 32768, 32768 |
| EX: s2pul   | PW: 6.5 us  | PD: 2.0 sec | NA: 8       | LB: 0.0             |

Nuts - S101314 Bortezomib CDCl<sub>3</sub>

```

=====
Acq. Operator   : SYSTEM                      Seq. Line :    4
Acq. Instrument : 12601c                     Location  : Vial 64

                                     Inj Volume : 2.000 µl
Different Inj Volume from Sample Entry! Actual Inj Volume : 5.000 µl
=====
    
```

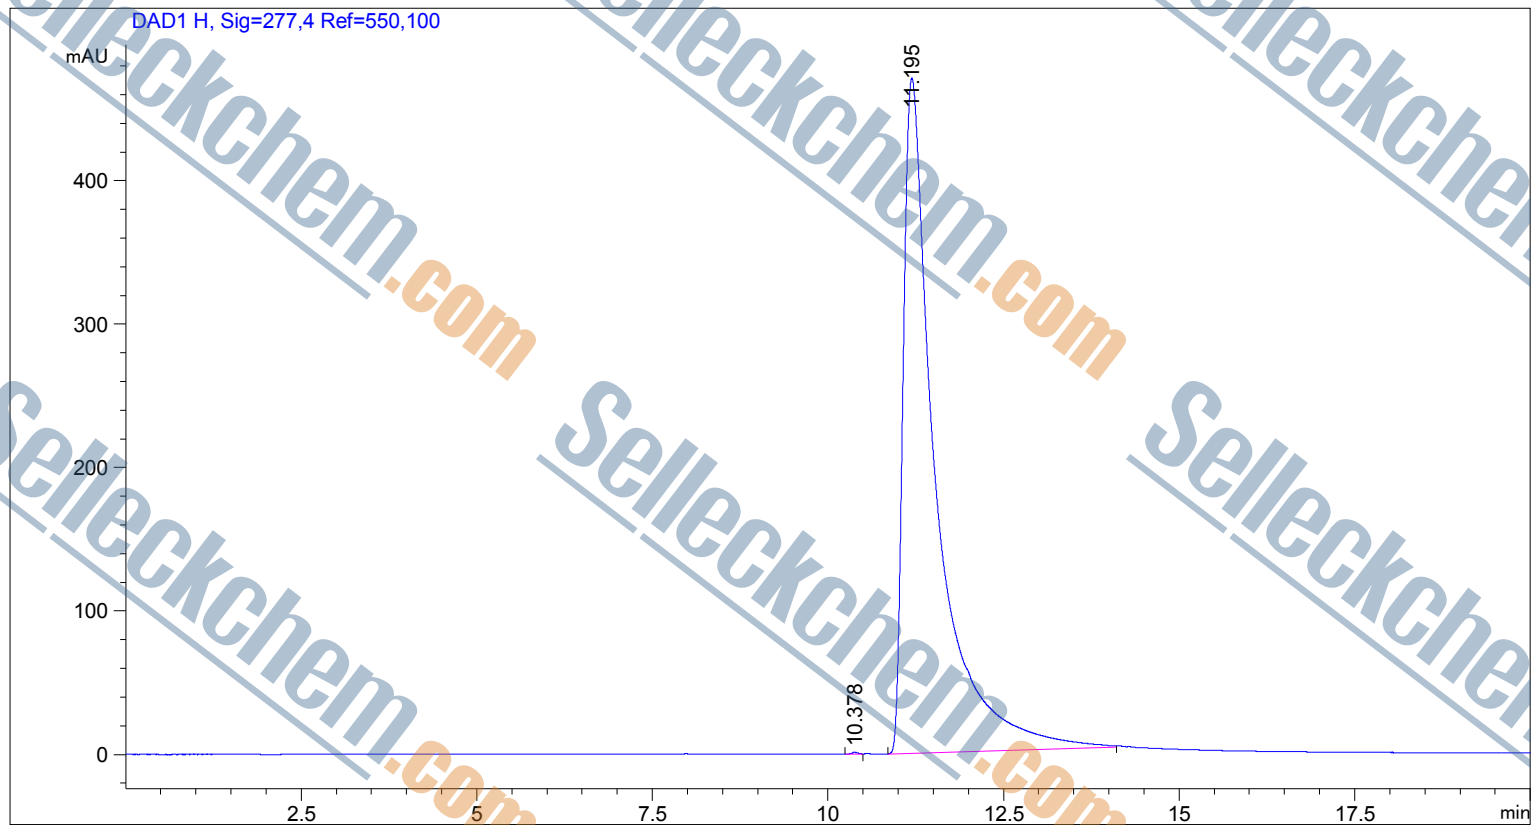

=====  
 Area Percent Report  
 =====

```

Sorted By       :      Signal
Multiplier      :      1.0000
Dilution        :      1.0000
Use Multiplier & Dilution Factor with ISTDs
    
```

Signal 1: DAD1 H, Sig=277,4 Ref=550,100

| Peak #   | RetTime [min] | Type | Width [min] | Area [mAU*s] | Height [mAU] | Area %  |
|----------|---------------|------|-------------|--------------|--------------|---------|
| 1        | 10.378        | BB   | 0.0828      | 6.87275      | 1.25733      | 0.0452  |
| 2        | 11.195        | BV   | 0.4556      | 1.52096e4    | 470.60629    | 99.9548 |
| Totals : |               |      |             | 1.52165e4    | 471.86362    |         |

=====  
 \*\*\* End of Report \*\*\*

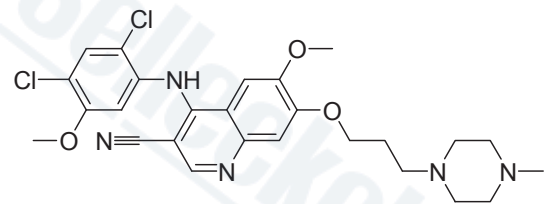

S101450, Methanol-d4

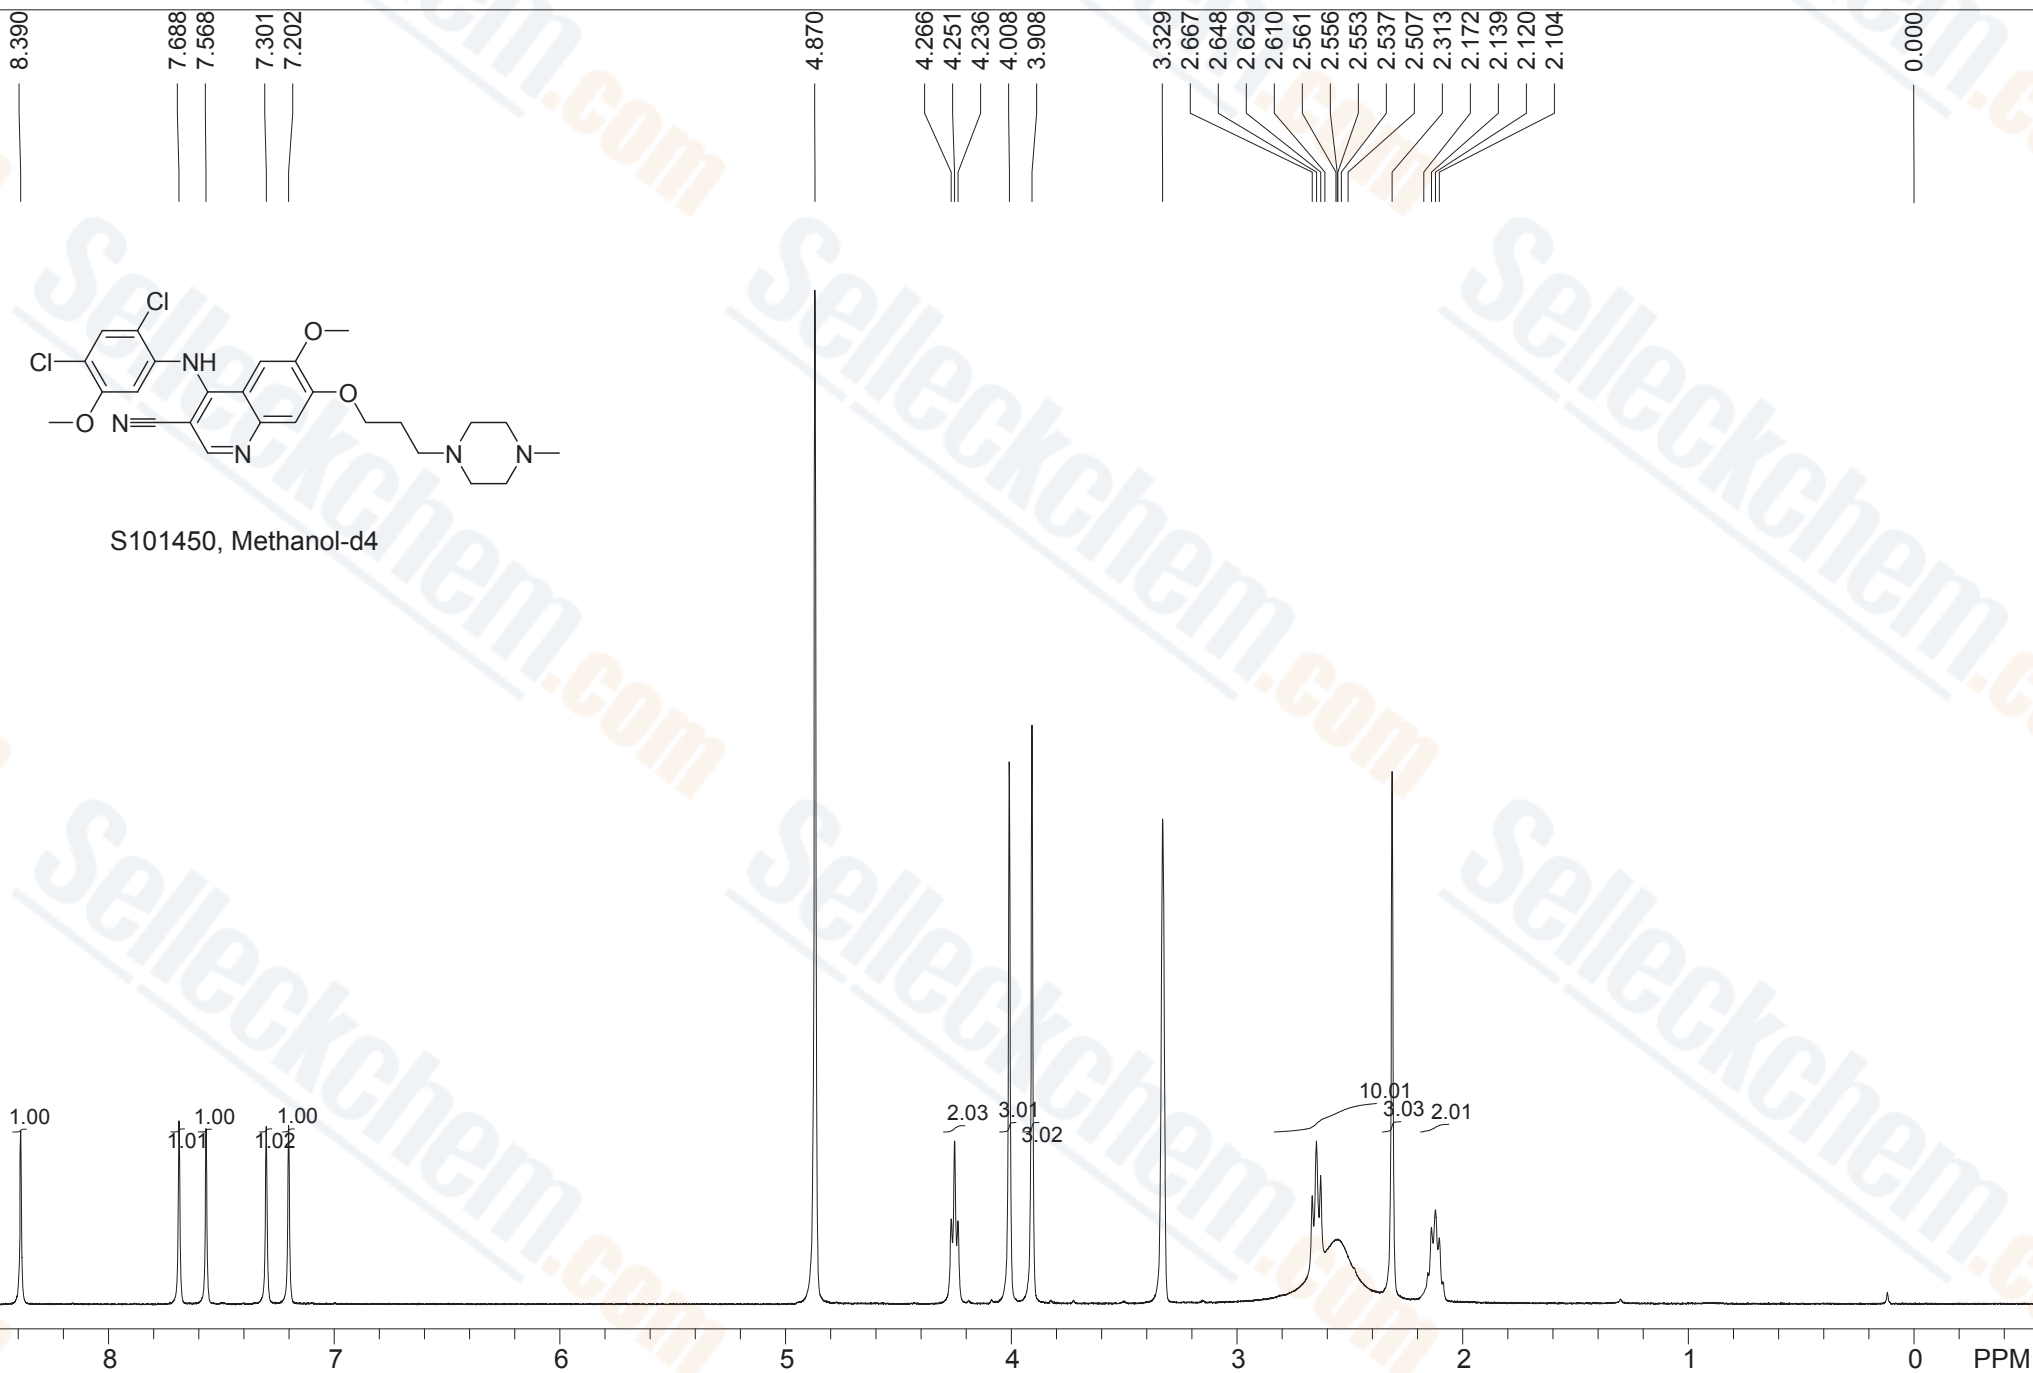

Std proton;blank line

|                                                 |             |             |             |                      |
|-------------------------------------------------|-------------|-------------|-------------|----------------------|
| F1: 399.647                                     | F2: 100.500 | SW1: 8013   | OF1: 2013.9 | PTS1d: 16416 , 32768 |
| EX: s2pul                                       | PW: 7.2 us  | PD: 2.0 sec | NA: 8       | LB: 0.0              |
| Nuts - SS101450 Bosutinib (SKI-606) Methanol-d4 |             |             |             |                      |



# SAMPLE INFORMATION

Sample Name: F3489 S101450 Bosutinib(SKI-606)      Acquire By: System  
Sample Type:      Acq. Method Set: Z  
Viat: 1  
Injection #: 4  
Injection Volume: 20.00 ul      Processing Method: 269  
Run Time: 30.0 Minutes      Channel Name:  
Sample Set Name:      Proc. Chnl. Descr: 269

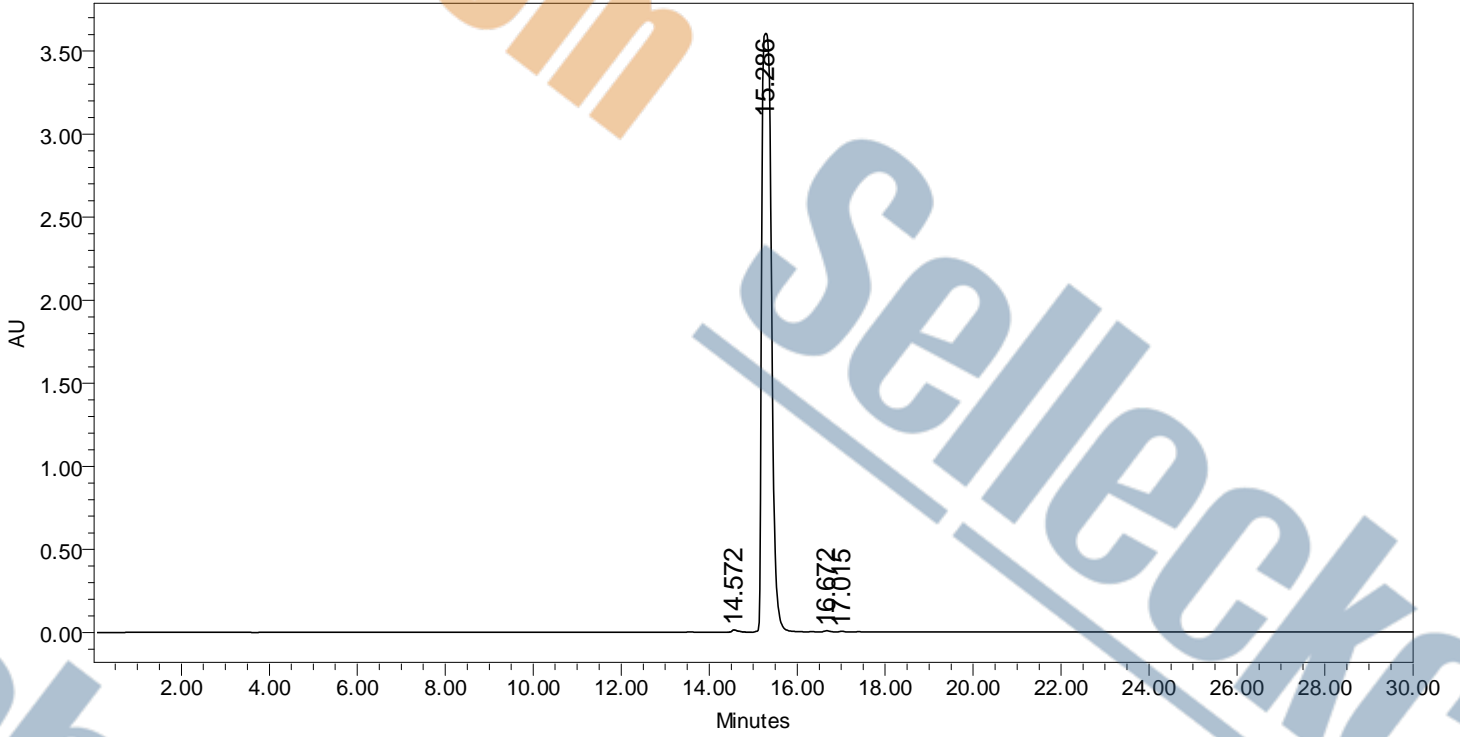

|   | RT     | Area     | Height  | % Area |
|---|--------|----------|---------|--------|
| 1 | 14.572 | 121910   | 13184   | 0.22   |
| 2 | 15.286 | 54574546 | 3603720 | 99.64  |
| 3 | 16.672 | 54874    | 6942    | 0.10   |
| 4 | 17.015 | 21588    | 2777    | 0.04   |

# SAMPLE INFORMATION

Sample Name: F1982 S101705 AZD2171  
 Sample Type:  
 Viat: 1  
 Injection #: 4  
 Injection Volume: 20.00 ul  
 Run Time: 30.0 Minutes  
 Sample Set Name:

Acquirde By: System  
 Acq. Method Set: Y  
 Processing Method: 250  
 Channel Name:  
 Proc. Chnl. Descr: 250

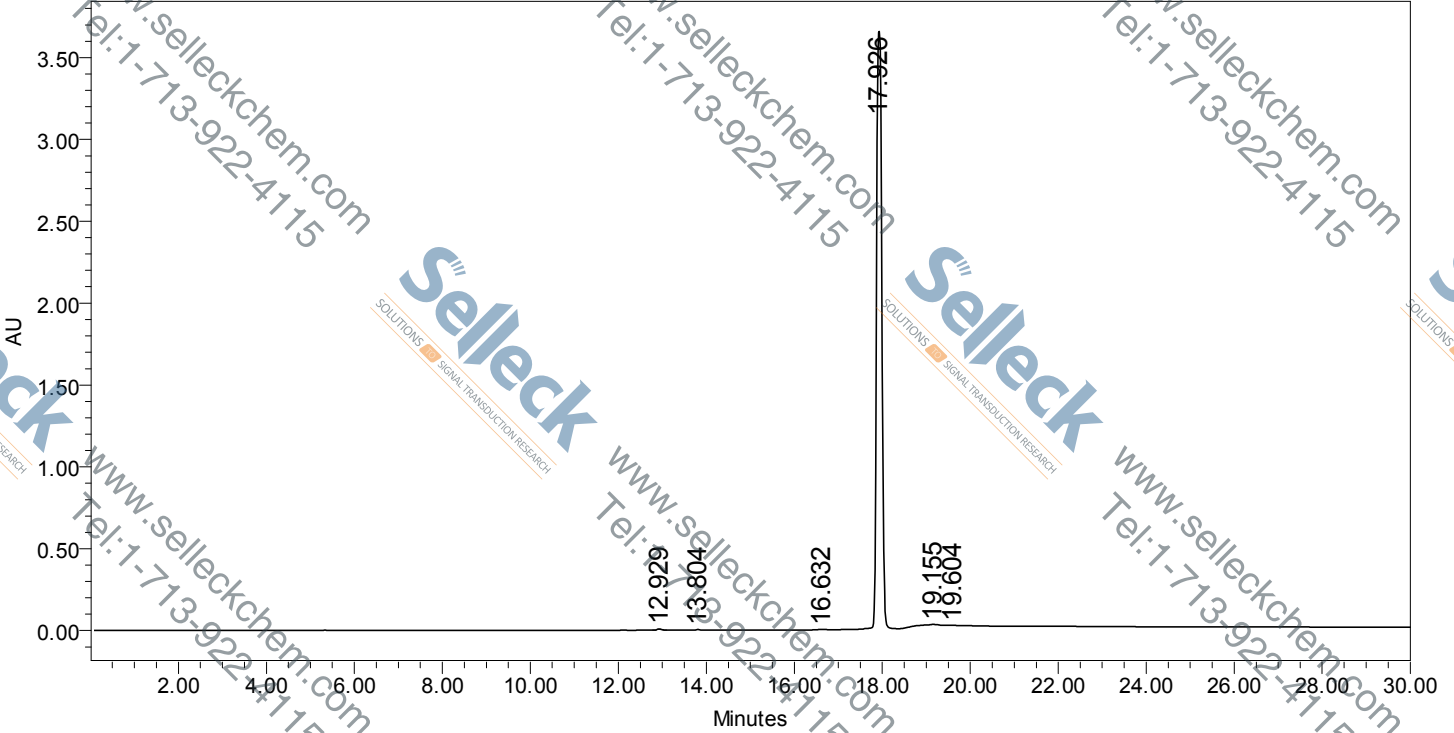

|   | RT     | Area     | Height  | % Area |
|---|--------|----------|---------|--------|
| 1 | 12.929 | 51439    | 7036    | 0.17   |
| 2 | 13.804 | 21445    | 2859    | 0.07   |
| 3 | 16.632 | 25707    | 2845    | 0.09   |
| 4 | 17.926 | 29943486 | 3675602 | 99.53  |
| 5 | 19.155 | 36514    | 3695    | 0.12   |
| 6 | 19.604 | 7245     | 1667    | 0.02   |

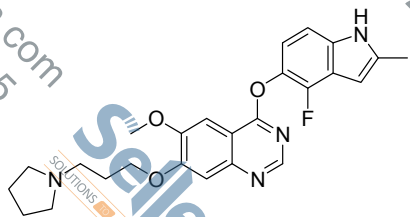

S101705, Methanol-d4

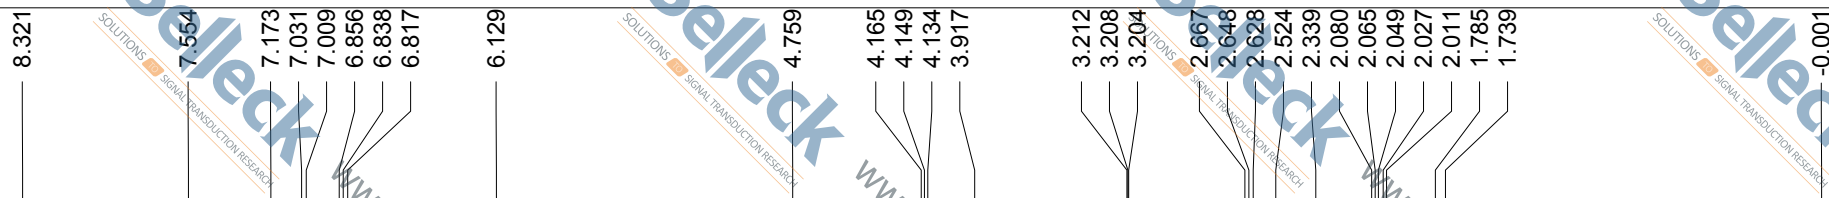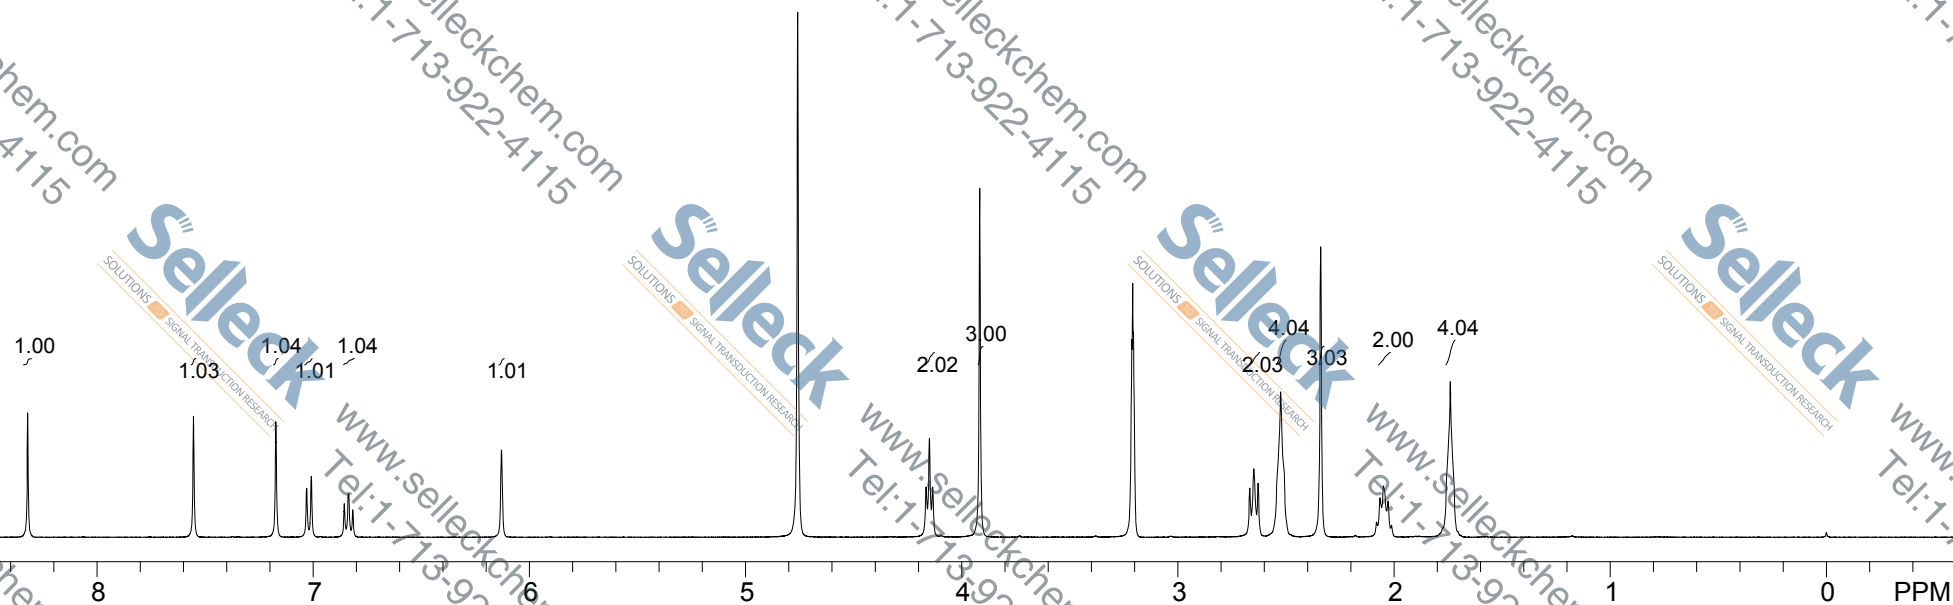

Std proton:blank line

|                                                   |             |             |             |                      |
|---------------------------------------------------|-------------|-------------|-------------|----------------------|
| F1: 399.647                                       | F2: 100.500 | SW1: 8013   | OF1: 1966.0 | PTS1d: 16416 , 32768 |
| EX: s2pul                                         | PW: 7.2 us  | PD: 2.0 sec | NA: 8       | LB: 0.0              |
| Nuts - \$\$S101705 Cediranib(AZD2171) Methanol-d4 |             |             |             |                      |

# SAMPLE INFORMATION

Sample Name: F1620 S101806 CHIR-258  
Sample Type:  
Vial: 1  
Injection #: 8  
Injection Volume: 20.00 ul  
Run Time: 30.0 Minutes  
Sample Set Name:

Acquire By: System  
Acq. Method Set: Y  
Processing Method: 254  
Channel Name:  
Proc. Chnl. Descr: 254

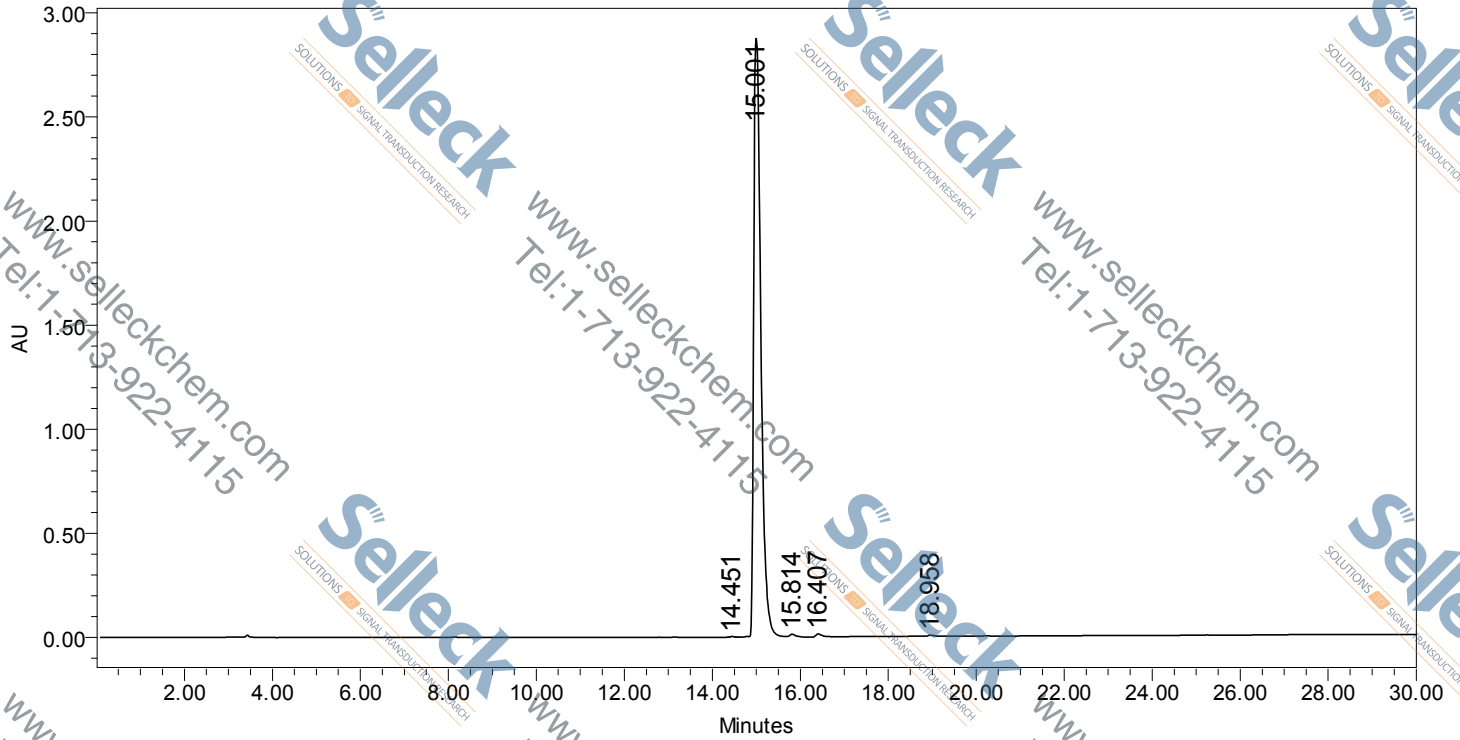

|   | RT     | Area     | Height  | % Area |
|---|--------|----------|---------|--------|
| 1 | 14.451 | 29715    | 3383    | 0.09   |
| 2 | 15.001 | 32466444 | 2881362 | 99.25  |
| 3 | 15.814 | 80897    | 11334   | 0.25   |
| 4 | 16.407 | 100354   | 13196   | 0.31   |
| 5 | 18.958 | 35184    | 4933    | 0.11   |

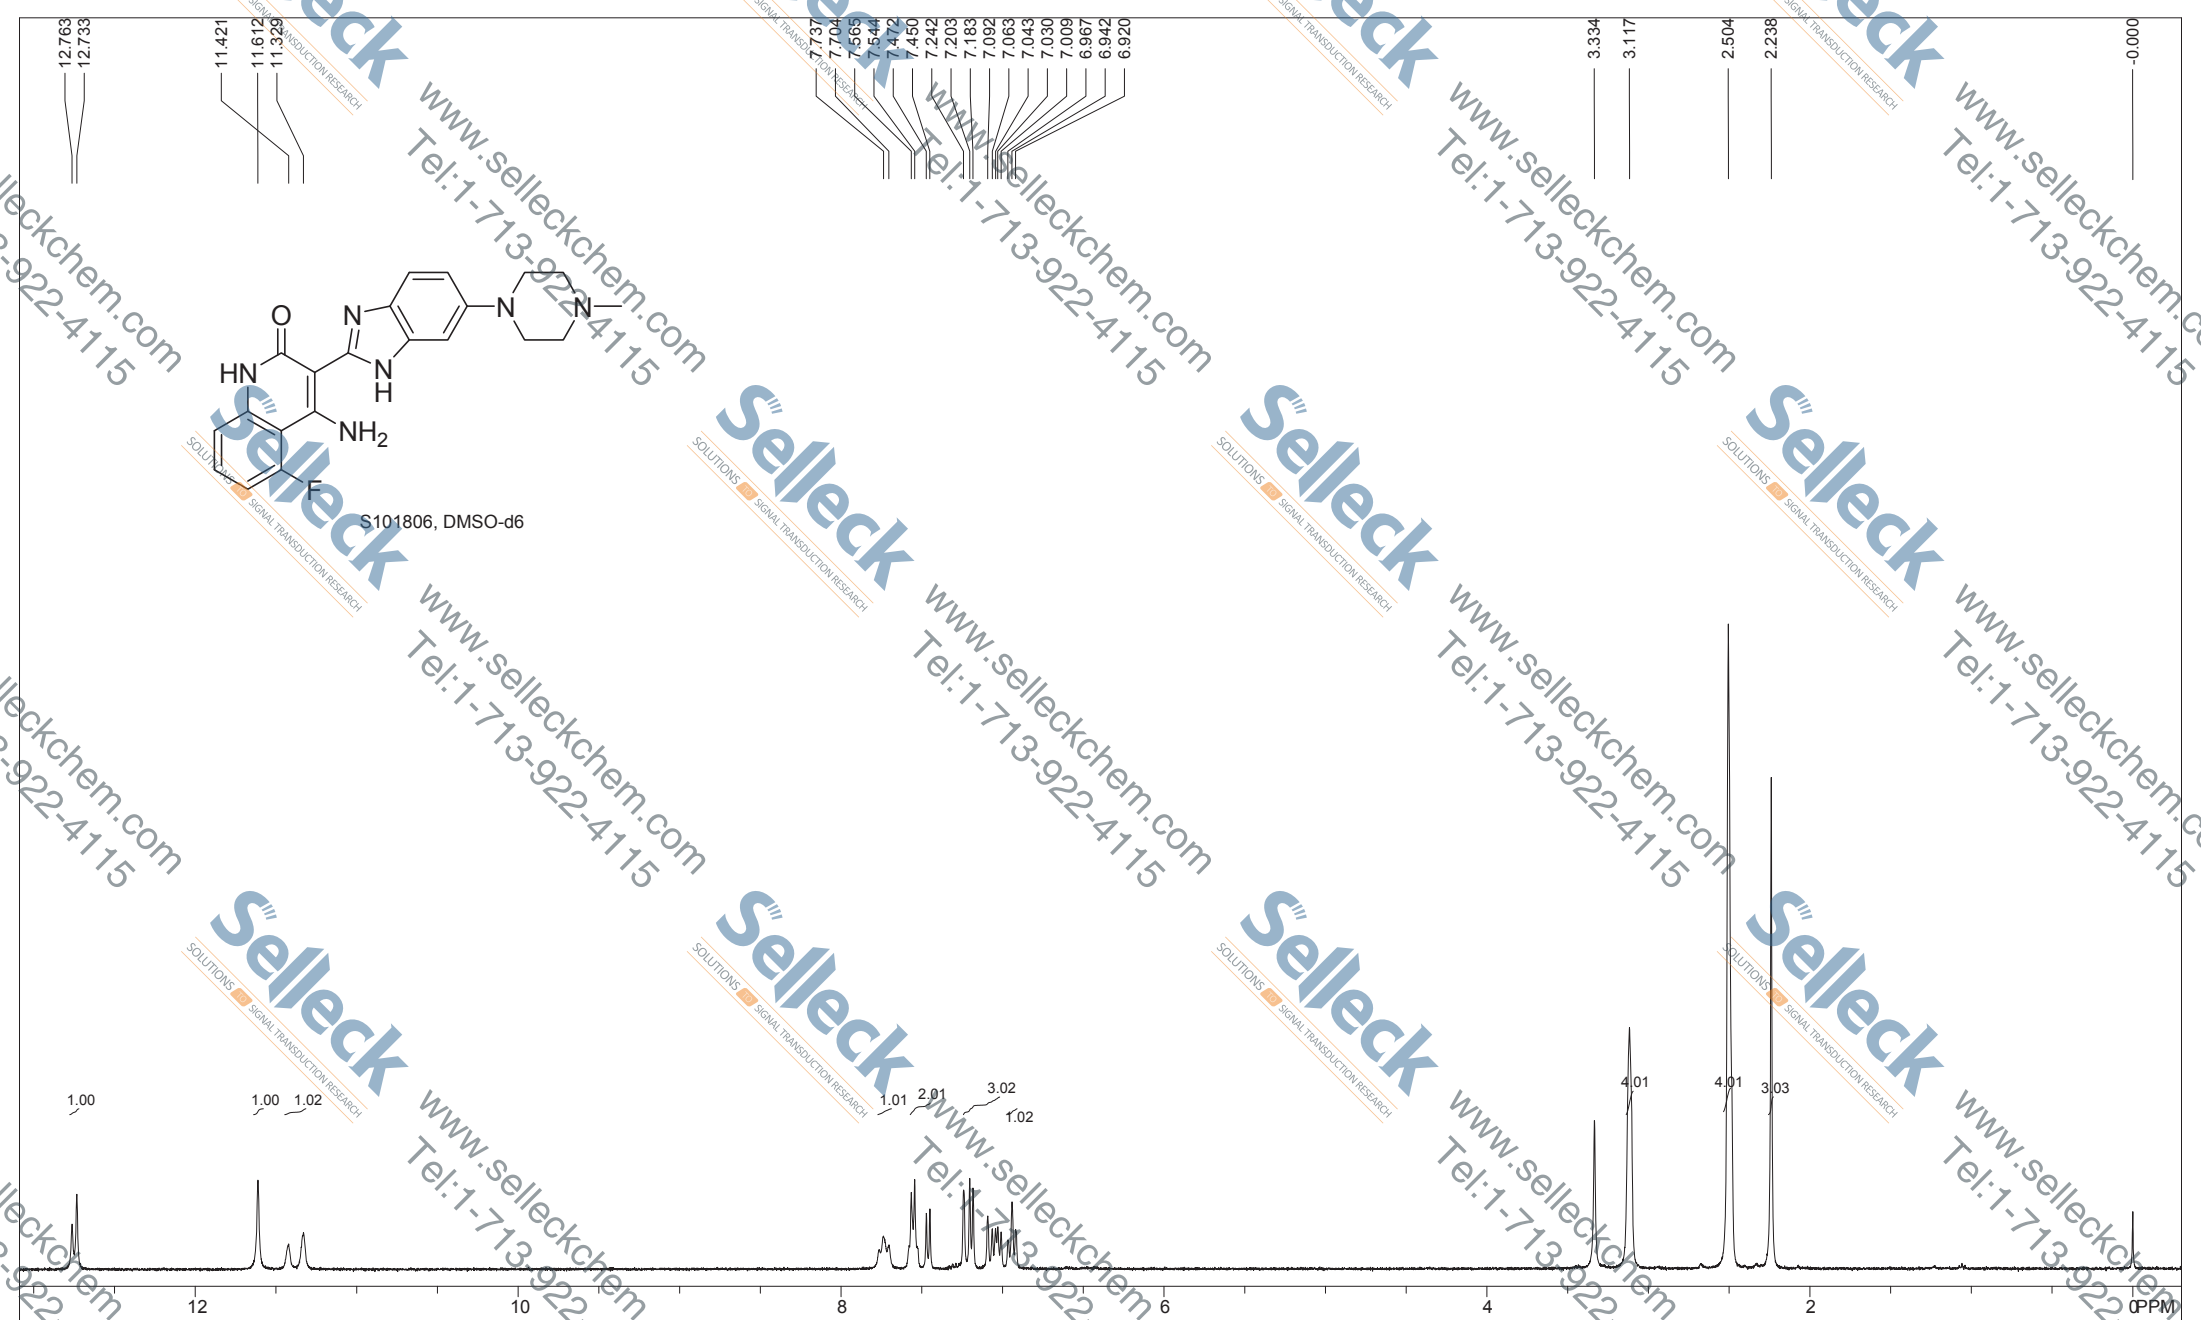

|                       |             |            |             |             |         |              |                         |
|-----------------------|-------------|------------|-------------|-------------|---------|--------------|-------------------------|
| Std proton blank line |             |            |             |             |         |              |                         |
| F1: 399.637           | F2: 100.498 | SW1: 7225  | PD: 2.0 sec | OFF: 2812.2 | LB: 0.0 | PTSId: 14803 | 16384                   |
| EX: s2pul             |             | PW: 7.2 us |             | NA: 8       |         |              | Nuts - S101806 CHIR-258 |

## SAMPLE INFORMATION

|                                   |                             |
|-----------------------------------|-----------------------------|
| Sample Name: F794 S101902 CI-1033 | Acquired By: System         |
| Sample Type: Unknown              |                             |
| Vial: 1                           | Acq. Method Set: 2487       |
| Injection #: 5                    | Processing Method: 341      |
| Injection Volume: 20.00 ul        | Channel Name: 2487Channel 1 |
| Run Time: 30.0 Minutes            | Proc. Chnl. Descr.: 341     |
| Sample Set Name                   |                             |

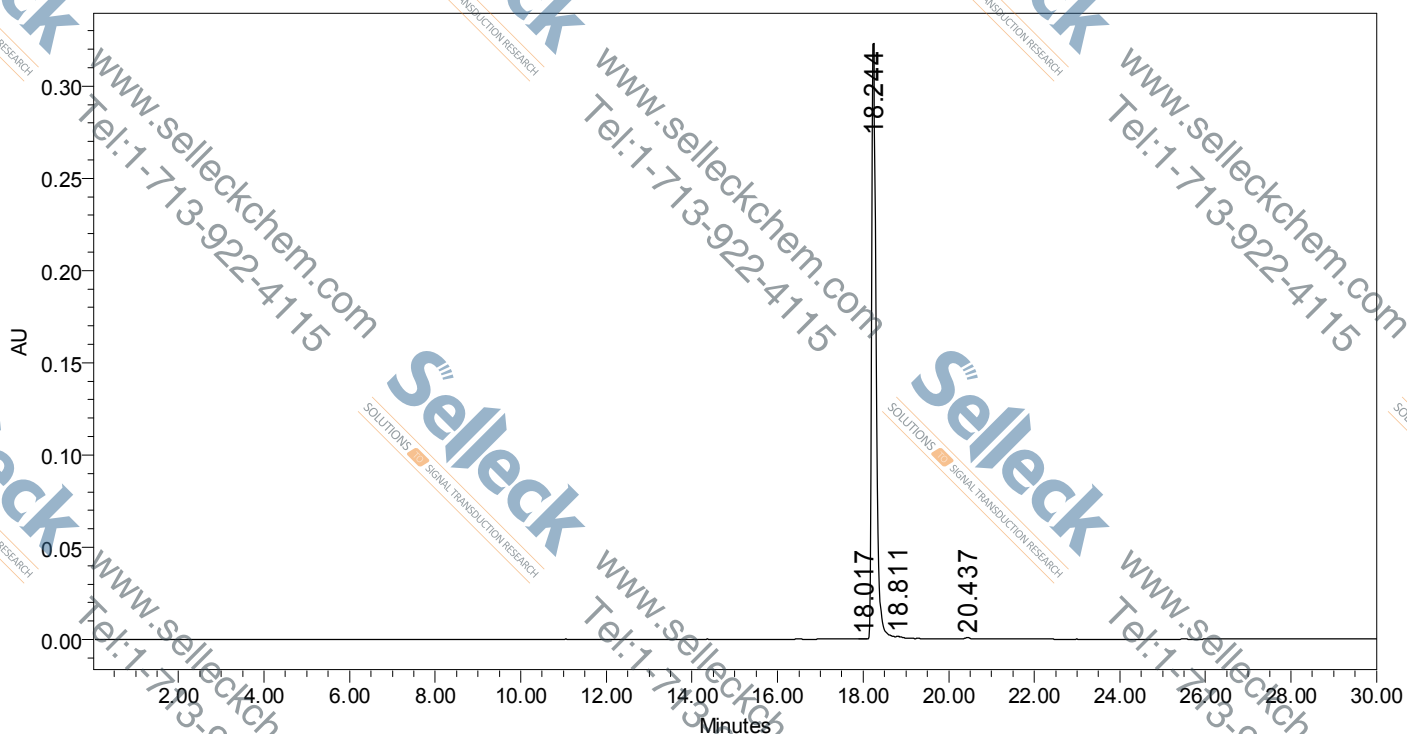

|   | RT     | Area    | % Area | Height |
|---|--------|---------|--------|--------|
| 1 | 18.017 | 14185   | 0.06   | 212    |
| 2 | 18.244 | 2338368 | 99.28  | 324267 |
| 3 | 18.811 | 10763   | 0.46   | 1127   |
| 4 | 20.437 | 4751    | 0.20   | 658    |

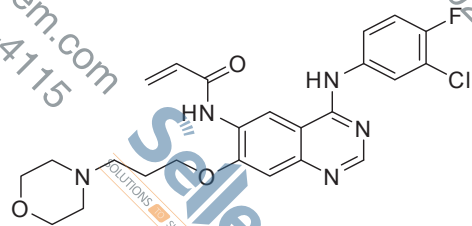

S101902, DMSO-d6

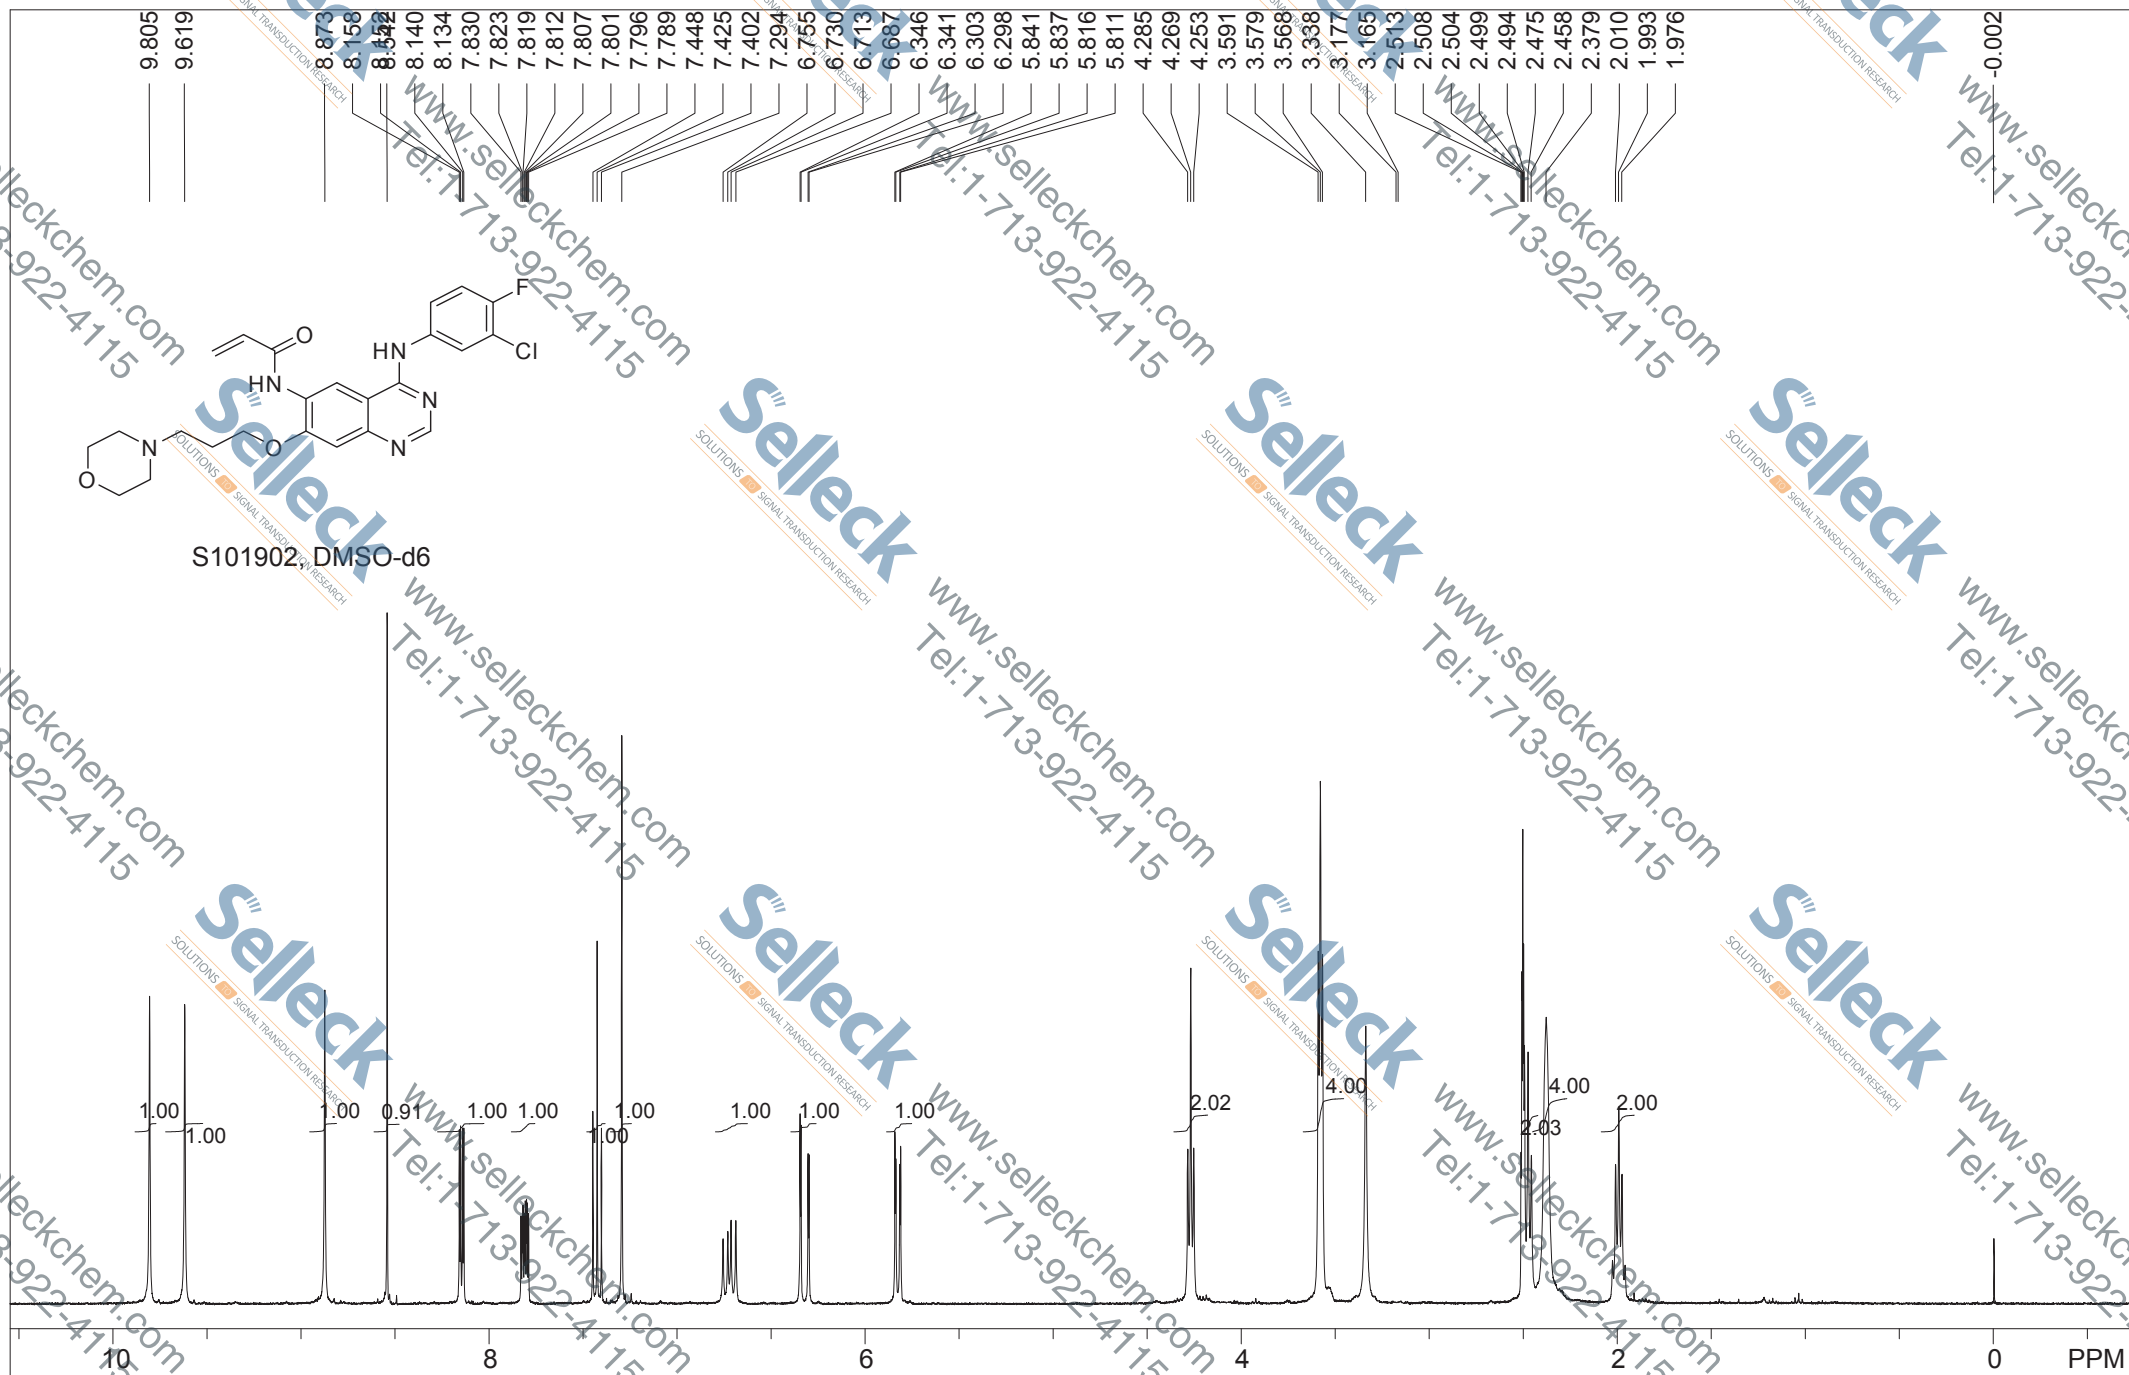

Std proton:blank line

|             |             |             |             |                     |
|-------------|-------------|-------------|-------------|---------------------|
| F1: 399.635 | F2: 100.497 | SW1: 8065   | OF1: 3225.5 | PTS1d: 16521, 32768 |
| EX: s2pul   | PW: 7.2 us  | PD: 2.0 sec | NA: 8       | LB: 0.0             |

Nuts: S101902 CI-1033(Canertinib)

## SAMPLE INFORMATION

|                                      |                             |
|--------------------------------------|-----------------------------|
| Sample Name: F1060 S102108 Dasatinib | Acquired By: System         |
| Sample Type: Unknown                 |                             |
| Vial: 1                              | Acq. Method Set: 2487       |
| Injection #: 2                       | Processing Method: 322      |
| Injection Volume: 20.00 ul           | Channel Name: 2487Channel 1 |
| Run Time: 30.0 Minutes               | Proc. Chnl. Descr.: 322     |
| Sample Set Name:                     |                             |

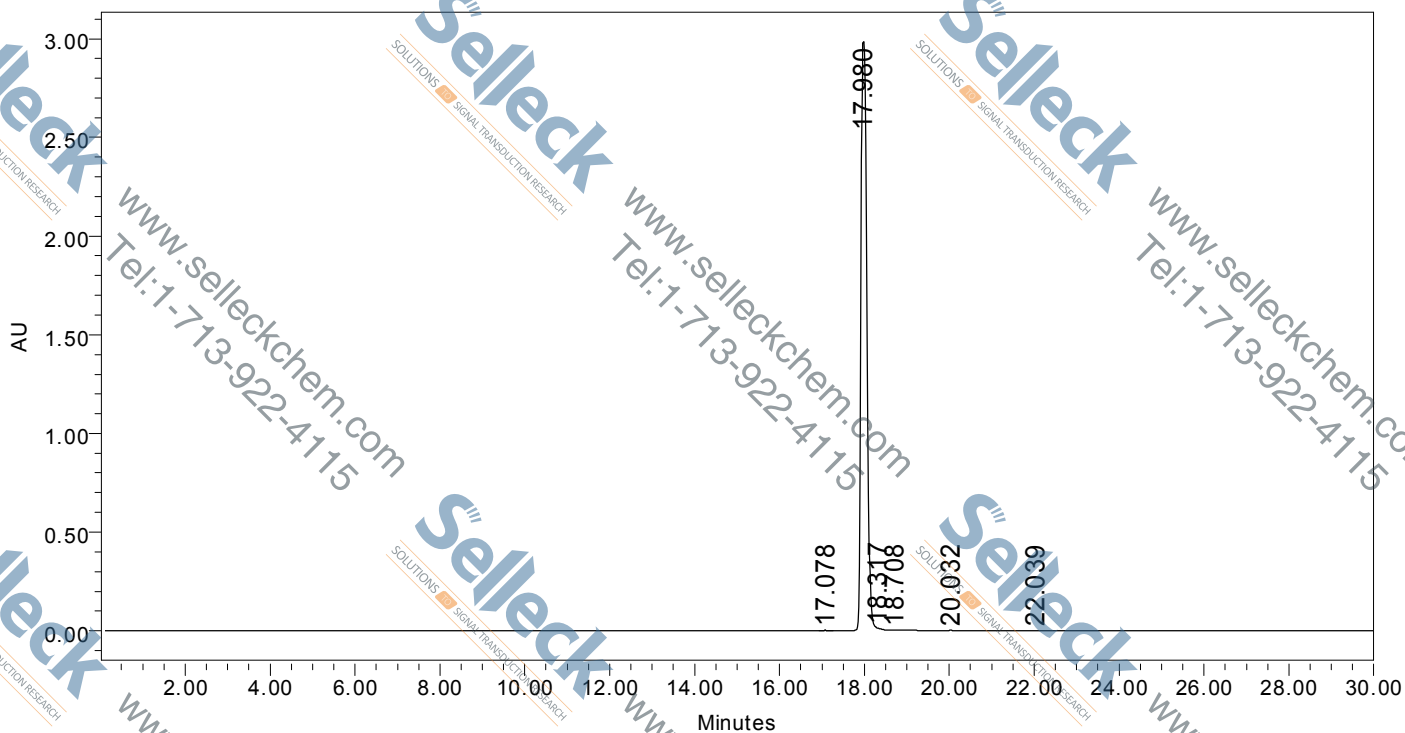

|   | RT     | Area     | % Area | Height  |
|---|--------|----------|--------|---------|
| 1 | 17.078 | 13073    | 0.05   | 1828    |
| 2 | 17.980 | 28658868 | 99.76  | 2992397 |
| 3 | 18.317 | 37850    | 0.13   | 8041    |
| 4 | 18.708 | 4942     | 0.02   | 892     |
| 5 | 20.032 | 6713     | 0.02   | 1001    |
| 6 | 22.039 | 6537     | 0.02   | 1033    |



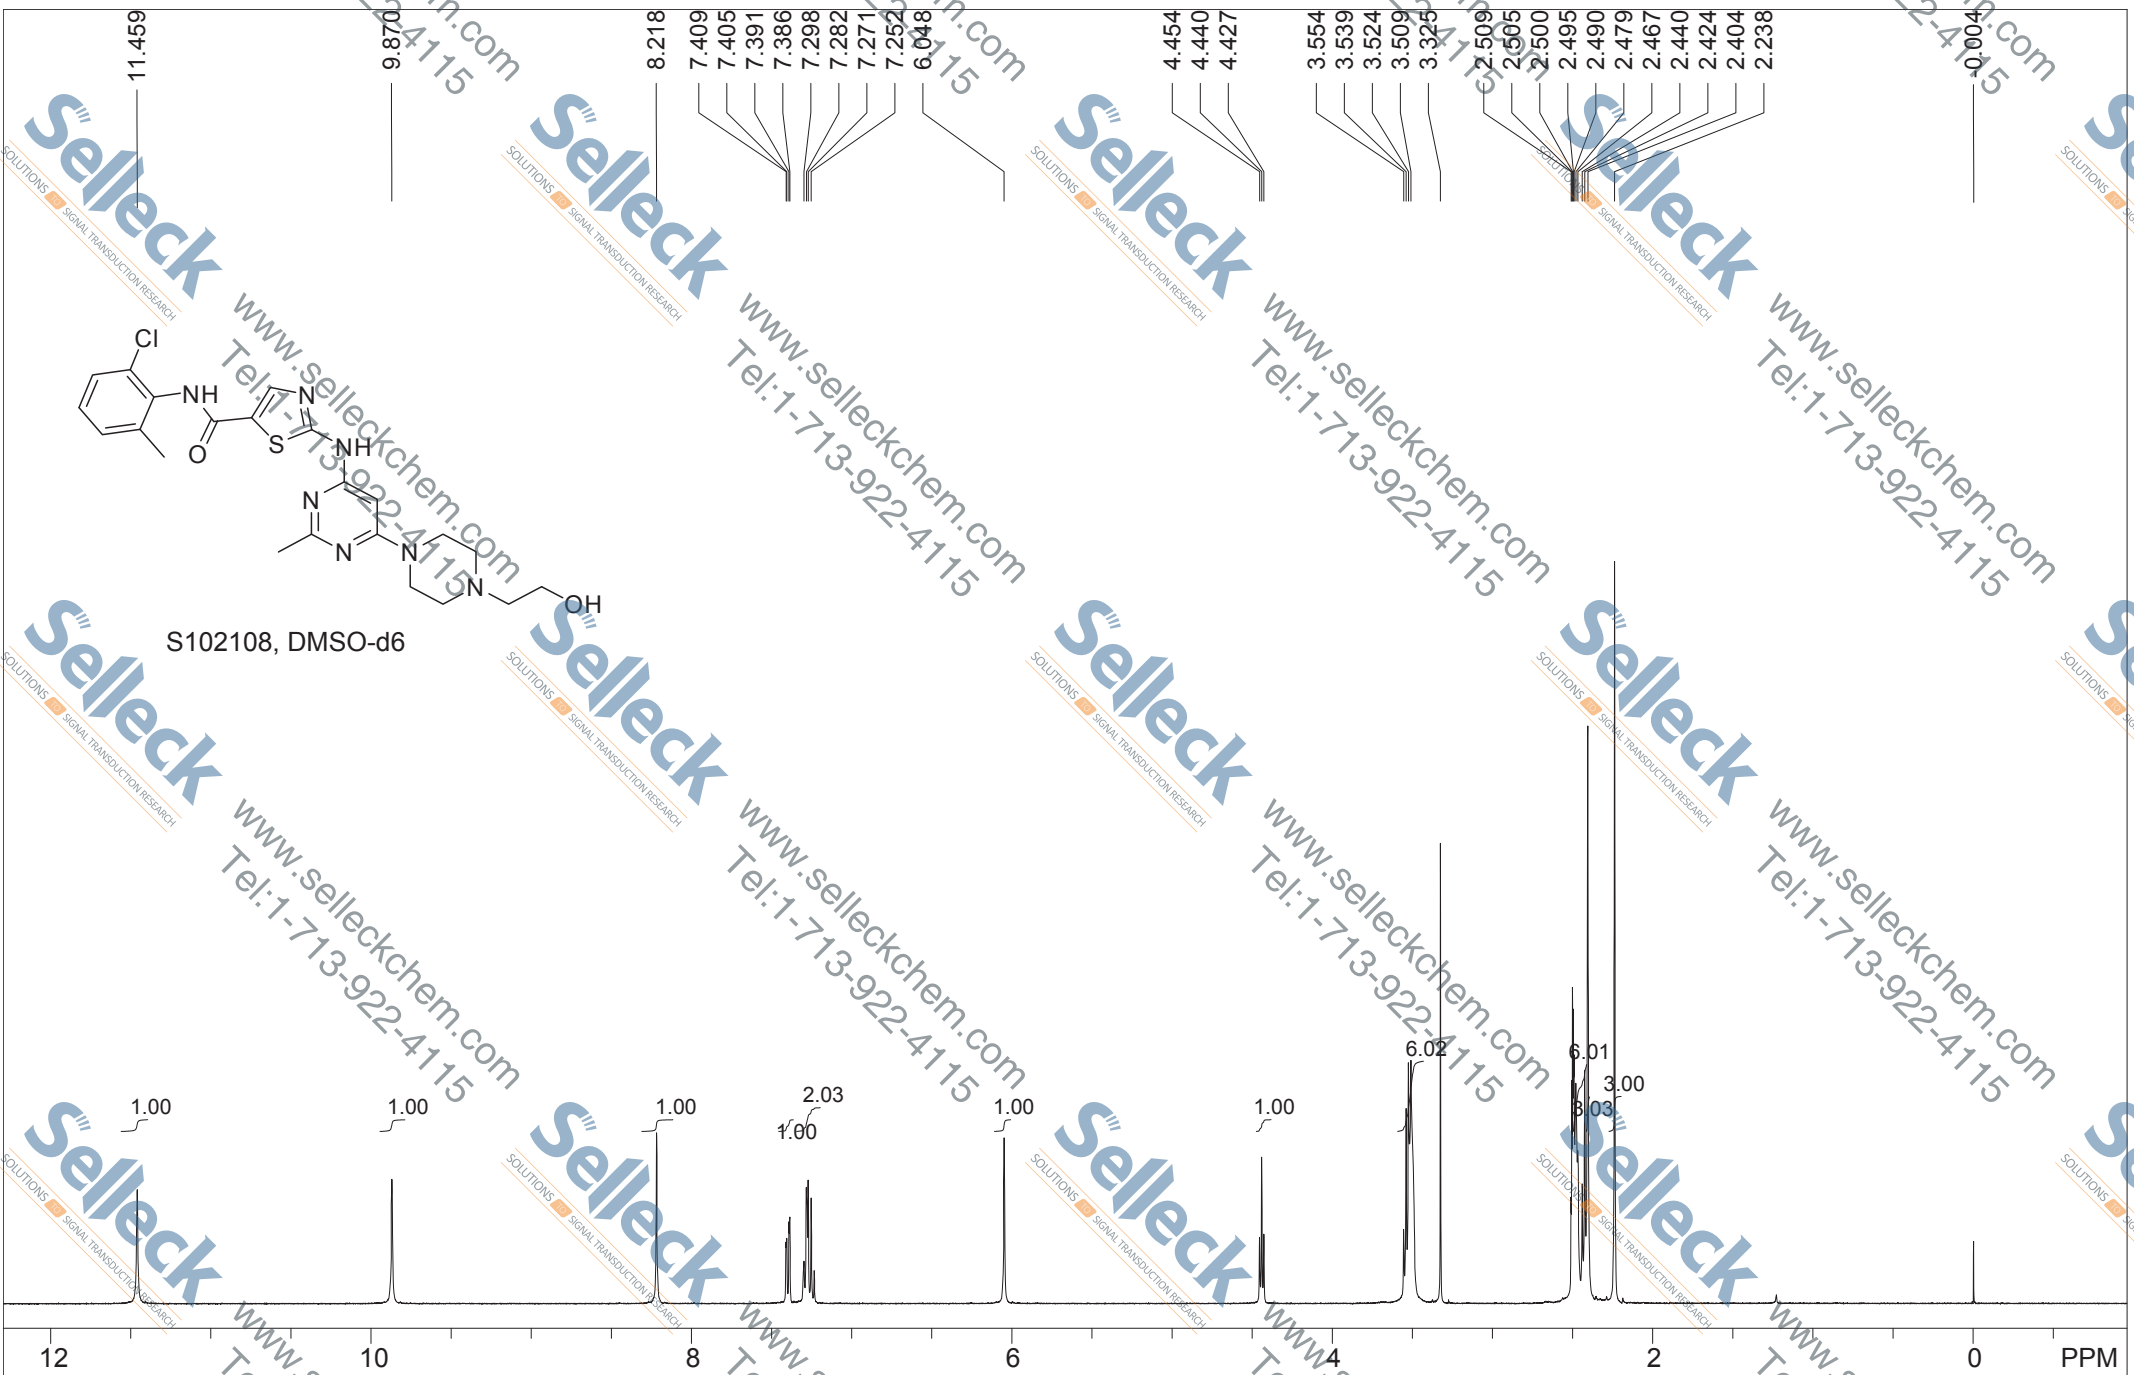

|                        |             |            |             |              |                          |
|------------------------|-------------|------------|-------------|--------------|--------------------------|
| Std proton: blank line |             |            |             |              |                          |
| F1: 399.635            | F2: 100.497 | SW1: 7225  | OF1: 2805.9 | PTS1d: 14803 | 16384                    |
| EX: s2pul              |             | PW: 7.2 us | PD: 2.0 sec | NA: 8        | LB: 0.0                  |
|                        |             |            |             |              | Nuts - S102108 Dasatinib |

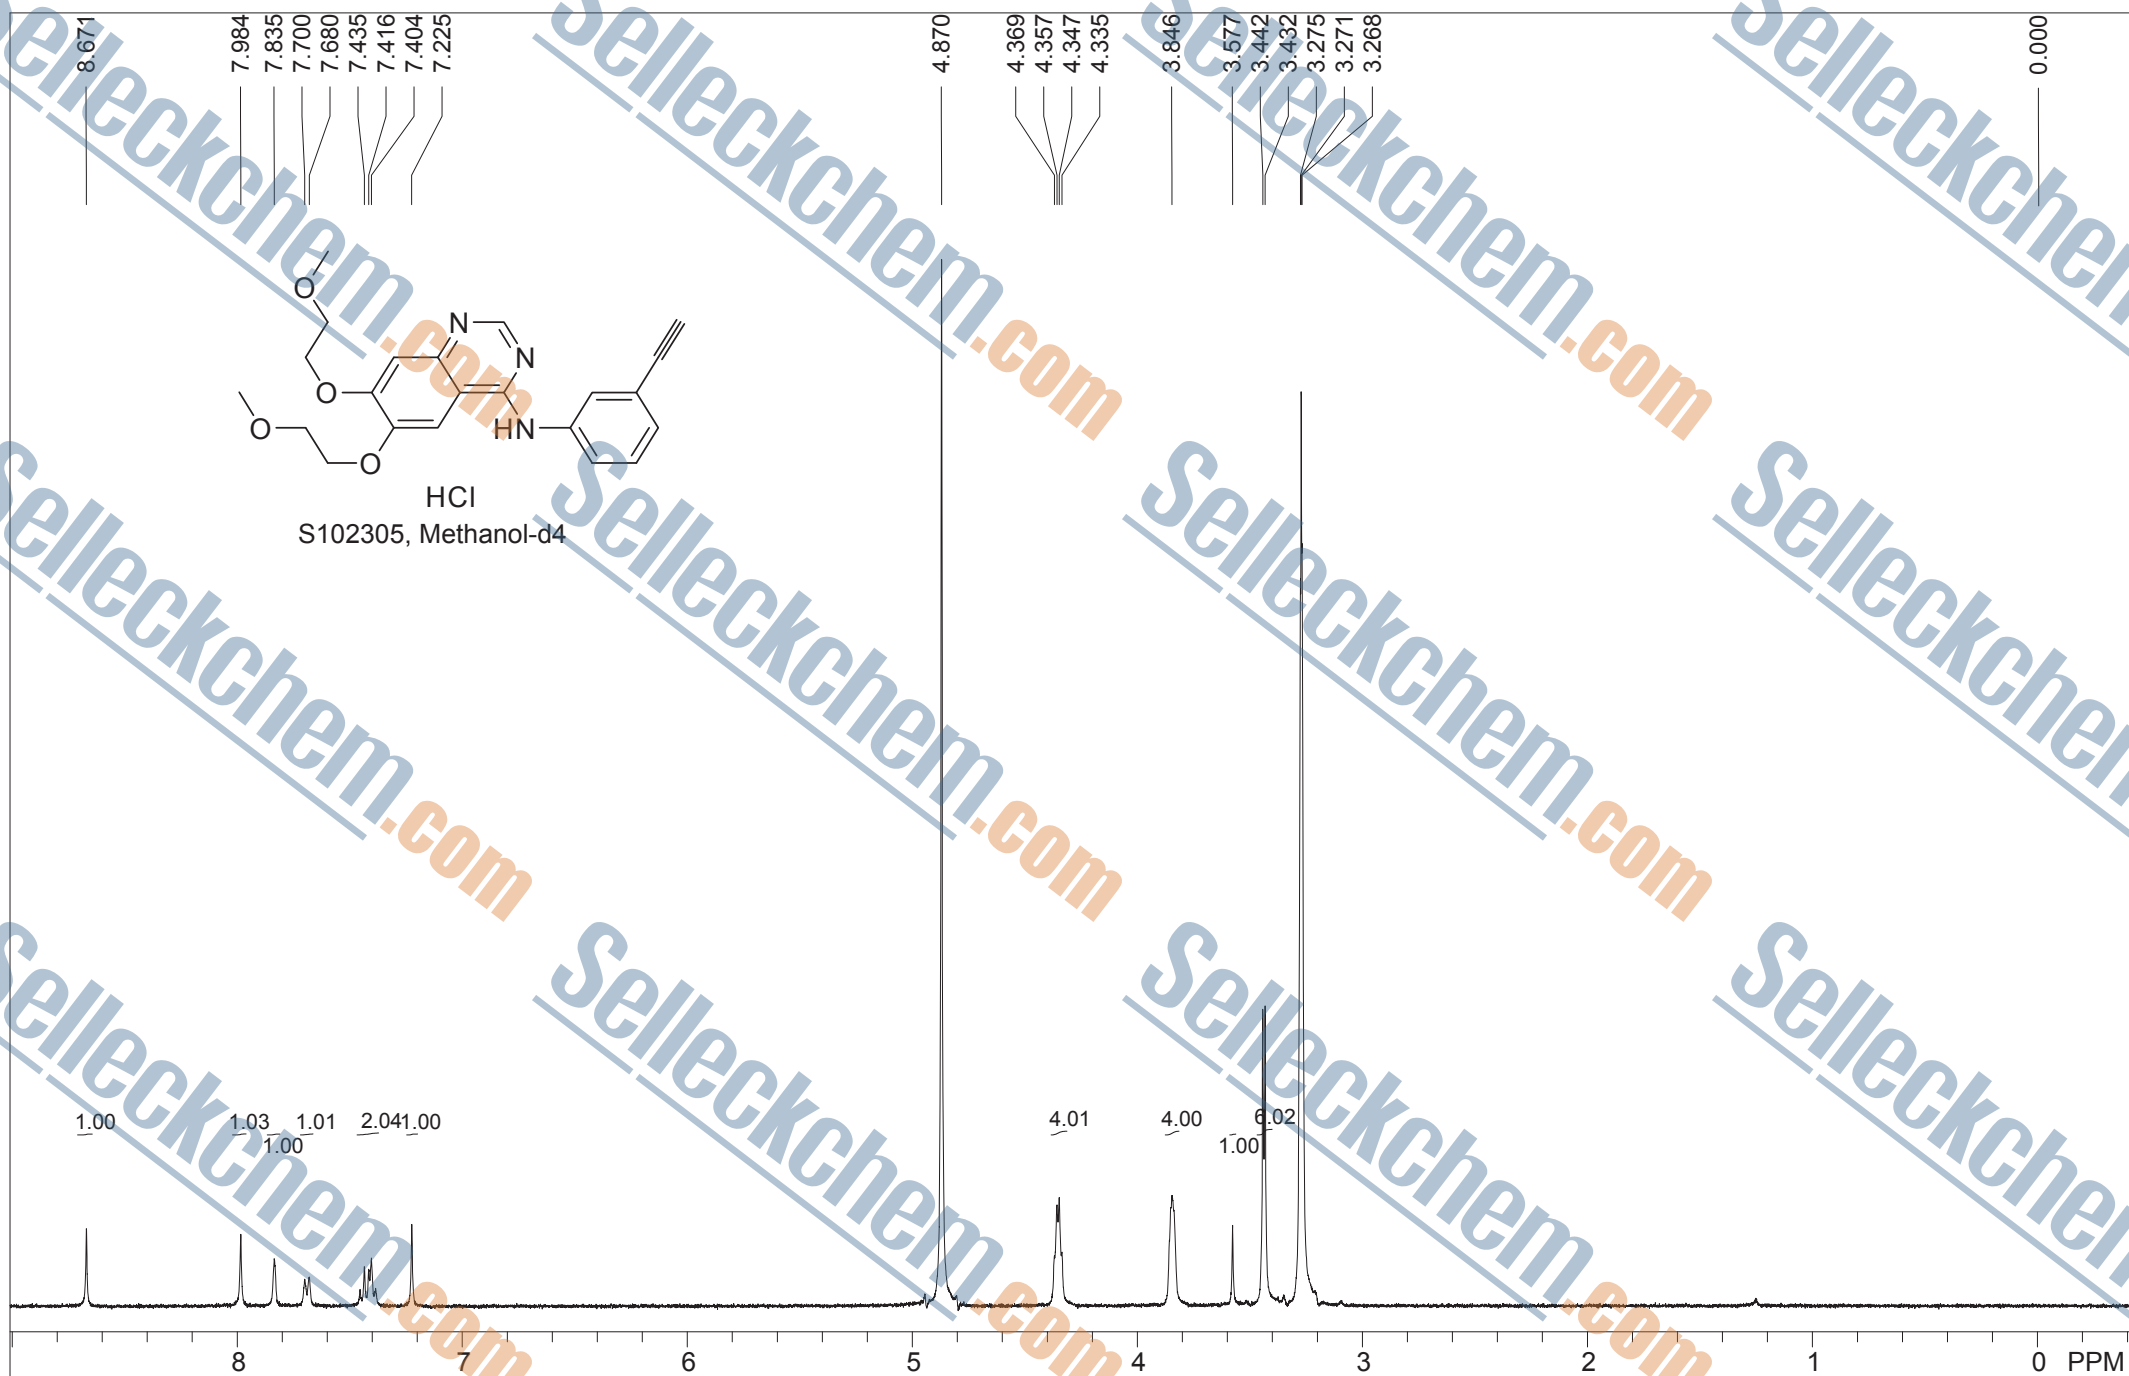

STANDARD PROTON PARAMETERS

|             |             |             |             |                                                                    |
|-------------|-------------|-------------|-------------|--------------------------------------------------------------------|
| F1: 399.657 | F2: 100.503 | SW1: 8803   | OF1: 3586.5 | PTS1d: 32768 , 32768                                               |
| EX: s2pul   | PW: 6.5 us  | PD: 1.0 sec | NA: 8       | LB: 0.0 Nuts - S102305 Erlotinib Hydrochloride recheck Methanol-d4 |

# SAMPLE INFORMATION

Sample Name: F4588 S102305 Erlotinib HCl  
Sample Type:  
Viat: 1  
Injection #: 5  
Injection Volume: 20.00 ul  
Run Time: 30.0 Minutes  
Sample Set Name:

Acquire By: System  
Date Acquired: 2014-3-6 12:05:28  
Acq. Method Set: Z  
Date Processed: 2014-3-6 12:35:35  
Processing Method: 254  
Channel Name:  
Proc. Chnl. Descr: 254

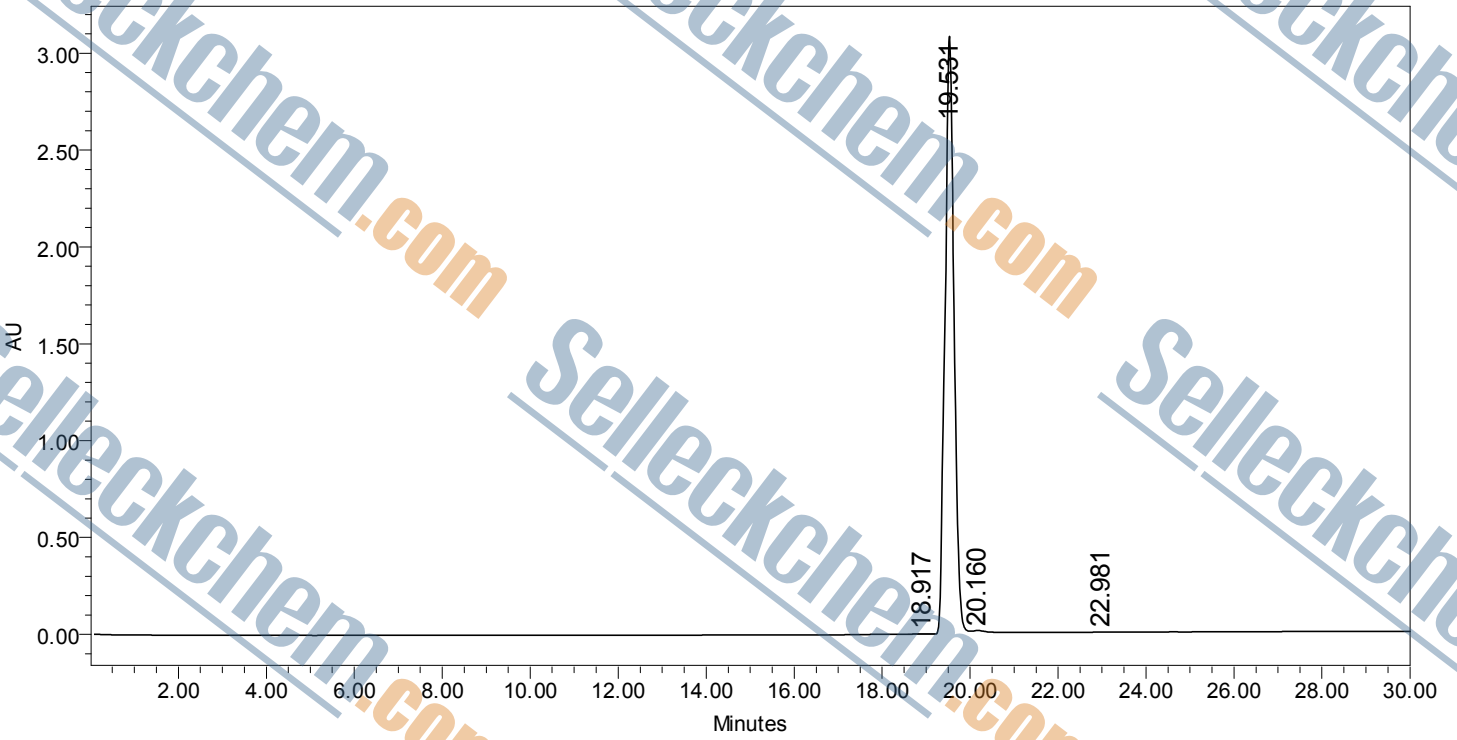

|   | RT     | Area     | Height  | % Area |
|---|--------|----------|---------|--------|
| 1 | 18.917 | 36560    | 1794    | 0.08   |
| 2 | 19.531 | 43954268 | 3084849 | 99.35  |
| 3 | 20.160 | 233821   | 11657   | 0.53   |
| 4 | 22.981 | 17842    | 1441    | 0.04   |

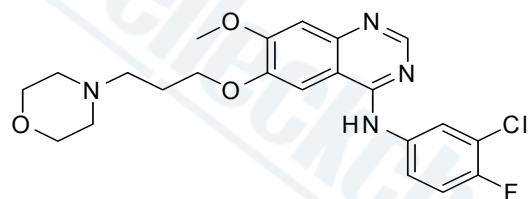

S102505, DMSO-d6

9.554  
8.500  
8.134  
8.127  
8.117  
8.110  
7.818  
7.805  
7.796  
7.789  
7.785  
7.778  
7.468  
7.446  
7.423  
7.203

4.199  
4.184  
4.167  
3.941  
3.596  
3.584  
3.573  
3.331  
2.515  
2.511  
2.506  
2.502  
2.484  
2.467  
2.396  
2.033  
2.016  
2.000  
1.983  
1.967  
-0.000

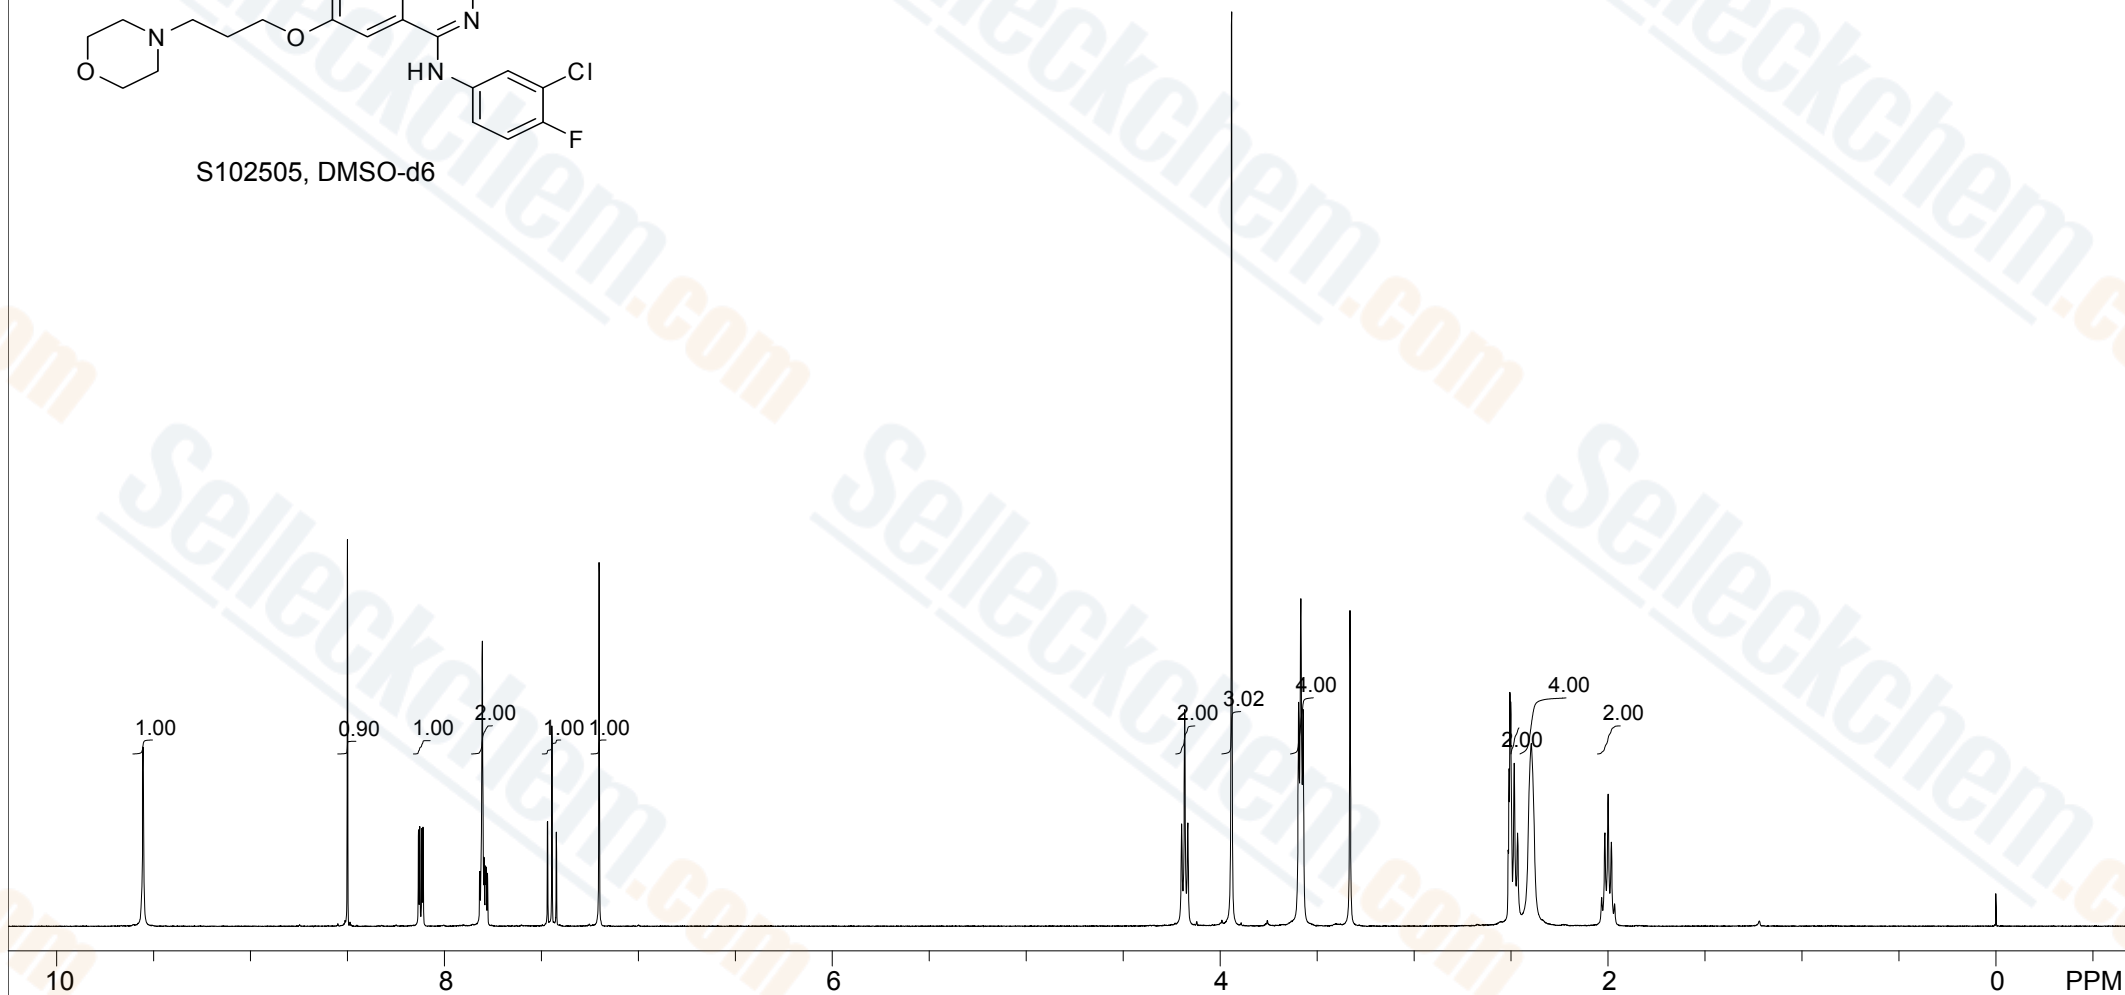

Std proton:blank line

|             |             |             |             |                      |
|-------------|-------------|-------------|-------------|----------------------|
| F1: 399.635 | F2: 100.497 | SW1: 7225   | OF1: 2808.3 | PTS1d: 14803 , 16384 |
| EX: s2pul   | PW: 7.2 us  | PD: 2.0 sec | NA: 8       | LB: 0.0              |

Nuts - \$\$S102505 Gefitinib

## SAMPLE INFORMATION

|                   |                         |                     |               |
|-------------------|-------------------------|---------------------|---------------|
| Sample Name:      | F1065 S102505 Gefitinib | Acquired By:        | System        |
| Sample Type:      | Unknown                 |                     |               |
| Vial:             | 1                       | Acq. Method Set:    | 2487          |
| Injection #:      | 14                      | Processing Method:  | 254           |
| Injection Volume: | 20.00 ul                | Channel Name:       | 2487Channel 1 |
| Run Time:         | 30.0 Minutes            | Proc. Chnl. Descr.: | 254           |
| Sample Set Name:  |                         |                     |               |

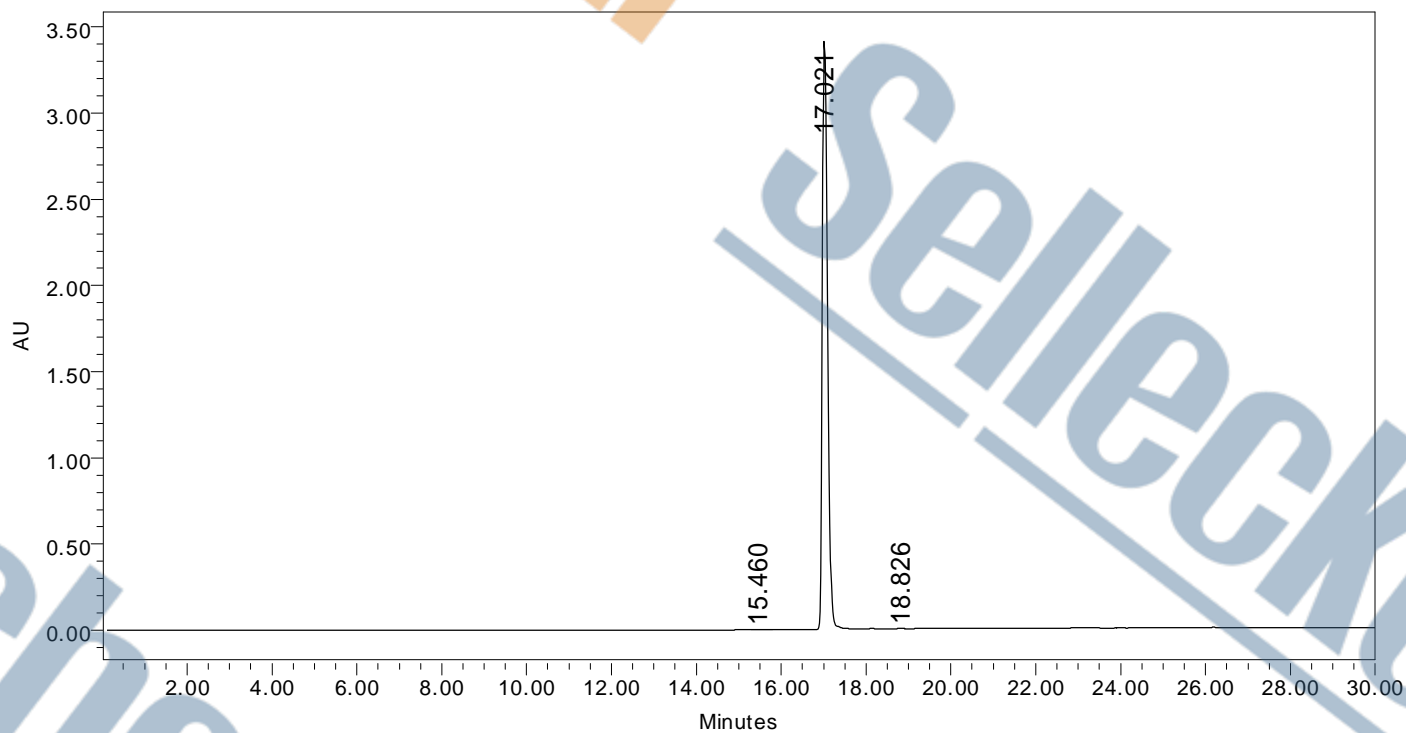

|   | RT     | Area     | % Area | Height  |
|---|--------|----------|--------|---------|
| 1 | 15.460 | 33730    | 0.11   | 2028    |
| 2 | 17.021 | 29290095 | 99.85  | 3429394 |
| 3 | 18.826 | 10337    | 0.04   | 1515    |

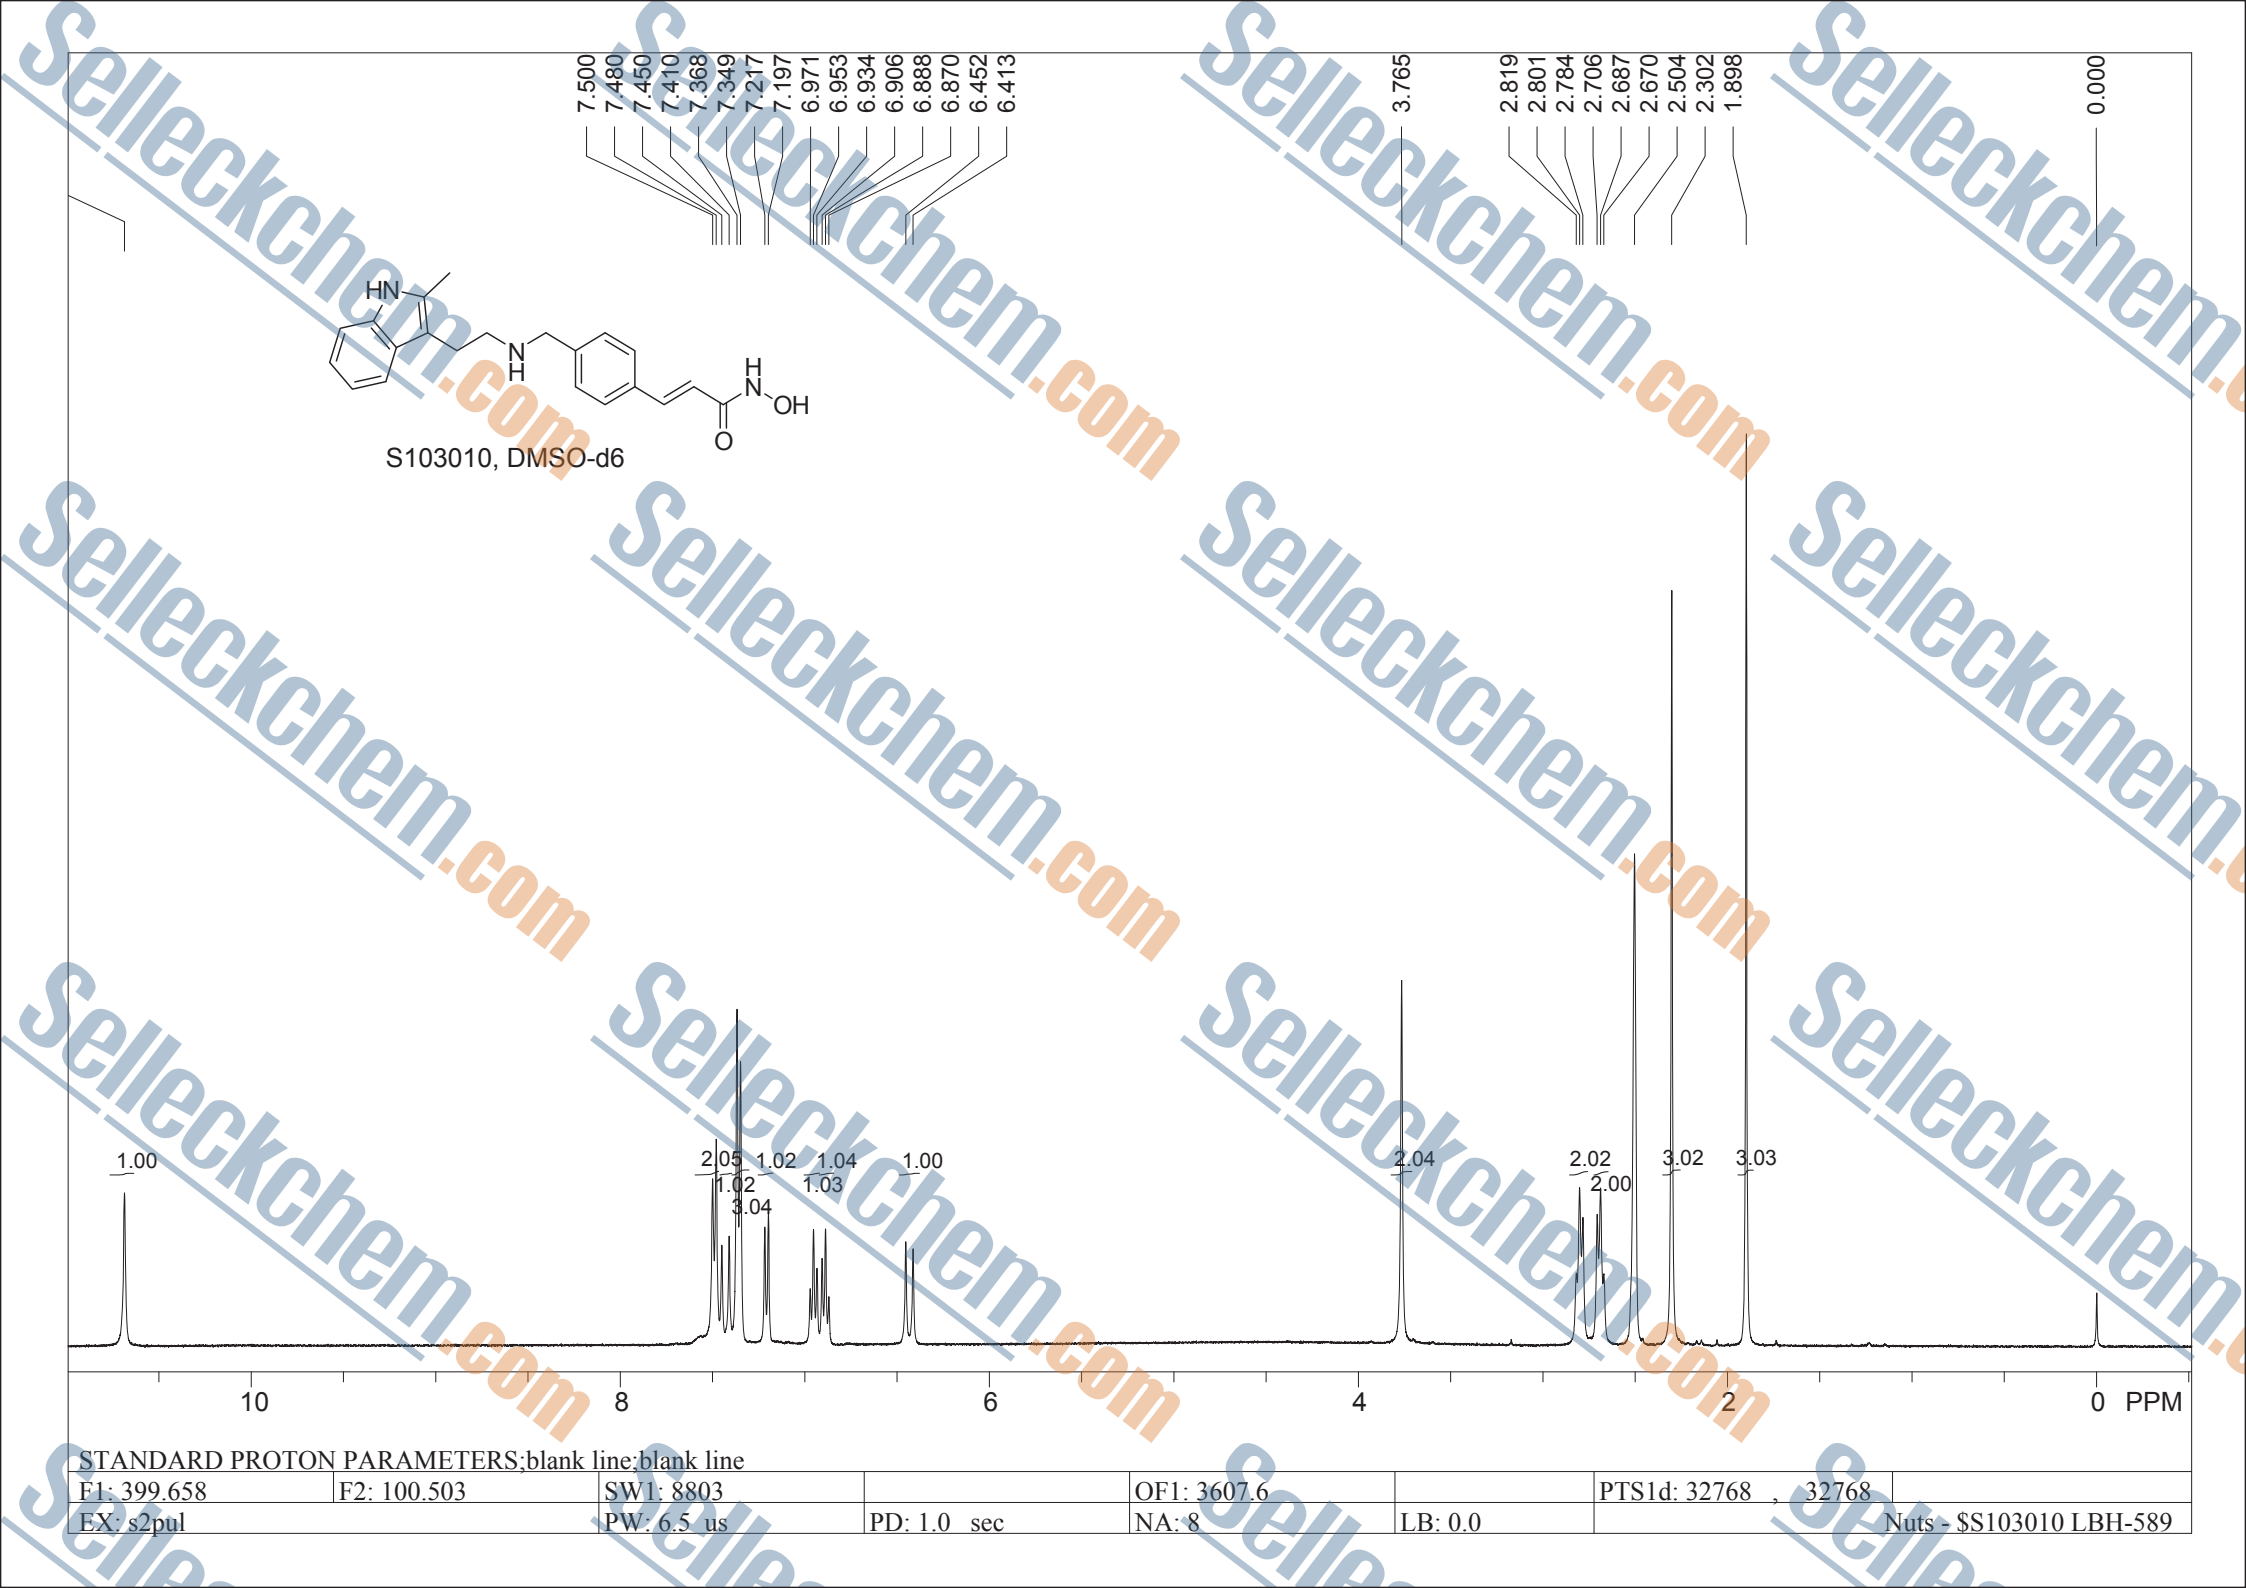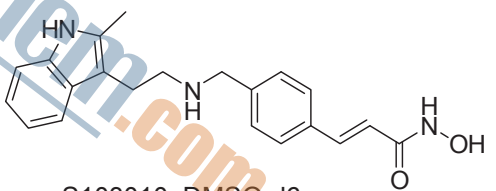

7.500  
7.480  
7.450  
7.410  
7.368  
7.349  
7.217  
7.197  
6.971  
6.953  
6.934  
6.906  
6.888  
6.870  
6.452  
6.413

3.765  
2.819  
2.801  
2.784  
2.706  
2.687  
2.670  
2.504  
2.302  
1.898  
0.000

1.00  
2.05  
1.02  
1.04  
1.00  
2.04  
2.02  
2.00  
3.02  
3.03

10 8 6 4 2 0 PPM

|                                                  |             |           |             |             |       |                      |                         |
|--------------------------------------------------|-------------|-----------|-------------|-------------|-------|----------------------|-------------------------|
| STANDARD PROTON PARAMETERS:blank line:blank line |             |           |             |             |       | PTS1d: 32768 , 32768 |                         |
| F1: 399.658                                      | F2: 100.503 | SW1: 8803 | PD: 1.0 sec | OF1: 3607.6 | NA: 8 | LB: 0.0              | Nuts - SS103010 LBH-589 |
| EX: s2pul                                        | PW: 6.5 us  |           |             |             |       |                      |                         |



---

\*\*\* End of Report \*\*\*



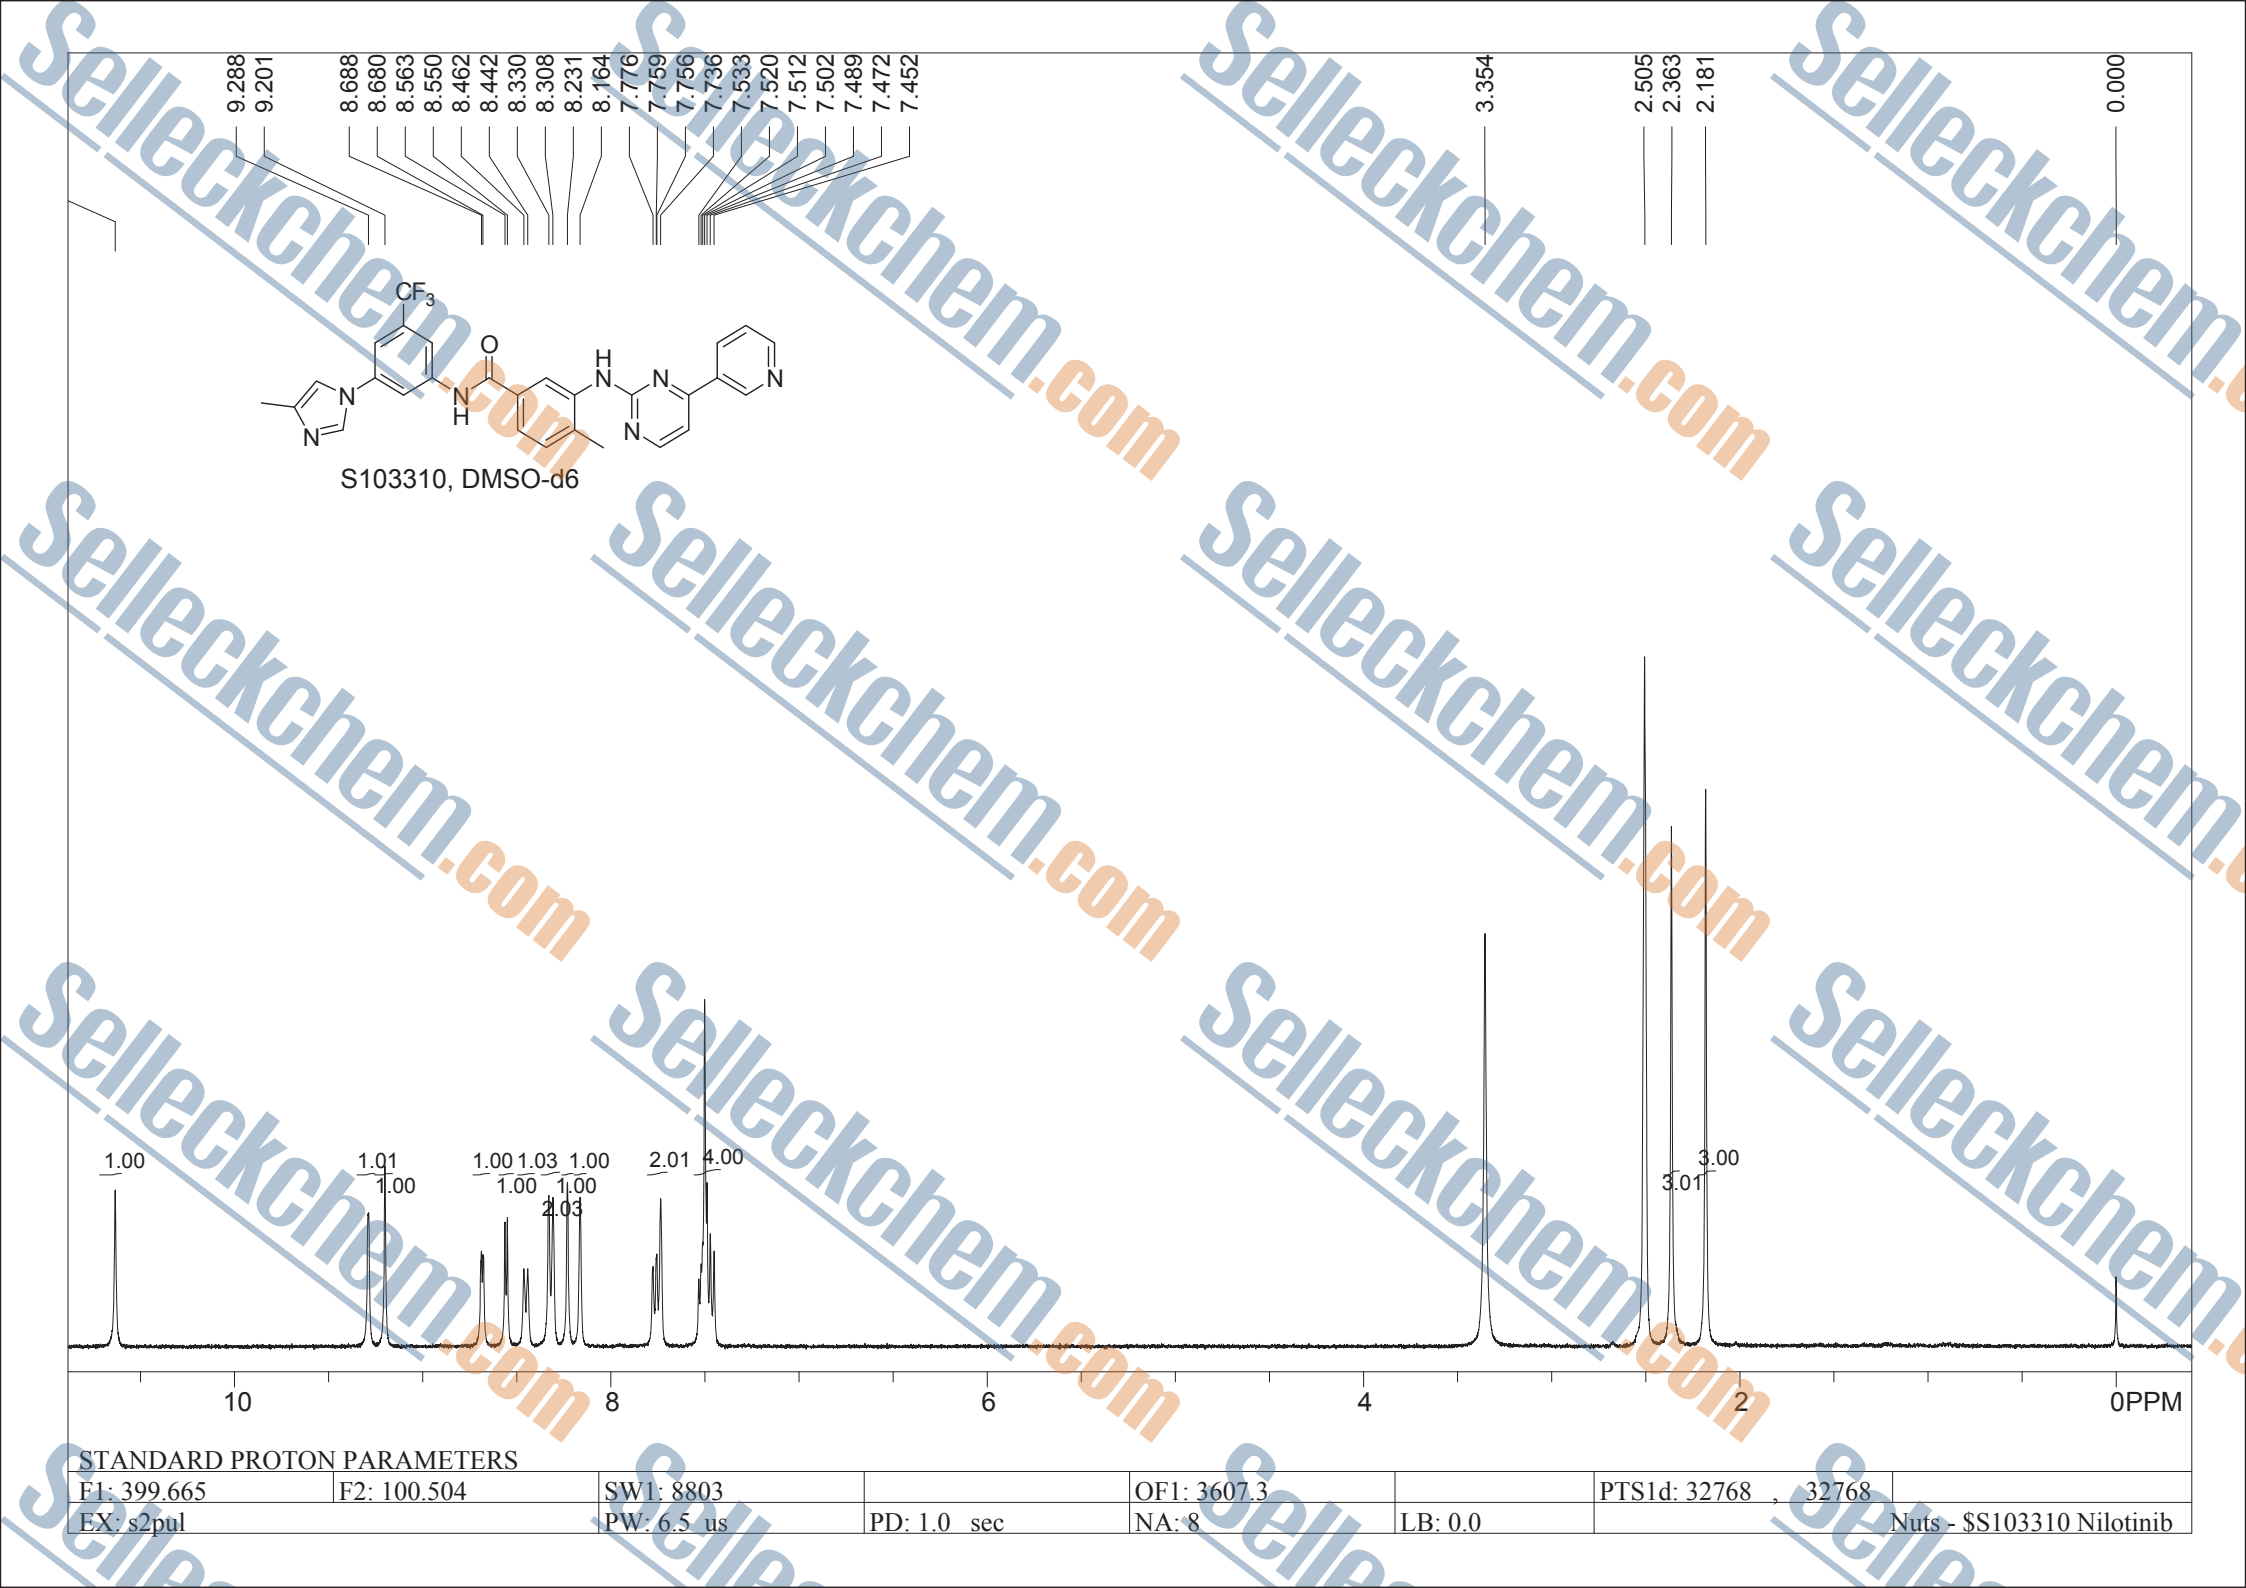

STANDARD PROTON PARAMETERS

|             |             |             |             |                      |
|-------------|-------------|-------------|-------------|----------------------|
| F1: 399.665 | F2: 100.504 | SW1: 8803   | OF1: 3607.3 | PTS1d: 32768 , 32768 |
| EX: s2pul   | PW: 6.5 us  | PD: 1.0 sec | NA: 8       | LB: 0.0              |

Nuts - S103310 Nilotinib

=====

|                                         |                              |
|-----------------------------------------|------------------------------|
| Acq. Operator : SYSTEM                  | Seq. Line : 8                |
| Acq. Instrument : 12601c                | Location : Vial 28           |
|                                         | Inj Volume : 5.000 µl        |
| Different Inj Volume from Sample Entry! | Actual Inj Volume : 0.600 µl |

Additional Info : Peak(s) manually integrated

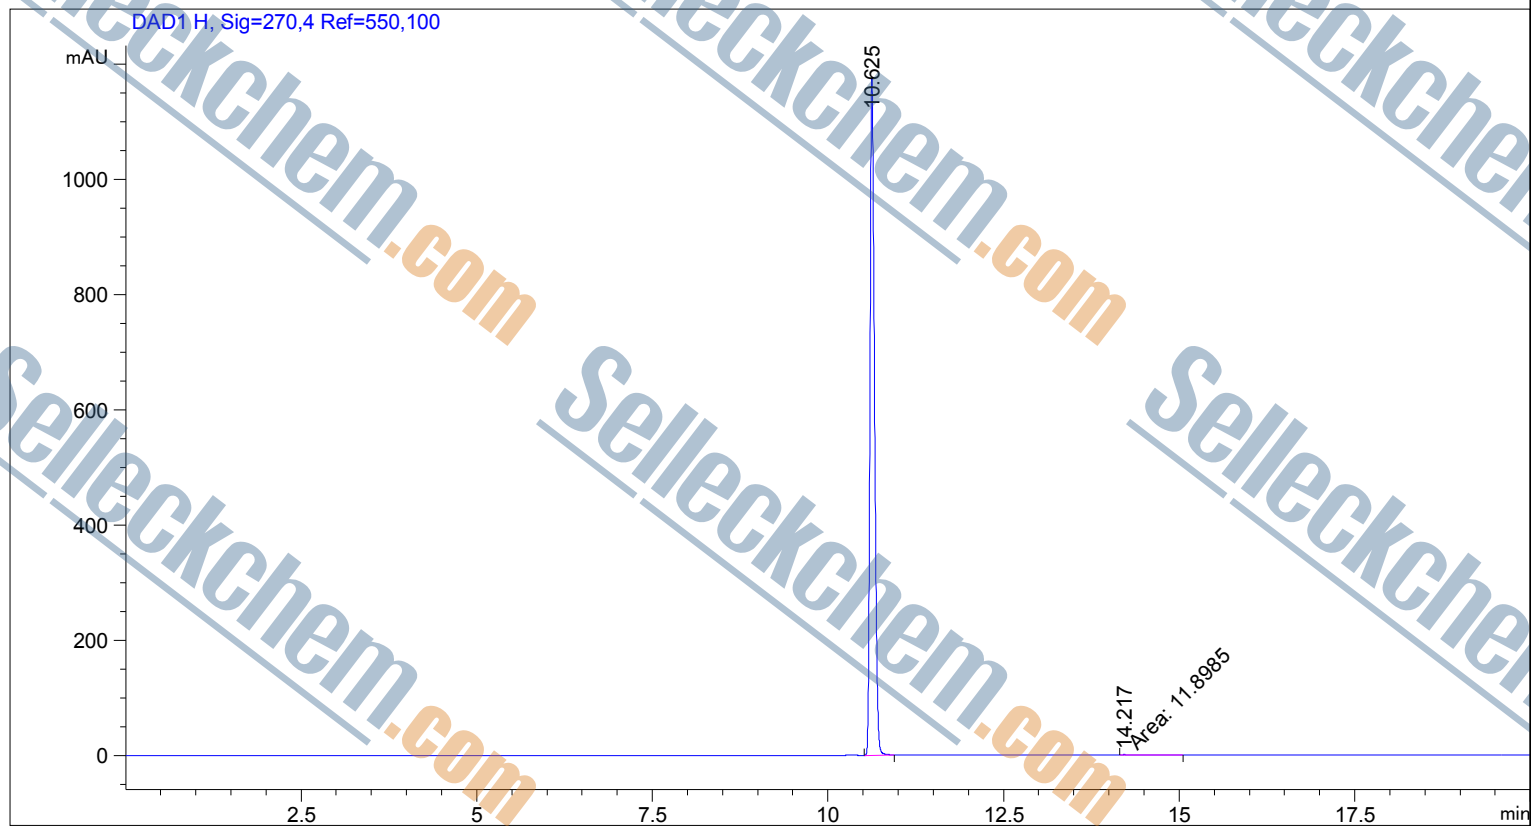

=====  
Area Percent Report  
=====

Sorted By : Signal  
Multiplier : 1.0000  
Dilution : 1.0000  
Use Multiplier & Dilution Factor with ISTDs

Signal 1: DAD1 H, Sig=270,4 Ref=550,100

| Peak # | RetTime [min] | Type | Width [min] | Area [mAU*s] | Height [mAU] | Area %  |
|--------|---------------|------|-------------|--------------|--------------|---------|
| 1      | 10.625        | BB   | 0.0686      | 5245.72949   | 1174.07544   | 99.7737 |
| 2      | 14.217        | MM   | 0.1954      | 11.89854     | 1.01506      | 0.2263  |

Totals : 5257.62803 1175.09050

=====  
\*\*\* End of Report \*\*\*

```

=====
Acq. Operator   : SYSTEM                      Seq. Line :    1
Acq. Instrument : 12601c                     Location  : Vial 84

                                           Inj Volume : 2.000 µl
Different Inj Volume from Sample Entry! Actual Inj Volume : 1.200 µl
    
```

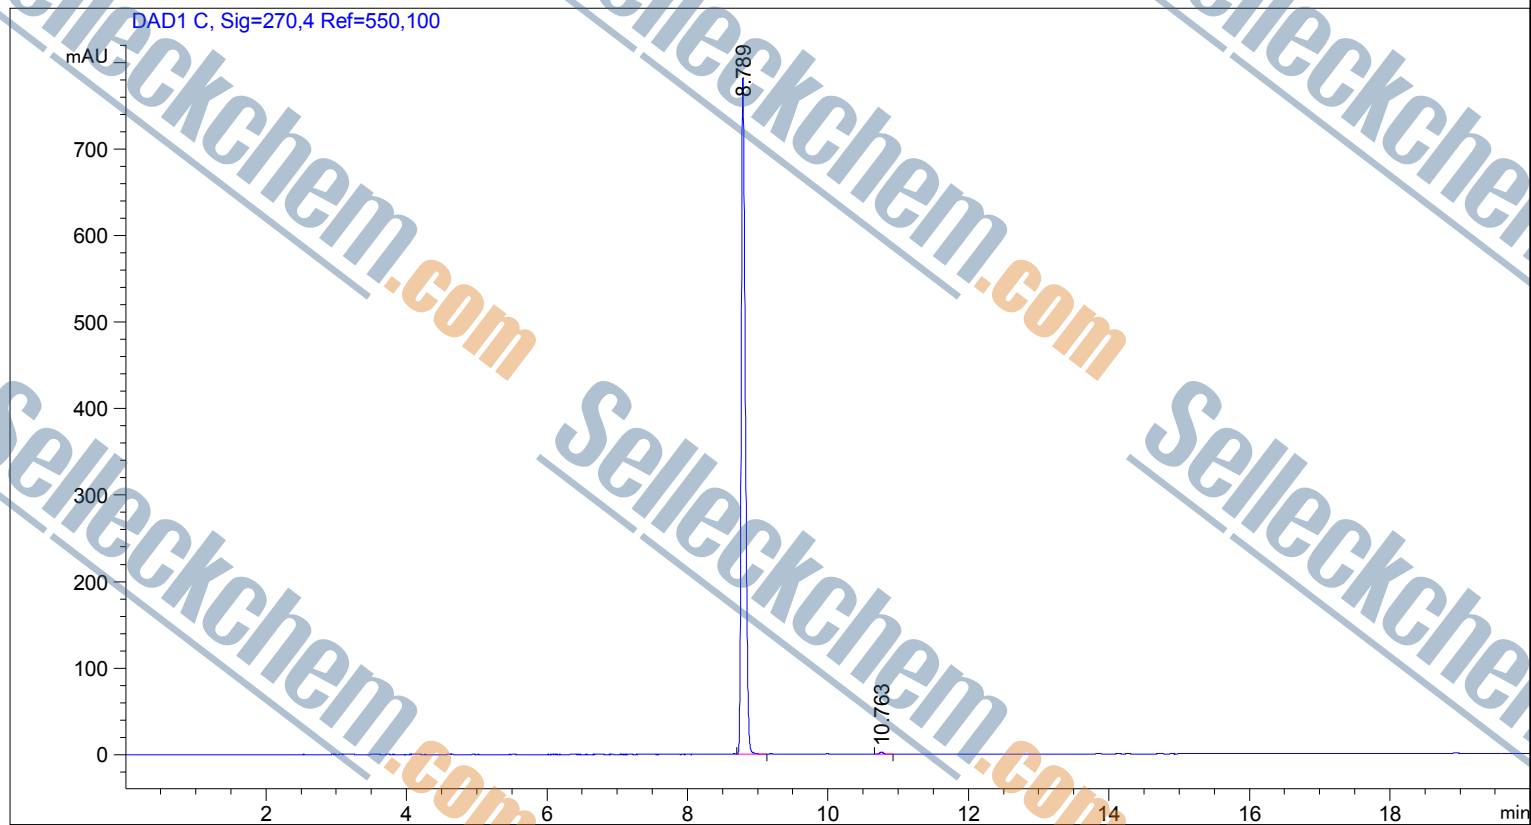

Area Percent Report

```

Sorted By      : Signal
Multiplier     : 1.0000
Dilution       : 1.0000
Use Multiplier & Dilution Factor with ISTDs
    
```

Signal 1: DAD1 C, Sig=270,4 Ref=550,100

| Peak #   | RetTime [min] | Type | Width [min] | Area [mAU*s] | Height [mAU] | Area %  |
|----------|---------------|------|-------------|--------------|--------------|---------|
| 1        | 8.789         | VB   | 0.0607      | 3095.89844   | 782.03766    | 99.6617 |
| 2        | 10.763        | BB   | 0.0613      | 10.50892     | 2.64832      | 0.3383  |
| Totals : |               |      |             | 3106.40736   | 784.68598    |         |

\*\*\* End of Report \*\*\*

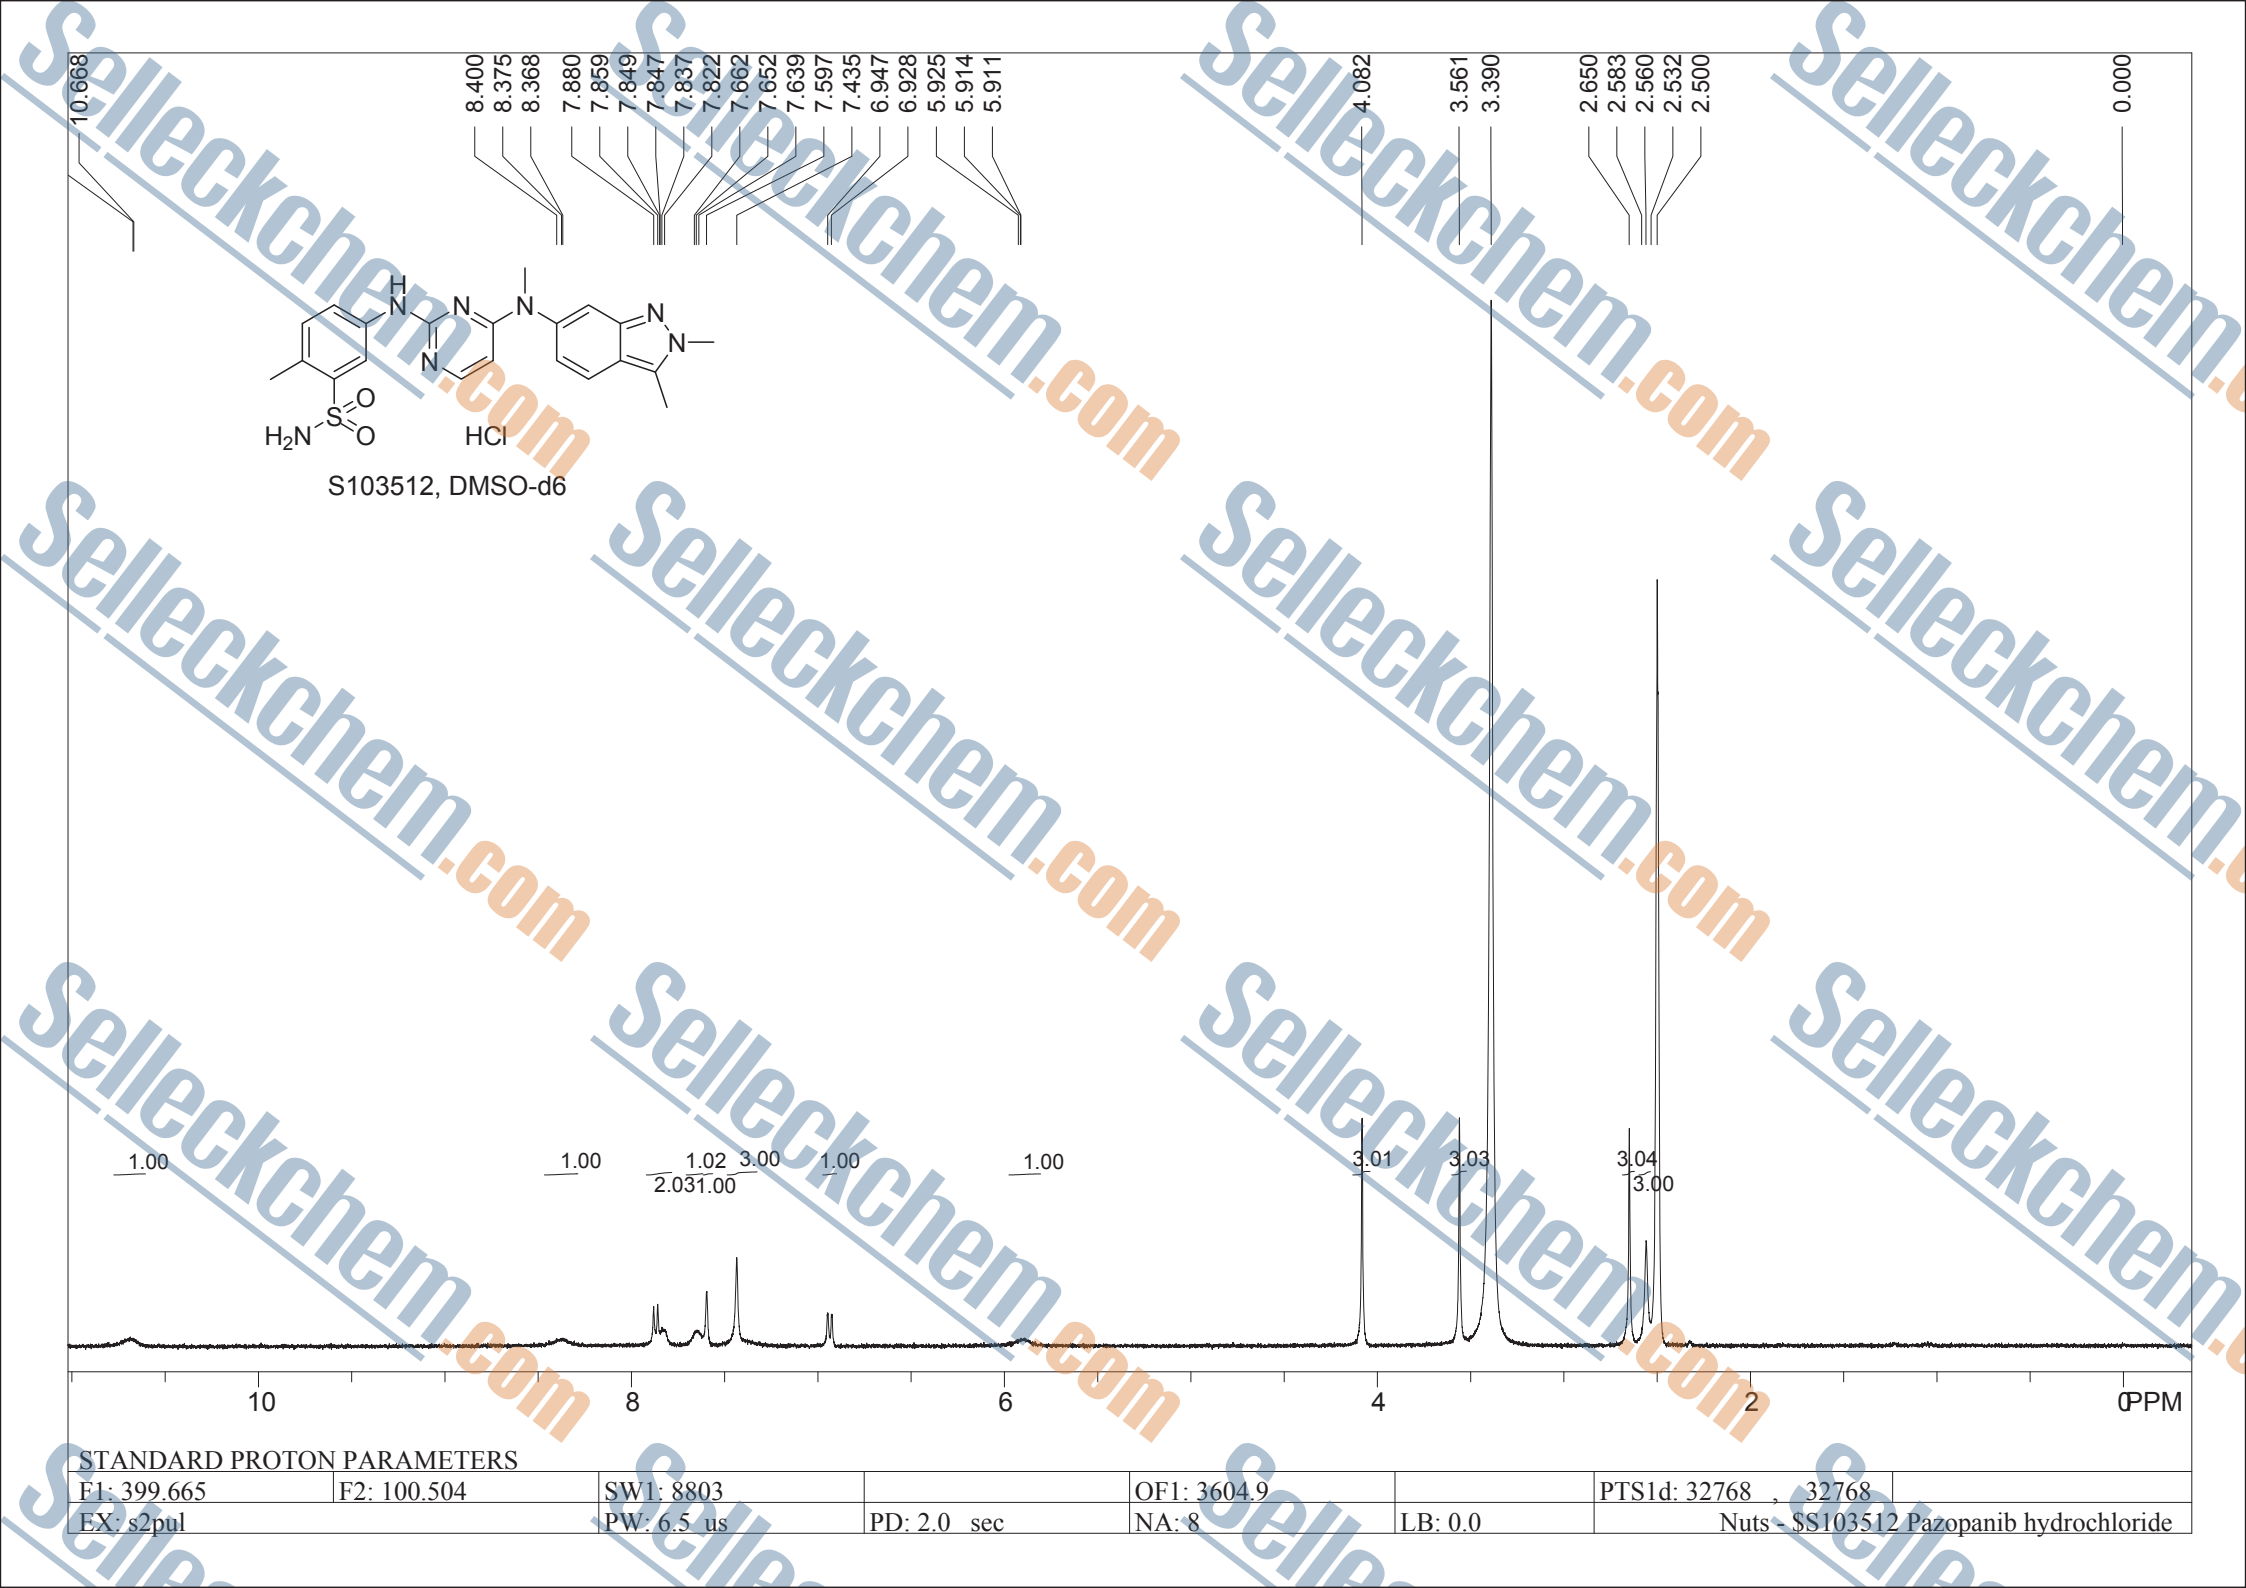

STANDARD PROTON PARAMETERS

|                                         |             |             |             |                      |
|-----------------------------------------|-------------|-------------|-------------|----------------------|
| F1: 399.665                             | F2: 100.504 | SW1: 8803   | OF1: 3604.9 | PTS1d: 32768 , 32768 |
| EX: s2pul                               | PW: 6.5 us  | PD: 2.0 sec | NA: 8       | LB: 0.0              |
| Nuts - SS103512 Pazopanib hydrochloride |             |             |             |                      |

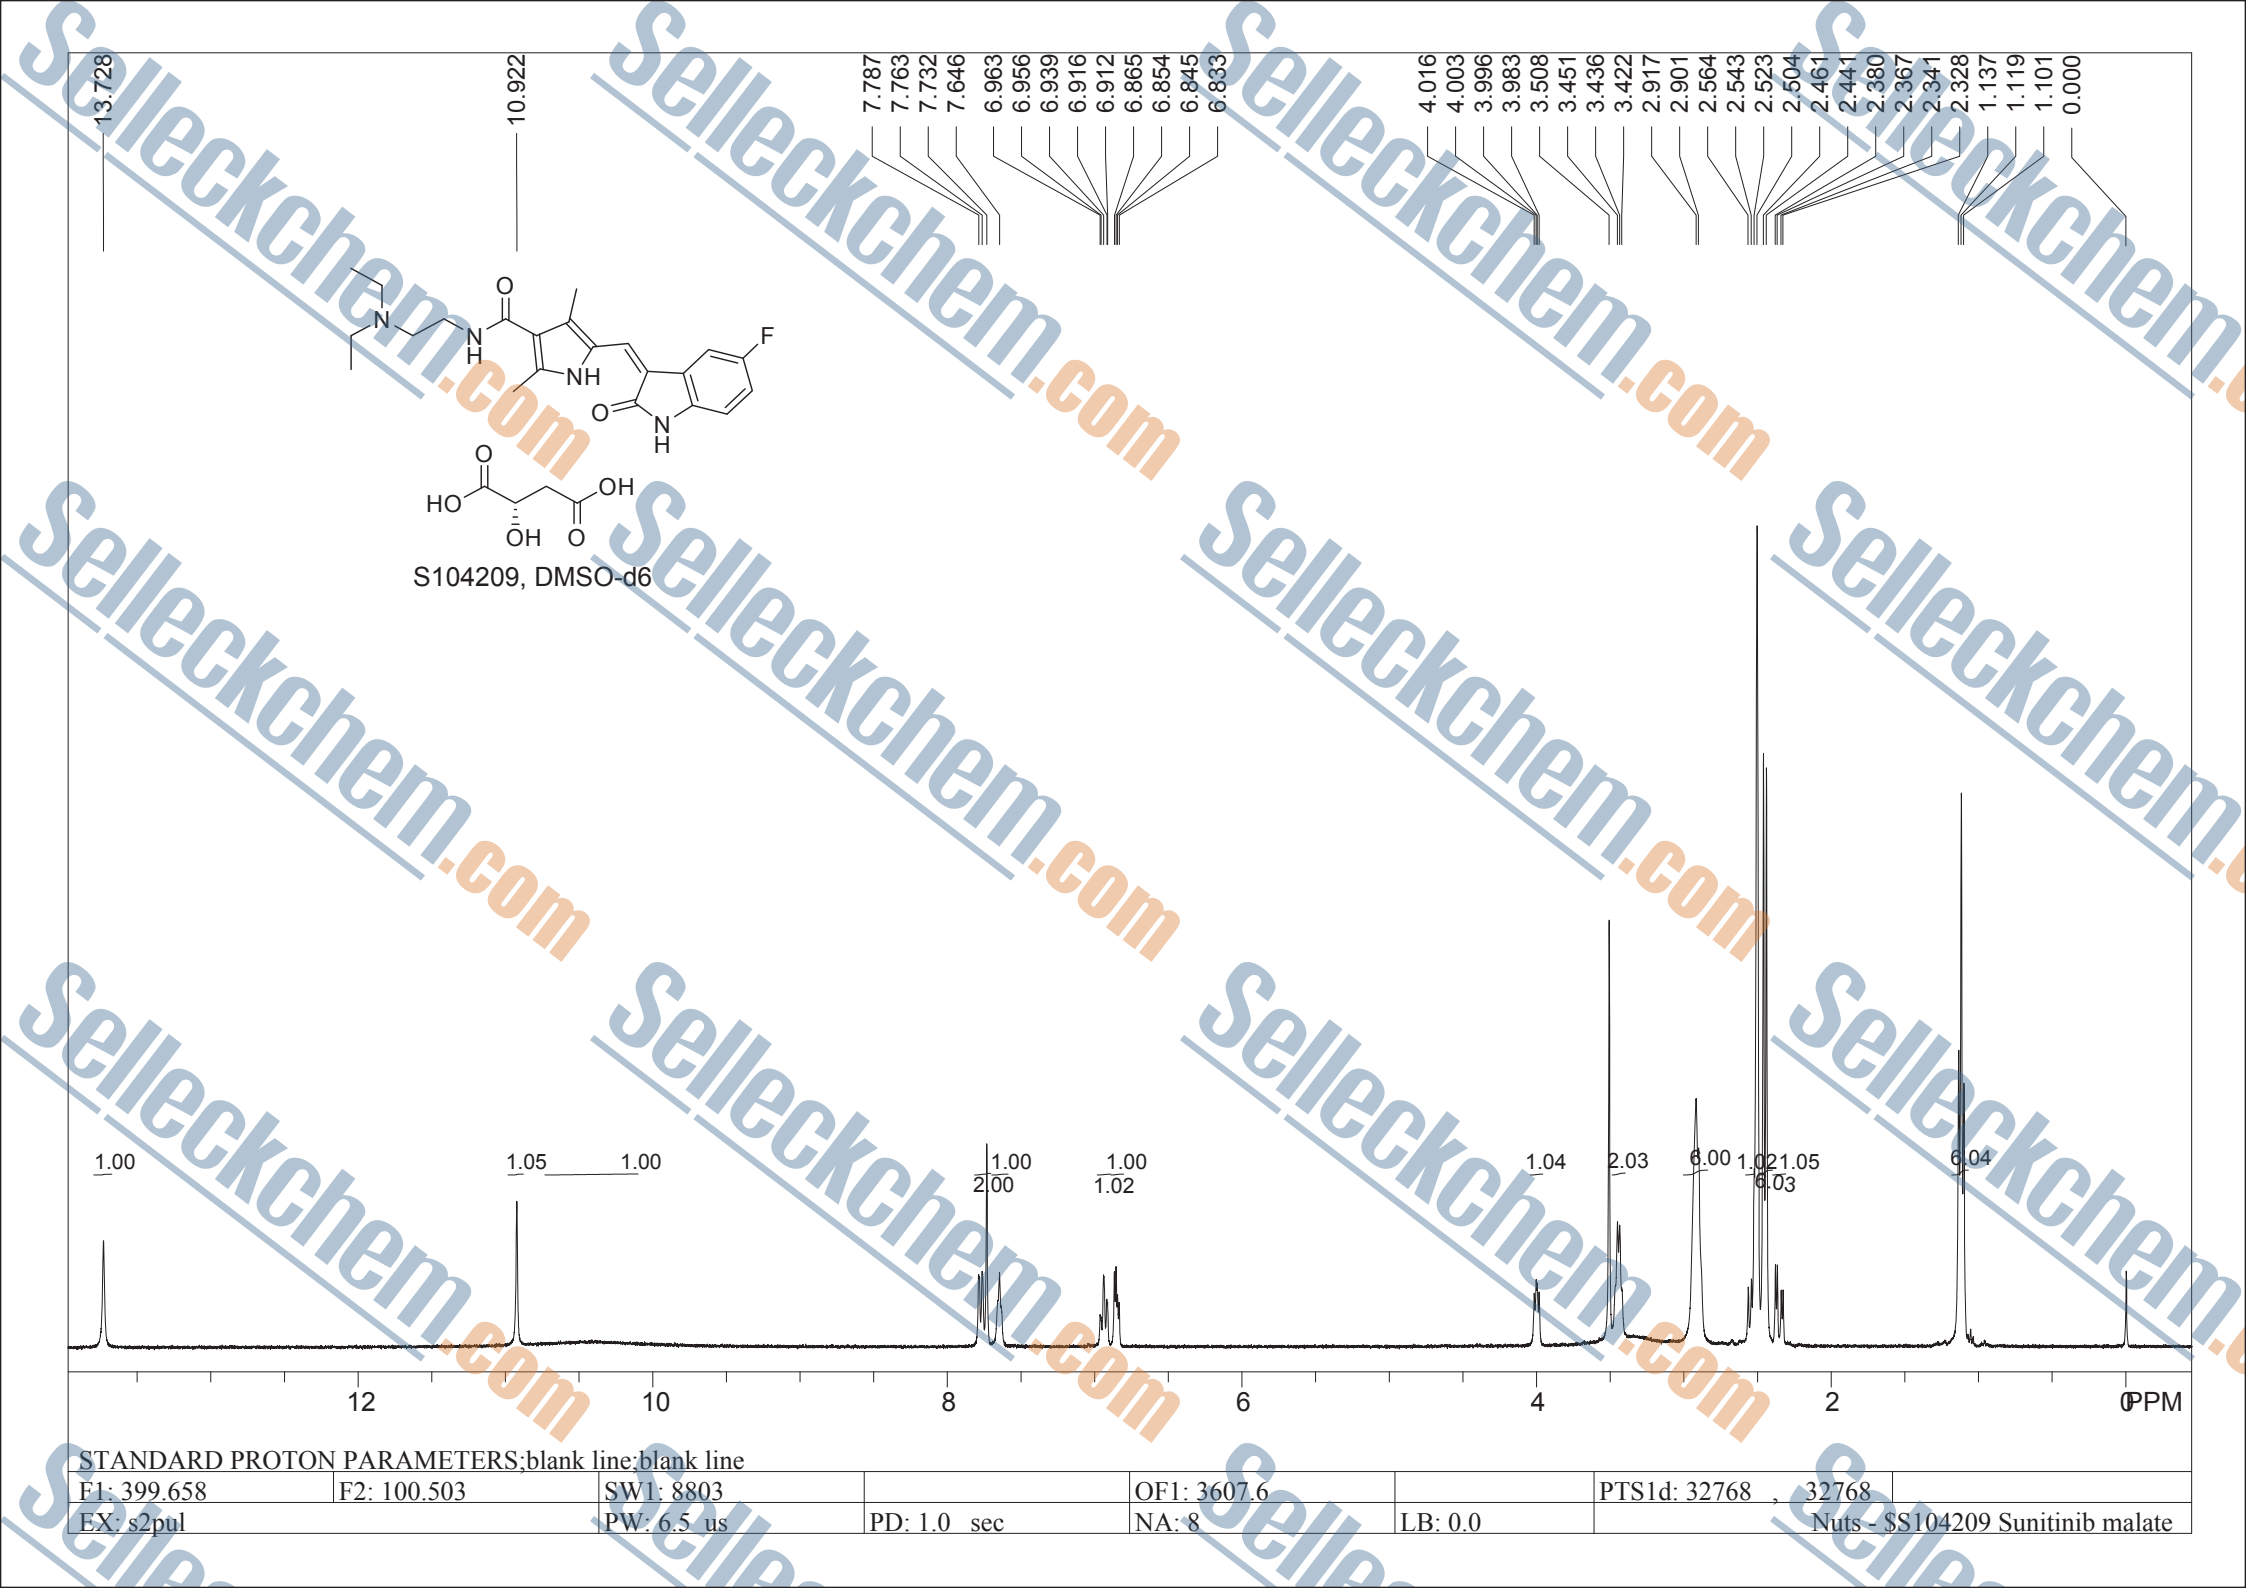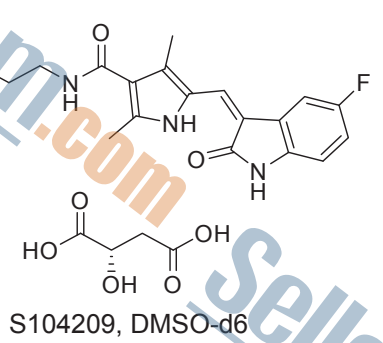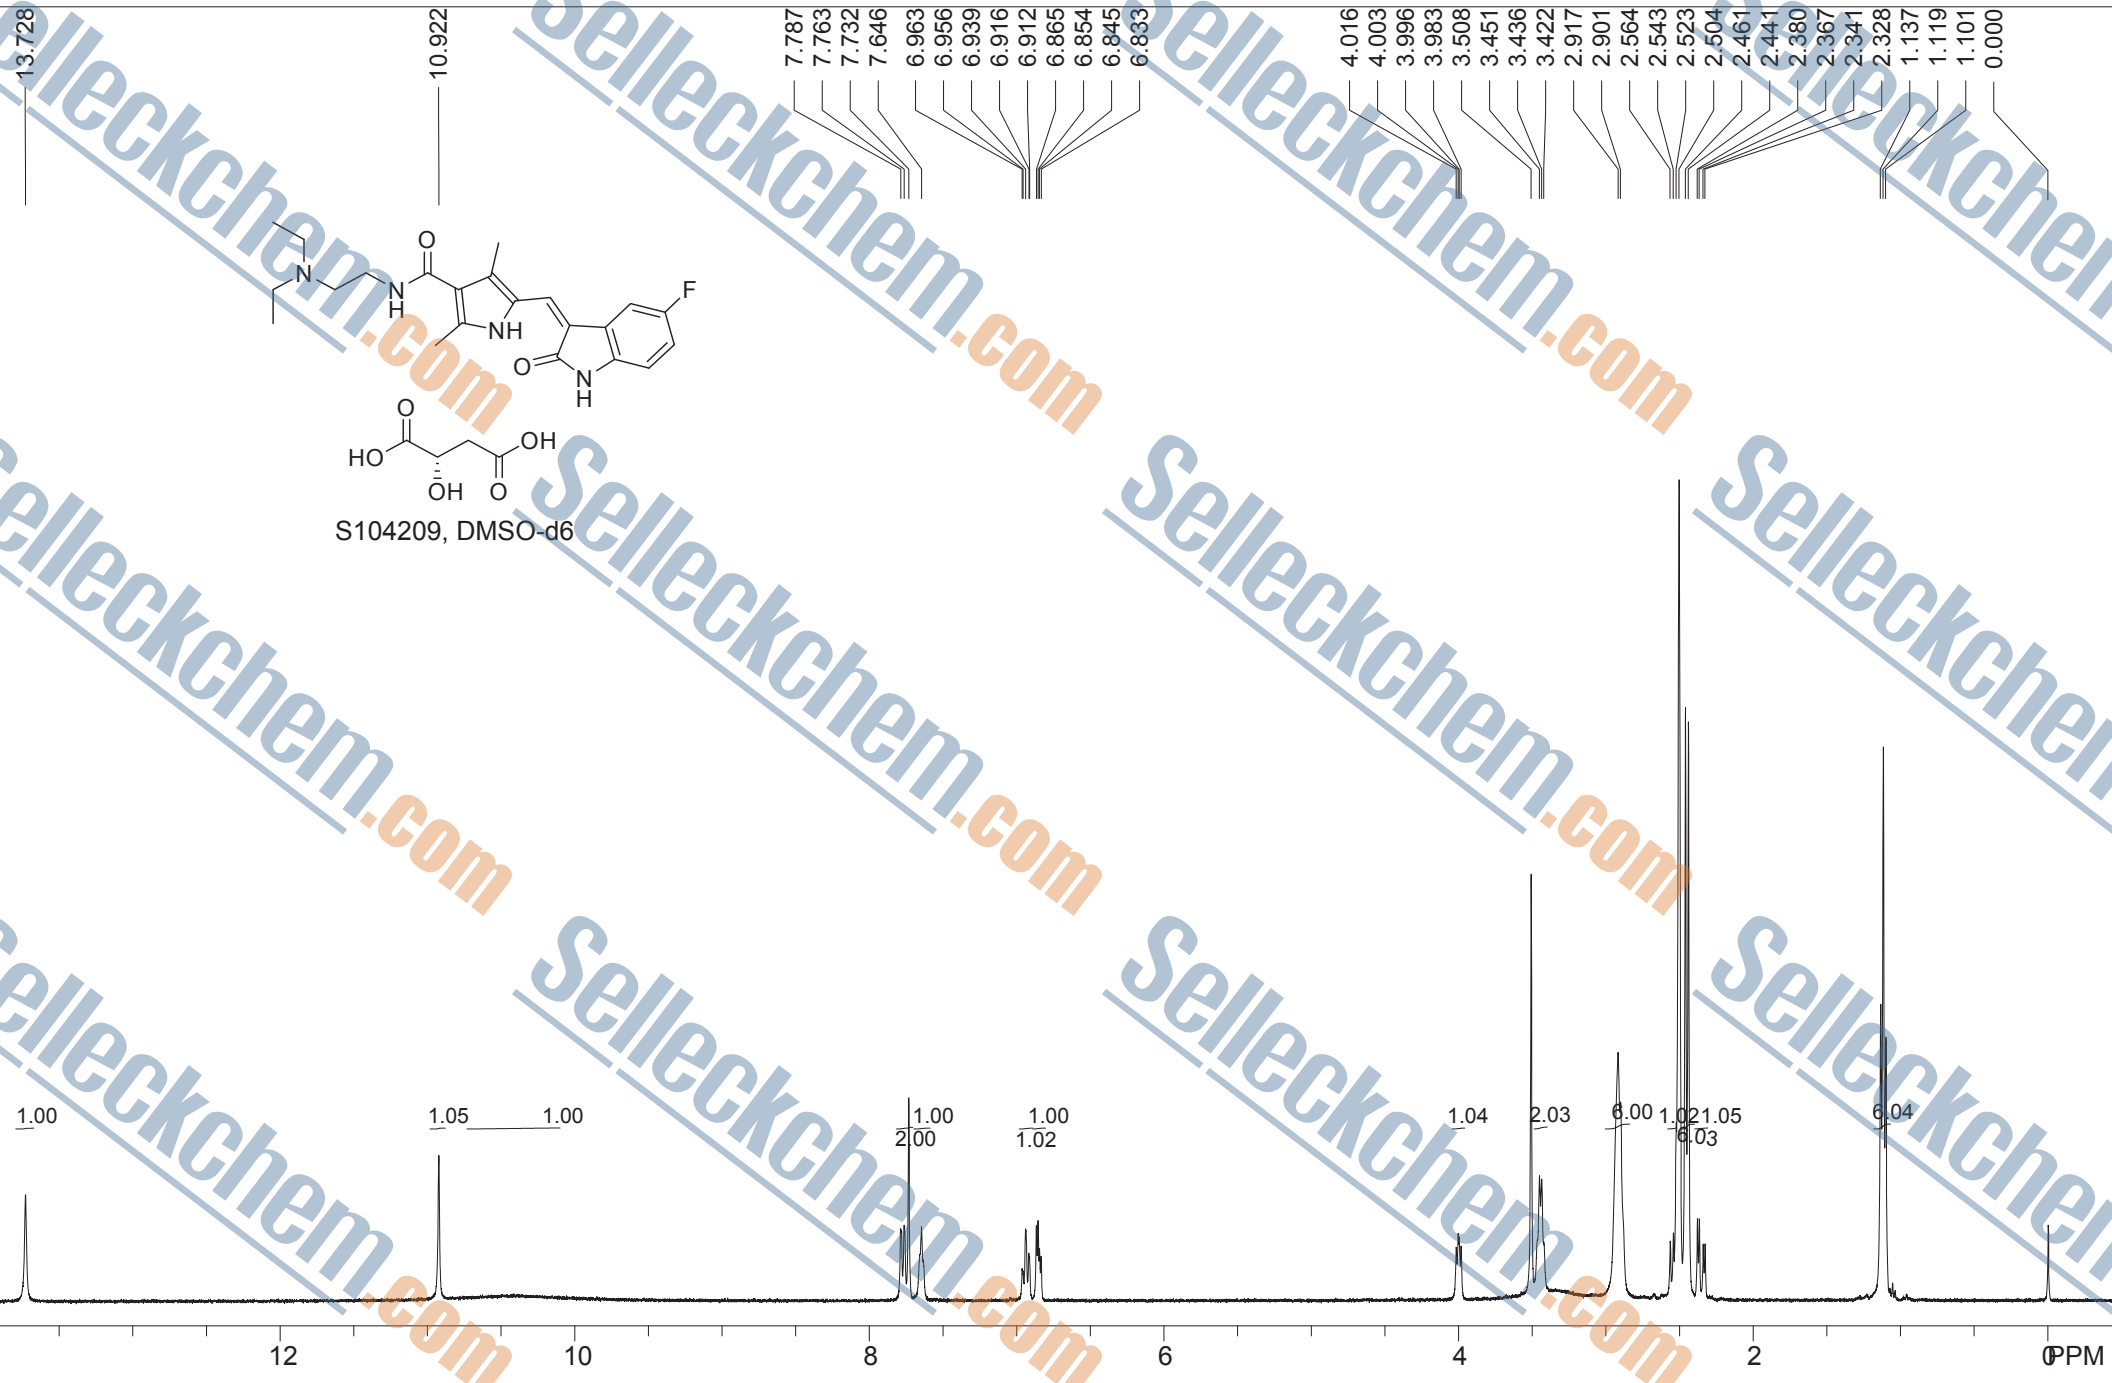

STANDARD PROTON PARAMETERS:blank line:blank line

|             |             |             |             |                                 |
|-------------|-------------|-------------|-------------|---------------------------------|
| F1: 399.658 | F2: 100.503 | SW1: 8803   | OF1: 3607.6 | PTS1d: 32768 , 32768            |
| EX: s2pul   | PW: 6.5 us  | PD: 1.0 sec | NA: 8       | LB: 0.0                         |
|             |             |             |             | Nuts - S104209 Sunitinib malate |

## SAMPLE INFORMATION

|                   |                                |                     |               |
|-------------------|--------------------------------|---------------------|---------------|
| Sample Name:      | F4837 S104209 Sunitinib malate | Acquired By:        | System        |
| Sample Type:      | Unknown                        | Acq. Method Set:    | YCR           |
| Vial:             | 1                              | Processing Method:  | 261           |
| Injection:        | 15                             | Channel Name:       | 2487Channel 1 |
| Injection Volume: | 20.00 ul                       | Proc. Chnl. Descr.: | 261           |
| Run Time:         | 30.0 Minutes                   |                     |               |
| Sample Set Name:  |                                |                     |               |

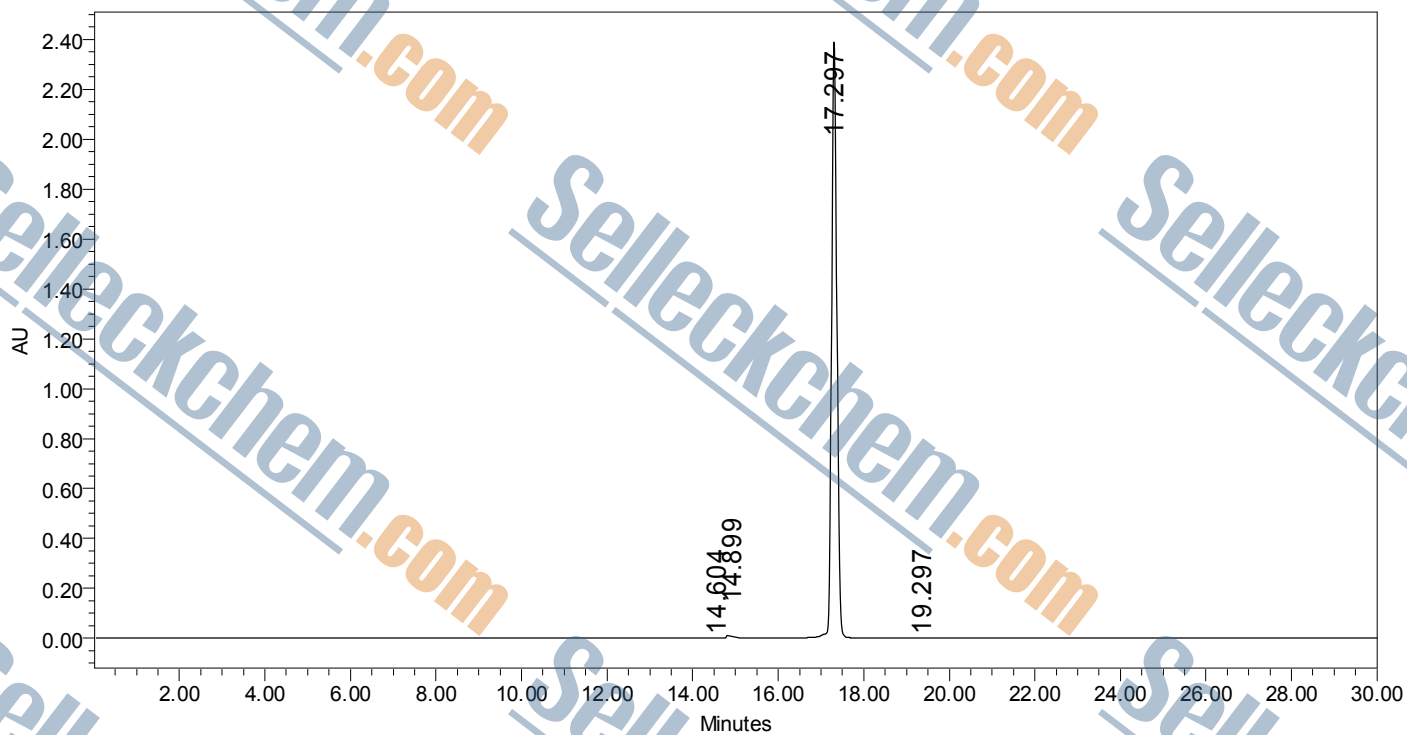

|   | RT     | Area    | % Area | Height  |
|---|--------|---------|--------|---------|
| 1 | 14.604 | 5550    | 0.12   | 757     |
| 2 | 14.899 | 33330   | 0.72   | 167399  |
| 3 | 17.297 | 4584327 | 99.03  | 2411586 |
| 4 | 19.297 | 6018    | 0.13   | 914     |

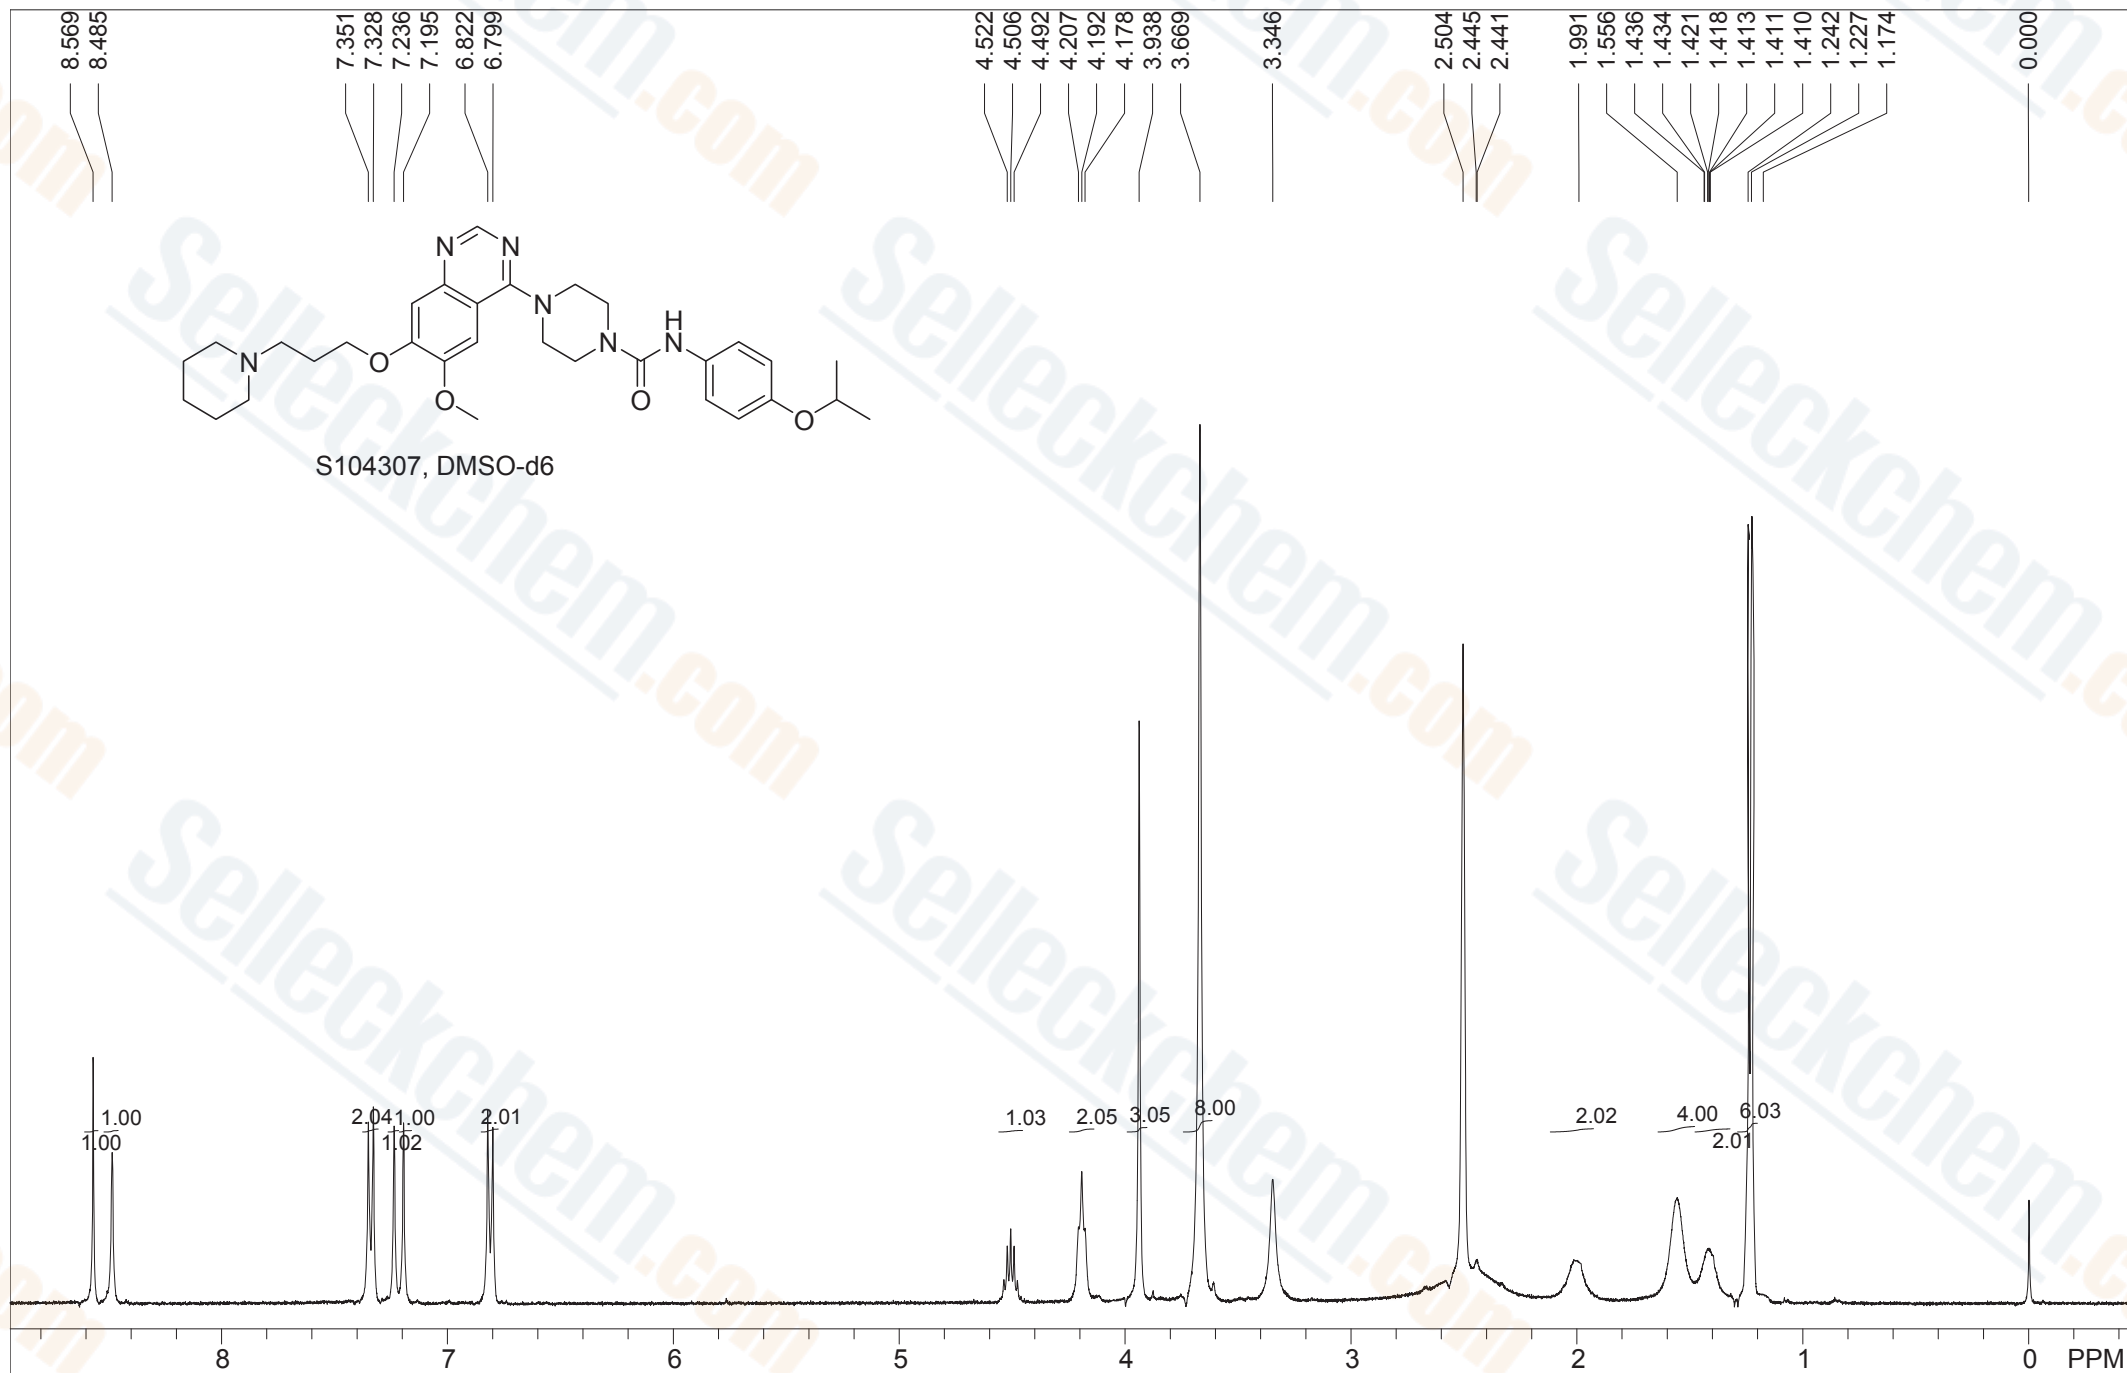

STANDARD PROTON PARAMETERS

|             |             |             |             |                      |
|-------------|-------------|-------------|-------------|----------------------|
| F1: 399.658 | F2: 100.503 | SW1: 8803   | OF1: 3608.1 | PTS1d: 32768 , 32768 |
| EX: s2pul   | PW: 6.5 us  | PD: 1.0 sec | NA: 8       | LB: 0.0              |

Nuts - S104307 Tandutinib

# SAMPLE INFORMATION

Sample Name: F4559 S104307 Tandutinib  
Sample Type:  
Vial: 1  
Injection #: 4  
Injection Volume: 20.00 ul  
Run Time: 30.0 Minutes  
Sample Set Name:

Acquire By: System  
Acq. Method Set: Z  
Processing Method: 254  
Channel Name:  
Proc. Chnl. Descr: 254

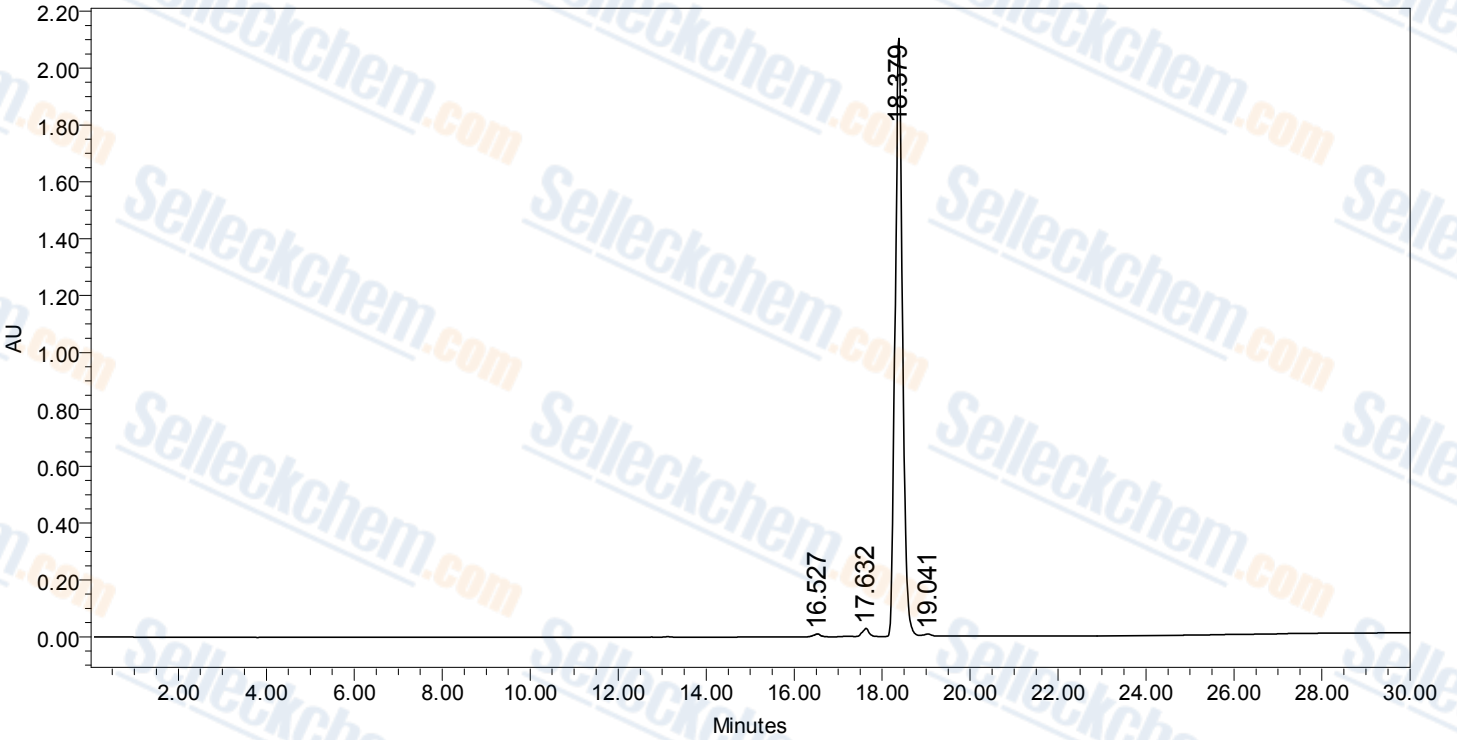

|   | RT     | Area     | Height  | % Area |
|---|--------|----------|---------|--------|
| 1 | 16.527 | 94373    | 9651    | 0.28   |
| 2 | 17.632 | 100970   | 17129   | 0.40   |
| 3 | 18.379 | 24526828 | 2105741 | 99.08  |
| 4 | 19.041 | 86048    | 7651    | 0.24   |



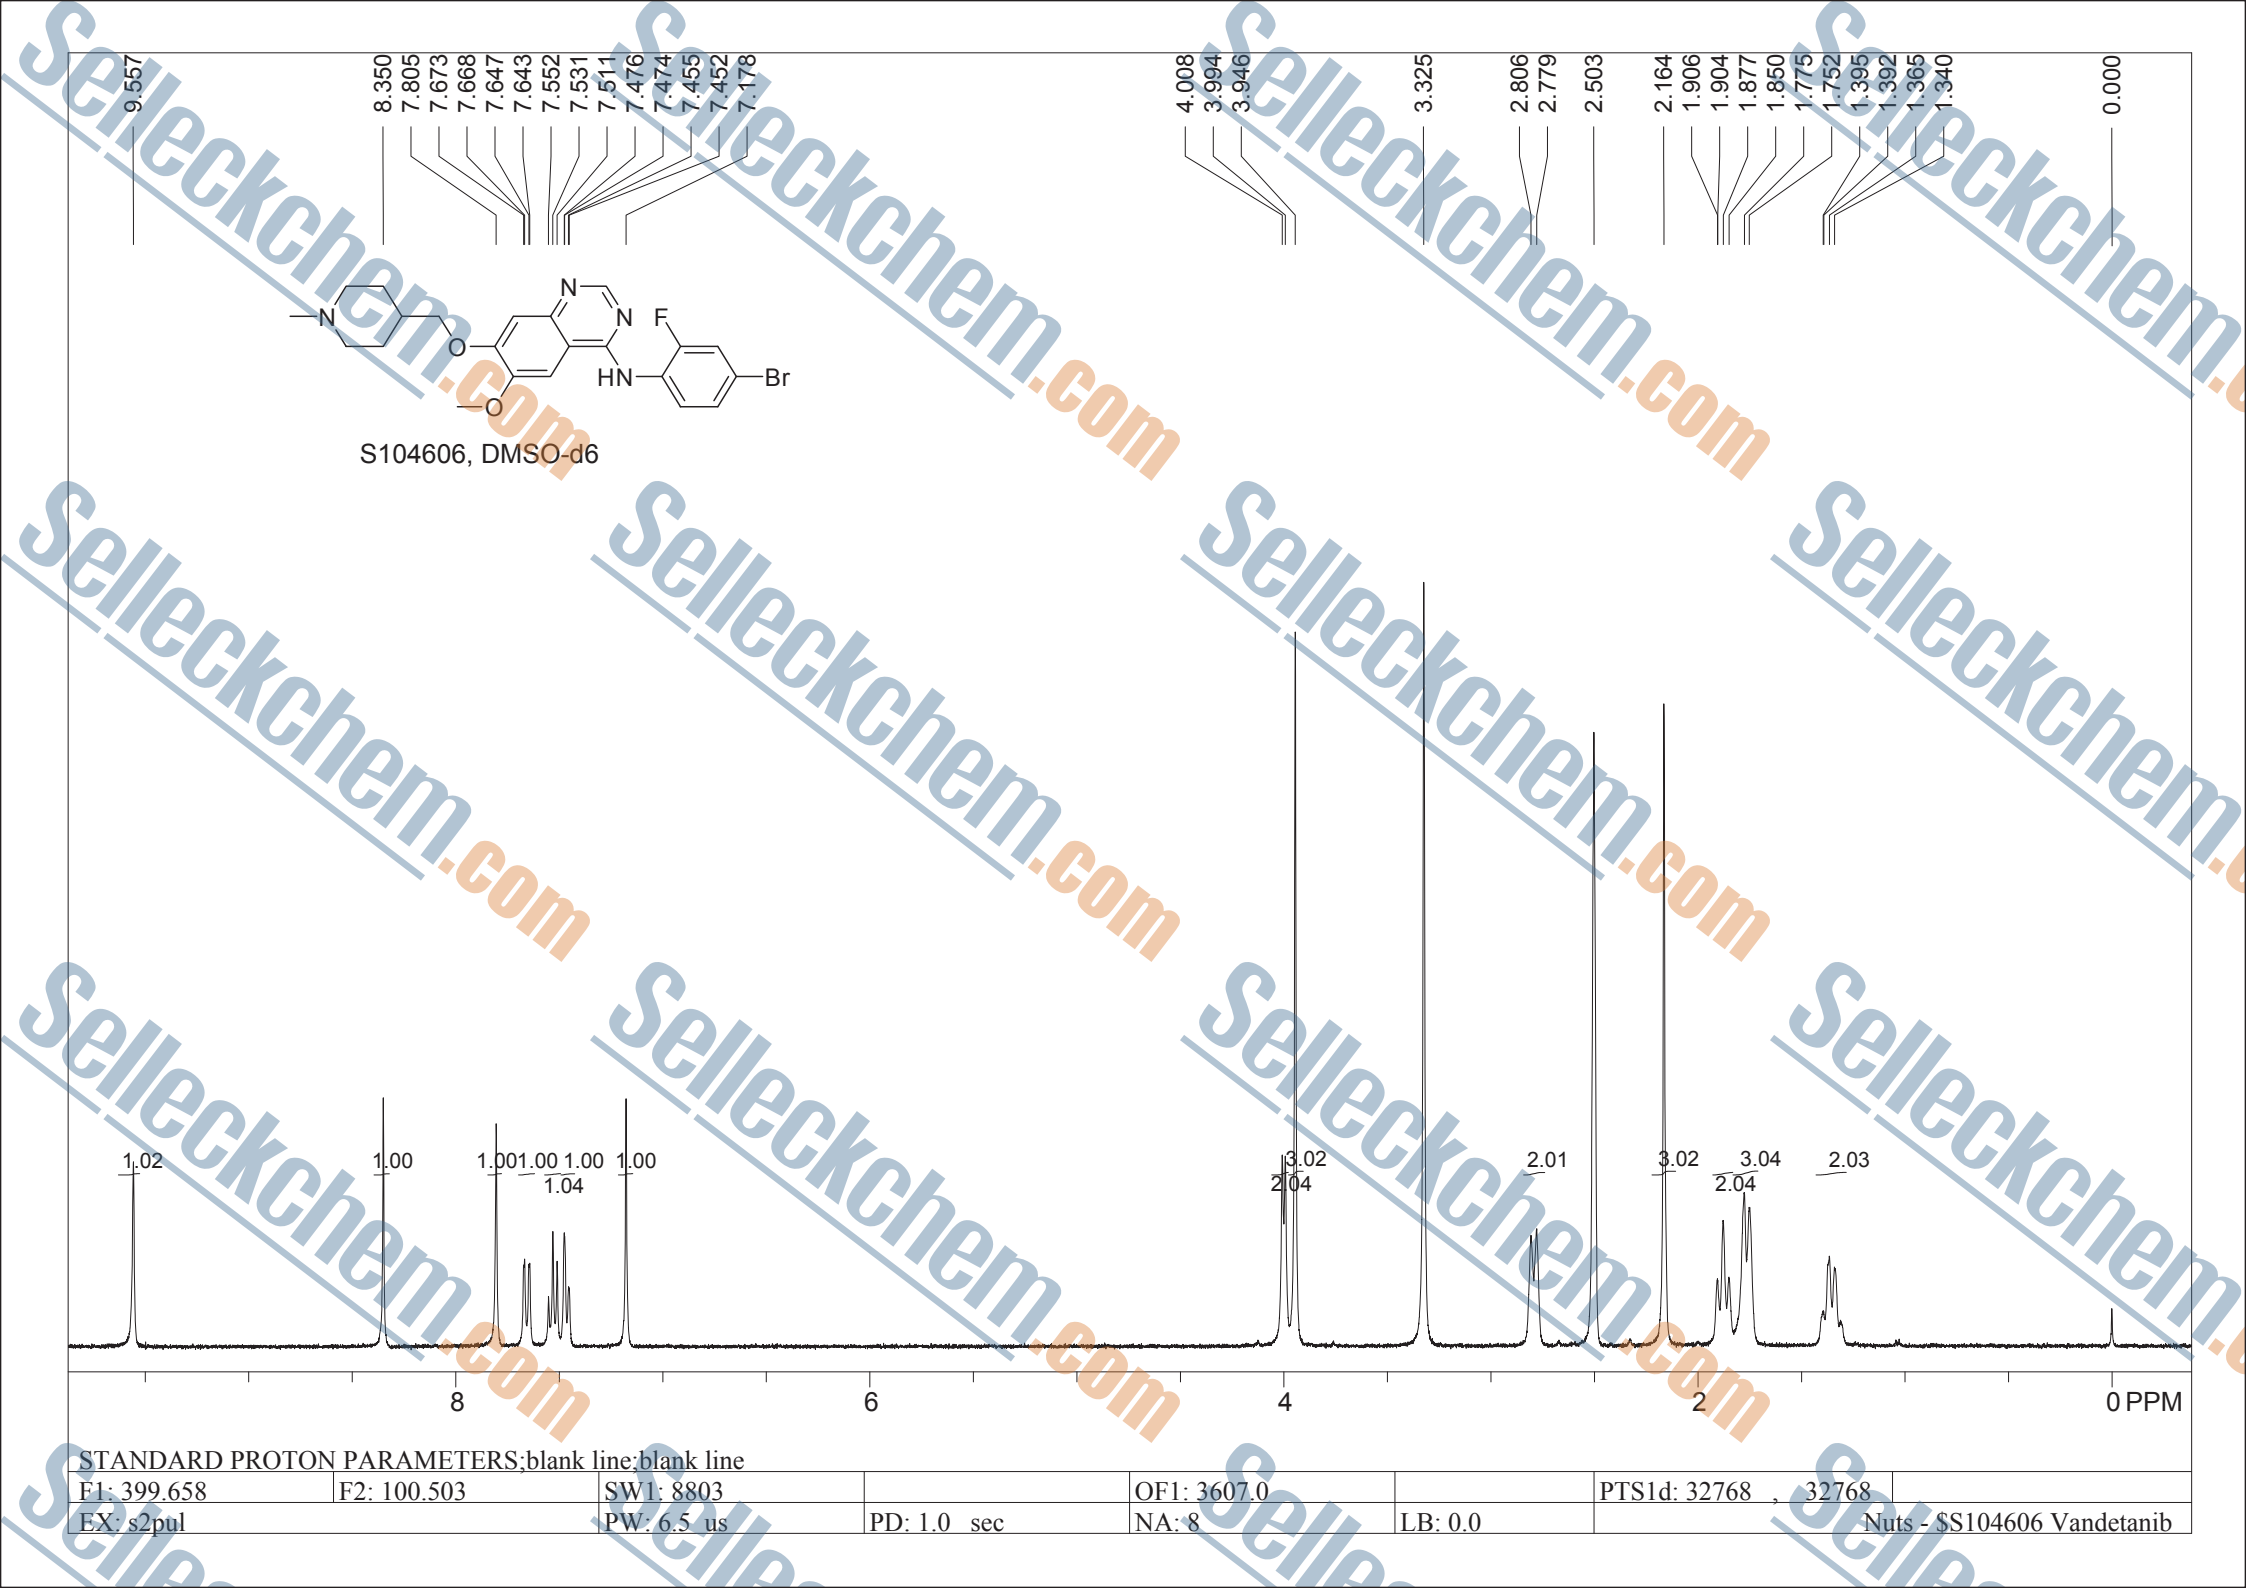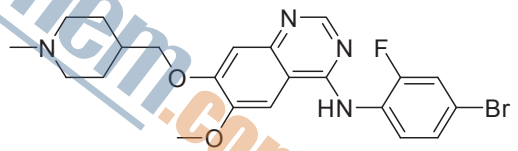

S104606, DMSO-d6

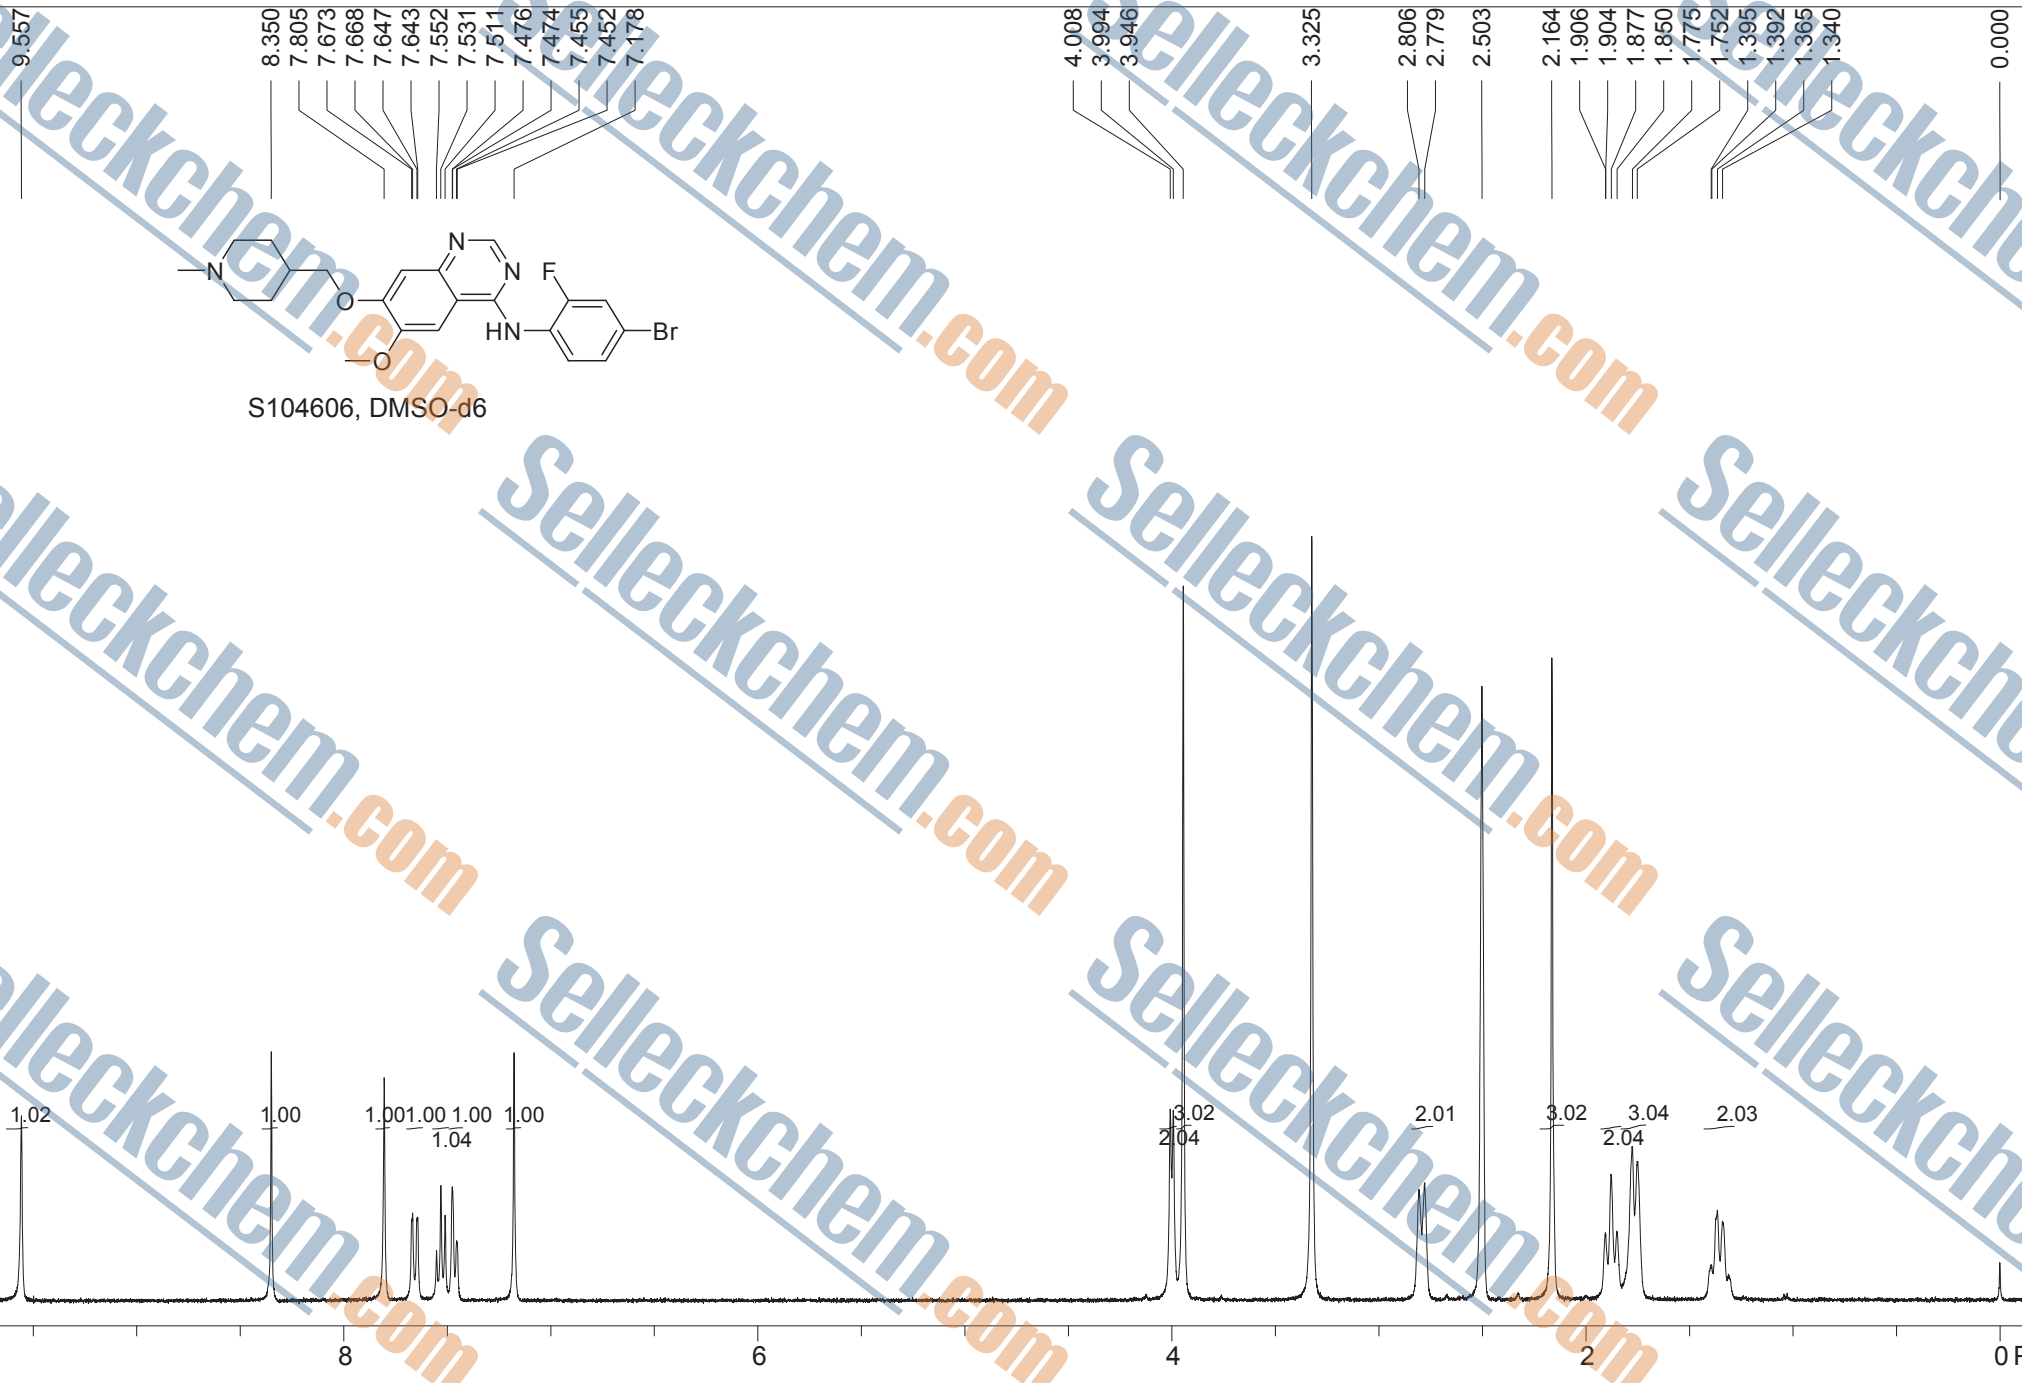

STANDARD PROTON PARAMETERS:blank line:blank line

|             |             |             |             |                             |
|-------------|-------------|-------------|-------------|-----------------------------|
| F1: 399.658 | F2: 100.503 | SW1: 8803   | OF1: 3607.0 | PTS1d: 32768 , 32768        |
| EX: s2pul   | PW: 6.5 us  | PD: 1.0 sec | NA: 8       | LB: 0.0                     |
|             |             |             |             | Nuts - \$S104606 Vandetanib |

# Sample Information

Sample Name: F 4705 S 104606 Vandetanib  
Sample Type:  
Injection#: 99  
Injection Volume: 10.00 ul  
Run Time: 20.0 Minutes

Acq Method: T  
Processing Method: K1  
Channel: 254.0 nm

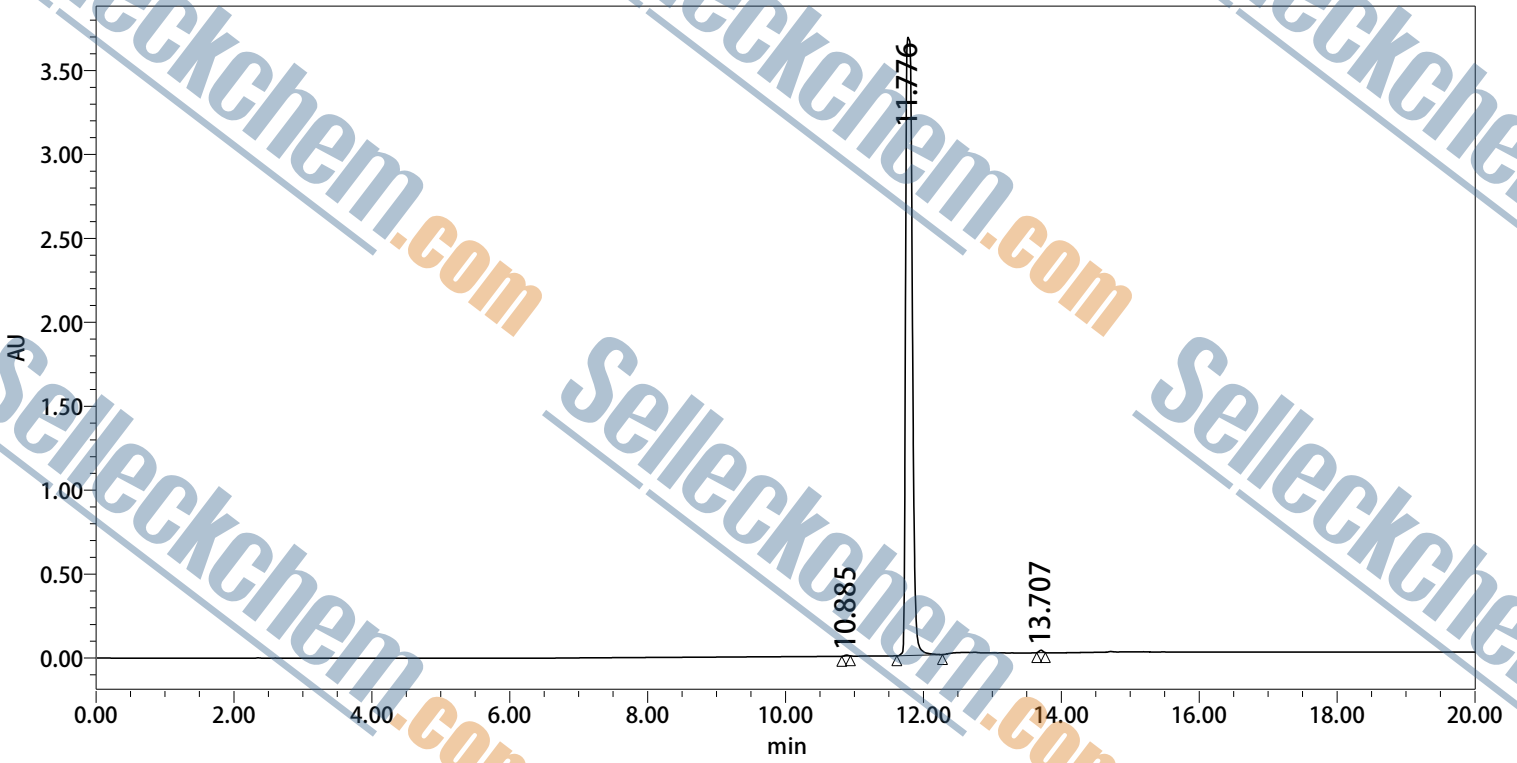

Result

|   | Name | RT     | Area     | Height  | % Area |
|---|------|--------|----------|---------|--------|
| 1 |      | 10.885 | 21537    | 5751    | 0.09   |
| 2 |      | 11.776 | 24709267 | 3683001 | 99.70  |
| 3 |      | 13.707 | 53984    | 14168   | 0.22   |

9.235  
8.141  
8.064  
7.808  
7.788  
8.149  
7.696  
7.574  
7.570  
7.551  
7.546  
7.389  
7.373  
7.369  
7.353  
7.349  
7.333  
7.123  
7.101  
7.080  
7.075  
7.042  
7.024  
7.016  
5.701

4.039  
4.027  
4.022  
4.012  
4.001  
3.985  
3.964  
3.949  
3.937  
3.921  
3.790  
3.765  
3.672  
3.644  
3.401  
3.376  
3.331  
3.226  
3.203  
3.176  
2.960  
2.950  
2.944  
2.812  
2.801  
2.783  
2.765  
2.733  
2.710  
2.542  
2.512  
2.503  
0.003  
-0.000

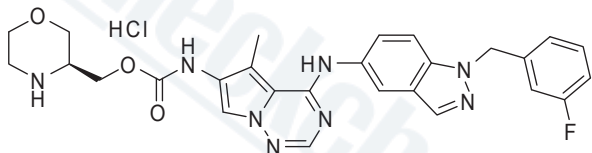

S105603, DMSO-d6

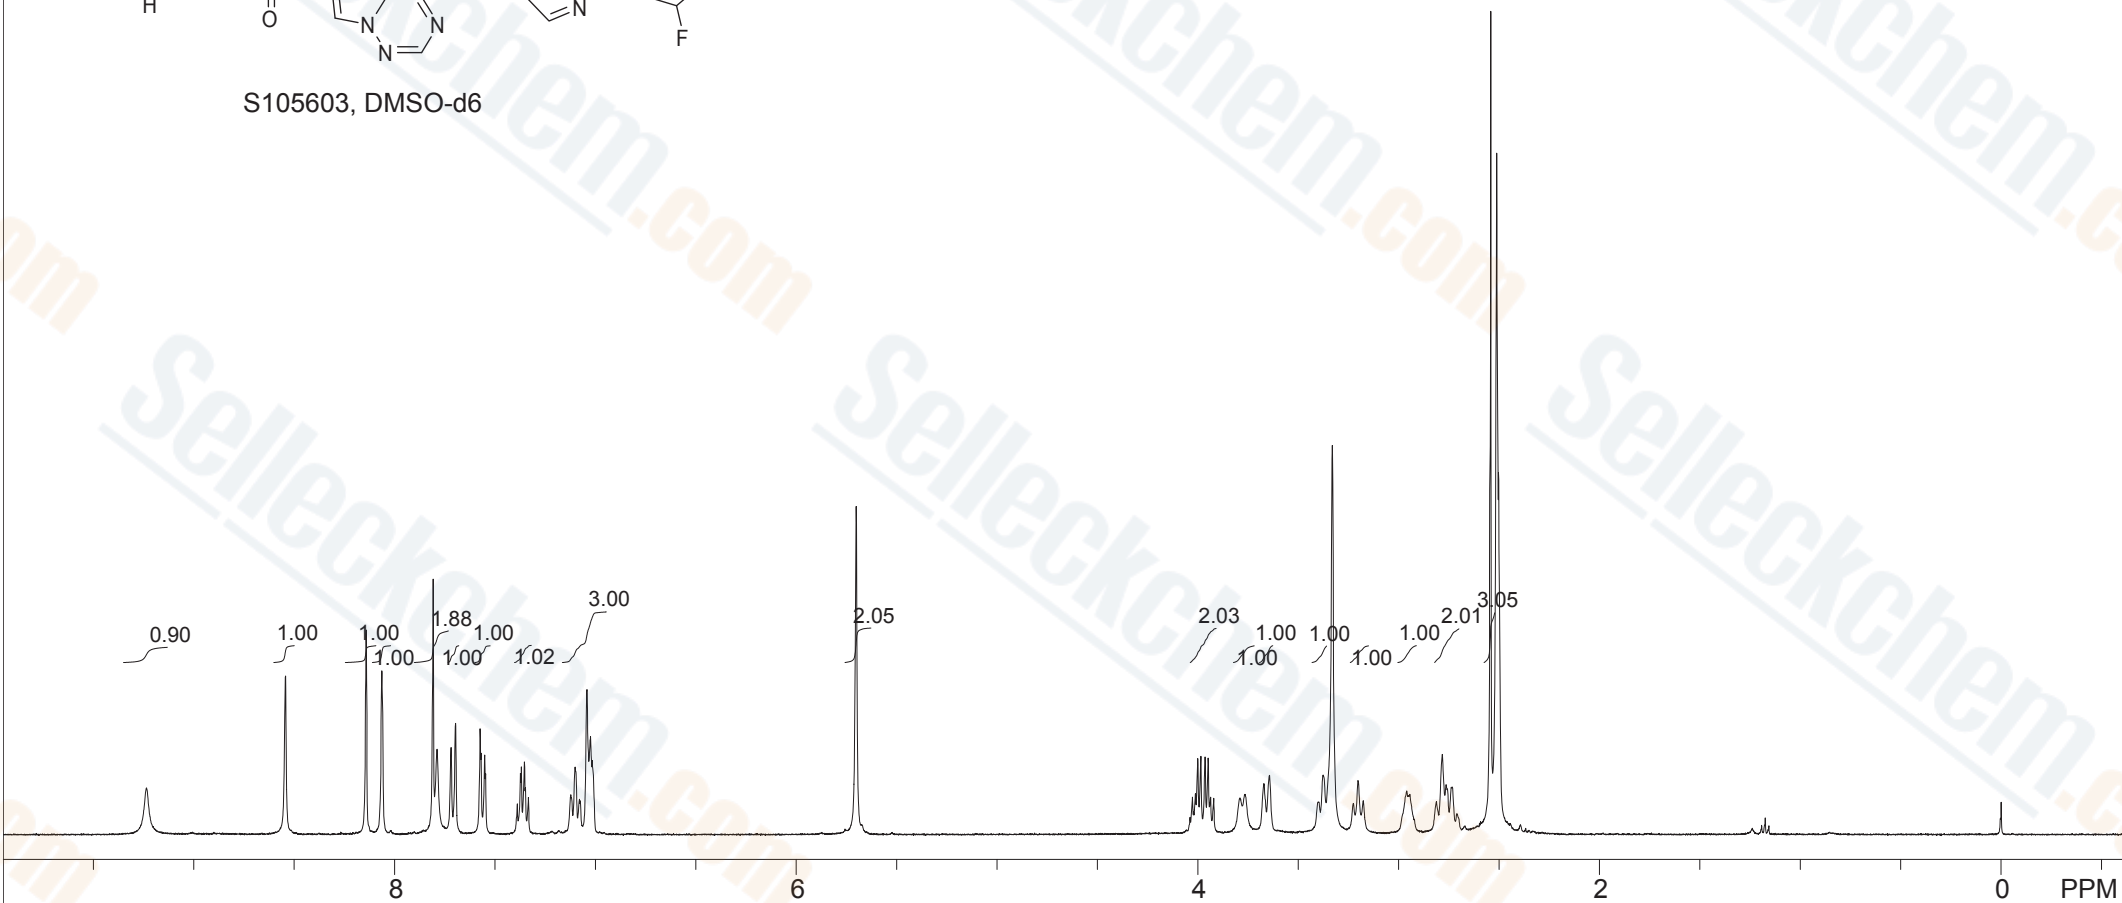

Std proton;blank line

|             |             |            |             |             |         |                             |
|-------------|-------------|------------|-------------|-------------|---------|-----------------------------|
| F1: 399.635 | F2: 100.497 | SW1: 7225  |             | OF1: 2805.6 |         | PTS1d: 14803 , 16384        |
| EX: s2pul   |             | PW: 7.2 us | PD: 2.0 sec | NA: 8       | LB: 0.0 | Nuts - \$S105603 BMS-599626 |

# SAMPLE INFORMATION

Sample Name: F1659 S105603 BMS-599626(AC480) Acquirde By: System  
Sample Type: Acq. Method Set: Y  
Viat: 1 Processing Method: 316  
Injection #: 2 Channel Name:  
Injection Volume: 20.00 ul Proc. Chnl. Descr: 316  
Run Time: 30.0 Minutes  
Sample Set Name:

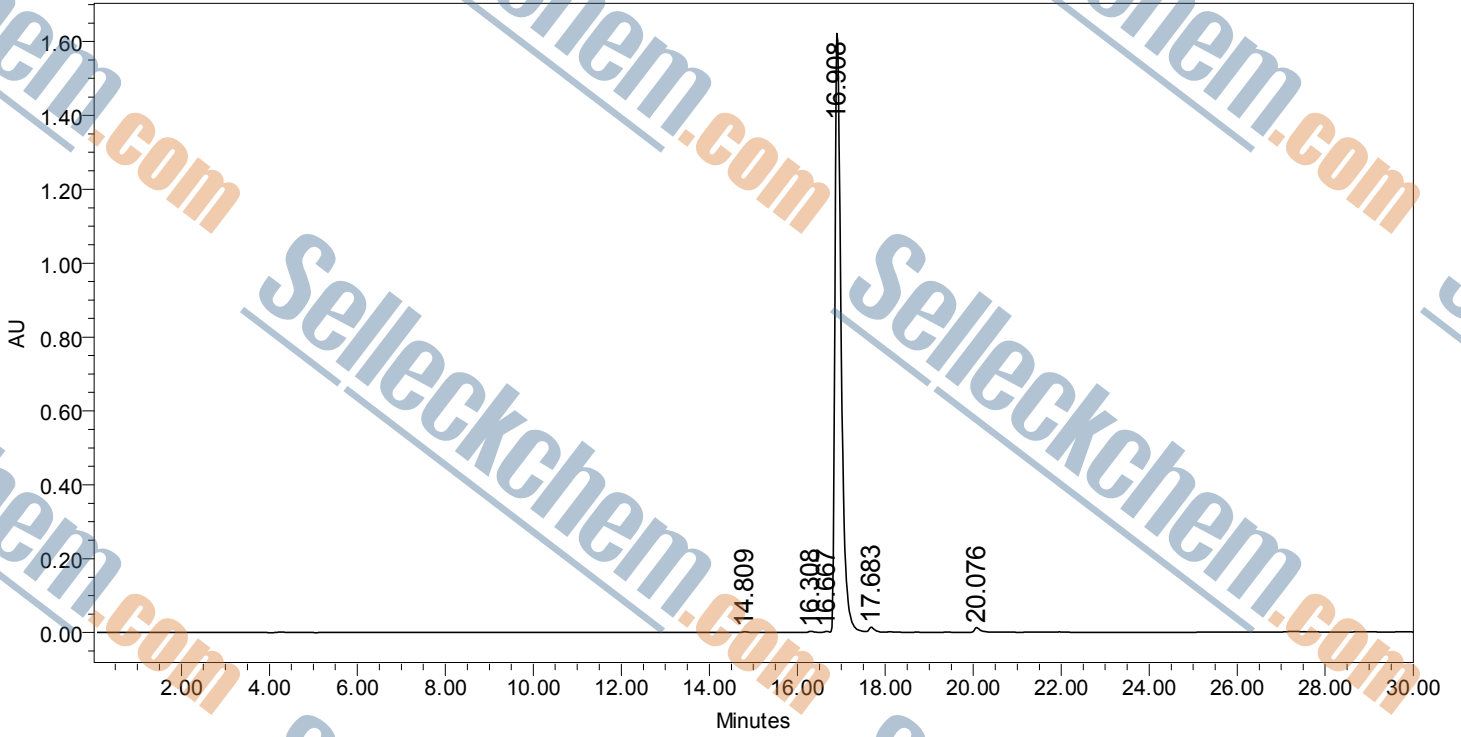

|   | RT     | Area     | Height  | % Area |
|---|--------|----------|---------|--------|
| 1 | 14.809 | 8696     | 1551    | 0.05   |
| 2 | 16.308 | 24294    | 2970    | 0.15   |
| 3 | 16.667 | 16105    | 2317    | 0.10   |
| 4 | 16.908 | 16058543 | 1633145 | 99.02  |
| 5 | 17.683 | 108387   | 13245   | 0.37   |
| 6 | 20.076 | 99312    | 12211   | 0.31   |

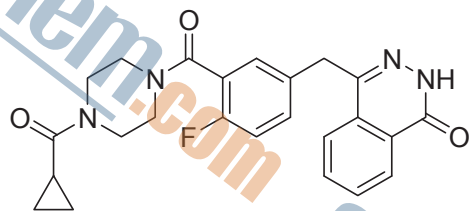

S106021, DMSO-d6

8.272 8.254 7.980 7.959 7.949 7.917 7.915 7.898 7.879 7.853 7.834 7.816 7.461 7.447 7.379 7.375 7.371 7.267 7.256 7.244 7.221 4.354 4.336 4.315 3.763 3.752 3.745 3.715 3.706 3.700 3.690 3.672 3.662 3.624 3.623 3.592 3.561 3.551 3.538 3.514 3.497 3.432 3.430 3.429 3.421 3.419 3.396 3.393 3.377 3.368 3.358 3.351 3.328 3.328 3.259 3.237 3.232 3.229 3.220 3.217 3.204 3.189 3.189 3.179 3.167 3.163 3.157 3.147 3.130 2.502 1.999 1.998

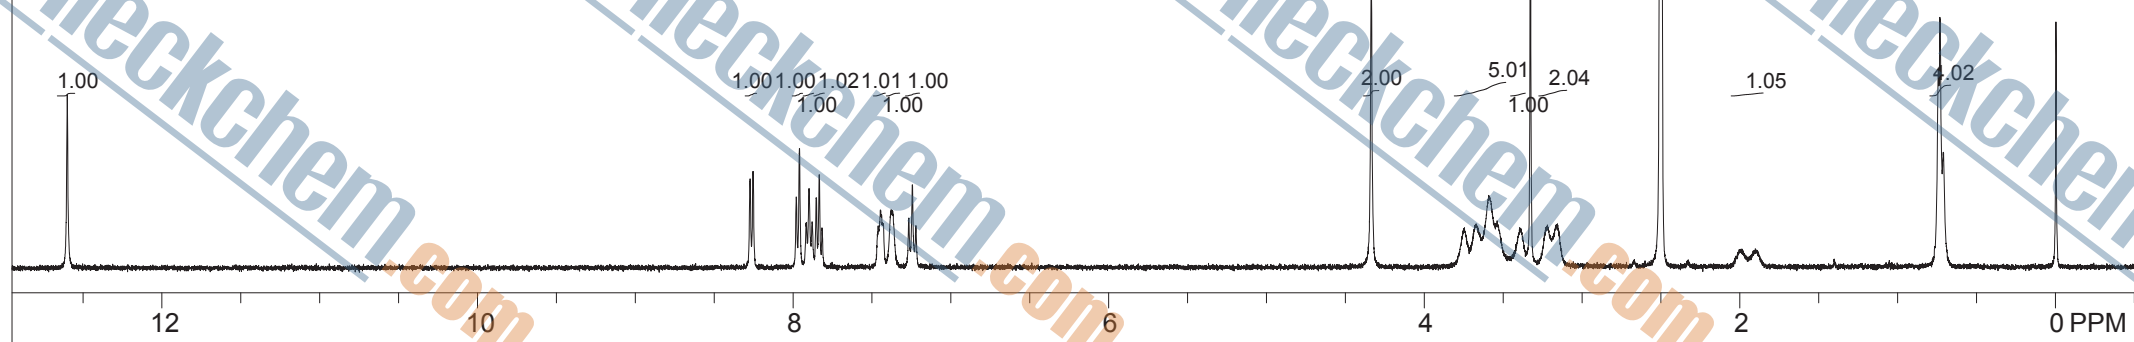

|                                                               |             |             |             |                      |                                    |
|---------------------------------------------------------------|-------------|-------------|-------------|----------------------|------------------------------------|
| STANDARD PROTON PARAMETERSga;blank line;blank line;blank line |             |             |             |                      |                                    |
| F1: 399.665                                                   | F2: 100.504 | SW1: 8803   | OF1: 3606.2 | PTS1d: 32768 , 32768 |                                    |
| EX: s2pul                                                     | PW: 6.5 us  | PD: 1.0 sec | NA: 8       | LB: 0.0              | Nuts - SS106021 Olaparib (AZD2281) |



=====  
\*\*\* End of Report \*\*\*

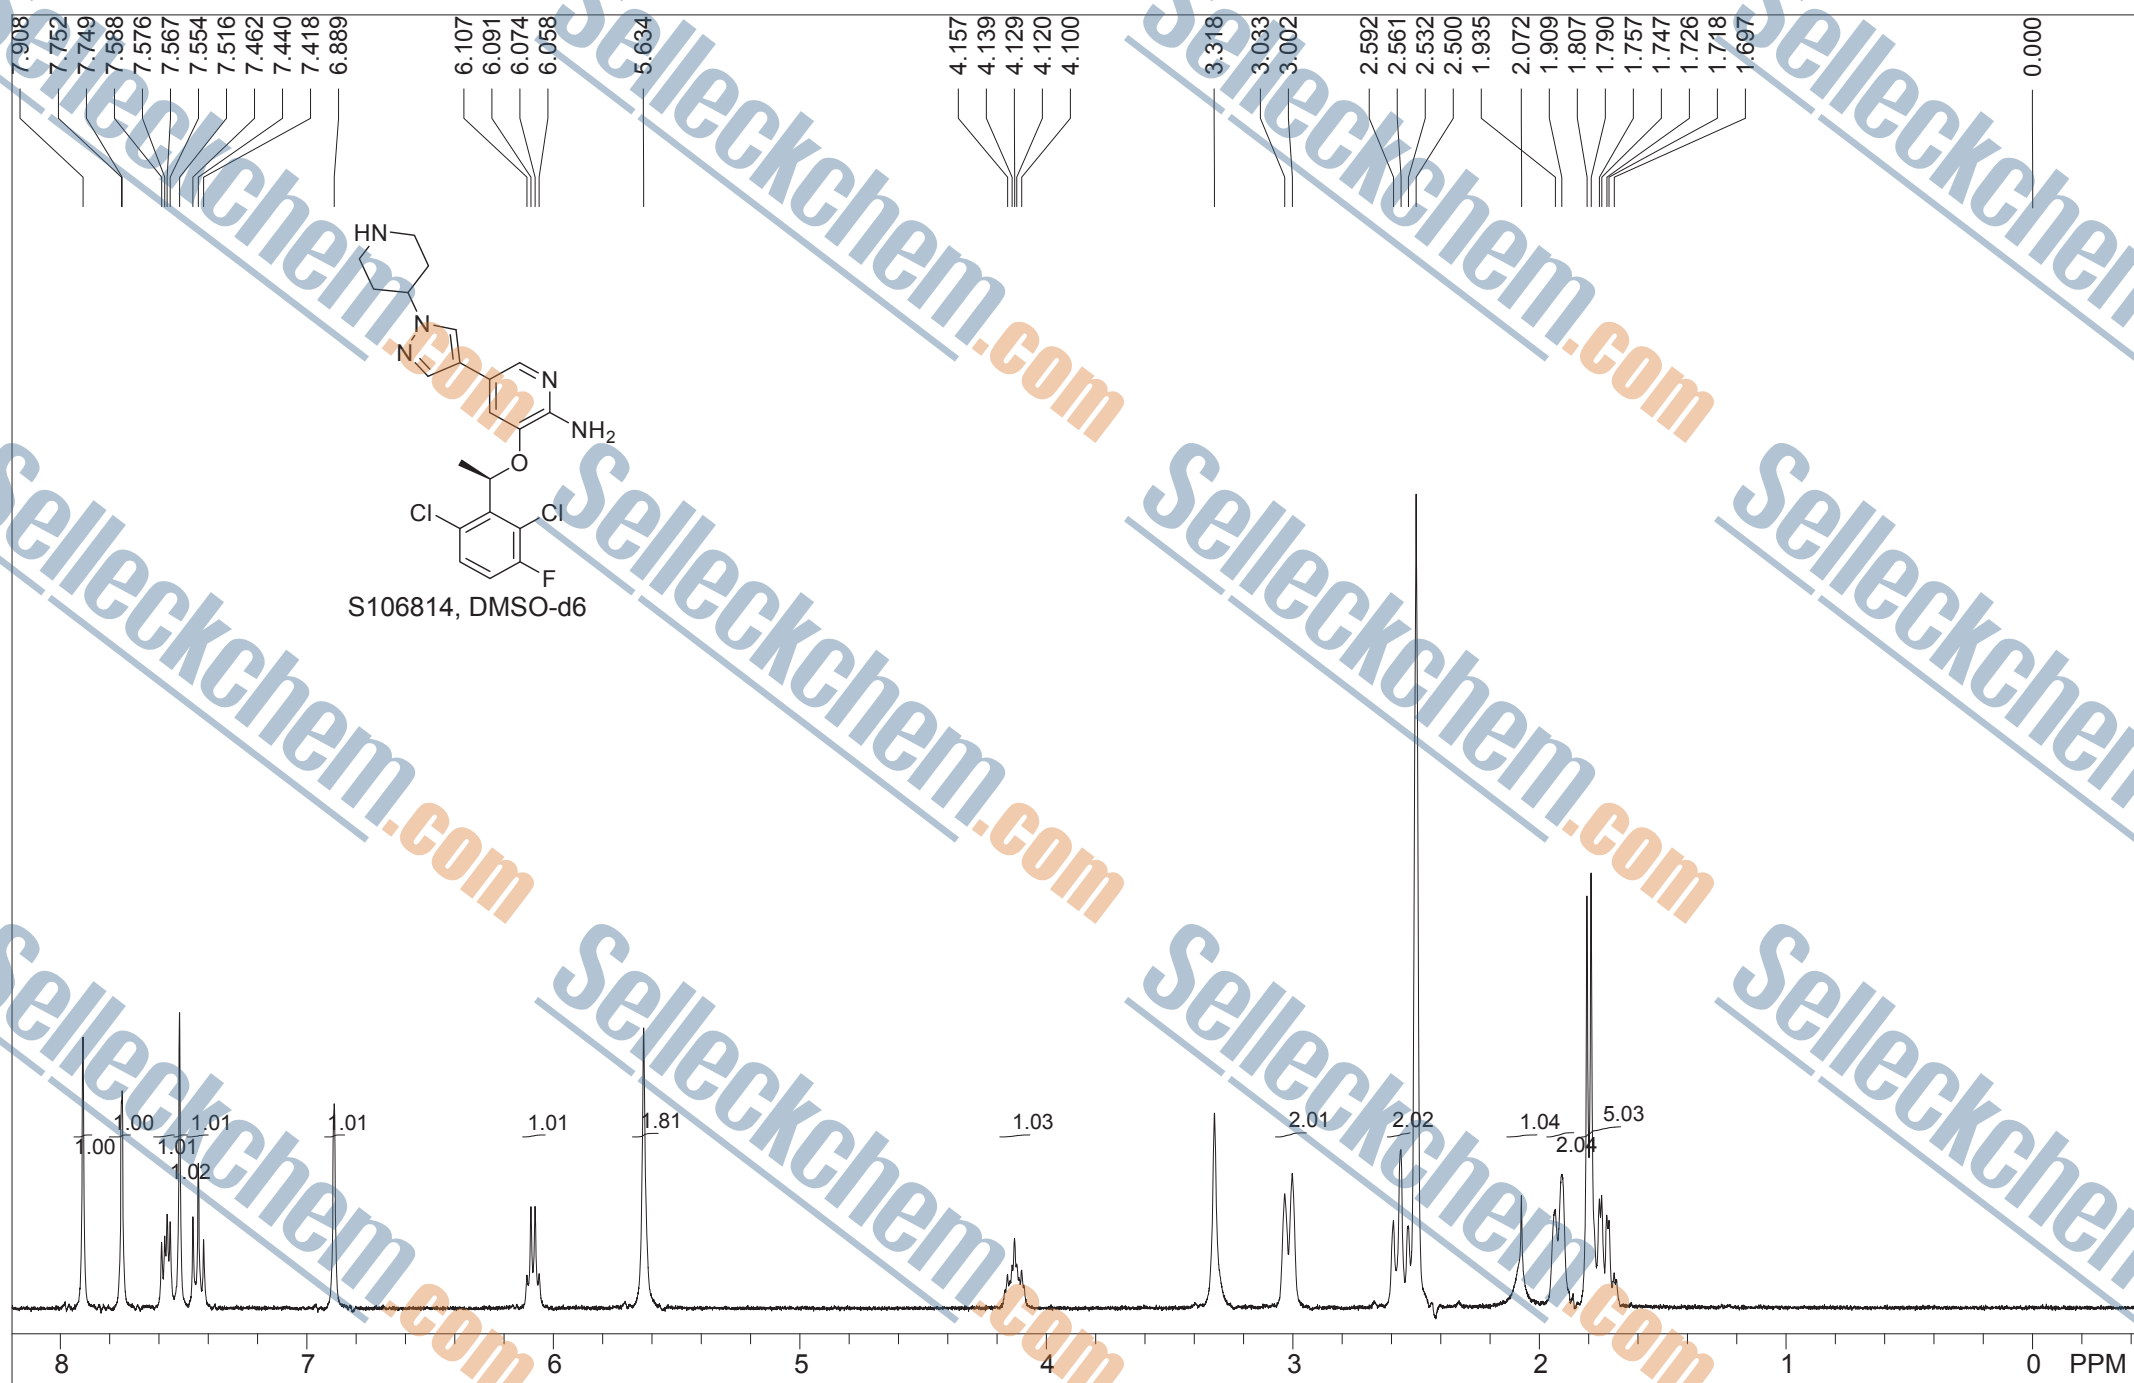

STANDARD PROTON PARAMETERS

|                                          |             |             |             |                      |
|------------------------------------------|-------------|-------------|-------------|----------------------|
| F1: 399.665                              | F2: 100.504 | SW1: 8803   | OF1: 3604.9 | PTS1d: 32768 , 32768 |
| EX: s2pul                                | PW: 6.5 us  | PD: 2.0 sec | NA: 8       | LB: 0.0              |
| Nuts - SS106814 Crizotinib (PF-02341066) |             |             |             |                      |





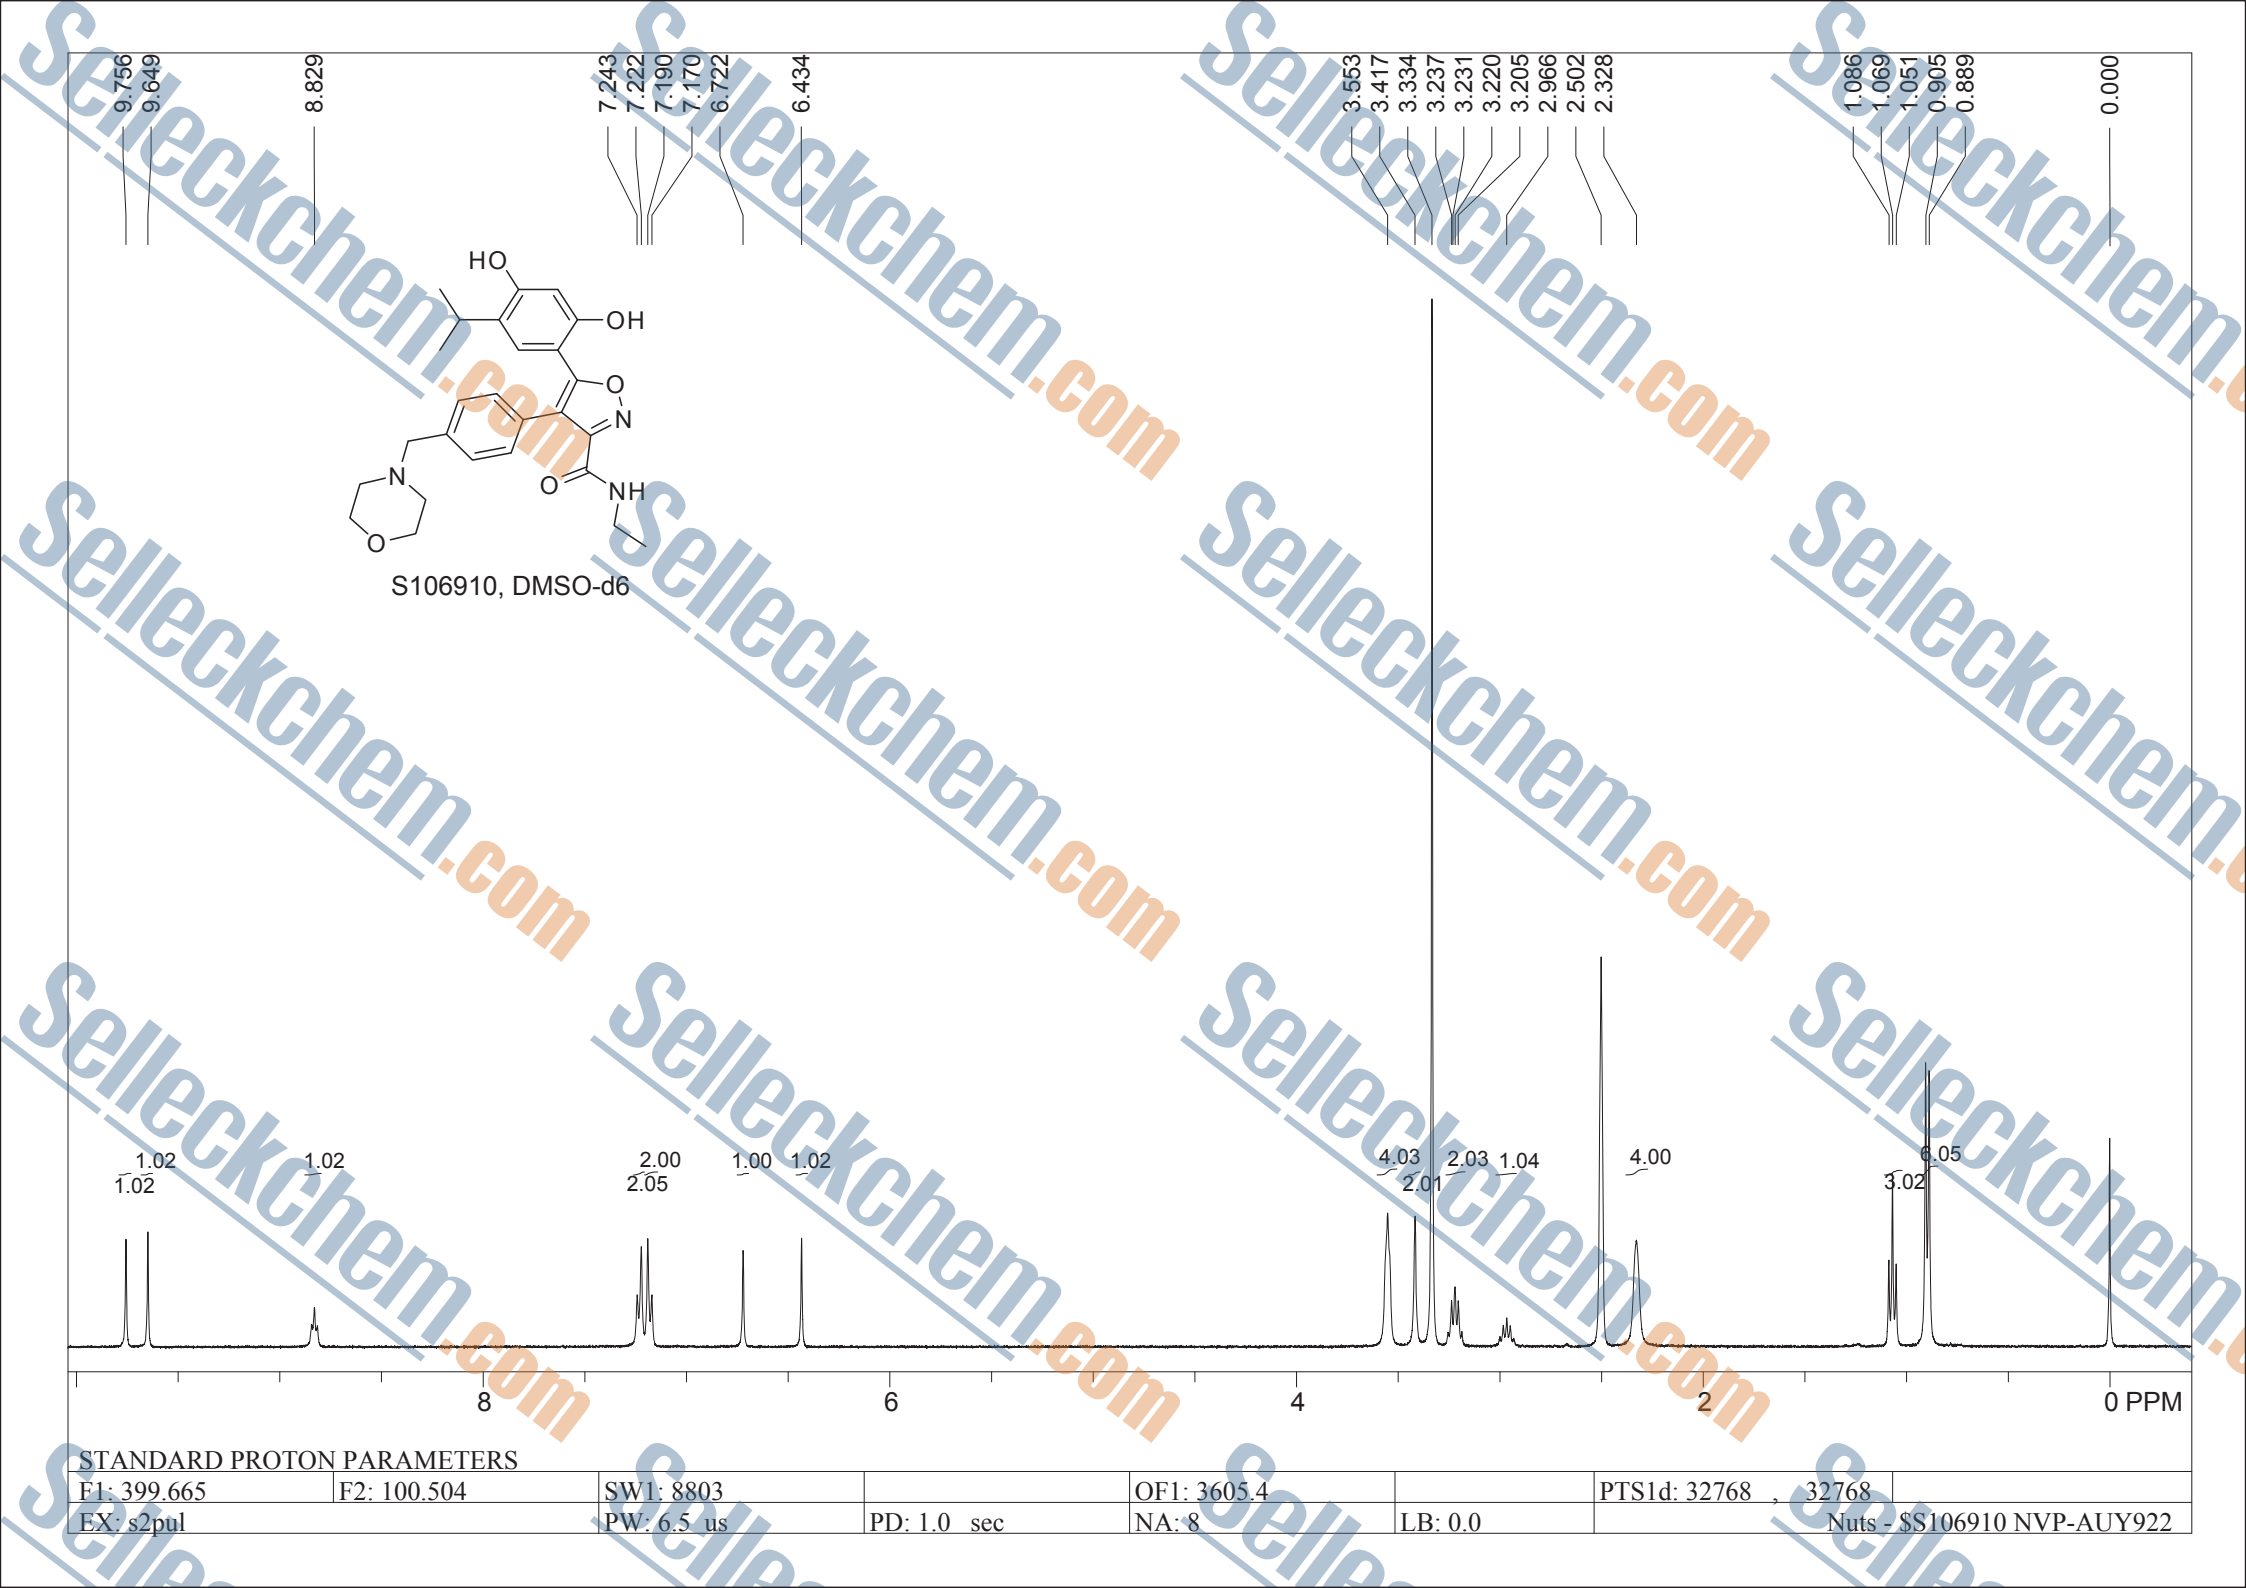

STANDARD PROTON PARAMETERS

|             |             |             |             |                               |
|-------------|-------------|-------------|-------------|-------------------------------|
| F1: 399.665 | F2: 100.504 | SW1: 8803   | OF1: 3605.4 | PTS1d: 32768 , 32768          |
| EX: s2pul   | PW: 6.5 us  | PD: 1.0 sec | NA: 8       | LB: 0.0                       |
|             |             |             |             | Nuts - \$\$S106910 NVP-AUY922 |

```
=====
Acq. Operator   : SYSTEM                      Seq. Line :    3
Acq. Instrument : 12601c                     Location  : Vial 3

                                           Inj Volume : 5.000 µl
Different Inj Volume from Sample Entry! Actual Inj Volume : 1.500 µl
=====
```

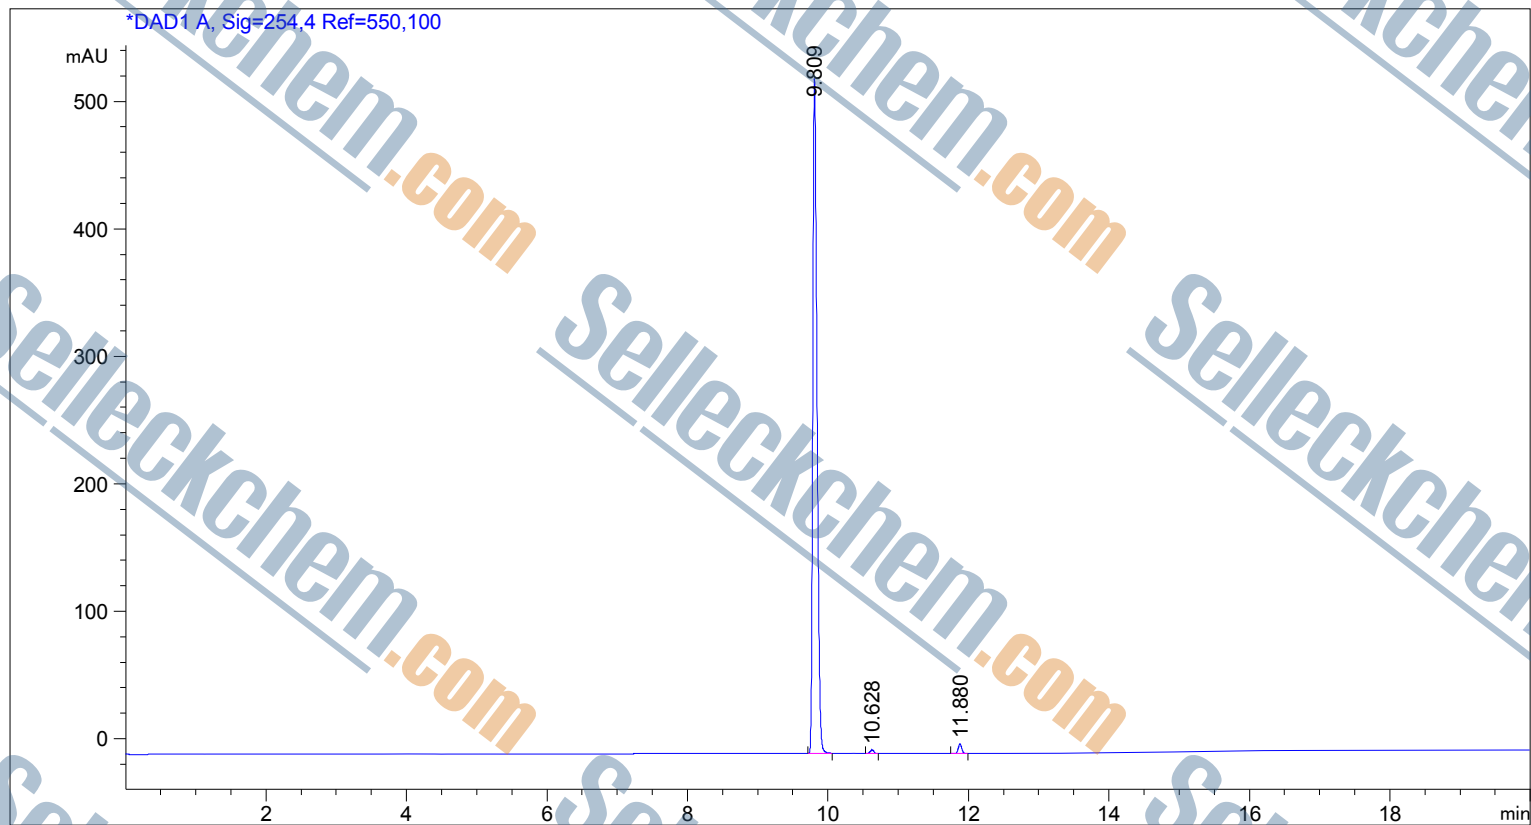

Area Percent Report

```
Sorted By      :      Signal
Multiplier     :      1.0000
Dilution      :      1.0000
Use Multiplier & Dilution Factor with ISTDs
```

Signal 1: DAD1 A, Sig=254,4 Ref=550,100  
Signal has been modified after loading from rawdata file!

| Peak # | RetTime [min] | Type | Width [min] | Area [mAU*s] | Height [mAU] | Area %  |
|--------|---------------|------|-------------|--------------|--------------|---------|
| 1      | 9.809         | BV   | 0.0643      | 2214.38208   | 529.57391    | 99.0074 |
| 2      | 10.628        | BB   | 0.0565      | 10.71367     | 2.97805      | 0.2756  |
| 3      | 11.880        | BB   | 0.0561      | 27.41161     | 7.60306      | 0.7169  |

Totals : 2252.50736 540.15502

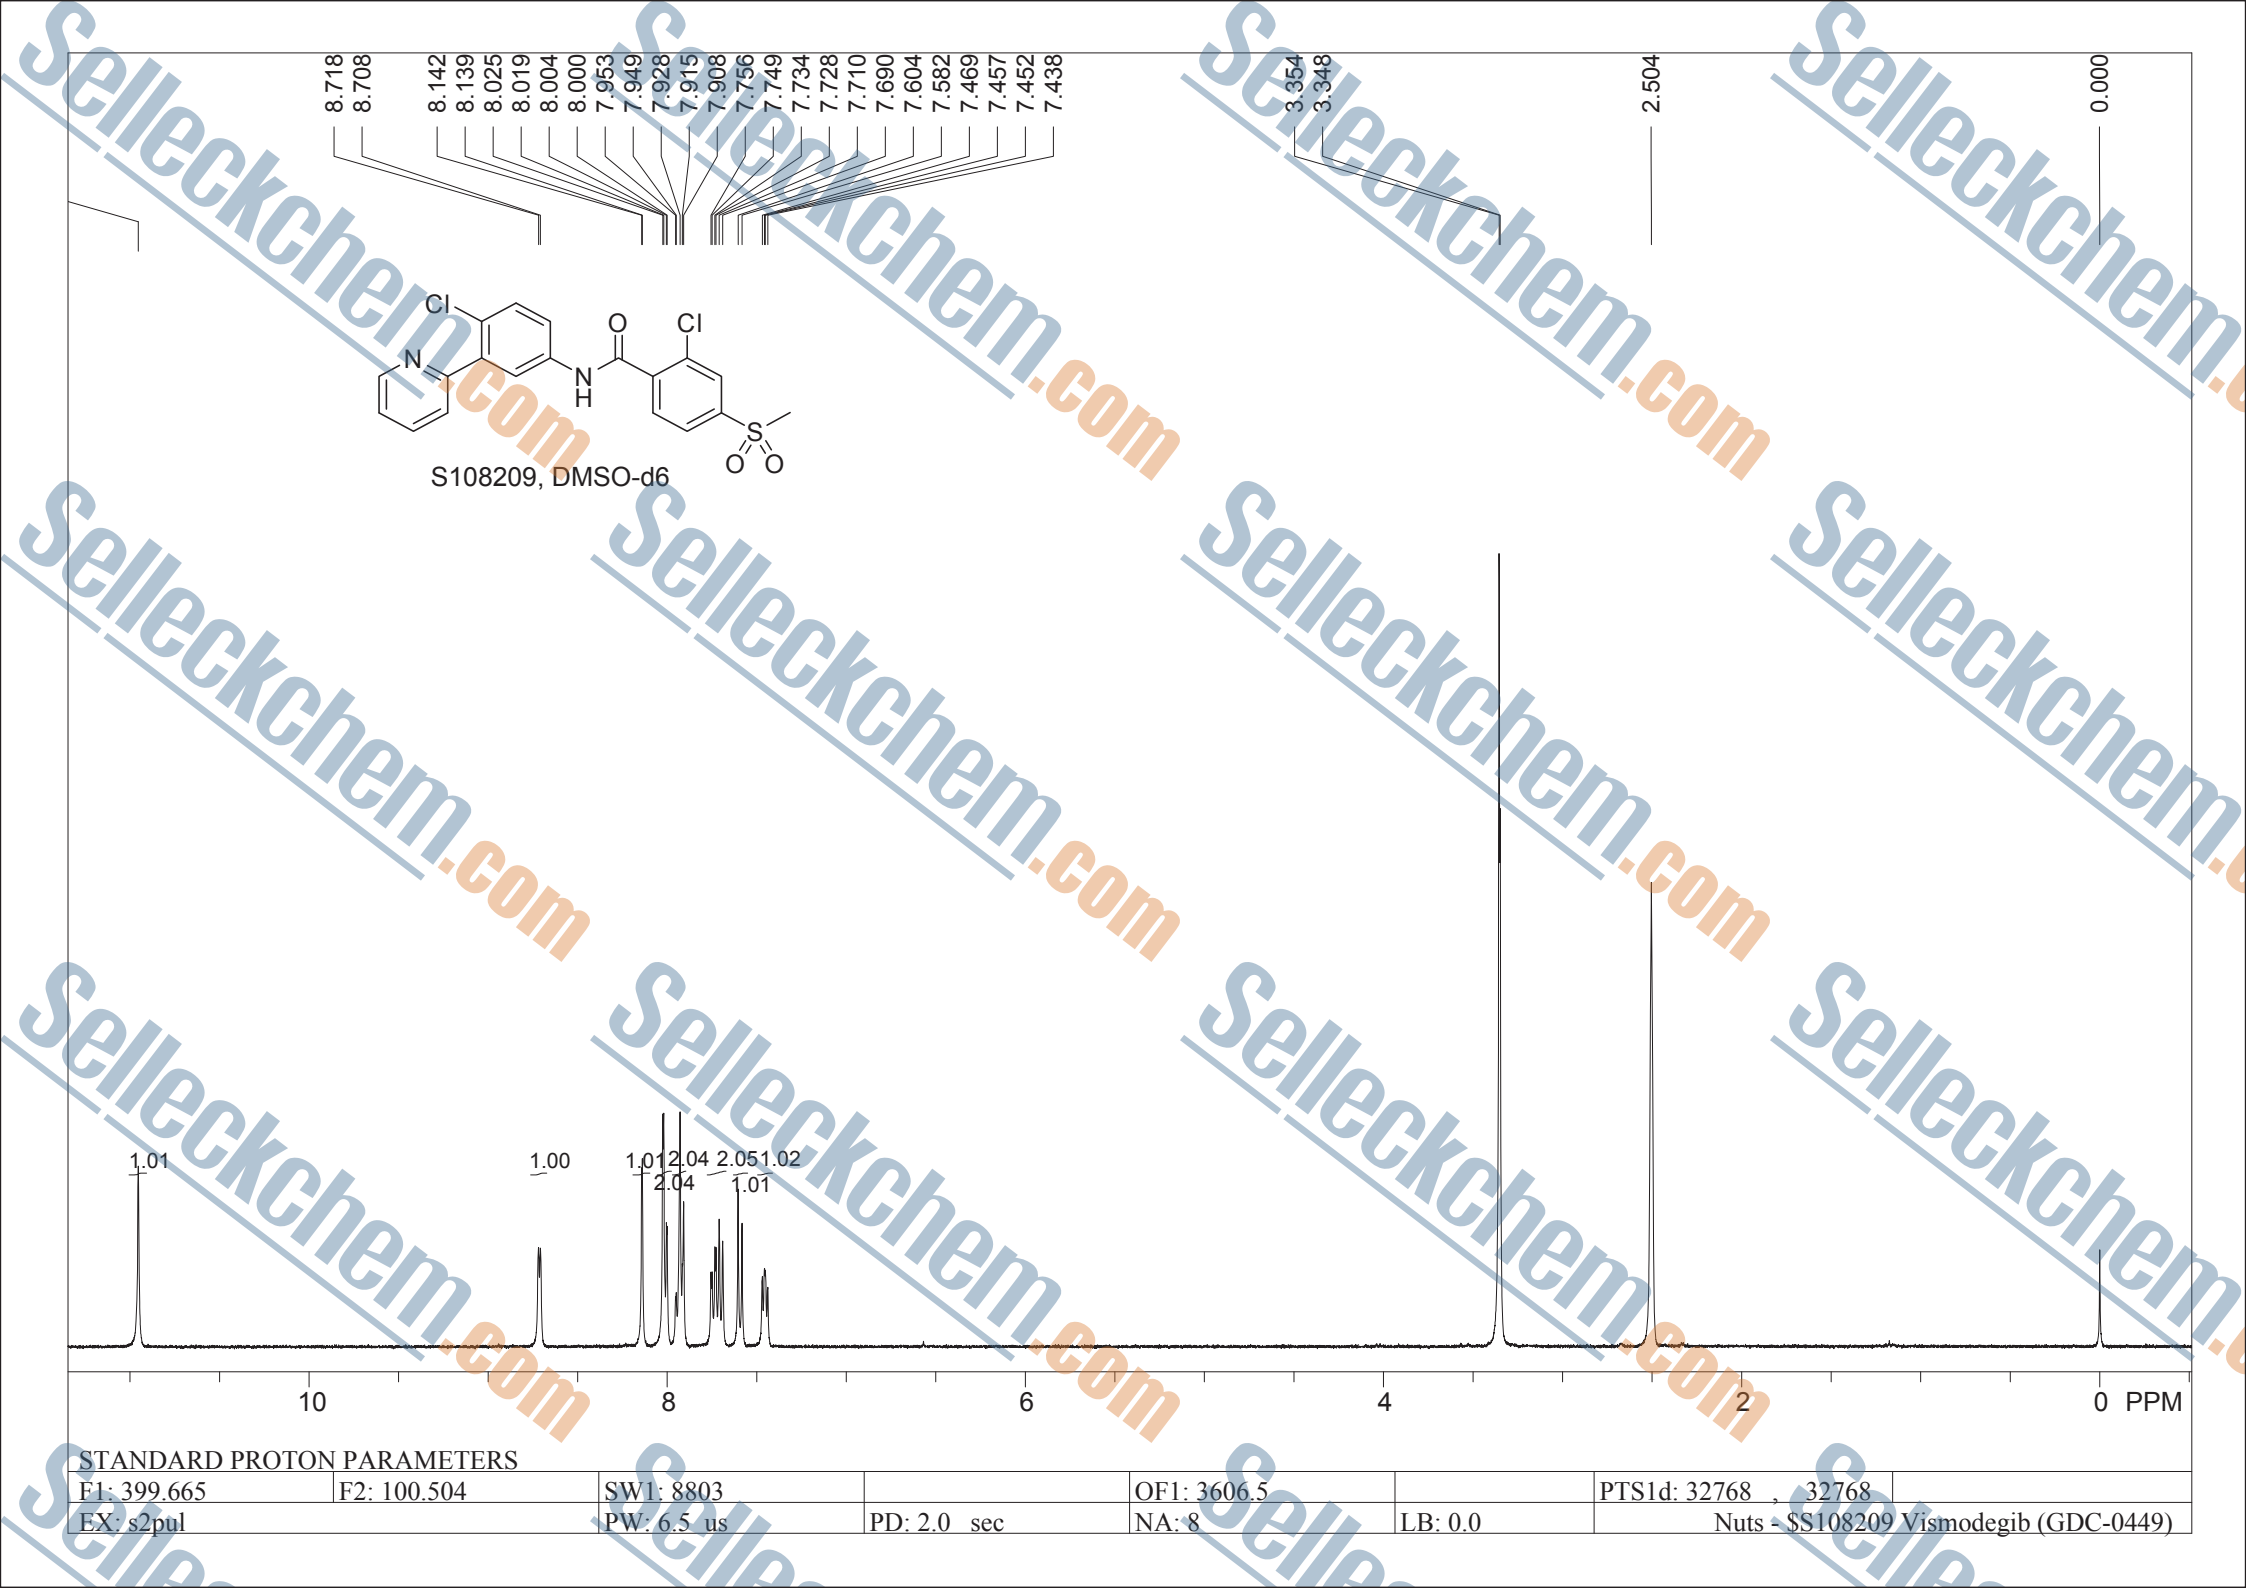

8.718  
8.708  
8.142  
8.139  
8.025  
8.019  
8.004  
8.000  
7.953  
7.949  
7.928  
7.915  
7.908  
7.756  
7.749  
7.734  
7.728  
7.710  
7.690  
7.604  
7.582  
7.469  
7.457  
7.452  
7.438

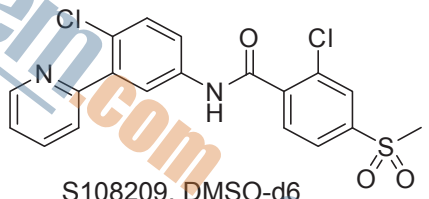

1.01  
1.00  
1.01  
2.04  
2.05  
1.02  
1.01

3.354  
3.348

2.504

0.000

10

8

6

4

2

0 PPM

STANDARD PROTON PARAMETERS

|                                       |             |             |             |                      |
|---------------------------------------|-------------|-------------|-------------|----------------------|
| F1: 399.665                           | F2: 100.504 | SW1: 8803   | OF1: 3606.5 | PTS1d: 32768 , 32768 |
| EX: s2pul                             | PW: 6.5 us  | PD: 2.0 sec | NA: 8       | LB: 0.0              |
| Nuts - SS108209 Vismodegib (GDC-0449) |             |             |             |                      |

```

=====
Acq. Operator   : SYSTEM                      Seq. Line :    5
Acq. Instrument : 12601c                     Location  : Vial 16

                                           Inj Volume : 2.000 µl
Different Inj Volume from Sample Entry! Actual Inj Volume : 1.000 µl
    
```

Additional Info : Peak(s) manually integrated

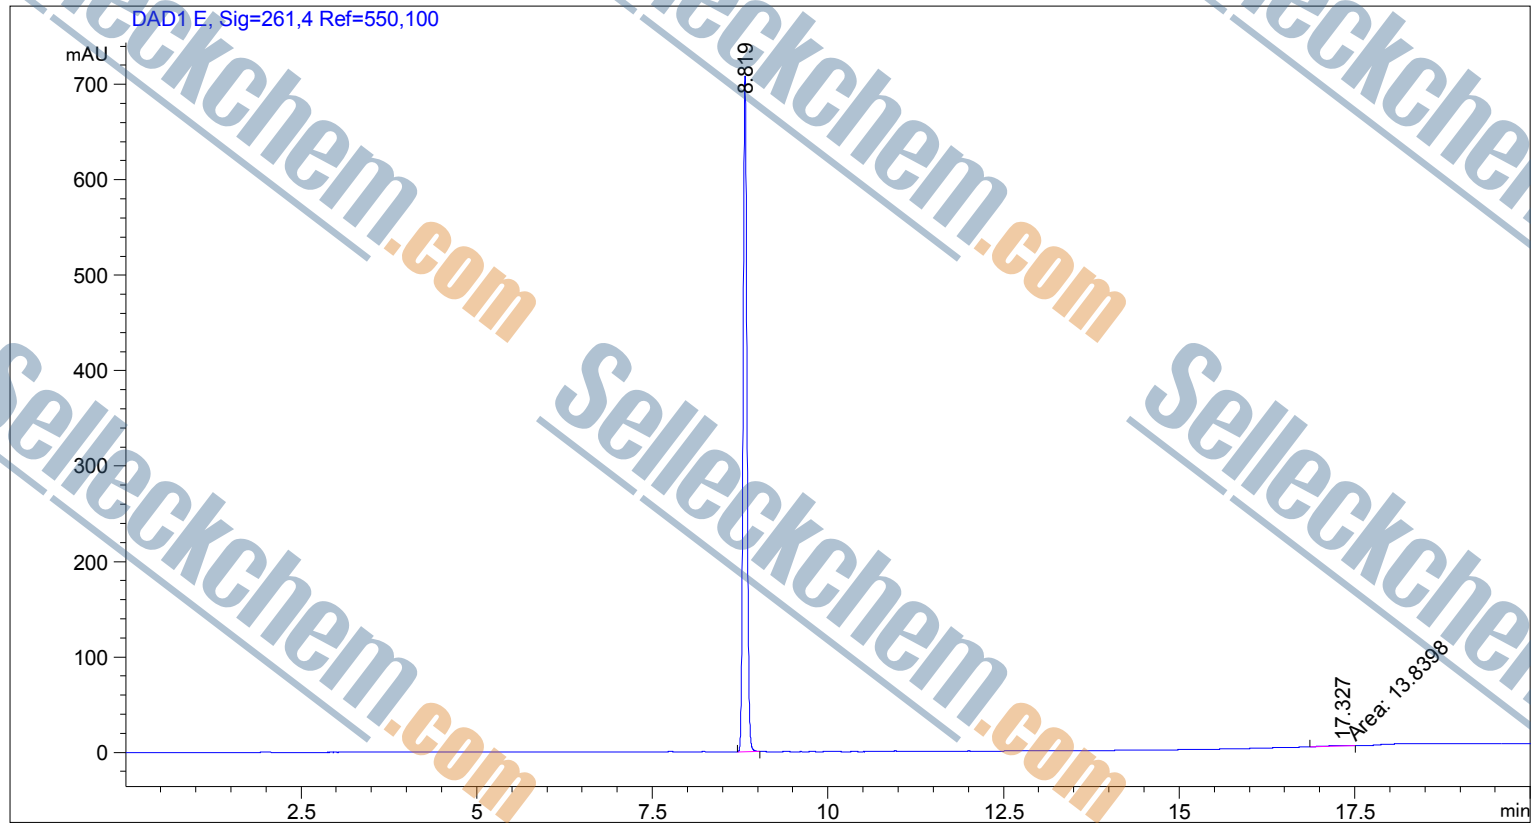

Area Percent Report

```

Sorted By      : Signal
Multiplier     : 1.0000
Dilution       : 1.0000
Use Multiplier & Dilution Factor with ISTDs
    
```

Signal 1: DAD1 E, Sig=261,4 Ref=550,100

| Peak # | RetTime [min] | Type | Width [min] | Area [mAU*s] | Height [mAU] | Area %  |
|--------|---------------|------|-------------|--------------|--------------|---------|
| 1      | 8.819         | BB   | 0.0587      | 2685.39404   | 708.08606    | 99.4873 |
| 2      | 17.327        | MM   | 0.4363      | 13.83976     | 5.28720e-1   | 0.5127  |

Totals : 2699.23380 708.61478

\*\*\* End of Report \*\*\*

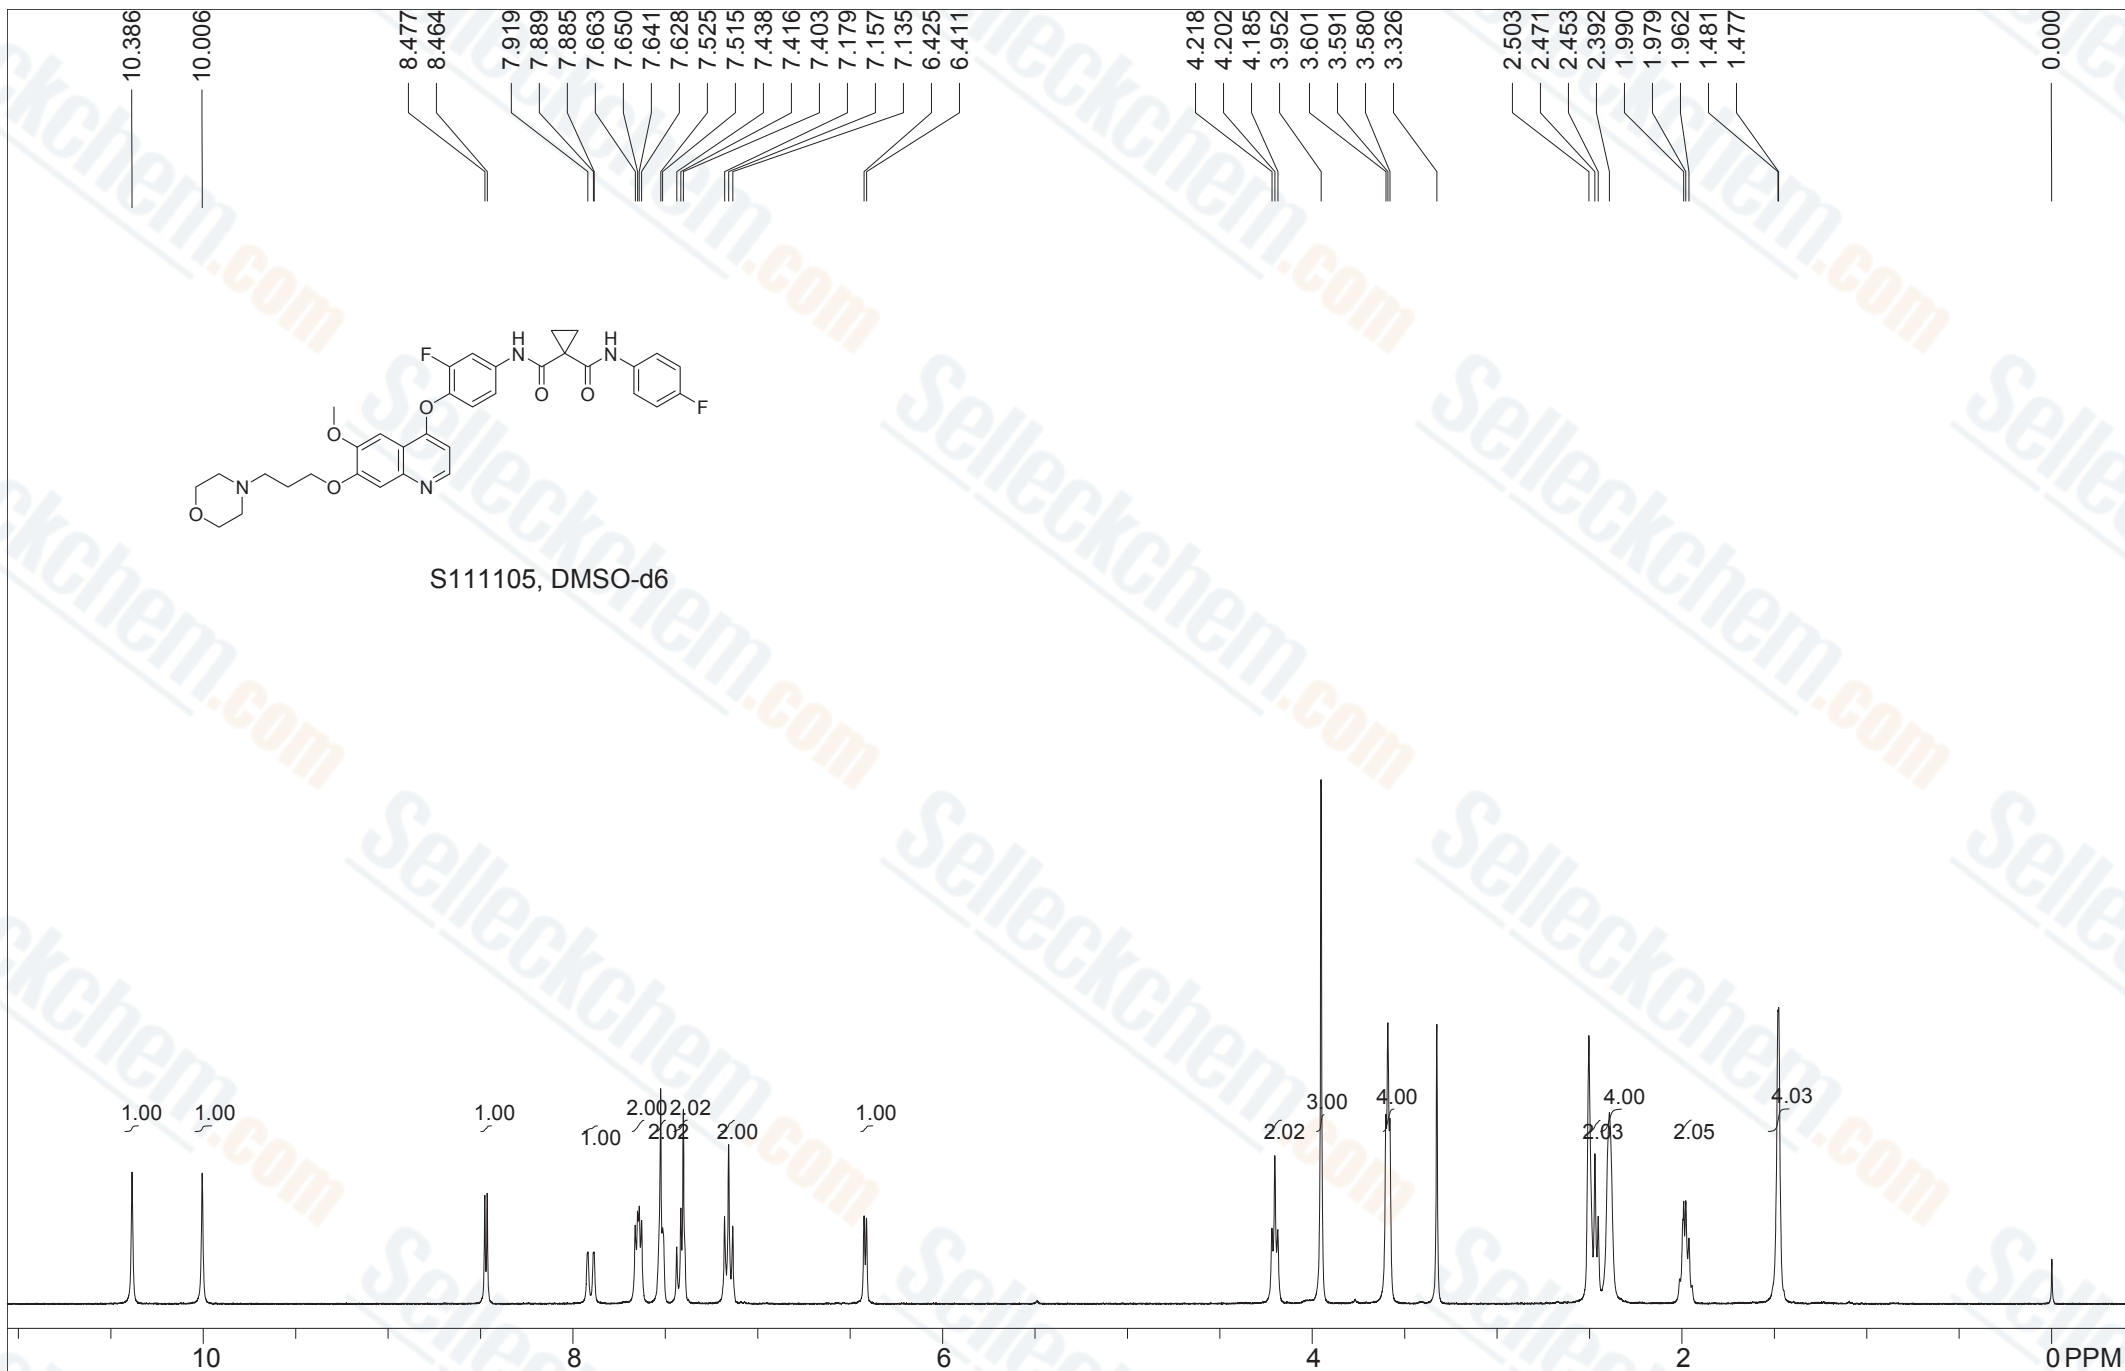

S111105, DMSO-d6

Std proton; blank line

|             |             |             |             |                      |
|-------------|-------------|-------------|-------------|----------------------|
| F1: 399.647 | F2: 100.500 | SW1: 8013   | OF1: 2011.7 | PTS1d: 16416, 32768  |
| EX: s2pul   | PW: 7.2 us  | PD: 2.0 sec | NA: 8       | LB: 0.0              |
|             |             |             |             | Nuts - S111105 XL880 |

# SAMPLE INFORMATION

Sample Name: F1934 S111105 XL880  
Sample Type:  
Viat: 1  
Injection #: 12  
Injection Volume: 20.00 ul  
Run Time: 30.0 Minutes  
Sample Set Name:

Acquirde By: System  
Acq. Method Set: Y  
Processing Method: 254  
Channel Name:  
Proc. Chnl. Descr: 254

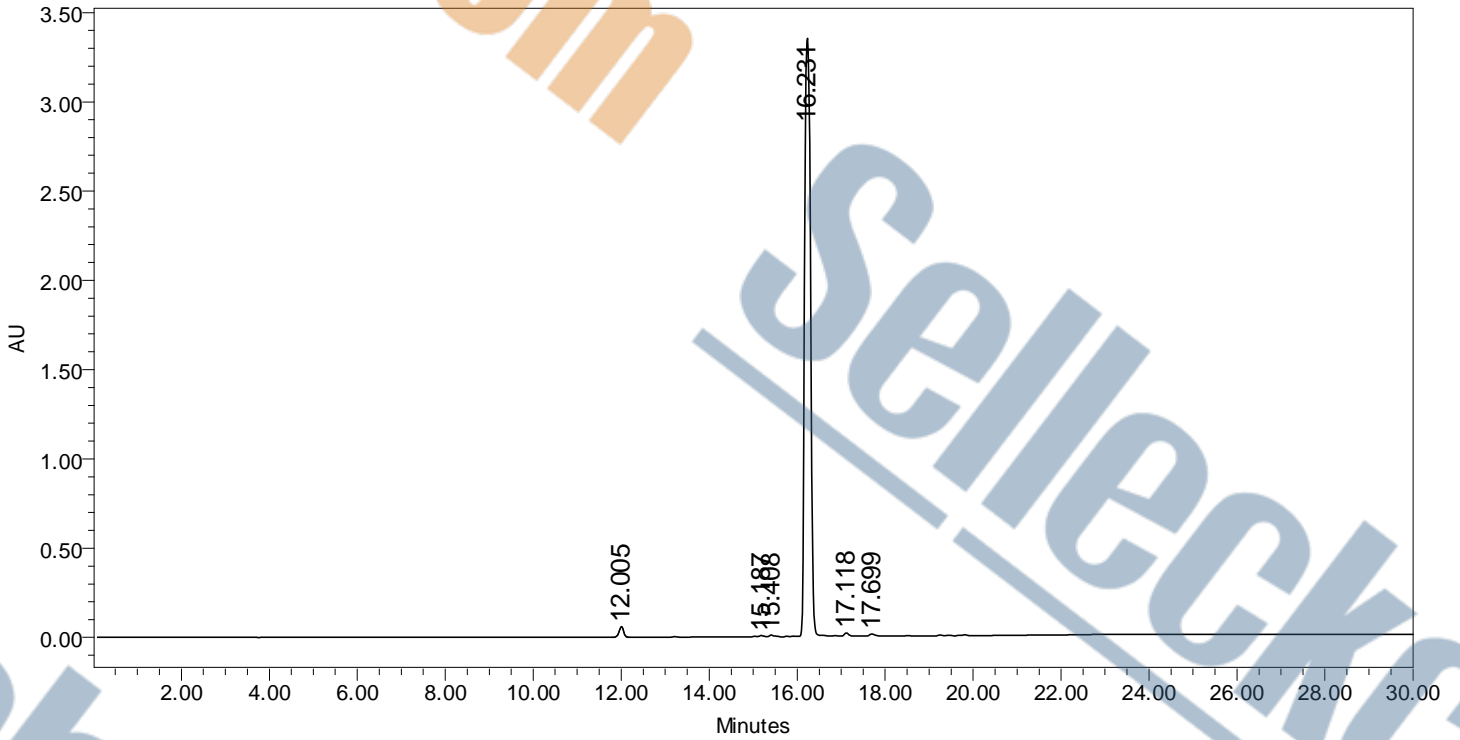

|   | RT     | Area     | Height  | % Area |
|---|--------|----------|---------|--------|
| 1 | 12.005 | 423224   | 59897   | 1.34   |
| 2 | 15.187 | 35007    | 6187    | 0.11   |
| 3 | 15.408 | 40302    | 7641    | 0.13   |
| 4 | 16.231 | 30952593 | 3352256 | 97.84  |
| 5 | 17.118 | 104141   | 16605   | 0.33   |
| 6 | 17.699 | 79265    | 10669   | 0.25   |

Acq. Operator : SYSTEM  
Acq. Instrument : 12601c

Seq. Line : 3  
Location : Vial 28

Inj Volume : 2.000 µl

Additional Info : Peak(s) manually integrated

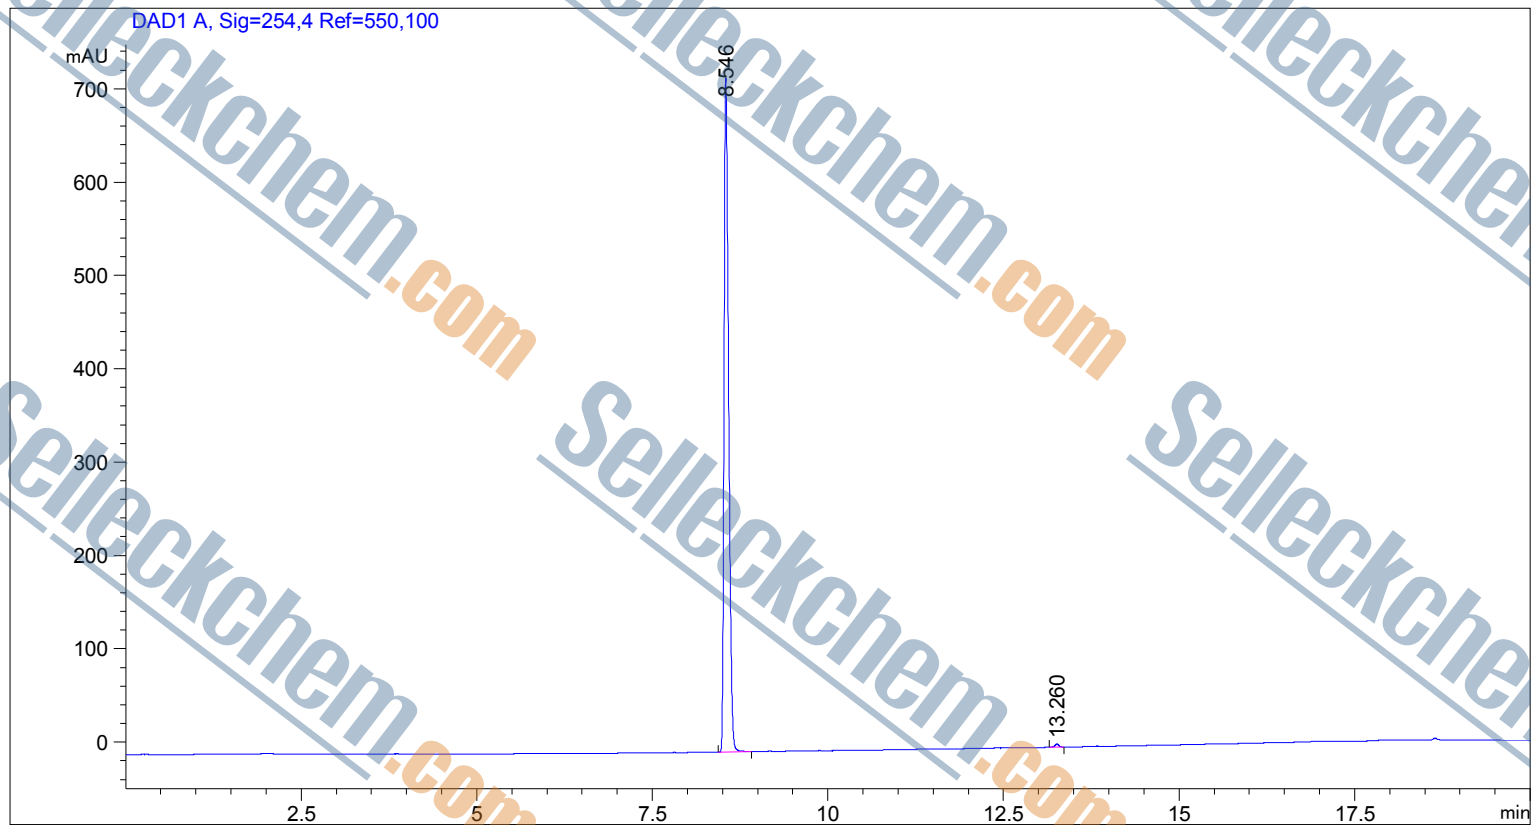

Area Percent Report

Sorted By : Signal  
Multiplier : 1.0000  
Dilution : 1.0000  
Use Multiplier & Dilution Factor with ISTDs

Signal 1: DAD1 A, Sig=254,4 Ref=550,100

| Peak #   | RetTime [min] | Type | Width [min] | Area [mAU*s] | Height [mAU] | Area %  |
|----------|---------------|------|-------------|--------------|--------------|---------|
| 1        | 8.546         | BB   | 0.0690      | 3281.45068   | 722.18146    | 99.6101 |
| 2        | 13.260        | BB   | 0.0589      | 12.84405     | 3.33552      | 0.3899  |
| Totals : |               |      |             | 3294.29473   | 725.51698    |         |

\*\*\* End of Report \*\*\*



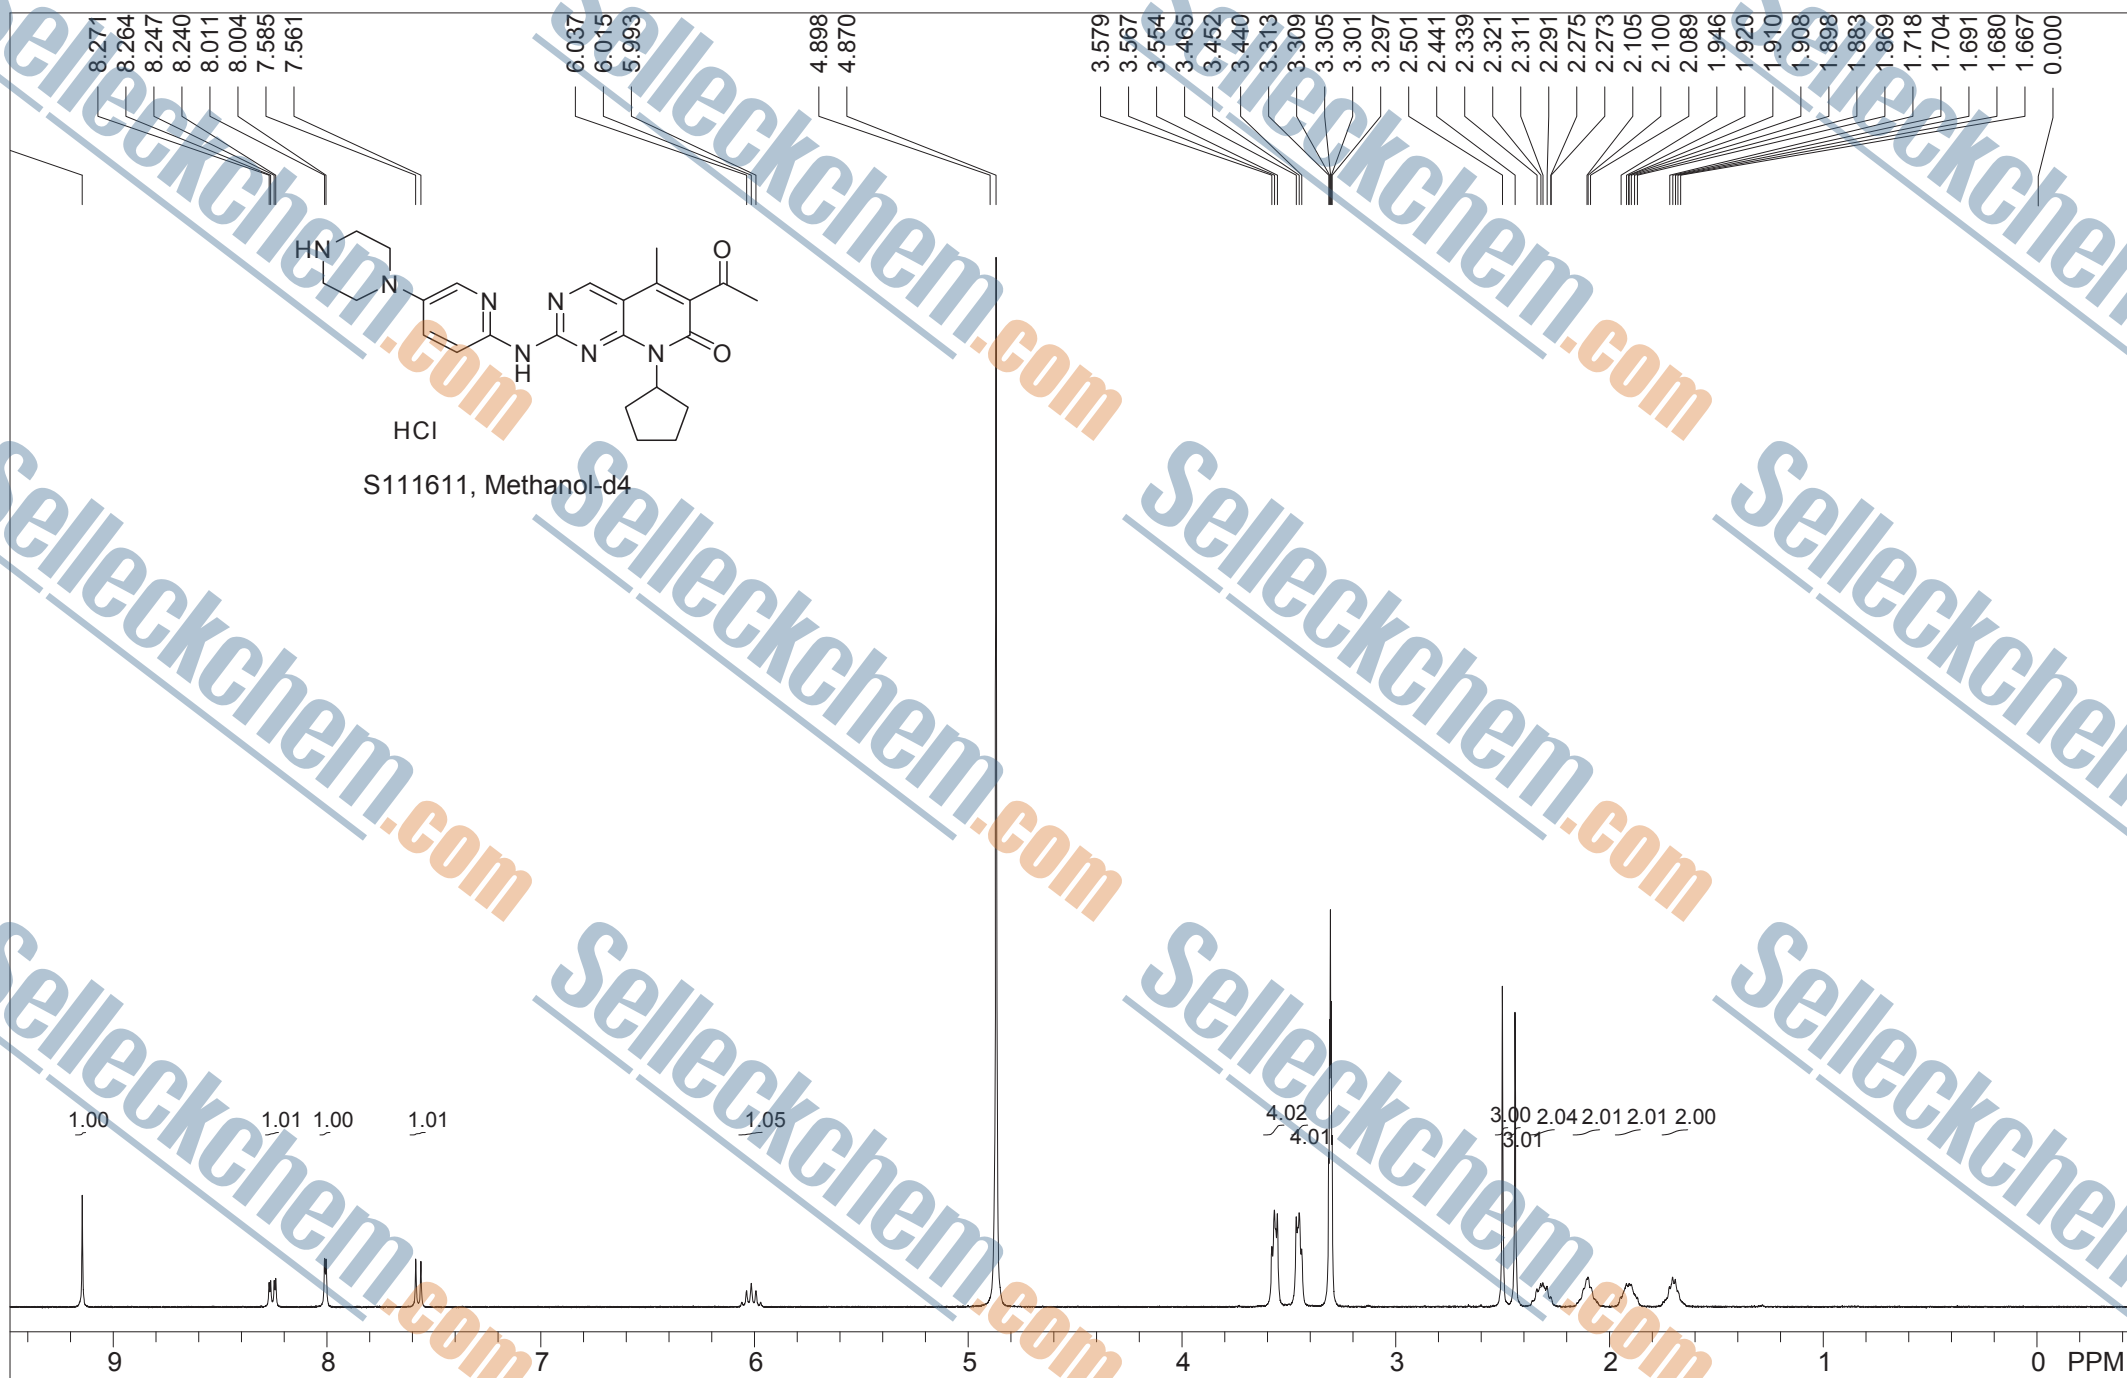

STANDARD PROTON PARAMETERSga;blank line;blank line;blank line

|             |             |             |             |                                                                    |
|-------------|-------------|-------------|-------------|--------------------------------------------------------------------|
| F1: 399.664 | F2: 100.504 | SW1: 8803   | OF1: 3598.9 | PTS1d: 32768 , 32768                                               |
| EX: s2pul   | PW: 6.5 us  | PD: 1.0 sec | NA: 8       | IN: 0.05S111611 Palbociclib (PD-0332991) hydrochloride Methanol-d4 |

8.002  
7.977  
7.956  
7.904  
7.899  
7.880  
7.876  
7.572  
7.570  
7.553  
7.550  
7.347  
7.328  
7.253  
7.236  
7.219  
7.215  
7.202  
7.182

3.331

2.507  
2.503  
2.499  
2.291

0.000

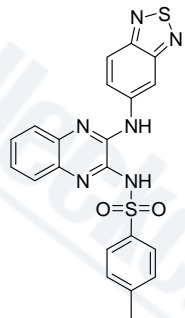

S111805, DMSO-d6

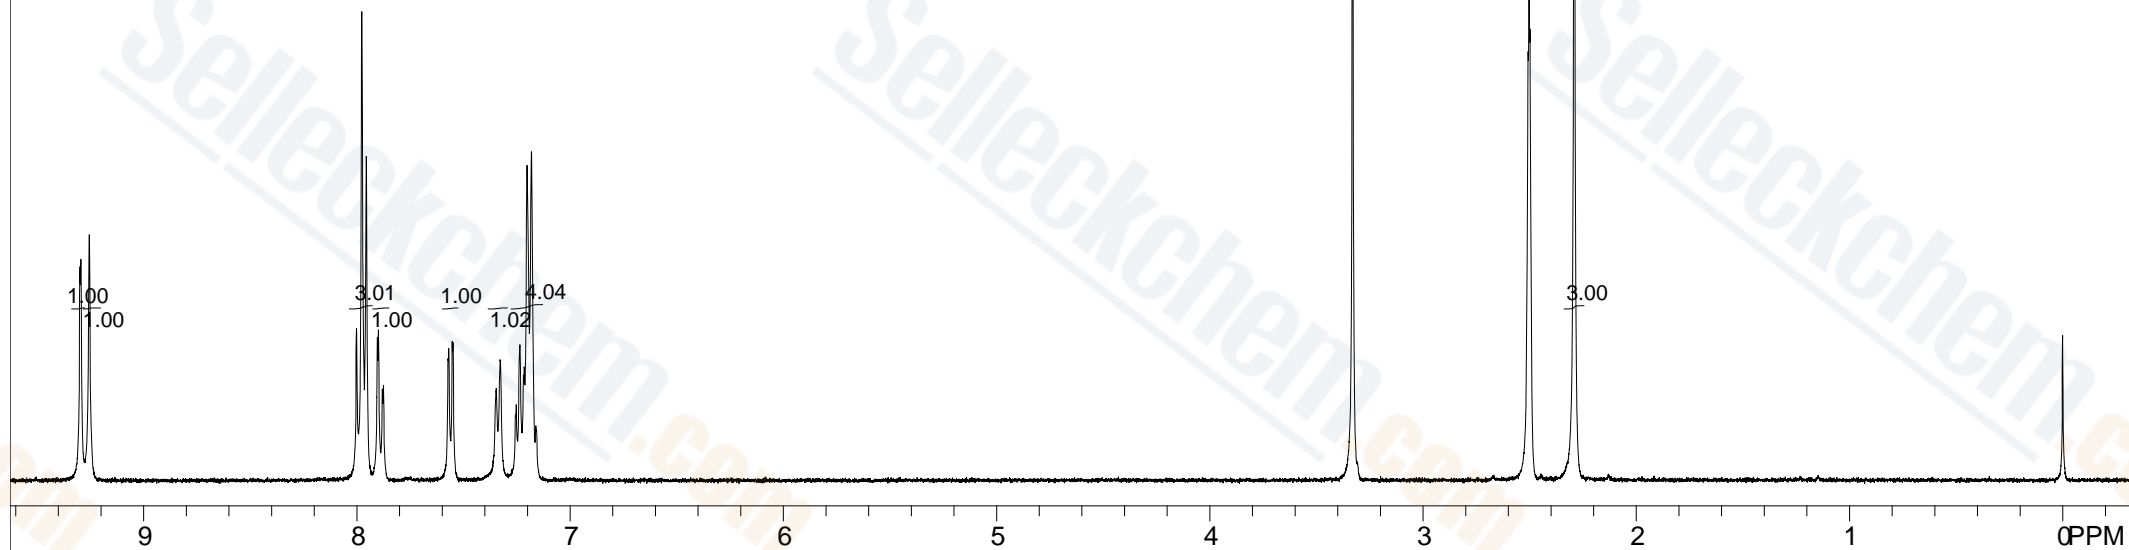

STANDARD PROTON PARAMETERS

|             |             |             |             |                      |
|-------------|-------------|-------------|-------------|----------------------|
| F1: 399.658 | F2: 100.503 | SW1: 8803   | OF1: 3607.3 | PTS1d: 32768 , 32768 |
| EX: s2pul   | PW: 6.5 us  | PD: 1.0 sec | NA: 8       | LB: 0.0              |

Nuts - \$S111805 XL147

Sample Name: F4082 S111805 XL147

=====  
Acq. Operator : Z  
Acq. Instrument : 1 Location : Vial 1  
Acq. Method : C:\CHEM32\1\METHODS\DEF\_LC.M

Analysis Method : C:\CHEM32\1\METHODS\DEF\_LC.M

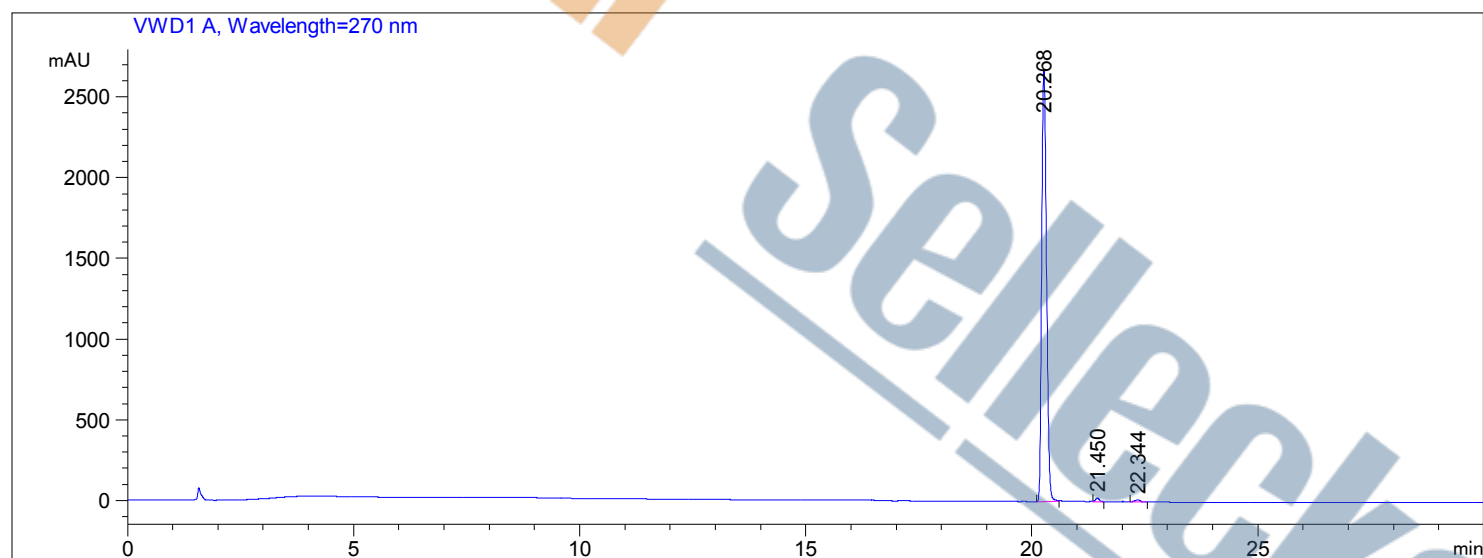

=====  
Area Percent Report  
=====

Sorted By : Signal  
Multiplier: : 1.0000  
Dilution: : 1.0000  
Use Multiplier & Dilution Factor with ISTDs

Signal 1: VWD1 A, Wavelength=270 nm

| Peak # | RetTime [min] | Type | Width [min] | Area mAU*s | Height [mAU] | Area %  |
|--------|---------------|------|-------------|------------|--------------|---------|
| 1      | 20.268        | BB   | 0.1195      | 2.00048e4  | 2668.20532   | 99.0663 |
| 2      | 21.450        | BB   | 0.0856      | 131.61520  | 23.54094     | 0.5505  |
| 3      | 22.344        | BB   | 0.1146      | 97.77931   | 12.90543     | 0.3832  |

Totals : 2.02341e4 2704.65170

=====  
\*\*\* End of Report \*\*\*

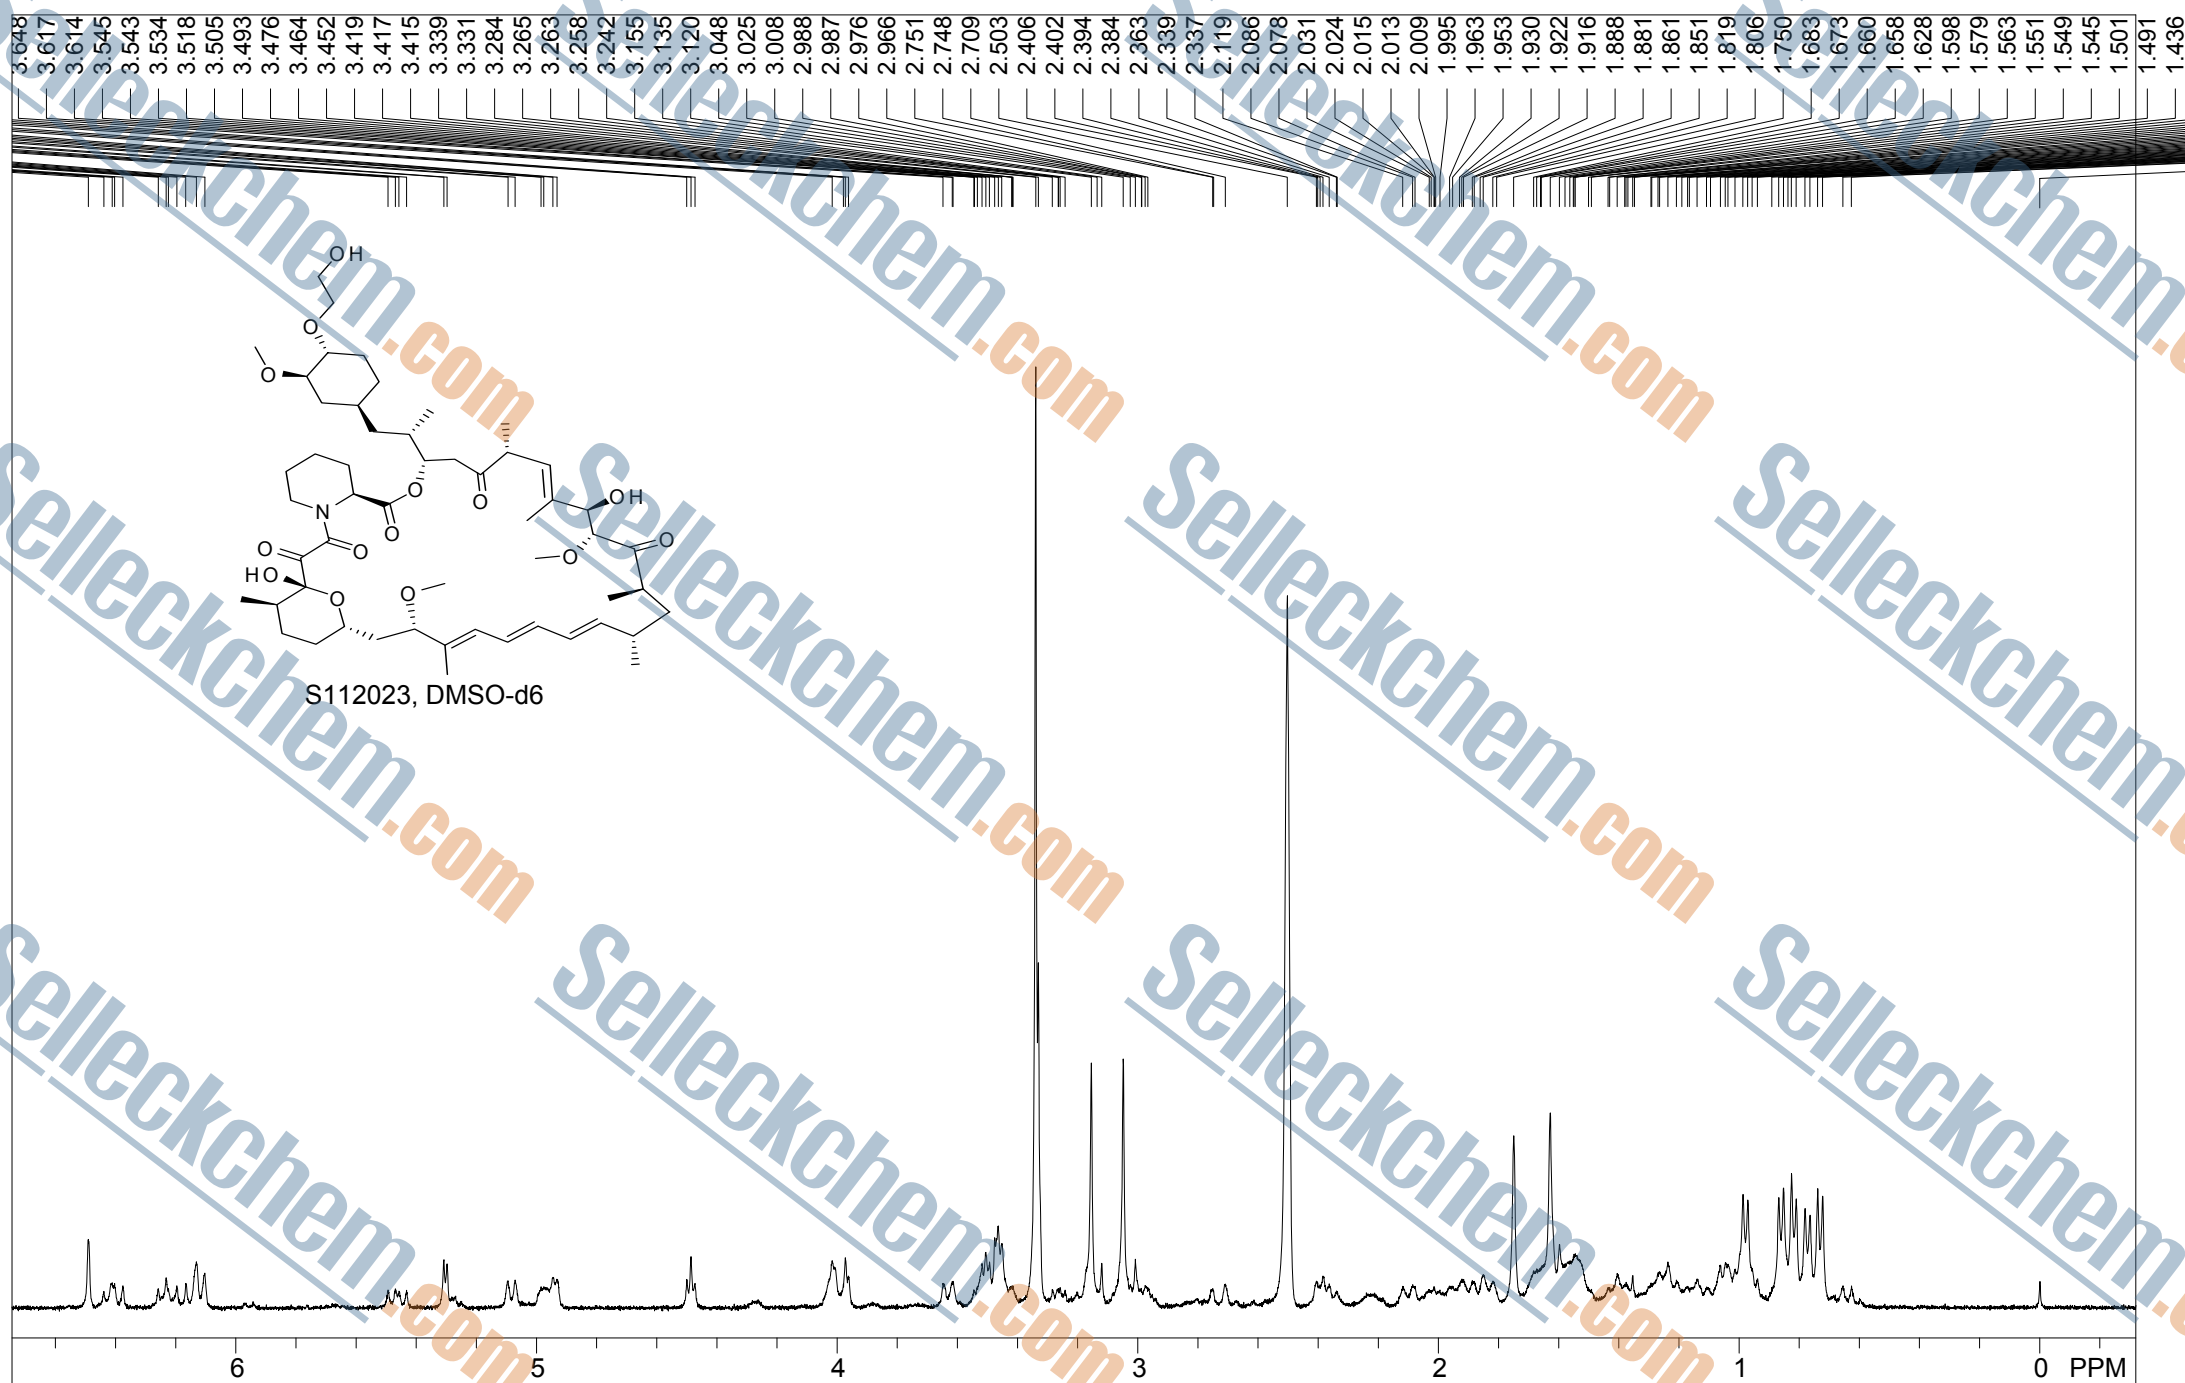

|               |             |             |             |                      |                             |  |
|---------------|-------------|-------------|-------------|----------------------|-----------------------------|--|
| ga:blank line |             |             |             |                      |                             |  |
| F1: 399.665   | F2: 100.504 | SW1: 8803   | OF1: 3606.2 | PTS1d: 32768 , 32768 |                             |  |
| EX: s2pul     | PW: 6.5 us  | PD: 2.0 sec | NA: 8       | LB: 0.0              | Nuts - \$S112023 Everolimus |  |

=====

|                 |          |            |            |
|-----------------|----------|------------|------------|
| Acq. Operator   | : SYSTEM | Seq. Line  | : 1        |
| Acq. Instrument | : 12601c | Location   | : Vial 65  |
|                 |          | Inj        | : 1        |
|                 |          | Inj Volume | : 2.000 µl |

Different Inj Volume from Sample Entry! Actual Inj Volume : 1.200 µl

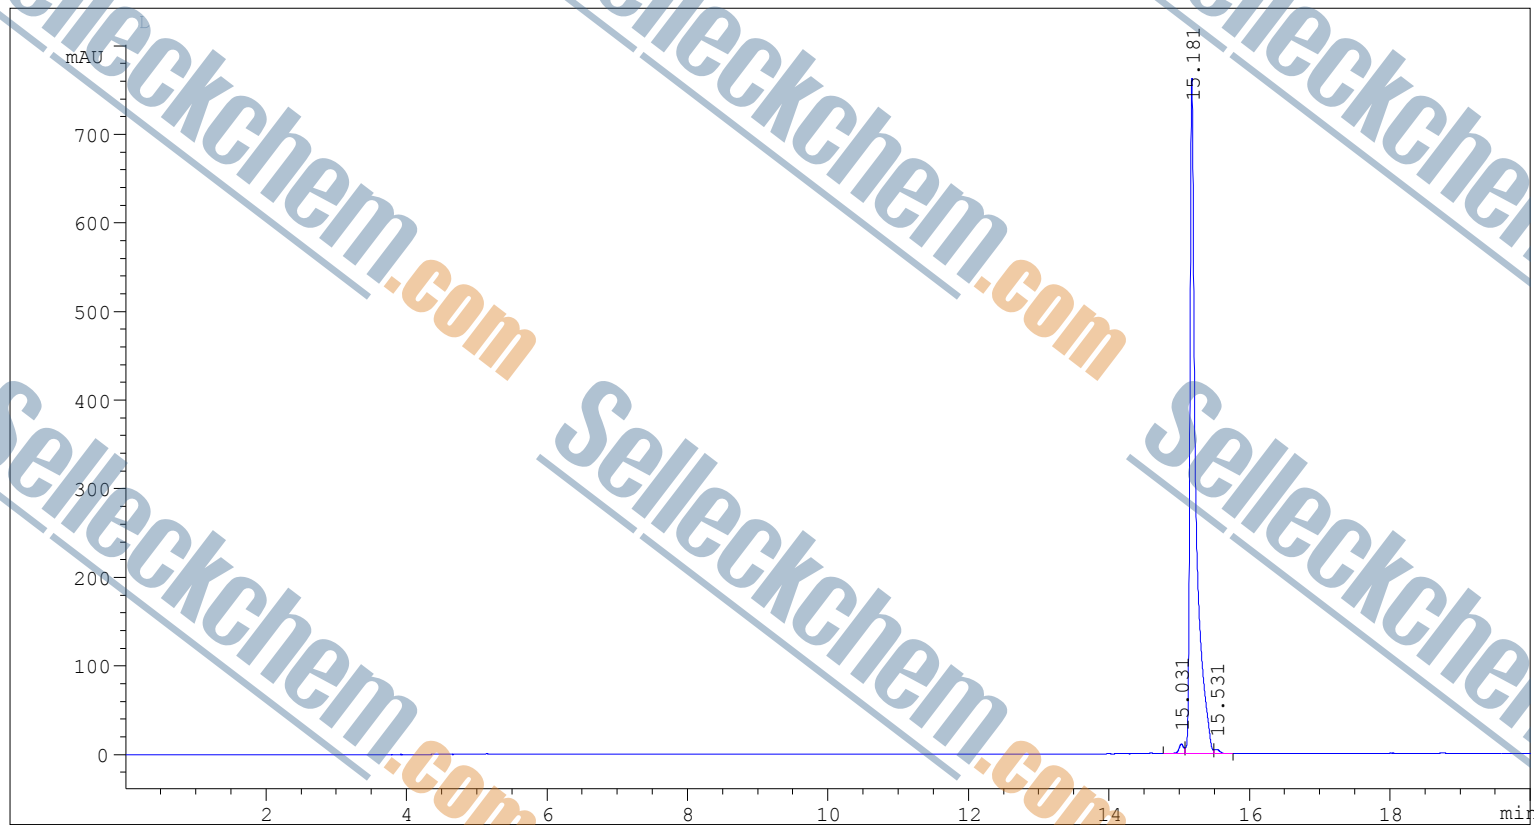

=====  
Area Percent Report  
=====

Sorted By : Signal  
Multiplier : 1.0000  
Dilution : 1.0000  
Use Multiplier & Dilution Factor with ISTDs

Signal 1: DAD1 E, Sig=277,4 Ref=550,100

| Peak # | RetTime [min] | Type | Width [min] | Area [mAU*s] | Height [mAU] | Area %  |
|--------|---------------|------|-------------|--------------|--------------|---------|
| 1      | 15.031        | BV   | 0.0700      | 50.29227     | 10.66969     | 0.6330  |
| 2      | 15.181        | VV   | 0.0826      | 4484.16797   | 762.14557    | 99.0460 |
| 3      | 15.531        | VB   | 0.0821      | 25.12546     | 4.64865      | 0.3210  |

Totals : 4559.58570 777.46391

=====  
\*\*\* End of Report \*\*\*

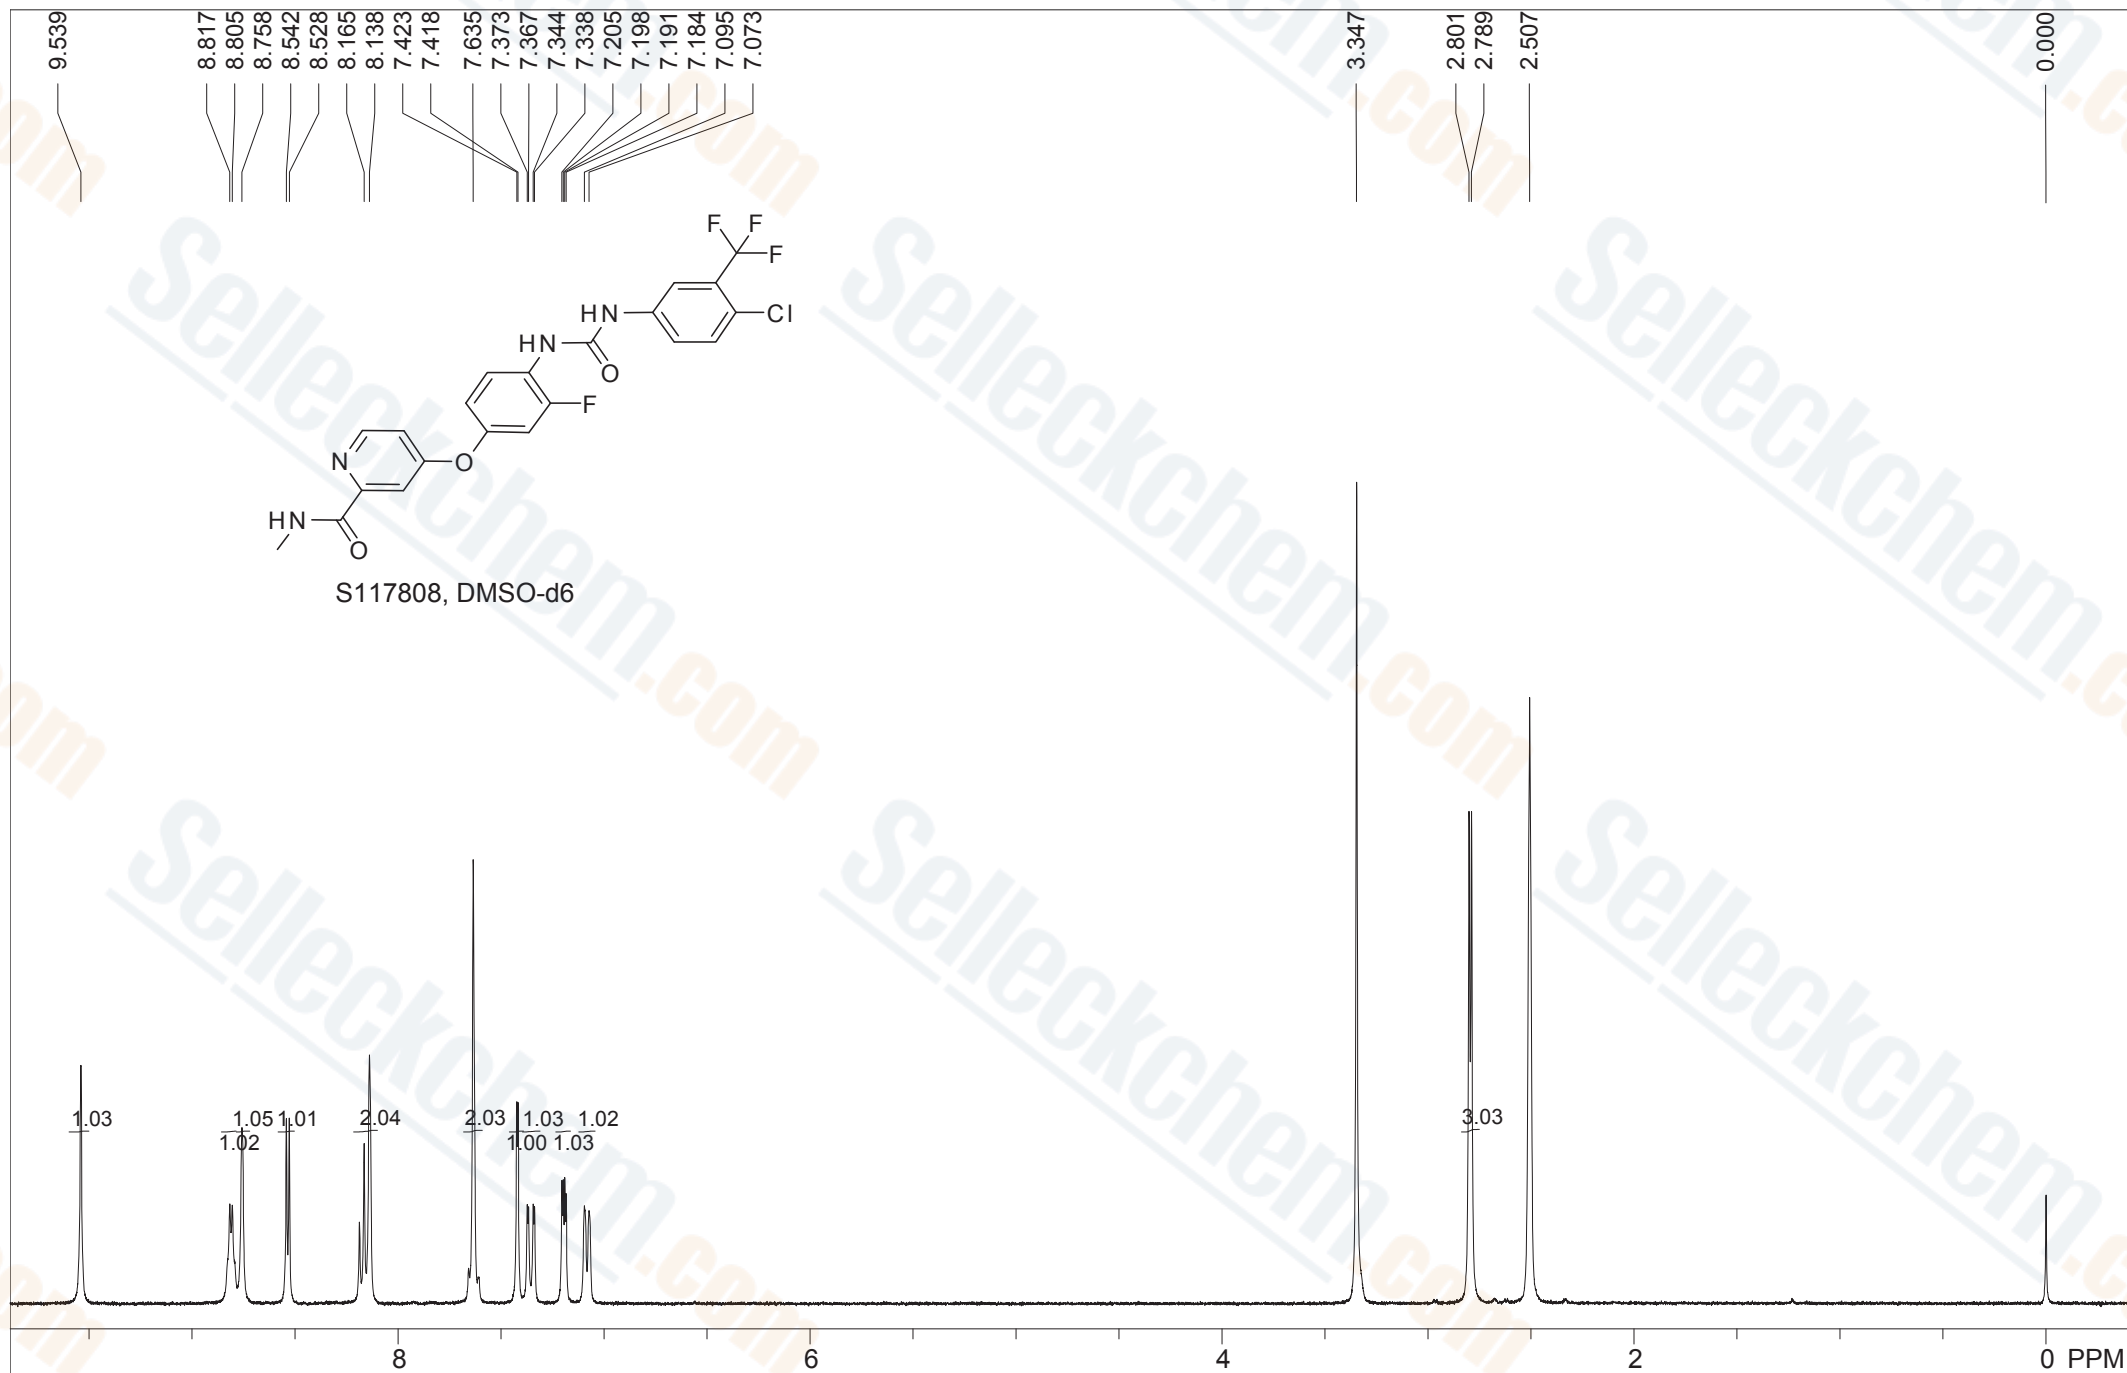

STANDARD PROTON PARAMETERS

|             |             |             |  |             |         |                              |
|-------------|-------------|-------------|--|-------------|---------|------------------------------|
| F1: 399.658 | F2: 100.503 | SW1: 8803   |  | OF1: 3609.2 |         | PTS1d: 32768 , 32768         |
| EX: s2pul   | PW: 6.5 us  | PD: 1.0 sec |  | NA: 8       | LB: 0.0 | Nuts - \$S117808 BAY 73-4506 |

# SAMPLE INFORMATION

Sample Name: F4496 S117808 BAY 73-4506  
Sample Type:  
Viat: 1  
Injection #: 11  
Injection Volume: 20.00 ul  
Run Time: 30.0 Minutes  
Sample Set Name:

Acquirde By: System  
Acq. Method Set: Z  
Processing Method: 262  
Channel Name:  
Proc. Chnl. Descr: 262

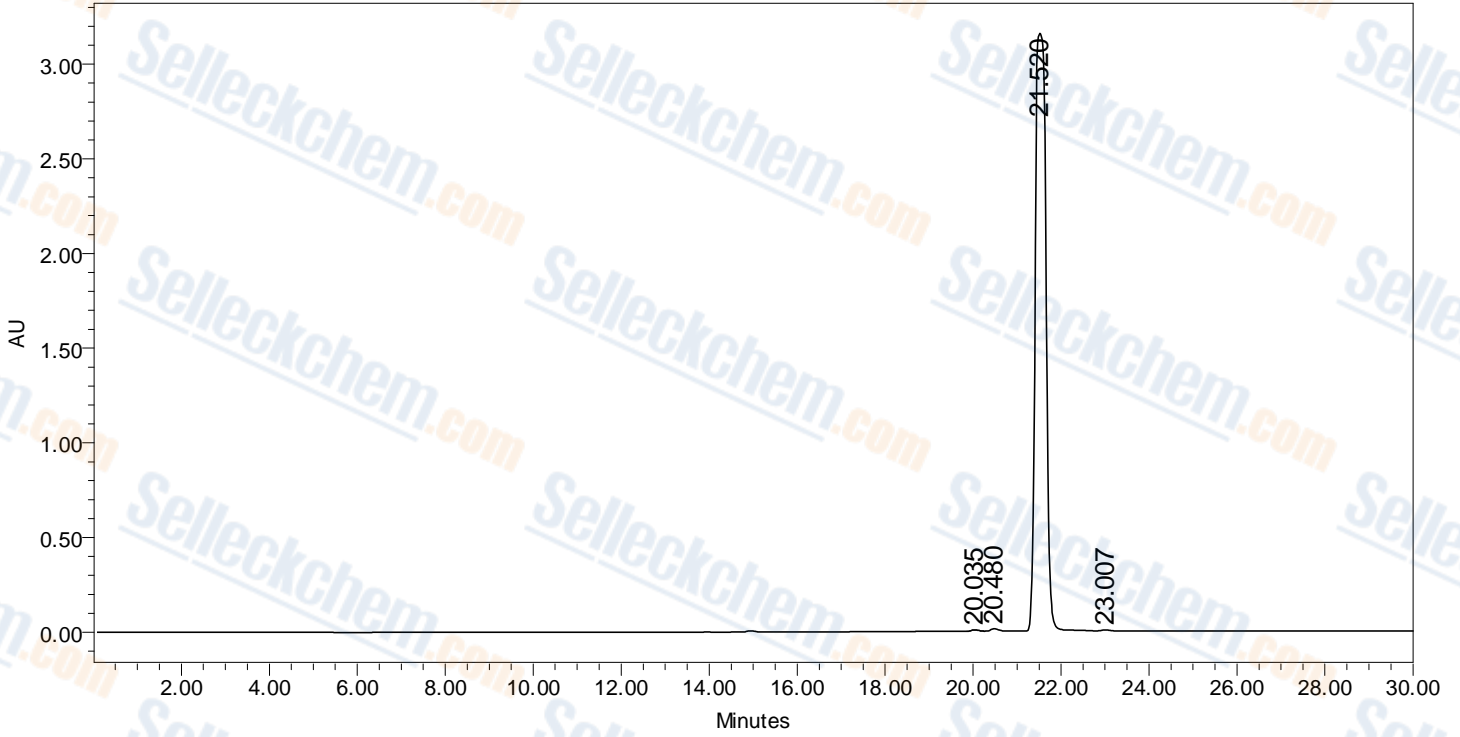

|   | RT     | Area     | Height  | % Area |
|---|--------|----------|---------|--------|
| 1 | 20.035 | 89014    | 7515    | 0.17   |
| 2 | 20.480 | 159101   | 12727   | 0.30   |
| 3 | 21.520 | 53099185 | 3153373 | 99.45  |
| 4 | 23.007 | 46034    | 5009    | 0.09   |

# SAMPLE INFORMATION

Sample Name: F2937 S120703 Tivozanib(AV-951) Acquirde By: System  
Sample Type: Viat: 1 Acq Method Set: Y  
Injection #: 8  
Injection Volume: 20.00 ul Processing Method: 254  
Run Time: 30.0 Minutes Channel Name:  
Sample Set Name: Proc. Chnl. Descr: 254

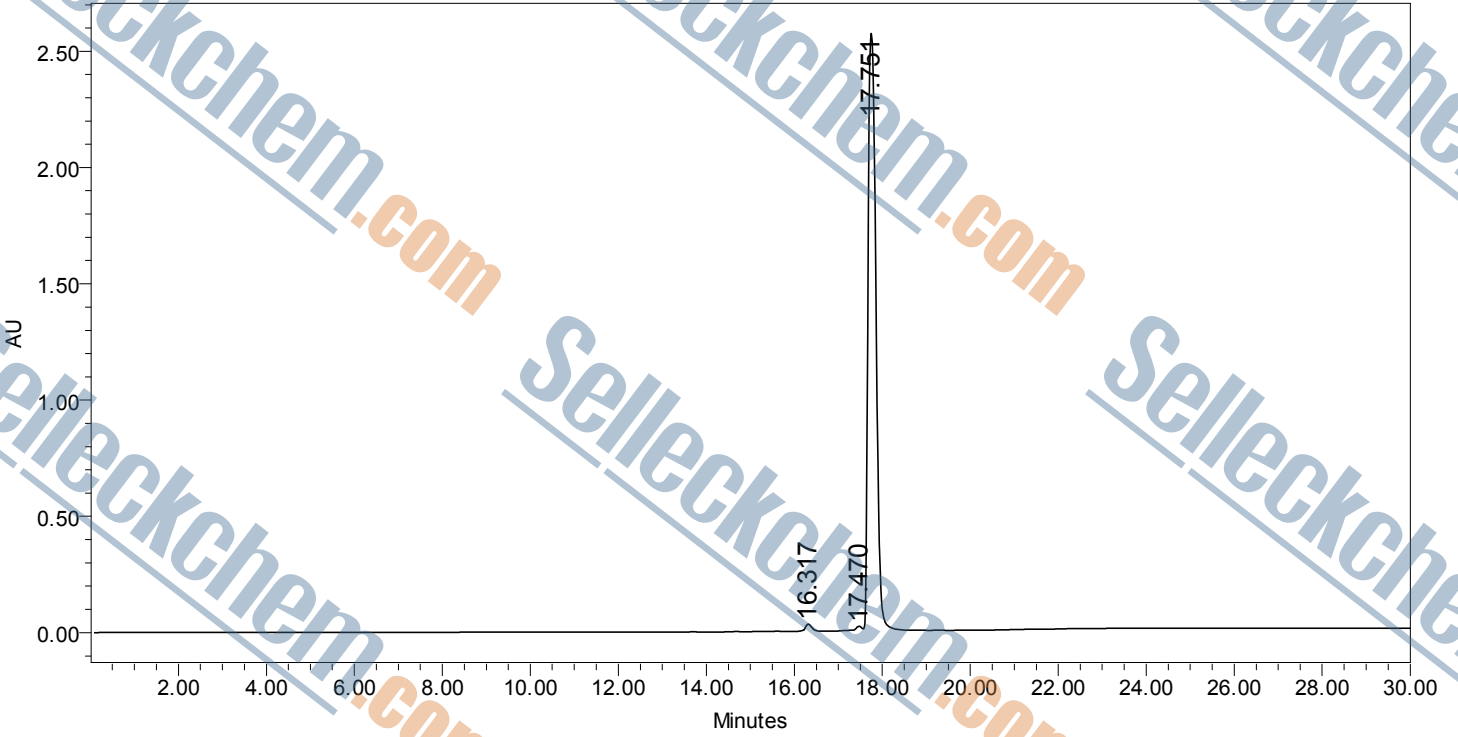

|   | RT     | Area     | Height  | % Area |
|---|--------|----------|---------|--------|
| 1 | 16.317 | 240630   | 27810   | 0.66   |
| 2 | 17.470 | 91869    | 13137   | 0.29   |
| 3 | 17.751 | 31415360 | 2560824 | 99.05  |
